# Supplementary material for: Quantifying thermal adaptation of soil microbial respiration
Source: Research Square preprint supplement (doi:10.21203/rs.3.rs-2566696/v1), 2023-02-27
Supplement: Supplementary file 1 [file f9121d00acdabdaac90b4c7f.xlsx]

## Sheet: Table S1. Site characteristics
Table S1. Soil and experimental details for each of the sampled soils.
ID	Mean soil temperature (°C)	Distance from thermal feature (cm)	NZ soil classification	Land use	Sampling method	Total C (%)	Total N (%)	Moisture content (gg-1)	pH	Date sampled	Incubation date
BAZIZ	11.978	N/A	Pallic	Dairy	core	4.2	0.36	0.257	5.56	2021-12-02	2021-12-17
BODOT	13.6831	N/A	Pallic	Cropland	core	3.99	0.4	0.349	5.94	2021-09-15	2021-10-22
DAFOB	12.7268	N/A	Brown	Cropland	core	2.9	0.27	0.218	5.63	2021-09-22	2021-10-28
DIZAF	10.9418	N/A	no S-Map coverage	Lowland grassland	core	5.89	0.55	0.445	5.32	2021-12-03	2021-12-20
FIGIZ	11.5144	N/A	Pallic	Cropland	core	2.81	0.28	0.301	5.68	2021-09-24	2021-10-29
FODAF	16.2354	N/A	Brown	Dairy	core	7.24	0.69	0.711	5.78	2021-09-30	2021-11-10
FUHAS	16.2546	N/A	Allophanic	Dairy	core	15.87	1.23	0.911	5.94	2021-10-11	2021-11-09
GAPIL	17.8069	N/A	Brown	Lowland grassland	core	11.47	1.13	0.554	5.12	2021-11-24	2021-12-06
GIGPA	11.5144	N/A	Pallic	Cropland	core	2.8	0.26	0.257	5.54	2021-09-24	2021-11-01
HADIV	17.1068	N/A	Brown	Lowland grassland	bulk density ring	9.62	0.665	0.591	5.14	2021-10-21	2021-11-11
HIHAK	16.2354	N/A	Gley	Dairy	core	5.71	0.56	0.49	6.01	2021-11-19	2021-11-29
JALAM	15.8063	N/A	Allophanic	Dairy	core	7.53	0.79	0.603	5.57	2021-09-15	2021-09-28
JOBAS	10.9836	N/A	Pallic	Lowland grassland	core	3.06	0.31	0.277	6.03	2021-12-01	2021-12-17
JUBIF	12.4001	N/A	Pallic	Cropland	core	2.32	0.23	0.178	5.83	2021-09-29	2021-11-03
KAKIG	16.7797	N/A	Allophanic	Horticulture	core	5.99	0.54	0.676	6.14	2021-11-04	2021-11-18
KILOR	16.7797	N/A	Allophanic	Horticulture	core	6.86	0.57	0.526	6.93	2021-11-17	2021-12-10
KOFIF	13.5362	N/A	Brown	Dairy	pit			0.306	5.73	2021-10-07	2021-11-05
MIJOZ	13.5362	N/A	Brown	Cropland	pit	3.1	0.285	0.22	5.78	2021-10-01	2021-11-04
MUFOV	12.1609	N/A	Melanic	Cropland	core	3.37	0.33	0.257	6.31	2021-09-17	2021-10-26
NAVUV	12.7268	N/A	Pallic	Cropland	core	3.05	0.29	0.261	6.22	2021-09-22	2021-10-21
NUMIT	13.7161	N/A	Pallic	Lowland grassland	core	3.07	0.27	0.372	6.52	2021-09-29	2021-11-02
RURIH	18.06	N/A	Gley	Dairy	core	5.98	0.6	0.38	6.03	2021-11-23	2021-12-10
SUTUK	13.7071	N/A	Semiarid	Horticulture	core	2.23	0.21	0.132	7.27	2021-11-30	2021-12-20
TIFOG	12.4001	N/A	Pallic	Cropland	core	3.37	0.33	0.282	6.87	2021-09-17	2021-10-27
TUJIP	11.978	N/A	Gley	Dairy	core	7.3	0.68	0.366	5.78	2021-12-02	2021-12-17
ZANUN	15.8063	N/A	Allophanic	Dairy	core	7.77	0.7	0.536	5.98	2021-11-05	2021-11-19
ZAVIT	15.8063	N/A	Allophanic	Horticulture	core	8.85	0.78	0.829	6.38	2021-11-03	2021-11-16
ZOMIH	16.7797	N/A	Pumice	Lowland grassland	core	5.37	0.48	0.376	5.81	2021-11-02	2021-11-15
Geothermal15	34.9965	15	Recent	Recreation	core	3.67259	0.238678	0.556	4.26	2020-11-30	2020-12-01
Geothermal25	32.217	25	Recent	Recreation	core	4.80136	0.29732	0.539	5.09	2020-12-07	2020-12-10
Geothermal40	29.8551	40	Recent	Recreation	core	5.25822	0.341625	0.62	4.72	2020-11-30	2020-12-03
Geothermal45	29.2908	45	Recent	Recreation	core			0.543	4.31	2021-05-04	2021-05-05
Geothermal50	28.7951	50	Recent	Recreation	core	5.78281	0.353473	0.525	5.38	2020-12-07	2020-12-09
Geothermal65	27.5969	65	Recent	Recreation	core			0.477	4.35	2021-03-23	2021-03-25
Geothermal120	24.9876	120	Recent	Recreation	core			0.595	4.7	2021-04-20	2021-04-22
Geothermal150	24.1004	150	Recent	Recreation	core	12.1721	0.710617	0.468	4.67	2021-02-01	2021-02-04
Geothermal250	22.1863	250	Recent	Recreation	core			0.687	4.64	2021-04-20	2021-04-23
Geothermal295	21.5993	295	Recent	Recreation	core	11.8749	0.677567	0.796	4.72	2020-11-30	2020-12-02
Geothermal305	21.483	305	Recent	Recreation	core	12.834	0.750748	0.647	4.93	2020-12-07	2020-12-08
Geothermal350	21.0094	350	Recent	Recreation	core	10.8903	0.629289	0.439	4.77	2021-02-01	2021-02-02
Geothermal500	19.8298	500	Recent	Recreation	core			0.621	4.81	2021-05-04	2021-05-06
Geothermal750	18.5691	750	Recent	Recreation	core			0.511	4.74	2021-04-28	2021-04-23
Geothermal1000	17.7236	1000	Recent	Recreation	core			0.427	4.77	2021-05-04	2021-05-07
Geothermal1250	17.0943	1250	Recent	Recreation	core			0.537	4.83	2021-04-28	2021-04-30
Geothermal1495	16.6058	1495	Recent	Recreation	core	8.87596	0.494898	0.602	5.32	2020-11-30	2020-12-04
Geothermal1505	16.5879	1505	Recent	Recreation	core	9.3358	0.505364	0.539	4.77	2020-12-07	2020-12-11
Geothermal1550	16.5089	1550	Recent	Recreation	core			0.523	4.73	2021-04-20	2021-04-21
Geothermal1595	16.4325	1595	Recent	Recreation	core	6.83347	0.392617	0.354	5.19	2021-02-01	2021-02-03

## Sheet: Table S2. ICPMS data
Table S2. Elemental data from along the geothermal gradient. All data is presented as ppm.
Distance from thermal feature (cm)	Replicate	Na	Mg	Al	Si	P	S	K	Ca	V	Cr	Mn	Fe	Co	Ni	Cu	Zn	As	Se	Sr	Ag	Cd	Ba	Hg	Tl	Pb	U
5	1	126.26	31.2505	4263.51	2750.65	202.877	1147.67	275.869	75.087	5.23686	1.65811	7.7062	5395.73	0.07279	0.288148	9.4883	17.7417	2.34032	0.28865	3.46179	1.61343	0.02761	26.2546	0	0	10.428	1.11896
5	2	109.41	33.6069	9220.86	5398.28	207.659	1684.32	193.268	62.6417	6.56767	2.0341	11.7192	5733.79	0.11044	0.410134	4.30766	13.291	2.66863	0.418668	3.91108	1.20731	0.009036	24.9203	0.0502	0.01004	5.66909	1.44225
10	1	114.97	38.7243	8681.28	5039.12	204.987	1160.89	180.381	94.3697	6.44317	2.09936	11.9596	5682.47	0.107428	0.524088	6.57118	21.2933	2.8875	0.407624	3.82373	1.36343	0.019076	23.5689	0.443266	0.011546	7.35832	1.46082
10	2	112	43.0099	9680.17	5835.98	215.692	1393.39	174.402	104.406	6.59226	2.15308	13.2242	5826.02	0.160138	0.50451	5.17863	25.7923	2.74042	0.442764	3.76701	1.34134	0.024096	24.5704	0.48945	0.011044	6.74487	1.47186
20	1	102.61	33.5165	8172.59	4980.47	205.907	1021.23	185.443	76.2044	5.07673	1.75098	9.36531	4517.07	0.091866	0.433226	4.016	13.933	2.32175	0.270578	3.28107	1.85589	0.022088	20.4936	0.370978	0.011546	5.9487	0.827798
20	2	126.45	46.3045	10812.2	6895.49	213.843	1158.39	146.896	102.708	6.00091	1.91563	11.9747	5208.6	0.127508	0.458828	3.33579	15.2226	2.65407	0.388548	3.97383	1.34084	0.031626	13.0746	0.615954	0.016566	5.6987	0.710832
30	1	92.62	35.9593	10421.4	6558	211.053	1049.15	148.057	73.1283	6.03806	1.79716	10.9466	5273.94	0.098392	0.344874	13.1132	26.0302	2.73289	0.418668	3.766	1.44174	0.01757	17.2527	0.6024	0.018574	7.83371	0.705812
30	2	94.88	39.281	10468.7	6603.79	212.087	1032.22	147.849	84.3459	6.08976	2.00097	11.4672	5055.16	0.115962	0.366962	8.65548	26.4403	2.67064	0.380516	3.75295	1.59234	0.02761	19.4645	0.676194	0.038654	6.7278	0.650592
50	1	116.19	34.4332	9686.13	5603.33	206.962	820.729	158.712	112.742	5.38746	1.65811	11.5591	4505.76	0.101404	0.351902	5.66055	28.4935	2.3835	0.375998	3.43719	1.66965	0.021586	16.0173	0.540152	0.022088	6.72981	0.56475
50	2	124.92	47.2497	9949.17	5594.07	207.43	967.101	147.25	106.853	5.70874	1.79666	14.565	4755.2	0.126002	0.405616	10.0942	14.4626	2.44725	0.336842	3.8157	1.25199	0.043172	18.1493	0.733924	0.03765	7.16203	0.575292
80	1	106.14	58.9845	10198.8	5544.97	210.992	618.637	113.016	141.913	5.27	1.64254	25.6251	4259.59	0.16566	0.402102	7.38392	21.7983	2.3353	0.300196	3.4643	1.23542	0.048694	13.2282	0.541658	0.035642	7.03202	0.551196
80	2	113.28	49.9711	11868.4	5645.39	215.343	668.028	136.199	144.837	5.86336	2.05469	25.4961	5036.03	0.140058	0.463848	6.29508	16.4164	2.58279	0.266562	3.59834	2.43018	0.02761	14.4174	0.673182	0.035642	7.13091	0.623986
150	1	111.56	60.5999	8748.63	3500.92	282.545	861.449	170.403	320.223	4.28658	1.76955	14.5962	3646.61	0.142066	0.427704	9.28499	17.9852	1.99545	0.274594	2.92415	2.68821	0.038152	13.7227	0.479912	0.029116	8.49786	0.44427
150	2	110.37	65.2625	9368.82	3898.99	277.604	889.641	148.28	277.075	4.43567	1.90208	15.9551	3857.39	0.142066	0.577802	15.2377	33.6119	2.11744	0.305216	3.21732	1.3554	0.084838	13.4636	0.48945	0.030622	12.7403	0.46937
200	1	100.54	62.8815	7755.04	2609.08	377.601	1188.14	204.205	424.444	3.6907	1.67969	12.0721	3078.17	0.131524	0.490956	15.0585	20.5238	1.90459	0.342364	2.96481	1.43974	0.24598	16.5529	0.439752	0.018072	10.2042	0.365958
200	2	108.51	66.2685	11272.2	5093.47	261.439	847.991	161.803	300.845	5.3704	1.88752	30.3434	4229.53	0.199294	0.435234	10.3668	25.8706	2.38852	0.229916	3.59332	1.56524	0.119978	14.4882	0.543666	0.03263	8.25288	0.53212
350	1	104.706	104.135	12791.6	4811.4	344.077	805.07	217.319	531.491	5.95121	2.27456	35.4844	4217.69	0.198792	0.480414	12.914	34.4377	2.95728	0.480916	4.56368	1.16163	0.066264	19.9711	0.482422	0.034136	12.8572	0.60993
350	2	105.45	98.278	13495.2	5650.12	389.795	1070.92	226.111	421.828	5.08426	1.96031	26.5804	4537.01	0.221884	0.503506	7.08724	31.0306	2.62496	0.258028	4.16108	1.31273	0.06024	11.0335	0.482924	0.023594	11.1715	0.636034
500	1	108.91	78.2086	14129.7	5142.46	304.544	895.731	191.724	389.612	5.43465	2.48339	83.8445	4221.23	0.200298	0.450294	10.6519	28.0688	3.30567	0.255016	4.91809	3.20326	0.069778	16.9279	0.420174	0.023092	12.3457	0.63001
500	2	110.24	79.4812	13811.7	5627.44	292.609	891.09	185.227	286.045	5.81969	2.09183	35.9231	3973.81	0.24347	0.551698	7.8061	23.2677	2.72034	0.321782	4.0411	1.6817	0.055722	21.7376	0.341862	0.037148	10.2915	0.60993
650	1	100.66	45.2312	14941.8	5478.35	250.435	839.995	169.962	257.907	3.80918	1.62698	28.6918	4078.34	0.107428	0.41164	5.38345	33.9166	2.39755	0.229916	3.78809	1.1556	0.044678	23.848	0.528606	0.003514	8.48882	0.583826
650	2	126.55	44.7126	20699.7	9555.24	233.068	1145.16	181.18	205.67	7.29607	2.59885	38.8207	5629	0.17068	0.861432	11.1901	17.5665	3.17264	0.297686	4.89099	0.9789	0.035642	9.91149	0.536136	0.019076	5.63043	0.692258
1000	1	138.39	93.13	13665.3	6034.03	357.894	816.803	196.518	369.534	5.8744	2.23641	30.7721	4743.32	0.172186	0.494972	4.64752	34.2414	2.58731	0.328308	4.0662	1.45279	0.109938	11.2112	0.593364	0.028614	8.96672	0.641054
1000	2	116.23	79.2307	15586.9	6881.3	382.057	887.453	197.579	297.363	6.99085	2.71883	48.0655	5323.29	0.191764	0.543164	4.63697	26.1793	2.83881	0.377504	4.49792	1.45931	0.083834	9.72173	0.706816	0.033634	10.7092	0.759024
1300	1	135.08	104.552	13407.2	5310.07	267.281	641.386	158.172	222.548	5.46477	2.25348	36.2263	4900.29	0.234434	0.570272	11.8231	16.5434	2.21382	0.371982	3.40306	1.70278	0.31124	9.10327	0.471378	0.032128	9.05859	0.676696
1300	2	117.04	76.9666	14132.4	5663.87	327.418	818.336	206.748	268.26	5.42762	2.28661	65.5642	5111.59	0.254012	0.479912	4.53457	20.7321	2.53912	0.307726	4.00094	1.30369	0.10793	8.93811	0.757518	0.018574	10.0646	0.715852
1600	1	118.07	103.823	14698.8	7677.99	293.747	936.206	165.833	164.034	5.48636	1.99595	22.96	4577.98	0.16064	0.46435	9.98327	22.7055	2.38048	0.32881	3.99642	1.01454	0.05271	7.68211	0.604408	0.028614	7.8066	0.600894
1600	2	126.34	51.0132	19214.8	10702.3	331.044	1149.45	155.215	228.141	7.1279	2.18069	30.1692	5418.18	0.15813	0.390556	6.66104	17.4325	2.8619	0.346882	4.81067	1.45379	0.057228	6.00342	0.6275	0.012048	5.86637	0.754506

## Sheet: Table S3. ASV counts
Table S3. ASV counts from along the geothermal gradient. Column headers indicate distance (cm) from the geothermal feature. Sinlgetons are removed.
	5 rep #1	5 rep #2	10 rep #1	20 rep #1	20 rep #2	30 rep #1	50 rep #1	50 rep #2	80 rep #1	150 rep #1	150 rep #2	200 rep #2	350 rep #1	350 rep #2	500 rep #1	500 rep #2	650 rep #1	1000 rep #1	1300 rep #1	1300 rep #2	1600 rep #1
ASV_2	592	771	696	919	1144	1575	1021	649	210	0	1	0	0	0	0	1	0	0	0	0	0
ASV_3	1098	1330	1028	648	348	401	229	28	4	0	0	0	0	0	0	0	0	0	0	0	2
ASV_4	0	0	0	0	0	0	0	0	9	285	194	209	938	536	193	1068	579	203	260	128	249
ASV_5	0	0	1	0	0	1	86	106	1049	1172	1238	446	274	109	93	142	90	20	4	0	10
ASV_7	0	0	0	0	0	0	0	0	1	411	131	65	658	227	293	475	451	1	4	355	43
ASV_8	0	3	0	0	0	0	0	1	35	247	320	385	221	186	110	319	332	278	256	6	145
ASV_9	0	0	0	0	0	0	0	0	2	295	353	312	323	396	10	102	31	8	196	2	90
ASV_10	0	0	0	0	0	0	0	1	0	0	0	1	459	401	317	186	288	17	101	311	0
ASV_11	0	1	0	1	166	260	530	401	384	79	100	9	5	1	14	30	2	0	2	15	0
ASV_12	199	181	333	256	330	367	137	96	64	0	0	0	0	0	0	0	0	0	0	0	0
ASV_13	0	0	10	63	62	542	518	331	394	0	1	0	0	0	1	0	0	0	0	0	0
ASV_14	0	0	0	0	0	0	1	1	36	398	243	169	251	239	107	82	110	92	93	54	42
ASV_15	0	2	0	0	0	0	0	2	2	144	246	309	222	238	104	303	177	6	28	3	83
ASV_16	0	0	0	0	0	0	0	0	3	342	440	248	87	85	6	81	138	34	65	4	299
ASV_17	1142	559	117	7	0	0	0	0	0	0	0	0	0	0	0	1	0	0	0	0	0
ASV_19	0	1	0	0	0	0	0	0	0	7	93	231	164	65	1	197	307	299	76	8	218
ASV_21	0	1	0	0	0	0	0	0	1	177	570	198	190	329	27	107	10	0	5	5	21
ASV_22	0	0	0	0	489	452	370	301	11	0	0	0	0	0	0	0	0	0	0	0	0
ASV_23	0	2	0	0	0	0	0	0	2	39	92	143	364	320	131	212	104	16	62	18	93
ASV_24	361	348	413	155	62	143	45	14	1	0	0	0	0	0	0	0	0	0	0	0	0
ASV_25	591	217	298	166	189	4	1	0	1	0	0	0	1	2	2	2	4	3	1	2	2
ASV_26	0	0	0	0	2	0	0	0	2	0	1	3	315	29	106	103	277	3	12	607	19
ASV_27	1	0	0	0	3	3	278	113	320	19	46	62	26	21	13	30	102	40	85	10	199
ASV_28	0	0	0	0	0	0	0	0	47	234	218	168	134	340	69	100	31	1	15	38	3
ASV_29	125	112	419	237	44	314	101	8	0	0	0	0	0	0	0	0	0	0	0	0	0
ASV_30	1	1	1	5	16	4	3	1	5	53	92	50	192	275	251	112	118	49	43	71	16
ASV_33	104	51	346	178	98	390	95	59	2	0	0	0	0	0	0	0	0	0	0	0	0
ASV_35	0	0	0	0	0	0	0	0	2	453	250	151	78	130	42	115	22	0	0	6	1
ASV_36	0	0	0	0	0	0	0	0	6	77	196	178	204	156	83	115	107	28	34	31	28
ASV_37	0	0	1	4	0	6	22	22	59	135	121	102	109	132	84	83	109	66	37	59	64
ASV_38	0	1	3	4	0	0	13	15	56	77	78	45	87	111	109	99	152	132	92	66	73
ASV_39	120	4	266	277	96	241	99	87	1	1	0	0	0	1	0	1	0	1	0	0	0
ASV_40	0	0	0	0	0	1	2	0	1	34	39	63	90	67	69	117	222	186	140	50	113
ASV_41	87	84	190	118	164	171	130	82	43	0	0	0	0	0	0	0	0	0	0	0	0
ASV_42	0	0	0	0	0	0	0	0	0	6	2	12	146	321	212	61	77	96	9	140	4
ASV_43	305	2	500	171	8	76	0	0	0	0	0	0	0	0	0	0	0	0	0	0	0
ASV_44	10	67	107	245	44	308	273	1	0	0	0	0	0	0	0	0	0	0	0	0	0
ASV_45	35	766	79	46	46	6	0	0	1	0	0	0	0	0	0	0	0	0	0	0	0
ASV_46	92	620	232	2	25	60	0	0	0	0	0	0	0	0	0	0	0	0	0	0	0
ASV_47	0	0	0	0	0	0	122	64	291	29	69	32	4	11	3	39	54	59	107	0	106
ASV_48	0	0	0	0	0	1	1	27	130	654	136	35	2	7	1	2	1	1	0	1	1
ASV_49	0	0	0	0	0	0	0	0	6	32	28	76	35	42	60	94	151	93	115	117	139
ASV_50	0	0	0	0	0	0	0	0	0	156	327	363	34	74	3	10	1	4	3	0	1
ASV_51	0	0	0	0	0	0	2	0	0	75	48	25	68	24	88	83	130	169	108	36	62
ASV_52	0	0	0	0	0	0	158	242	465	28	3	0	0	2	0	2	7	13	3	0	5
ASV_53	185	214	130	96	62	136	40	37	22	0	0	1	0	0	0	0	0	0	0	0	0
ASV_54	0	0	0	0	0	0	0	0	0	62	149	116	84	415	9	26	5	7	6	14	3
ASV_57	0	0	0	0	0	0	0	0	0	0	0	0	58	4	69	21	117	105	25	272	186
ASV_58	0	0	0	0	1	0	1	1	11	35	58	63	100	92	76	117	128	44	73	31	52
ASV_59	0	0	1	0	14	28	38	129	253	100	100	74	22	14	1	23	12	13	19	0	35
ASV_60	495	62	197	46	14	54	3	2	0	0	0	0	0	0	0	0	0	0	0	0	0
ASV_61	0	0	0	0	0	0	1	0	0	61	157	412	21	43	11	61	30	5	10	0	38
ASV_62	1	0	2	2	11	149	118	132	167	13	19	25	35	33	44	17	13	16	13	6	2
ASV_66	0	0	0	0	0	0	0	0	1	4	20	90	106	104	55	73	189	3	5	0	87
ASV_67	0	0	0	0	0	0	0	0	0	11	16	206	7	69	0	7	15	56	238	0	125
ASV_68	139	277	205	47	9	42	9	0	0	0	0	0	0	0	0	0	0	0	0	0	0
ASV_69	0	0	0	0	0	0	0	1	3	270	189	131	51	28	6	9	24	10	6	2	8
ASV_70	0	1	0	0	0	0	1	2	0	11	10	67	173	342	16	107	4	2	2	1	0
ASV_71	0	0	0	0	1	0	0	0	0	0	2	35	58	38	84	36	126	102	76	64	92
ASV_72	2	0	0	2	0	15	11	11	10	83	87	58	94	128	70	86	13	16	16	13	5
ASV_76	77	13	263	98	45	118	30	6	1	1	2	0	1	5	0	0	5	2	5	1	5
ASV_77	0	1	3	7	1	3	4	6	11	45	29	59	51	46	42	66	108	65	31	18	71
ASV_78	0	0	0	0	4	0	3	4	4	48	37	45	96	117	28	45	61	55	63	23	42
ASV_79	677	3	0	0	0	0	0	0	0	0	0	0	0	0	0	0	0	0	0	0	0
ASV_80	8	1	20	24	35	23	99	110	109	13	4	15	8	11	7	9	20	44	41	1	43
ASV_81	0	0	0	0	0	1	9	18	44	18	16	13	13	11	31	17	121	103	92	92	35
ASV_82	0	0	0	1	0	0	0	0	0	4	2	14	14	8	2	14	102	229	109	4	137
ASV_83	0	0	0	0	0	0	0	0	23	169	379	41	12	8	2	3	0	0	1	0	3
ASV_84	23	9	15	1	91	22	42	41	226	3	0	6	5	1	2	3	8	27	3	3	81
ASV_85	1	0	0	0	0	2	2	3	203	21	41	133	33	34	0	5	6	20	32	0	77
ASV_87	0	0	0	0	0	0	10	10	129	10	4	47	33	14	9	24	44	48	49	88	81
ASV_88	0	0	0	0	0	0	1	0	1	13	6	20	42	38	17	32	164	71	69	92	26
ASV_89	43	27	105	207	8	198	0	3	0	0	0	0	0	0	0	0	0	0	0	0	0
ASV_90	0	0	0	0	0	0	0	0	0	4	4	1	82	25	228	93	54	2	3	91	2
ASV_91	0	0	0	0	0	0	0	0	0	2	1	6	70	19	61	67	120	46	29	48	116
ASV_94	2	0	0	0	0	0	0	0	5	25	110	74	79	79	7	63	56	35	23	3	8
ASV_95	0	0	0	0	0	0	5	3	52	30	35	106	8	29	2	41	67	41	60	0	78
ASV_96	0	0	0	0	0	0	4	5	20	24	16	27	33	27	25	24	141	66	63	28	30
ASV_97	0	0	0	0	59	89	83	268	43	1	3	0	0	1	0	0	0	1	0	0	0
ASV_98	0	0	0	0	1	0	103	125	293	34	0	0	0	0	0	0	0	1	1	0	0
ASV_99	0	0	0	0	0	0	0	0	0	0	3	2	2	12	361	18	11	101	19	6	24
ASV_100	0	0	0	0	0	0	0	0	0	0	0	0	210	41	256	10	1	1	0	38	1
ASV_101	0	0	0	1	0	0	0	1	1	5	10	38	162	62	33	142	61	1	8	12	9
ASV_103	0	0	0	0	0	0	1	2	93	166	209	46	9	8	0	3	1	0	1	1	0
ASV_104	0	0	0	0	0	0	0	0	87	13	10	17	87	33	3	16	3	130	72	0	69
ASV_105	0	0	1	9	216	6	122	84	77	2	0	1	0	0	0	0	0	0	0	0	0
ASV_106	0	0	0	0	0	0	1	0	3	6	7	15	36	11	9	54	119	91	77	8	55
ASV_108	0	0	0	0	0	0	0	0	0	0	0	0	64	62	126	74	64	27	23	65	14
ASV_109	0	0	0	0	0	0	0	0	0	0	0	0	8	5	8	22	65	184	105	7	97
ASV_111	0	0	0	0	0	0	0	0	22	148	55	12	17	8	0	14	76	46	77	13	11
ASV_112	0	0	0	0	0	0	0	0	5	391	3	33	39	17	1	0	5	2	0	3	3
ASV_114	0	1	0	0	0	0	17	6	37	34	17	32	78	97	17	49	34	28	18	5	11
ASV_115	0	0	0	0	0	0	1	0	1	24	5	58	16	80	26	51	85	32	25	54	12
ASV_116	0	0	0	0	8	1	18	36	49	6	7	45	13	12	10	10	52	19	66	20	98
ASV_117	0	0	0	1	0	2	0	0	0	0	11	29	44	76	16	60	41	5	75	10	83
ASV_119	0	0	0	0	0	0	0	0	2	3	7	43	43	37	36	175	39	5	8	38	23
ASV_120	1	0	0	0	0	0	0	0	5	160	106	40	29	32	3	6	17	31	14	2	10
ASV_121	0	0	0	0	0	0	0	0	0	12	34	67	91	52	9	35	75	6	21	13	40
ASV_122	0	0	0	0	0	0	0	0	2	37	26	14	72	29	57	158	36	1	1	12	3
ASV_123	0	0	0	0	2	1	0	0	0	0	0	1	0	7	16	12	55	58	137	0	142
ASV_125	0	0	0	0	0	0	3	5	6	5	14	7	73	20	84	160	43	3	2	15	3
ASV_126	0	0	0	1	0	2	1	11	23	205	115	24	17	20	6	3	3	2	2	2	0
ASV_127	0	0	0	0	0	0	7	19	126	171	101	1	2	0	1	0	0	0	0	0	1
ASV_129	0	0	0	0	0	0	0	0	2	47	71	34	54	31	27	34	46	38	23	1	9
ASV_130	0	0	0	0	0	0	0	0	0	97	86	42	50	104	2	27	0	1	6	0	0
ASV_131	1	0	0	4	0	2	0	25	78	24	14	33	30	7	37	7	24	36	17	31	32
ASV_133	0	0	0	0	0	0	0	1	6	139	129	54	12	19	1	27	15	0	1	1	0
ASV_134	0	0	0	0	0	0	0	2	4	56	84	167	26	30	1	23	1	1	2	0	9
ASV_135	0	0	0	0	0	0	0	0	0	0	0	0	18	3	31	10	43	168	64	15	47
ASV_136	0	0	0	0	0	0	0	0	0	0	34	34	66	35	24	13	31	35	37	47	35
ASV_137	4	4	7	6	1	3	9	4	8	5	9	13	21	15	32	4	80	26	47	50	27
ASV_138	0	0	0	0	0	0	0	0	0	14	4	9	19	12	7	27	55	73	57	12	105
ASV_139	34	0	112	114	13	104	12	5	0	0	0	0	0	0	0	0	0	0	0	0	0
ASV_140	0	0	3	0	0	0	0	0	262	0	3	4	1	0	0	0	0	0	0	0	2
ASV_141	0	0	0	0	0	0	0	1	0	96	145	141	0	2	0	0	1	2	0	0	3
ASV_142	0	0	0	0	3	0	1	3	1	12	18	16	57	44	52	41	59	39	17	12	12
ASV_143	8	131	43	35	54	74	12	13	7	0	0	0	0	0	0	0	0	0	0	0	0
ASV_144	0	1	0	0	0	0	0	2	2	23	9	11	108	58	55	58	23	0	5	13	9
ASV_145	61	25	63	59	43	67	14	28	5	0	0	0	0	0	0	0	0	0	0	0	0
ASV_146	0	0	14	10	28	97	86	42	92	0	0	0	0	0	0	0	0	0	1	0	0
ASV_147	0	0	0	0	0	0	9	16	19	23	20	25	31	14	18	23	37	31	26	29	40
ASV_148	0	0	0	0	0	0	4	0	2	3	6	15	48	67	31	38	27	29	24	31	32
ASV_149	0	0	0	0	0	0	0	0	0	6	1	6	44	29	20	36	125	38	21	3	22
ASV_150	0	0	2	0	0	0	0	0	22	21	24	81	23	17	13	46	35	27	21	4	12
ASV_151	272	4	64	14	0	0	0	0	0	0	0	0	1	0	0	0	0	0	0	0	0
ASV_154	0	1	0	0	0	0	0	0	7	41	28	11	29	44	69	33	20	4	19	36	3
ASV_155	0	0	0	0	0	0	2	0	72	6	24	29	26	10	0	21	32	59	17	2	38
ASV_157	0	0	0	0	0	0	0	0	0	26	152	21	8	6	22	12	10	46	14	18	8
ASV_158	0	0	0	0	0	0	0	0	1	5	22	84	21	11	13	24	29	3	73	4	54
ASV_159	0	0	0	0	0	1	0	0	0	0	0	0	15	1	16	2	5	0	2	298	1
ASV_160	0	0	0	0	0	0	0	0	11	40	14	21	33	26	36	38	35	14	22	31	11
ASV_161	0	0	0	0	0	1	0	0	0	50	48	41	50	40	28	33	25	1	4	4	3
ASV_162	0	0	0	0	0	0	0	0	0	4	2	1	84	116	18	30	21	4	26	3	22
ASV_163	0	0	0	0	0	0	0	0	0	44	58	47	40	32	5	13	23	19	21	7	17
ASV_164	1	0	2	0	3	1	0	0	0	129	95	18	19	33	7	11	2	2	1	1	2
ASV_165	0	0	0	0	3	13	38	49	85	71	41	16	0	0	0	0	6	1	0	0	0
ASV_168	0	0	0	0	2	2	9	23	22	49	64	32	25	31	9	27	17	3	0	3	6
ASV_169	85	3	20	18	5	8	36	34	86	8	8	2	2	1	2	2	0	0	0	0	0
ASV_170	0	0	1	0	0	0	0	1	3	24	46	14	17	33	17	15	33	32	29	27	26
ASV_171	16	0	119	45	28	79	34	0	0	0	0	0	0	0	0	1	0	0	0	0	0
ASV_172	319	2	0	0	0	0	0	0	0	0	0	0	0	0	0	0	0	0	0	0	0
ASV_173	0	0	0	0	0	0	0	0	0	0	0	0	0	0	0	3	30	52	34	1	193
ASV_174	0	0	0	0	0	0	0	0	0	10	12	8	64	51	46	46	37	19	5	9	8
ASV_175	0	4	2	2	0	1	3	9	9	107	64	70	11	5	9	6	4	1	1	4	2
ASV_176	0	0	0	0	0	0	1	1	35	8	36	67	18	15	1	7	22	13	52	0	35
ASV_177	0	0	0	0	0	0	0	0	3	1	1	8	13	5	18	25	57	37	31	55	55
ASV_178	0	0	0	0	30	8	105	140	8	1	0	0	2	0	1	1	7	1	1	2	0
ASV_179	0	0	0	0	0	0	7	1	0	2	1	2	21	2	20	9	33	113	20	32	28
ASV_180	0	0	0	0	0	0	0	8	29	146	73	28	2	4	1	6	8	0	0	1	1
ASV_182	64	22	91	50	37	27	1	0	0	0	0	0	0	0	0	0	0	0	0	0	0
ASV_184	0	0	0	0	0	0	0	0	0	1	1	3	28	16	24	41	72	4	8	57	36
ASV_185	0	0	0	0	0	0	0	0	1	66	57	54	42	36	21	15	5	0	0	1	0
ASV_186	4	2	1	0	0	0	0	0	1	2	8	40	78	47	11	16	22	12	4	0	42
ASV_187	0	0	0	0	0	0	0	0	0	1	0	0	2	0	129	0	2	0	0	161	0
ASV_188	1	1	1	1	1	5	10	4	11	4	6	4	6	13	26	9	33	31	43	47	21
ASV_189	0	0	0	0	0	0	1	0	0	0	2	8	14	23	10	10	17	58	64	56	20
ASV_190	17	6	54	34	11	66	52	16	27	0	0	0	0	0	0	0	0	0	0	0	0
ASV_191	15	1	66	44	9	54	32	21	17	4	3	6	9	7	1	0	0	0	0	0	0
ASV_192	0	0	1	2	13	33	99	38	44	49	2	1	0	0	3	0	0	0	0	0	0
ASV_193	0	0	0	0	0	0	0	0	1	7	18	118	23	13	17	25	16	21	1	2	18
ASV_195	1	0	0	1	6	2	37	187	27	1	0	1	2	0	2	1	0	1	0	1	1
ASV_196	0	0	0	0	0	0	0	0	1	0	0	0	1	0	26	1	22	0	0	232	0
ASV_199	0	0	1	1	17	6	80	35	132	0	0	0	0	0	0	0	0	0	0	0	0
ASV_200	0	0	0	0	9	0	99	111	32	1	0	5	0	0	3	11	1	0	0	1	1
ASV_201	0	0	0	0	0	0	1	1	8	9	36	8	30	21	29	10	13	39	23	23	21
ASV_202	0	0	0	0	0	0	1	0	0	7	15	0	48	59	36	32	53	8	5	4	5
ASV_203	0	0	0	3	0	1	67	43	73	6	5	5	2	4	3	2	8	9	7	6	25
ASV_204	0	0	1	12	0	1	17	20	22	28	20	11	30	24	17	16	27	8	5	9	1
ASV_205	0	0	0	11	9	37	86	37	42	2	5	6	0	1	1	2	0	9	0	0	0
ASV_206	0	0	0	0	0	1	1	1	27	19	11	11	26	1	27	24	48	37	9	6	18
ASV_207	0	0	0	0	0	0	0	0	0	0	0	0	69	20	99	68	5	0	0	7	0
ASV_208	0	0	0	0	37	0	18	48	38	23	36	18	10	4	8	0	8	4	3	2	5
ASV_209	0	0	0	0	0	0	0	1	1	13	10	8	33	56	53	26	38	6	0	11	6
ASV_210	0	0	0	0	1	0	0	0	2	4	1	3	25	14	9	18	78	60	20	15	14
ASV_211	0	0	0	0	0	0	0	0	0	0	0	0	14	2	39	39	49	11	61	31	7
ASV_212	0	0	0	0	0	0	0	0	0	0	1	2	3	3	4	14	161	5	8	0	47
ASV_213	3	0	1	1	5	2	6	1	4	21	16	14	15	12	11	26	33	28	18	17	24
ASV_214	0	0	0	0	0	0	0	0	0	0	1	12	17	35	7	45	33	45	40	4	17
ASV_215	30	12	109	35	0	69	1	0	0	0	0	0	0	0	0	0	0	0	0	0	0
ASV_216	0	0	0	0	0	0	1	0	1	17	51	31	42	110	2	0	1	0	0	0	0
ASV_217	0	0	7	58	0	2	3	0	5	4	8	1	69	10	7	5	23	7	27	2	8
ASV_219	0	0	0	0	0	0	0	0	2	98	35	11	24	23	11	45	3	0	0	0	0
ASV_220	0	0	0	0	0	0	0	0	0	0	2	4	2	9	5	22	35	17	66	11	74
ASV_221	0	0	0	0	0	0	0	0	0	25	4	4	20	7	123	44	17	0	1	0	2
ASV_222	0	0	1	2	0	0	9	5	5	8	8	4	31	14	8	21	23	40	27	17	21
ASV_224	0	0	0	0	0	0	0	0	1	14	10	35	13	52	18	9	18	27	24	14	8
ASV_225	0	0	0	0	0	0	0	0	0	0	0	0	6	35	28	84	26	15	18	27	1
ASV_226	0	0	0	0	3	2	1	2	3	14	19	15	23	35	32	13	30	18	14	9	8
ASV_227	43	4	32	23	24	65	35	11	0	0	0	0	0	0	0	0	0	0	0	0	0
ASV_228	0	0	0	0	0	0	0	0	0	0	0	0	0	0	14	0	13	2	0	212	0
ASV_230	0	0	0	0	0	0	0	0	0	41	21	21	32	36	20	33	24	2	1	0	4
ASV_231	0	0	0	1	1	4	0	3	0	18	14	22	36	55	8	25	15	10	9	2	11
ASV_232	0	0	0	0	0	0	0	0	0	0	0	9	15	5	7	55	44	22	47	0	25
ASV_233	0	0	0	0	0	0	0	0	0	0	19	11	16	7	7	20	48	38	37	3	27
ASV_234	1	0	0	0	0	0	12	22	75	62	25	2	4	3	1	0	9	0	1	4	5
ASV_236	0	0	0	0	0	0	0	0	0	0	1	27	31	55	55	33	8	0	2	16	4
ASV_237	1	0	0	0	0	0	0	0	0	28	11	29	7	84	44	13	9	1	0	1	0
ASV_238	0	0	4	11	5	27	52	47	40	9	10	5	0	0	0	1	1	7	4	0	4
ASV_239	0	0	0	0	0	0	0	0	0	2	0	4	33	10	25	9	54	32	23	15	13
ASV_240	0	0	0	0	0	1	29	13	30	94	6	8	4	20	5	9	3	2	2	0	1
ASV_242	0	0	0	0	0	0	0	0	0	35	36	37	5	12	2	11	4	3	43	1	32
ASV_243	0	0	0	0	0	0	3	0	7	2	3	1	13	11	9	20	40	49	24	15	19
ASV_244	0	0	0	0	0	0	0	0	0	0	3	22	1	5	1	0	12	122	46	2	2
ASV_245	0	0	0	0	0	0	0	0	4	0	3	1	21	26	8	20	54	36	18	1	26
ASV_246	0	0	0	0	0	0	0	0	0	0	0	0	20	4	52	7	0	0	0	139	0
ASV_247	0	0	0	0	0	0	0	0	0	0	0	7	7	3	4	21	33	127	6	8	1
ASV_248	1	0	2	4	0	0	1	2	7	10	36	32	15	22	16	6	8	26	8	1	16
ASV_250	4	58	41	22	36	41	8	5	0	0	0	0	0	0	0	0	0	0	0	0	0
ASV_254	0	0	0	0	0	0	0	0	0	1	0	1	0	2	3	29	32	63	21	4	49
ASV_255	24	0	45	77	4	1	1	10	1	0	4	1	3	4	4	8	2	1	5	2	5
ASV_257	0	0	0	0	1	0	0	0	9	16	15	16	20	37	34	9	3	7	11	20	10
ASV_258	0	0	0	0	0	0	1	0	13	21	17	4	24	14	17	11	17	46	5	8	11
ASV_259	0	0	0	0	0	0	0	0	1	0	2	12	26	24	20	35	25	24	12	9	15
ASV_262	0	0	2	1	1	0	1	1	2	21	23	16	12	43	9	32	11	8	11	10	1
ASV_264	0	0	0	0	0	0	22	13	21	1	0	0	1	4	28	11	10	11	4	61	16
ASV_265	0	0	0	0	0	0	1	0	2	45	37	20	23	27	18	9	5	4	10	0	2
ASV_266	0	0	0	0	0	0	0	5	23	1	7	8	11	29	4	24	24	13	17	2	34
ASV_267	0	0	1	1	3	11	66	107	4	3	0	0	0	0	2	0	0	0	1	0	0
ASV_268	0	0	0	0	0	0	0	0	0	4	9	31	29	8	26	19	24	31	9	8	4
ASV_269	0	0	2	1	4	3	27	58	35	7	3	22	5	0	2	0	10	2	6	1	7
ASV_270	1	0	0	7	8	19	47	23	51	16	22	3	2	0	0	1	0	0	0	0	0
ASV_271	0	0	0	0	0	0	0	0	12	8	4	2	31	10	24	46	54	1	2	3	5
ASV_272	0	0	0	0	0	0	0	0	1	0	0	0	0	2	0	199	0	0	0	0	0
ASV_273	0	1	0	0	0	0	0	0	0	6	2	9	4	11	9	8	15	35	41	8	48
ASV_274	1	0	3	12	32	121	1	1	0	8	5	1	4	0	8	0	0	0	0	0	0
ASV_275	0	0	0	0	0	0	0	0	0	0	0	0	0	0	58	1	11	0	1	126	0
ASV_276	14	3	85	51	2	1	0	6	0	0	1	0	13	0	0	0	0	0	10	2	0
ASV_277	0	0	0	0	0	0	0	0	0	32	12	2	48	8	35	4	9	7	7	20	7
ASV_278	0	0	0	0	0	0	1	1	0	0	0	0	0	0	0	7	16	65	68	4	33
ASV_280	0	0	0	0	0	0	0	0	1	35	5	1	13	3	13	14	51	26	12	12	7
ASV_281	0	0	0	0	0	0	0	0	0	0	4	6	32	1	14	23	13	58	10	1	29
ASV_283	0	0	0	0	0	0	0	0	1	10	17	7	15	22	21	22	18	7	21	14	13
ASV_284	0	0	0	0	0	0	0	0	1	1	1	1	11	2	0	1	17	90	34	9	16
ASV_285	191	0	0	0	0	0	0	0	0	0	0	0	0	0	0	0	0	0	0	0	0
ASV_286	0	0	0	0	0	0	0	0	0	20	3	3	41	57	43	13	2	0	1	7	1
ASV_287	2	0	0	0	0	0	0	16	43	33	27	17	0	4	0	3	9	9	12	0	10
ASV_288	0	0	0	0	0	0	5	29	0	16	38	1	15	35	25	5	1	0	2	15	1
ASV_289	0	0	2	6	1	4	14	16	10	7	2	6	10	8	11	10	23	16	10	25	3
ASV_290	0	0	0	0	0	0	0	0	0	2	1	16	5	2	1	2	9	28	37	5	77
ASV_291	0	0	0	0	0	1	2	0	0	1	2	4	6	4	13	5	18	36	27	7	55
ASV_293	0	0	0	0	1	2	4	4	4	20	64	20	17	29	9	3	0	1	0	0	6
ASV_294	0	0	0	0	0	0	0	0	0	1	0	4	41	47	47	14	11	3	3	5	3
ASV_295	2	5	29	25	38	61	17	1	0	0	0	0	0	0	0	0	0	0	0	0	0
ASV_296	2	3	3	0	23	3	8	2	24	3	22	2	4	2	8	4	17	8	7	7	27
ASV_297	0	0	0	0	0	0	0	0	0	3	8	8	13	6	30	3	15	49	12	13	15
ASV_298	0	0	0	0	0	0	0	0	0	0	3	7	15	15	1	11	52	21	16	5	31
ASV_299	0	0	0	0	0	0	1	1	0	0	4	13	49	7	22	11	26	2	5	14	19
ASV_301	0	0	0	0	0	0	0	0	1	0	3	7	11	1	22	5	22	13	23	37	29
ASV_302	0	0	0	0	0	0	0	0	0	0	0	0	0	0	0	1	50	22	57	2	37
ASV_303	0	0	0	0	0	0	0	0	0	0	0	0	0	2	58	11	19	18	27	38	4
ASV_305	0	0	0	0	0	0	0	0	0	0	1	46	5	15	0	4	5	16	61	5	18
ASV_306	0	0	0	0	0	0	0	0	1	2	3	0	28	9	11	4	22	29	42	12	13
ASV_307	0	0	0	0	0	0	0	0	0	0	0	0	2	1	51	4	40	5	32	16	27
ASV_308	2	0	8	9	4	2	21	10	14	20	7	8	9	5	9	9	9	9	6	8	4
ASV_309	0	0	0	1	0	4	0	2	1	1	0	0	40	27	95	2	0	0	0	4	0
ASV_310	0	0	2	0	0	0	3	13	11	19	3	19	25	51	0	0	16	14	0	0	0
ASV_311	12	1	21	45	22	56	0	4	0	0	0	0	0	10	0	0	0	1	0	0	0
ASV_312	0	0	0	0	0	1	10	6	19	7	11	20	13	1	9	2	26	12	16	10	4
ASV_313	1	0	0	0	0	3	0	115	13	28	0	3	2	0	0	2	0	3	2	1	0
ASV_314	0	0	0	0	1	1	1	4	1	6	3	0	12	7	16	7	17	18	26	25	23
ASV_315	0	0	0	1	0	0	0	0	0	7	2	2	27	101	17	15	0	0	0	0	0
ASV_316	0	0	0	0	0	0	0	0	1	54	41	7	20	14	10	8	2	3	1	5	6
ASV_318	0	3	1	2	2	4	12	13	20	1	2	7	2	0	7	7	25	16	11	25	4
ASV_319	3	3	3	2	0	3	12	13	6	3	8	6	26	13	12	14	13	19	5	0	5
ASV_321	0	0	0	0	0	0	0	0	6	3	17	31	11	30	0	14	22	7	12	0	13
ASV_322	14	14	13	36	11	64	3	3	0	0	0	2	2	0	0	0	0	0	0	0	0
ASV_323	0	0	0	0	0	0	0	0	0	0	0	1	56	57	15	21	13	2	0	1	0
ASV_324	0	0	0	0	0	0	0	0	4	25	29	22	28	49	0	5	1	0	2	0	1
ASV_325	38	9	13	18	5	20	23	16	8	4	0	1	0	0	0	1	3	0	0	0	0
ASV_326	0	0	0	0	0	0	0	0	2	1	6	10	34	37	10	12	7	14	20	2	9
ASV_327	0	0	0	0	0	0	0	0	0	2	12	29	7	12	2	22	20	1	10	0	44
ASV_328	0	0	0	0	0	0	0	0	1	0	0	0	23	1	31	15	16	14	19	35	10
ASV_329	0	0	0	0	0	2	5	0	0	2	4	2	18	11	56	14	11	2	9	15	15
ASV_330	0	0	0	0	0	0	0	0	0	21	6	3	39	20	15	42	5	0	3	2	10
ASV_331	0	0	0	0	0	0	0	0	0	0	1	14	32	27	17	23	11	10	10	11	6
ASV_332	0	0	0	0	0	0	0	0	0	0	0	0	3	1	1	1	8	0	27	13	101
ASV_334	0	0	0	0	0	1	0	0	2	9	10	4	10	4	10	9	30	15	12	27	15
ASV_335	1	0	1	0	0	0	0	0	2	30	37	8	12	14	12	21	7	6	4	3	5
ASV_336	0	0	0	0	0	0	0	0	1	0	0	0	7	23	86	6	3	2	11	23	2
ASV_337	0	0	0	0	0	0	0	0	2	33	15	9	13	6	4	4	20	16	10	2	26
ASV_340	0	7	10	4	42	67	22	3	0	0	0	0	0	0	0	0	0	0	0	0	0
ASV_341	3	0	0	0	0	0	0	0	1	7	7	9	6	16	21	19	22	17	7	10	10
ASV_342	0	0	0	0	0	0	0	0	0	0	0	0	4	0	8	7	27	19	27	34	23
ASV_344	0	0	0	0	0	0	0	0	0	0	1	7	11	9	2	6	32	26	9	24	20
ASV_345	0	0	0	0	0	0	0	0	0	0	0	0	1	1	1	1	34	0	20	95	1
ASV_346	0	0	0	0	0	0	1	2	6	1	0	3	18	15	13	9	29	31	7	3	11
ASV_347	0	0	0	0	0	0	0	1	0	110	1	0	39	1	0	0	0	1	0	2	0
ASV_348	0	0	0	6	16	50	11	10	0	1	3	1	11	0	15	3	7	1	4	4	3
ASV_349	0	0	0	0	0	0	2	61	68	18	0	0	0	0	0	0	0	0	0	0	0
ASV_351	0	0	0	0	3	3	8	6	10	26	22	29	8	17	4	0	1	0	8	0	2
ASV_352	0	0	0	0	0	0	0	0	0	2	5	0	10	4	10	19	7	2	19	12	61
ASV_353	0	0	0	0	0	0	0	0	0	0	1	12	25	26	11	18	20	2	14	6	13
ASV_354	0	0	0	0	0	0	0	0	1	0	13	14	7	12	1	5	22	24	35	0	18
ASV_355	10	4	19	6	20	54	18	13	3	0	0	0	0	0	0	0	0	0	1	0	0
ASV_357	0	0	0	0	0	0	0	0	0	1	0	4	1	22	1	9	13	21	62	1	15
ASV_358	0	0	0	0	0	0	19	14	4	0	0	2	0	9	0	1	6	27	46	2	14
ASV_359	0	0	0	0	0	0	0	0	2	37	14	6	7	9	1	13	4	27	17	3	10
ASV_361	0	0	0	0	0	0	0	0	0	0	2	0	0	0	1	2	5	3	2	133	3
ASV_363	0	0	0	1	0	0	5	9	9	9	11	20	12	9	7	7	16	10	13	2	10
ASV_364	0	0	0	0	3	13	18	8	4	6	5	6	5	0	12	12	12	16	3	2	17
ASV_366	0	0	0	0	0	0	3	1	6	18	23	29	8	10	0	2	5	4	20	2	15
ASV_367	0	0	0	0	0	0	0	0	0	6	2	10	4	6	7	10	20	14	38	3	19
ASV_370	5	0	11	50	3	7	7	18	10	2	3	4	5	1	1	0	6	4	1	1	0
ASV_371	32	10	38	13	4	2	4	4	8	2	0	0	2	0	2	2	3	1	5	3	5
ASV_372	2	1	0	2	0	0	3	5	16	11	13	5	7	7	14	6	8	8	13	13	11
ASV_373	0	0	0	0	0	0	0	18	39	27	16	21	0	0	0	0	2	2	14	0	5
ASV_374	0	0	0	0	0	0	0	0	1	35	16	12	16	7	15	20	8	3	5	5	1
ASV_375	0	0	0	0	0	0	0	0	0	1	0	0	13	0	47	2	18	4	5	54	0
ASV_377	0	0	0	0	0	0	1	0	2	87	19	7	9	0	1	12	2	1	1	0	3
ASV_378	0	1	1	2	9	11	2	8	6	3	3	3	8	12	1	5	15	18	22	0	11
ASV_381	0	0	1	2	0	0	33	7	34	8	7	1	2	0	0	1	4	24	5	0	12
ASV_382	0	0	1	0	0	0	0	0	0	5	18	22	23	9	10	12	12	7	5	3	9
ASV_383	120	21	0	0	0	0	0	0	0	0	0	0	0	0	0	0	0	0	0	0	0
ASV_384	0	0	0	0	0	0	0	0	0	29	31	3	8	14	14	18	5	8	2	2	7
ASV_386	10	1	15	26	16	14	12	13	10	0	1	3	1	1	1	0	4	1	1	3	3
ASV_387	34	0	34	25	0	13	0	3	3	5	9	9	0	2	0	0	0	0	0	0	0
ASV_388	0	0	0	0	0	0	0	0	0	0	3	19	24	41	13	11	15	1	2	7	1
ASV_389	0	0	0	0	0	0	11	1	8	5	3	5	2	1	53	16	7	9	3	8	2
ASV_391	0	0	0	0	0	0	0	2	3	2	5	17	2	0	1	1	7	7	71	2	14
ASV_392	0	0	0	0	0	0	0	0	0	0	0	0	12	26	32	22	18	4	2	18	1
ASV_393	136	0	0	0	0	0	0	0	0	0	0	0	0	0	0	0	0	0	0	0	0
ASV_394	0	0	0	0	0	1	3	9	22	16	8	0	13	11	23	6	6	0	4	11	0
ASV_395	0	0	0	0	0	0	10	11	13	12	2	14	11	5	4	5	18	15	4	1	4
ASV_398	2	0	0	1	2	0	0	3	2	1	5	1	3	7	13	3	14	9	18	36	11
ASV_399	0	0	0	0	0	0	0	0	1	1	1	4	3	1	12	30	15	20	22	4	17
ASV_400	0	0	0	0	0	0	0	0	0	0	0	0	6	30	67	15	3	5	2	4	1
ASV_401	0	2	4	5	1	2	23	13	28	17	7	11	7	3	0	1	0	0	0	0	6
ASV_402	0	0	0	0	0	2	0	0	0	0	1	4	5	11	3	11	74	16	0	1	4
ASV_403	0	0	0	1	0	0	0	0	2	0	0	93	34	0	0	1	1	0	0	0	0
ASV_404	0	0	0	0	1	1	2	3	1	3	3	6	8	11	7	4	32	16	14	8	6
ASV_405	0	0	0	0	0	0	0	0	0	0	0	0	0	0	1	0	2	56	23	0	45
ASV_406	0	0	0	0	0	0	0	0	0	0	1	0	0	2	0	1	20	83	21	0	2
ASV_407	0	0	0	0	0	0	0	0	0	0	0	8	31	19	53	8	3	3	0	5	0
ASV_408	0	0	0	0	0	0	0	0	0	1	1	0	11	3	21	9	11	29	16	10	14
ASV_409	0	0	0	0	0	0	0	0	0	0	0	1	10	4	22	13	2	2	3	53	18
ASV_410	0	0	0	0	2	0	0	0	0	1	2	5	6	4	3	3	27	15	17	10	29
ASV_411	0	0	0	0	0	0	0	0	7	4	0	0	1	0	2	7	44	13	27	4	13
ASV_412	0	0	0	0	0	0	2	0	2	1	0	0	28	0	18	64	1	0	1	7	2
ASV_414	0	0	0	0	0	0	0	0	0	0	1	1	7	1	16	6	22	23	12	16	18
ASV_415	0	0	0	0	0	0	0	0	0	0	0	1	6	3	3	12	18	22	14	22	21
ASV_416	0	0	0	0	0	0	0	0	0	0	10	12	5	0	10	10	27	7	16	5	21
ASV_418	0	0	0	0	0	0	1	0	0	0	2	12	4	5	11	8	13	13	29	15	10
ASV_419	0	0	0	0	0	0	0	0	0	4	2	4	2	13	18	10	15	11	12	26	8
ASV_421	6	0	3	16	6	3	7	6	10	5	1	2	10	3	2	4	8	4	7	14	6
ASV_422	2	3	13	10	17	14	21	18	10	0	0	0	0	0	0	0	0	0	0	0	1
ASV_423	0	0	1	0	0	1	3	6	2	18	19	28	0	1	6	5	15	9	5	1	2
ASV_424	3	0	0	3	4	5	53	44	3	0	1	1	2	0	0	0	0	0	0	1	0
ASV_425	0	1	0	4	0	0	19	21	9	7	0	3	5	14	8	10	3	7	2	2	3
ASV_426	3	0	1	6	13	28	27	37	0	0	0	0	0	0	0	0	1	1	0	0	0
ASV_427	0	0	0	0	0	0	0	0	1	1	0	4	4	0	39	4	17	17	10	15	10
ASV_428	0	0	0	0	0	0	0	0	1	0	2	4	2	6	4	5	9	39	13	21	12
ASV_429	0	0	0	0	0	0	0	0	2	13	38	14	19	10	1	20	0	3	0	0	0
ASV_430	0	0	0	4	3	0	0	0	3	5	5	14	1	3	1	4	17	21	15	5	8
ASV_431	0	0	0	1	0	0	0	0	0	0	0	0	7	2	14	40	26	5	0	20	3
ASV_432	0	0	0	0	0	0	4	1	6	10	12	16	35	14	4	6	2	1	6	0	4
ASV_434	0	0	0	5	5	1	4	5	7	0	1	6	5	2	4	1	10	4	14	31	14
ASV_435	0	0	0	0	0	0	0	0	0	0	0	0	0	1	2	5	43	9	2	3	53
ASV_437	0	0	0	0	0	0	0	0	0	7	9	17	6	10	1	11	11	28	5	1	8
ASV_438	0	0	0	0	0	0	0	0	0	0	0	0	0	1	0	0	2	55	36	0	24
ASV_439	0	0	0	0	0	0	0	0	1	29	21	23	1	6	1	4	1	10	14	0	7
ASV_440	3	2	0	0	0	2	2	4	5	7	1	4	9	7	10	3	7	13	6	27	5
ASV_441	0	0	0	0	0	0	0	0	0	0	1	0	2	1	0	2	47	39	14	3	8
ASV_442	34	5	20	15	0	0	0	5	0	7	0	3	9	3	1	2	1	2	6	2	0
ASV_443	29	17	12	15	2	9	3	2	3	0	0	1	0	1	4	0	2	0	0	5	1
ASV_444	0	0	0	12	0	16	43	35	3	0	1	0	0	0	2	0	1	0	0	2	0
ASV_445	0	0	0	0	0	0	0	1	7	6	12	19	9	26	3	8	7	5	5	1	8
ASV_447	0	0	0	0	0	0	0	0	1	3	2	0	34	19	7	8	4	5	9	1	25
ASV_448	0	0	0	0	0	0	0	0	3	23	23	19	6	4	8	12	11	5	1	1	2
ASV_449	48	12	25	19	2	7	0	0	0	0	0	0	0	0	0	0	0	0	0	0	0
ASV_451	0	0	0	10	4	29	32	3	7	8	1	2	1	4	0	0	4	0	2	0	9
ASV_452	0	0	0	0	0	0	0	0	0	0	1	0	2	3	37	1	14	2	0	56	0
ASV_454	4	1	8	11	6	5	8	22	8	0	0	0	2	2	7	0	10	5	2	6	4
ASV_455	0	1	0	0	0	0	0	0	0	5	35	18	30	15	2	0	0	0	3	0	6
ASV_456	0	0	0	0	0	0	0	0	0	0	0	0	51	1	21	24	7	0	0	11	0
ASV_457	0	0	0	0	0	0	0	0	0	3	1	9	13	3	1	3	14	22	35	2	5
ASV_458	5	3	9	4	8	3	8	1	8	6	3	1	5	6	3	9	10	9	1	4	5
ASV_459	0	6	6	1	34	4	0	30	1	0	0	12	0	0	0	2	5	3	0	0	0
ASV_460	0	0	0	0	0	0	0	1	0	0	0	0	1	1	0	1	4	35	22	8	36
ASV_461	0	0	2	1	0	2	1	2	0	6	8	11	12	8	5	27	8	11	2	3	3
ASV_462	0	0	0	0	0	0	0	0	0	0	0	2	3	1	5	1	25	43	11	5	16
ASV_463	0	0	0	0	3	0	4	1	6	4	6	4	4	11	6	3	11	10	18	8	13
ASV_464	4	0	5	7	0	18	8	4	4	0	10	3	5	0	4	8	2	6	4	5	11
ASV_465	5	1	2	2	6	0	7	1	2	3	5	2	21	6	5	1	9	5	9	12	6
ASV_466	0	0	0	0	0	0	0	0	0	0	5	11	36	29	28	2	0	0	0	0	0
ASV_467	0	0	0	0	0	0	2	2	26	7	8	4	6	1	9	1	10	10	11	5	6
ASV_468	0	0	0	0	0	0	0	0	0	4	1	0	4	0	71	11	6	1	3	10	1
ASV_469	0	8	0	7	4	4	0	2	0	1	2	9	30	12	7	8	9	0	3	0	1
ASV_470	0	0	1	0	4	0	20	12	5	2	1	2	4	11	4	2	10	6	15	6	5
ASV_471	0	0	0	0	0	1	4	3	3	15	16	7	7	4	13	2	14	1	9	8	4
ASV_472	0	0	0	0	0	0	0	0	0	0	0	1	11	4	27	4	0	0	0	64	0
ASV_475	0	0	0	0	0	0	0	0	0	0	1	5	1	4	0	8	7	31	20	4	26
ASV_476	0	0	0	0	0	0	0	0	0	4	26	39	1	3	0	4	5	2	14	0	11
ASV_477	0	0	1	0	19	9	12	27	27	1	5	4	2	0	0	0	0	0	0	0	0
ASV_478	0	0	0	0	0	0	0	0	0	0	0	1	4	7	21	2	16	25	24	2	4
ASV_479	0	0	0	0	0	0	2	2	0	0	0	0	2	0	10	4	19	16	24	6	15
ASV_480	0	0	0	0	0	0	0	0	0	0	0	1	2	0	2	0	1	0	3	98	1
ASV_482	0	0	0	0	0	0	0	0	3	19	30	52	0	2	0	1	0	2	0	0	0
ASV_484	0	0	0	0	0	0	0	0	0	0	0	2	29	19	2	21	8	5	7	3	8
ASV_486	0	0	0	0	0	0	0	0	0	0	0	0	12	8	28	10	10	0	4	35	1
ASV_487	2	0	0	0	0	2	15	13	22	4	12	0	0	0	0	1	0	9	7	0	17
ASV_488	0	0	0	0	0	0	0	0	0	0	1	0	0	0	1	0	19	16	7	0	56
ASV_491	0	0	0	0	0	0	0	0	0	8	16	54	10	13	0	2	0	1	1	1	1
ASV_494	0	0	0	0	0	0	0	0	18	14	6	17	5	23	3	2	0	2	3	5	6
ASV_495	0	0	0	0	0	0	0	0	1	8	9	4	3	9	6	15	9	11	8	7	13
ASV_496	0	0	0	0	0	0	0	0	0	3	0	1	23	9	21	7	11	9	8	12	0
ASV_497	0	0	0	0	0	0	0	0	0	5	7	5	3	2	25	3	14	9	5	20	6
ASV_498	0	0	0	0	0	0	0	0	0	0	0	0	0	2	0	0	2	3	62	20	14
ASV_499	1	0	0	0	0	1	0	2	3	14	6	1	13	2	13	9	13	6	9	9	2
ASV_500	1	0	2	3	1	7	2	1	1	2	1	5	11	5	8	5	5	4	14	15	12
ASV_501	0	0	0	1	0	4	7	13	15	7	14	7	2	2	0	6	4	5	4	1	8
ASV_502	0	0	0	0	0	0	0	0	0	4	8	8	22	23	12	6	4	2	2	2	10
ASV_503	0	0	0	0	0	0	0	0	0	0	0	1	0	0	0	0	42	22	17	17	0
ASV_504	1	0	0	0	0	0	0	0	7	6	7	5	11	8	7	7	9	15	5	4	12
ASV_506	0	0	0	0	0	0	0	0	0	6	4	12	10	3	0	2	9	15	35	0	8
ASV_511	0	0	0	0	0	0	0	0	0	0	2	1	22	9	22	5	4	6	18	3	10
ASV_512	4	16	37	16	11	15	3	0	1	0	0	0	0	0	0	0	0	0	0	0	0
ASV_513	0	0	0	0	21	1	9	17	32	0	0	0	0	0	0	2	0	3	5	1	2
ASV_514	0	0	0	0	0	0	2	3	6	0	10	6	6	11	14	5	8	5	10	9	5
ASV_515	0	0	0	19	10	46	10	7	1	6	3	0	0	0	0	0	0	0	0	0	0
ASV_516	0	0	0	0	0	0	0	0	0	0	0	0	12	3	17	28	8	0	0	23	9
ASV_517	0	0	0	0	1	0	0	8	18	8	6	14	3	1	2	4	11	0	7	0	16
ASV_518	7	2	1	4	4	1	5	2	2	3	8	5	8	5	7	8	5	7	2	6	6
ASV_519	0	0	1	3	50	0	3	28	9	0	0	0	0	0	0	0	0	0	0	0	0
ASV_520	0	0	0	0	0	0	15	8	15	12	2	7	9	13	0	0	12	5	0	0	0
ASV_521	0	0	0	0	0	0	0	0	0	1	0	18	0	1	2	3	10	6	32	0	26
ASV_523	0	0	0	0	0	0	0	0	20	13	17	17	1	2	0	0	13	5	8	4	0
ASV_524	0	0	0	0	0	0	0	0	5	0	1	13	10	5	2	1	14	12	26	2	9
ASV_525	0	0	0	0	0	0	1	0	0	0	0	2	18	0	0	0	10	26	3	39	1
ASV_526	1	0	0	1	0	0	0	0	0	2	1	1	3	1	38	2	11	1	2	30	2
ASV_527	3	2	5	6	2	3	17	7	7	2	5	1	2	3	1	4	8	10	4	1	3
ASV_529	6	1	17	13	10	12	25	3	0	2	6	2	0	0	0	0	0	0	0	0	0
ASV_531	0	0	0	2	2	0	2	1	0	6	3	1	11	8	9	3	4	6	6	22	10
ASV_532	0	0	0	0	0	0	2	0	6	13	0	3	4	3	4	10	13	23	5	1	9
ASV_534	0	0	0	0	0	0	0	0	0	3	5	1	6	5	28	11	13	3	1	15	6
ASV_535	0	0	0	0	0	0	0	0	17	3	16	3	11	9	4	13	4	6	8	0	4
ASV_536	0	0	0	0	0	0	0	1	11	26	15	7	12	6	3	6	2	3	2	0	2
ASV_537	0	0	1	0	1	9	20	18	8	2	0	8	1	1	0	0	3	10	9	0	5
ASV_538	0	0	0	0	0	3	35	49	3	0	0	1	0	0	1	2	3	0	0	0	0
ASV_540	0	0	0	1	0	0	0	0	0	3	2	0	4	3	35	3	13	2	11	17	1
ASV_541	0	1	0	0	0	0	0	1	0	8	0	0	11	37	22	3	3	0	0	11	1
ASV_542	0	0	0	2	0	0	0	0	1	1	1	2	4	6	5	12	11	3	24	4	22
ASV_544	0	0	0	0	0	0	0	0	0	0	0	0	11	42	41	1	1	0	0	2	0
ASV_545	0	0	0	0	0	0	0	0	0	0	0	0	7	1	9	0	12	26	12	30	1
ASV_546	0	0	0	0	0	0	0	0	0	9	2	9	4	1	4	4	14	18	14	3	13
ASV_547	0	0	0	0	1	1	1	4	1	7	11	7	8	7	13	7	4	18	0	1	5
ASV_548	0	0	0	0	0	0	0	0	1	3	3	2	12	6	3	3	4	14	9	0	27
ASV_549	0	0	0	0	0	0	0	0	11	1	8	6	7	3	2	0	5	24	19	3	7
ASV_550	0	0	0	1	0	0	2	5	8	9	4	0	5	4	3	0	16	13	8	11	7
ASV_552	0	0	0	0	0	0	0	97	0	0	0	0	0	0	0	0	0	0	0	0	0
ASV_553	0	0	0	0	0	0	0	0	0	0	0	2	12	17	20	22	3	11	8	1	1
ASV_554	0	0	0	0	0	0	0	0	0	0	0	0	0	0	3	0	0	0	0	94	0
ASV_556	0	0	0	0	1	1	1	0	2	2	2	9	4	6	1	3	1	0	46	0	16
ASV_558	0	0	0	0	0	1	0	0	1	2	3	2	2	2	4	1	12	11	12	1	41
ASV_559	0	2	2	8	10	41	6	9	11	0	0	0	0	0	1	0	0	0	0	0	0
ASV_560	0	0	0	0	0	0	3	1	3	3	3	2	6	6	7	2	18	15	3	16	3
ASV_561	0	1	0	0	0	0	0	2	0	6	7	4	5	8	3	7	20	5	9	11	6
ASV_562	21	6	24	15	2	17	7	0	0	0	0	0	0	0	0	0	0	0	0	0	0
ASV_563	10	0	0	8	3	12	3	3	12	0	1	0	1	0	0	0	13	11	3	5	5
ASV_564	0	0	0	4	0	1	13	1	9	1	1	0	1	1	0	0	11	2	5	8	32
ASV_565	0	0	0	1	0	0	0	0	7	9	11	22	12	8	6	5	5	1	5	0	0
ASV_566	0	0	0	0	0	0	0	0	0	0	2	2	8	3	11	3	26	9	12	14	2
ASV_567	0	0	0	0	1	0	8	6	27	1	2	14	0	0	0	3	3	0	5	0	18
ASV_568	8	2	7	10	12	25	14	12	1	0	0	0	0	0	0	0	0	0	0	0	0
ASV_569	0	0	0	0	0	0	4	27	49	1	0	5	0	0	0	0	0	2	0	0	0
ASV_570	0	0	0	0	0	0	0	1	1	3	6	6	10	10	10	1	6	17	5	5	6
ASV_571	0	0	0	0	0	0	0	0	0	0	2	1	7	3	9	11	26	5	18	2	5
ASV_573	0	0	0	0	0	0	0	0	6	2	3	16	2	9	4	1	5	12	12	5	14
ASV_574	0	0	0	0	0	0	1	0	0	0	0	1	14	25	5	3	1	17	5	9	9
ASV_575	0	0	0	0	0	0	0	0	5	1	0	1	8	13	26	2	7	2	1	25	1
ASV_576	0	1	0	0	0	1	0	0	0	0	0	1	33	10	10	12	8	0	0	16	0
ASV_577	0	0	0	0	0	0	0	0	0	0	0	2	1	0	0	2	8	19	40	1	19
ASV_578	27	6	10	6	5	15	1	0	3	0	0	0	0	0	0	0	1	6	2	2	5
ASV_579	0	0	0	0	0	2	2	1	0	5	3	3	2	14	8	11	9	6	10	8	4
ASV_581	0	0	0	0	0	0	0	0	0	0	0	1	0	1	0	3	18	48	6	0	10
ASV_582	0	0	0	0	0	1	1	0	5	4	2	11	12	8	10	2	2	11	14	3	2
ASV_583	0	0	0	0	0	0	1	0	0	1	7	1	4	1	14	3	22	9	15	10	1
ASV_585	0	0	0	0	0	0	1	0	1	3	9	5	2	6	0	3	14	14	13	7	12
ASV_587	0	0	0	0	0	0	0	0	0	0	0	0	20	7	18	46	0	0	0	0	0
ASV_588	0	0	0	0	0	0	0	0	0	0	2	35	9	10	2	1	0	1	1	13	6
ASV_590	0	0	0	0	0	0	0	0	0	0	0	0	1	2	0	4	31	35	5	0	8
ASV_591	0	0	0	1	0	0	0	0	0	0	7	21	1	0	0	0	12	23	11	1	9
ASV_593	0	0	0	0	0	0	0	0	0	1	0	1	3	8	14	13	11	6	8	14	11
ASV_594	0	0	0	0	0	0	0	0	0	0	0	1	4	7	5	3	7	23	11	8	17
ASV_595	0	0	0	0	1	0	48	12	18	1	2	2	0	0	0	0	1	1	0	0	0
ASV_596	0	0	0	0	0	0	0	0	1	7	11	2	10	6	1	4	9	7	8	1	16
ASV_597	41	4	41	1	0	2	0	0	0	0	0	0	0	0	0	0	0	0	0	0	0
ASV_598	5	0	3	8	4	10	8	8	13	18	4	2	2	1	0	2	1	0	0	0	0
ASV_599	0	0	0	0	0	0	0	0	1	5	2	1	15	2	7	10	20	2	5	11	4
ASV_600	0	0	0	0	0	0	0	0	4	0	1	0	3	0	4	12	17	19	11	4	10
ASV_601	0	0	0	0	0	0	0	0	0	0	0	0	1	0	10	2	38	4	1	28	0
ASV_602	0	0	0	0	2	0	1	2	5	4	3	3	2	1	11	0	13	3	9	13	16
ASV_603	0	0	0	0	0	0	5	0	1	27	18	20	5	11	0	0	0	0	0	0	1
ASV_604	0	0	0	0	0	0	0	0	1	0	2	4	4	3	1	3	17	17	14	0	22
ASV_605	0	0	0	2	0	0	5	7	7	4	7	3	4	3	5	5	9	10	9	1	5
ASV_606	0	0	0	0	0	0	0	0	0	0	5	4	16	5	1	1	18	12	6	12	4
ASV_608	0	0	0	0	0	0	0	1	0	0	0	0	8	0	20	54	0	0	0	0	1
ASV_610	6	0	8	6	5	5	23	23	8	0	0	0	0	1	0	0	0	0	0	0	0
ASV_611	4	0	14	15	2	15	20	7	0	0	1	3	1	1	0	0	1	0	0	0	0
ASV_612	0	0	1	1	0	3	3	1	1	5	17	20	2	3	0	3	2	0	19	0	4
ASV_614	0	0	1	0	0	0	0	0	0	3	9	12	13	11	4	6	0	9	1	16	0
ASV_616	0	0	0	0	0	0	0	0	4	0	4	5	0	6	4	1	0	13	12	33	4
ASV_618	0	0	0	1	0	0	3	0	4	2	4	2	15	1	5	5	9	7	6	7	12
ASV_619	0	0	0	0	0	0	0	0	9	19	36	19	0	0	0	0	0	0	0	0	0
ASV_620	0	0	0	0	0	0	0	0	0	0	0	6	0	1	1	9	24	0	3	0	31
ASV_621	0	0	0	0	0	0	0	0	3	0	0	0	4	3	14	4	10	5	8	29	4
ASV_622	0	0	0	0	0	0	0	0	2	0	0	0	4	0	14	26	33	2	1	0	2
ASV_624	0	0	0	0	0	0	0	0	7	1	0	2	21	5	42	2	0	0	0	5	0
ASV_625	0	1	0	0	0	0	0	0	0	0	8	12	10	4	3	1	8	27	3	4	4
ASV_626	0	0	0	0	0	0	0	0	0	0	2	5	4	7	0	1	1	24	7	0	34
ASV_627	0	0	0	0	0	0	0	0	0	0	0	0	8	5	2	3	24	4	20	12	7
ASV_628	0	0	0	0	0	0	0	0	0	3	20	14	16	11	3	5	6	2	0	2	1
ASV_629	0	0	1	0	0	0	1	1	1	0	0	0	0	1	3	0	11	31	13	9	3
ASV_630	0	0	0	0	0	0	0	0	0	0	0	1	0	1	3	5	15	2	35	1	19
ASV_631	0	0	0	1	0	0	0	0	0	2	1	1	21	7	4	2	9	22	1	0	8
ASV_632	0	0	0	0	0	0	0	0	0	0	0	0	10	5	21	16	5	1	0	25	0
ASV_633	24	0	9	2	2	4	0	0	4	2	2	8	4	1	9	2	1	3	0	4	3
ASV_634	0	0	0	2	0	0	5	1	3	6	2	8	12	9	0	6	3	15	2	3	5
ASV_636	0	0	0	1	0	5	14	9	18	10	23	2	1	0	0	0	0	0	0	0	0
ASV_637	0	0	0	0	0	0	0	0	0	0	0	1	32	9	4	34	0	0	0	3	0
ASV_638	0	0	0	1	0	0	0	0	4	0	0	2	4	0	3	2	13	13	14	20	5
ASV_640	0	0	0	0	0	0	0	0	0	1	4	11	7	10	0	8	14	21	1	1	3
ASV_641	0	0	0	0	0	0	0	2	0	3	3	4	11	3	21	17	11	2	0	1	3
ASV_645	0	0	0	0	0	0	0	0	2	0	0	3	9	7	3	6	14	26	7	4	1
ASV_646	2	0	1	0	0	0	0	0	0	1	2	1	3	10	7	4	23	5	4	8	7
ASV_647	0	0	0	2	0	24	27	6	8	0	3	0	1	1	2	0	1	3	0	0	2
ASV_648	0	0	0	0	0	0	0	0	0	0	3	16	0	3	0	1	3	40	10	0	3
ASV_649	0	0	0	0	0	2	2	5	4	3	9	6	4	4	7	2	8	9	5	0	7
ASV_650	0	0	0	0	0	0	0	1	1	0	0	1	1	0	0	0	25	32	11	3	2
ASV_651	0	0	0	0	0	0	0	0	4	4	3	12	0	0	1	4	10	4	10	5	23
ASV_652	0	0	0	0	0	0	1	0	0	9	45	1	4	18	0	1	0	0	0	0	2
ASV_655	0	0	0	0	0	0	0	1	5	3	3	3	5	4	5	2	7	9	4	14	14
ASV_656	0	0	0	0	0	0	0	0	3	11	17	13	1	1	0	1	2	13	11	0	6
ASV_658	0	0	0	0	0	0	0	0	0	0	6	11	23	5	2	3	0	13	4	3	5
ASV_659	0	0	0	0	0	0	1	0	3	3	1	0	19	4	7	7	17	0	0	13	2
ASV_661	0	0	0	0	0	0	0	0	0	2	3	0	13	4	10	2	4	2	3	36	0
ASV_662	1	0	0	4	0	1	1	0	5	0	0	1	1	0	8	1	14	18	13	9	1
ASV_663	0	0	0	0	0	0	2	7	7	1	4	4	2	0	6	3	8	11	11	9	4
ASV_665	0	0	0	0	0	0	6	10	14	32	10	1	0	1	1	1	2	1	1	0	0
ASV_666	0	0	0	0	0	0	0	0	0	4	9	54	0	0	0	0	3	7	2	0	1
ASV_667	0	0	0	0	0	0	0	0	1	0	4	3	24	8	2	8	12	2	0	4	12
ASV_668	0	0	0	0	0	0	2	1	13	6	4	3	7	7	6	2	10	3	1	5	5
ASV_669	0	0	0	0	0	0	0	4	4	30	12	24	1	1	0	0	0	0	0	0	0
ASV_670	1	1	0	0	0	0	0	3	0	4	14	14	7	13	8	2	0	4	1	6	0
ASV_671	0	0	0	0	0	0	0	0	0	1	0	18	12	7	24	5	2	1	1	5	0
ASV_672	0	1	0	1	0	1	0	0	0	3	0	1	18	3	8	3	12	1	12	13	0
ASV_673	0	0	0	0	0	0	0	0	0	0	0	1	2	2	5	40	27	0	0	0	1
ASV_675	0	0	0	0	0	0	0	0	5	2	3	3	2	7	1	32	11	6	1	1	5
ASV_676	0	0	0	0	0	0	0	0	1	0	0	1	7	3	4	2	9	23	25	1	3
ASV_677	0	0	2	0	0	0	0	0	4	0	0	0	0	0	14	1	15	7	1	27	3
ASV_678	0	0	0	0	0	0	0	0	76	0	0	0	0	0	0	0	0	0	0	0	0
ASV_679	0	0	0	0	0	0	0	0	1	15	10	4	6	6	4	7	4	13	5	1	1
ASV_680	0	0	0	0	0	0	0	0	0	1	0	0	2	3	40	30	1	0	0	0	1
ASV_681	0	0	0	0	0	0	0	0	0	0	0	0	0	0	0	1	18	2	32	6	19
ASV_682	0	0	0	0	0	0	0	0	1	0	7	5	8	7	4	6	4	7	9	7	10
ASV_683	28	4	0	1	2	0	5	33	1	0	3	0	0	0	0	0	0	0	0	0	0
ASV_684	0	0	0	1	1	3	2	3	2	2	10	2	3	9	2	5	9	7	9	5	2
ASV_687	0	14	17	15	14	13	0	0	0	0	0	0	0	0	0	0	0	0	0	0	0
ASV_688	9	6	20	14	5	14	6	0	0	0	0	0	0	0	0	0	0	0	0	0	0
ASV_690	0	0	0	3	0	0	1	6	3	10	2	3	3	6	4	5	11	7	3	1	8
ASV_692	0	0	2	12	1	2	12	7	3	1	2	6	3	7	3	4	3	2	1	0	3
ASV_693	0	0	1	0	1	0	1	0	2	0	0	1	2	2	3	2	8	12	16	9	13
ASV_694	0	0	0	0	0	0	0	0	1	0	4	1	0	0	5	12	10	16	11	8	6
ASV_695	3	0	2	5	3	7	7	6	0	3	5	1	2	1	2	2	6	6	6	1	7
ASV_696	1	0	0	1	0	0	0	0	2	3	1	3	2	3	23	3	2	3	2	16	10
ASV_697	0	0	0	0	0	0	0	1	5	3	15	21	1	3	3	0	6	1	9	0	7
ASV_698	0	0	0	0	0	0	0	0	0	2	3	1	3	2	7	4	12	7	15	10	9
ASV_699	0	0	0	0	0	0	0	0	0	0	0	0	2	0	35	2	14	2	3	16	1
ASV_700	41	26	4	0	0	0	0	0	0	0	0	0	0	0	0	1	0	0	0	0	0
ASV_701	10	1	34	13	3	6	2	0	0	0	0	0	0	0	0	0	0	2	0	2	0
ASV_702	0	0	0	1	0	1	0	2	8	1	0	0	0	0	3	1	14	11	15	3	13
ASV_703	0	0	0	0	0	0	0	0	0	1	2	5	6	7	4	5	5	6	20	4	8
ASV_704	0	0	0	0	0	0	0	0	0	0	1	9	1	3	0	1	8	24	23	0	3
ASV_705	0	0	3	1	3	2	14	16	8	8	8	4	1	0	0	1	0	2	1	1	0
ASV_706	0	0	0	0	0	0	0	0	0	13	5	7	23	19	2	1	2	0	0	1	1
ASV_708	0	0	1	12	7	2	2	4	0	4	3	7	2	1	1	1	8	6	4	0	7
ASV_709	0	0	2	0	3	0	3	2	6	5	8	2	0	1	3	5	5	9	5	4	7
ASV_710	0	0	0	3	3	22	10	33	0	0	0	0	1	0	0	0	0	0	0	0	0
ASV_711	0	0	0	0	0	0	25	4	33	2	3	0	0	2	0	1	2	0	0	0	0
ASV_712	0	0	0	0	0	0	0	0	0	0	1	4	9	3	14	4	3	13	2	18	0
ASV_715	0	0	0	0	0	0	0	0	0	0	0	0	4	0	13	2	11	19	2	20	0
ASV_716	0	0	0	0	0	0	0	0	2	0	3	1	0	1	1	3	6	34	14	0	7
ASV_721	0	0	0	0	0	0	0	0	0	5	5	2	0	5	11	2	19	5	11	4	4
ASV_722	0	0	0	0	0	0	0	0	0	0	0	1	10	3	14	0	8	1	9	27	0
ASV_723	5	0	6	11	4	1	4	4	2	3	8	2	3	1	0	2	1	9	0	1	3
ASV_724	0	0	1	2	2	0	16	7	4	0	0	1	2	2	9	5	2	4	6	3	4
ASV_725	4	5	7	4	3	7	3	4	2	0	0	0	2	5	5	0	7	2	3	3	5
ASV_726	0	0	0	0	0	0	10	3	9	0	0	0	2	0	1	1	10	0	17	15	0
ASV_727	0	0	0	0	0	0	0	0	1	2	4	1	6	4	4	10	8	12	7	6	6
ASV_728	18	28	11	3	10	2	0	0	0	0	0	0	0	0	0	0	0	0	0	0	0
ASV_729	0	0	0	3	0	0	0	0	0	23	6	8	3	10	1	5	5	1	3	3	1
ASV_730	6	1	7	5	2	1	4	4	3	2	0	3	2	4	1	3	9	0	2	9	1
ASV_731	0	0	1	0	10	5	41	4	8	0	1	0	0	0	0	0	0	0	0	0	0
ASV_732	0	0	0	0	2	0	0	0	0	9	2	1	4	0	3	16	20	3	5	1	3
ASV_733	1	0	0	0	0	1	5	3	5	2	1	1	0	1	13	2	10	10	4	5	3
ASV_734	0	0	0	0	1	0	0	1	0	0	0	3	1	0	1	5	17	1	23	1	16
ASV_735	0	0	0	0	0	0	0	0	0	4	5	20	1	2	1	0	1	23	8	1	4
ASV_736	1	0	0	1	1	3	6	3	1	9	20	17	3	1	3	0	0	0	0	0	2
ASV_737	0	0	0	0	0	0	0	1	0	4	5	5	24	1	0	3	3	8	6	5	6
ASV_738	0	0	0	2	0	0	4	1	6	5	12	8	5	9	5	4	1	5	1	2	1
ASV_739	0	0	0	0	1	1	16	21	11	1	3	1	5	5	1	0	0	4	0	1	0
ASV_740	0	0	0	20	2	1	0	0	3	0	0	0	2	0	6	3	9	4	0	11	10
ASV_741	0	0	0	0	0	0	0	0	0	0	0	0	2	34	3	29	0	0	0	0	3
ASV_742	0	0	0	0	0	0	0	0	0	2	1	6	10	7	11	7	10	3	2	3	5
ASV_743	3	2	29	11	0	24	1	0	0	0	0	0	0	0	0	0	0	0	0	0	0
ASV_744	5	0	0	0	7	1	0	0	0	3	2	4	11	11	0	0	7	3	5	4	7
ASV_745	0	0	0	0	0	0	1	0	3	6	5	13	0	3	0	2	9	8	8	0	12
ASV_746	0	0	0	0	0	0	0	0	0	0	0	0	0	0	4	3	20	17	11	7	8
ASV_747	26	4	7	3	1	2	0	0	0	3	6	1	1	3	0	0	2	1	2	0	3
ASV_748	0	0	1	0	0	1	0	0	1	0	1	6	5	0	0	5	6	6	7	4	22
ASV_749	0	0	0	0	0	0	1	1	14	7	6	4	4	0	0	1	16	3	9	0	0
ASV_750	0	0	0	0	0	0	0	0	0	1	5	2	5	4	8	10	5	14	5	5	4
ASV_751	0	0	0	0	0	0	0	0	0	0	0	0	0	0	1	0	2	36	16	4	9
ASV_752	0	0	2	0	0	0	0	2	0	3	2	1	4	10	1	8	10	10	5	2	9
ASV_753	0	0	0	0	0	1	1	2	6	1	3	2	1	6	5	3	9	6	10	4	9
ASV_755	0	0	0	0	0	0	0	0	0	0	0	0	20	48	0	0	1	0	0	0	0
ASV_758	0	0	0	0	0	0	0	0	0	0	0	8	4	7	0	2	11	8	11	4	10
ASV_759	0	0	1	0	0	0	0	0	2	28	4	10	5	3	1	2	5	6	0	0	0
ASV_760	0	0	0	2	0	1	0	4	4	7	9	7	4	7	0	2	3	4	4	1	7
ASV_762	0	0	0	0	0	0	0	0	0	0	2	2	2	2	2	2	11	26	8	1	7
ASV_763	0	0	1	0	0	0	0	0	0	0	0	0	0	0	0	0	2	0	1	63	1
ASV_764	0	0	1	0	0	0	4	0	10	3	1	2	8	3	1	4	1	18	8	4	0
ASV_765	0	0	1	0	0	2	0	1	0	2	2	4	4	7	9	6	9	10	1	0	10
ASV_767	0	0	0	0	0	0	0	0	0	68	0	0	0	0	0	0	0	0	0	0	0
ASV_768	0	0	0	0	0	0	0	0	0	0	0	0	0	0	2	11	13	0	0	39	3
ASV_769	2	0	1	12	0	10	12	13	8	0	0	0	0	0	0	0	3	0	0	0	2
ASV_770	0	0	0	1	1	1	1	8	3	2	9	5	4	4	2	2	6	3	2	6	4
ASV_771	0	0	0	1	4	0	8	18	24	1	2	1	0	2	0	1	0	0	0	0	0
ASV_772	0	0	0	4	0	0	3	6	3	10	27	3	0	1	0	3	2	2	0	0	0
ASV_773	0	0	0	0	0	0	0	0	0	0	0	5	3	3	0	5	14	5	11	4	12
ASV_775	0	0	0	0	0	0	0	0	1	0	1	4	6	5	3	5	6	9	7	12	3
ASV_776	6	4	35	0	12	0	0	0	0	0	0	0	0	2	2	0	0	0	0	0	0
ASV_778	0	0	0	0	0	0	0	0	3	13	7	11	9	3	0	2	8	1	3	0	4
ASV_779	0	0	0	0	0	0	0	0	0	1	0	3	2	1	9	3	4	8	3	4	25
ASV_780	0	0	0	1	0	0	0	0	0	1	7	19	0	3	1	7	12	2	3	5	3
ASV_783	0	0	0	0	0	0	6	0	31	2	2	1	3	0	0	2	1	1	5	0	12
ASV_784	0	0	0	0	1	2	0	0	2	1	1	3	4	6	14	1	7	3	4	9	3
ASV_785	0	0	0	0	0	0	0	0	0	1	7	0	11	17	5	1	2	5	5	2	4
ASV_786	0	0	1	1	42	1	1	6	6	0	0	0	2	0	1	0	0	1	0	2	0
ASV_787	10	1	13	4	8	5	3	10	1	1	1	0	0	3	1	1	0	1	1	0	0
ASV_788	0	0	0	0	0	0	3	6	10	4	4	6	2	3	1	5	9	2	2	6	1
ASV_789	0	0	0	0	0	0	0	0	0	4	13	6	6	4	3	3	1	5	0	17	1
ASV_790	0	0	0	0	0	0	0	0	0	0	0	0	0	1	2	7	15	12	6	16	5
ASV_791	1	0	0	1	0	0	4	4	13	1	2	1	4	2	3	2	4	7	5	3	6
ASV_792	0	0	0	0	0	0	0	1	0	0	0	4	6	3	7	4	10	8	7	1	12
ASV_794	0	0	0	0	0	0	0	0	0	1	0	0	0	1	0	0	4	22	9	1	27
ASV_795	0	0	0	0	0	0	0	0	0	8	2	1	13	8	8	3	4	1	1	16	0
ASV_796	0	0	0	0	0	0	0	0	0	17	16	9	5	9	0	5	3	0	0	0	1
ASV_797	0	0	0	0	0	0	0	0	0	0	0	0	11	10	11	14	8	0	2	6	3
ASV_798	0	0	0	0	0	0	0	0	0	0	0	1	6	8	11	39	0	0	0	0	0
ASV_799	0	0	0	0	0	0	1	0	0	0	0	0	2	8	16	8	13	7	2	3	5
ASV_800	1	4	9	8	8	9	4	6	12	0	0	0	0	0	0	1	0	0	0	0	0
ASV_801	0	0	0	0	0	0	1	0	8	0	0	0	4	2	1	2	11	9	10	2	13
ASV_802	1	0	0	3	0	1	0	0	8	21	4	8	9	4	0	0	0	0	1	2	1
ASV_803	0	0	0	0	0	0	0	1	12	2	1	2	1	0	2	0	11	11	6	3	11
ASV_804	0	0	0	0	0	0	1	1	0	2	1	3	3	0	11	3	11	7	15	0	3
ASV_805	0	0	0	0	0	0	0	0	0	0	0	0	0	1	20	17	7	0	6	1	9
ASV_806	0	0	0	0	0	0	0	0	1	2	5	1	7	19	2	5	1	3	6	3	7
ASV_807	0	0	0	0	0	0	0	0	0	4	3	3	6	4	14	12	7	0	2	6	2
ASV_808	0	0	1	2	0	1	1	0	0	3	9	0	9	12	6	1	2	5	3	8	0
ASV_809	3	0	0	2	1	13	1	5	2	2	1	1	1	1	1	0	1	20	4	1	2
ASV_810	0	1	24	10	7	19	0	0	0	0	0	0	0	0	0	0	0	1	1	0	0
ASV_811	0	0	0	0	1	1	4	1	0	1	3	22	1	2	2	0	0	14	4	3	5
ASV_812	0	0	0	0	0	0	0	0	0	0	0	3	10	1	19	29	0	1	1	0	0
ASV_813	0	0	0	0	1	0	1	1	0	0	0	1	9	14	13	4	3	2	5	7	0
ASV_814	0	0	0	4	4	16	9	9	2	2	3	1	1	2	1	3	1	0	0	0	0
ASV_815	0	0	0	3	7	2	1	0	1	3	0	3	3	0	5	1	7	4	3	12	4
ASV_816	0	0	0	0	0	0	0	0	0	0	0	2	3	3	7	4	20	8	5	1	7
ASV_818	0	0	0	1	0	0	0	0	0	3	2	3	5	9	4	5	3	14	6	3	1
ASV_819	0	0	0	0	0	0	0	1	0	3	0	3	5	5	2	1	20	17	1	1	0
ASV_820	0	0	0	0	0	0	1	4	5	5	1	2	4	2	4	5	5	3	10	9	3
ASV_821	0	1	0	0	0	0	0	0	3	7	17	6	7	15	3	0	1	0	0	1	2
ASV_822	0	0	0	0	0	0	0	0	4	1	5	6	7	3	4	5	7	7	3	5	6
ASV_823	23	3	11	9	0	0	1	0	1	1	4	1	0	1	0	1	1	0	1	2	1
ASV_827	0	0	0	0	0	0	0	0	3	7	2	1	2	8	14	4	3	5	2	9	1
ASV_828	0	0	0	0	0	0	0	0	0	0	0	4	5	3	7	0	2	3	15	12	8
ASV_829	0	0	0	0	0	0	0	0	0	0	0	3	0	0	0	0	5	31	14	1	5
ASV_831	0	0	0	0	0	0	0	0	0	5	11	3	1	3	3	2	9	3	5	8	8
ASV_832	0	0	0	0	0	0	0	0	0	0	0	0	0	0	7	2	5	10	6	7	22
ASV_833	1	0	0	10	1	0	15	9	7	0	0	0	0	0	1	1	8	2	2	0	4
ASV_834	0	0	0	0	0	1	0	47	8	1	0	0	5	0	0	0	0	0	0	0	0
ASV_838	3	0	2	2	0	0	1	0	3	4	7	0	5	2	2	2	4	13	2	4	4
ASV_839	5	0	15	10	3	9	0	1	0	2	1	0	1	1	2	0	4	2	0	1	0
ASV_840	0	0	2	1	0	2	8	12	4	0	1	3	1	3	4	2	2	0	3	0	11
ASV_842	0	0	0	0	0	0	1	1	10	1	6	6	7	4	4	2	9	8	0	0	0
ASV_843	2	0	1	19	2	9	1	4	3	0	0	1	1	4	1	0	1	3	1	1	5
ASV_844	0	0	0	0	0	0	1	1	2	7	5	2	0	1	1	17	2	9	4	4	1
ASV_848	0	0	0	0	0	0	0	0	0	4	2	5	2	0	0	22	10	9	0	3	1
ASV_849	0	0	0	0	0	0	0	0	0	0	0	0	1	0	0	0	12	5	21	9	9
ASV_850	0	0	0	0	0	0	2	1	0	4	4	4	3	5	4	4	2	6	9	5	6
ASV_851	0	0	0	0	0	0	0	0	0	0	0	0	2	0	1	33	14	1	3	5	0
ASV_852	0	0	0	0	0	0	0	0	0	0	0	0	0	0	1	7	13	5	13	4	15
ASV_855	0	0	0	0	0	0	0	0	0	0	0	0	3	2	0	1	14	5	16	2	15
ASV_856	0	0	0	0	0	1	0	0	0	0	1	1	0	0	0	1	1	25	9	2	17
ASV_857	0	0	0	2	0	54	0	1	1	0	1	0	0	0	0	1	0	0	0	0	0
ASV_858	0	0	0	0	0	0	1	2	12	2	0	0	4	0	17	5	5	3	5	4	0
ASV_860	0	0	0	0	0	0	0	0	0	1	0	2	11	3	11	5	5	4	9	2	7
ASV_861	0	0	0	0	0	0	0	0	0	0	0	5	12	3	4	4	18	0	6	6	2
ASV_863	0	0	1	2	1	0	1	0	0	1	0	2	4	0	13	7	7	5	4	6	2
ASV_864	0	0	0	0	0	0	0	0	0	0	0	0	1	2	19	5	17	7	1	1	0
ASV_865	0	0	1	2	0	2	10	5	6	7	5	4	0	3	2	2	2	1	1	1	3
ASV_866	1	0	1	2	0	1	0	0	3	2	3	4	7	3	5	4	3	9	2	6	2
ASV_867	0	0	0	0	0	0	0	0	0	0	6	14	0	4	1	8	6	4	10	0	4
ASV_868	0	0	0	0	0	0	1	0	0	11	8	15	3	2	0	0	15	1	1	0	1
ASV_869	0	0	0	0	2	1	17	27	4	0	0	0	0	0	0	0	1	1	0	1	4
ASV_870	0	0	0	3	0	0	0	1	3	1	0	5	1	2	9	4	8	0	11	3	8
ASV_872	0	0	0	0	0	0	0	0	0	0	2	4	23	22	2	6	0	0	0	0	0
ASV_874	0	0	1	3	16	12	7	4	4	0	2	0	0	0	0	0	1	2	0	1	0
ASV_875	0	0	0	0	0	0	0	0	1	3	3	1	6	4	5	4	16	4	1	5	4
ASV_876	0	0	0	0	0	0	0	0	0	1	8	7	6	4	2	5	0	13	3	2	6
ASV_877	0	0	0	0	0	0	0	0	0	0	0	0	3	0	1	1	5	0	0	5	42
ASV_878	0	0	0	2	0	1	4	3	1	1	1	4	6	2	1	3	6	11	4	3	3
ASV_879	0	0	0	0	0	0	0	0	2	1	1	0	5	1	5	0	4	2	1	34	1
ASV_880	0	0	0	0	0	0	0	0	0	0	0	0	0	0	15	29	1	0	0	12	0
ASV_881	0	0	0	0	0	0	0	0	0	7	0	6	3	1	0	1	12	6	13	7	1
ASV_882	0	0	1	1	1	0	3	0	2	1	0	0	1	0	6	7	8	4	7	13	3
ASV_883	0	0	0	3	0	0	1	20	0	1	2	0	1	2	3	0	18	2	0	4	1
ASV_885	6	7	10	12	4	10	1	2	0	0	0	0	0	0	0	0	0	1	0	0	0
ASV_886	0	0	5	4	1	4	14	13	7	1	0	1	0	2	0	0	0	0	1	0	3
ASV_887	0	1	1	2	1	0	0	0	1	0	2	0	0	0	8	6	10	4	1	17	2
ASV_888	0	0	0	0	0	0	0	0	0	49	2	4	0	0	0	1	0	0	0	0	1
ASV_889	0	0	0	0	0	0	0	0	0	0	0	0	1	5	5	15	3	4	7	3	14
ASV_891	0	0	1	0	0	4	5	3	2	1	3	9	2	2	0	1	5	4	9	2	2
ASV_892	0	0	0	0	0	0	0	0	3	1	2	1	11	8	12	3	9	2	1	0	1
ASV_893	0	0	0	0	0	0	0	0	0	0	0	3	10	7	5	7	3	11	3	3	3
ASV_894	0	0	0	0	0	0	0	0	0	0	0	1	4	0	3	0	11	7	5	4	20
ASV_895	1	0	0	0	0	0	0	0	0	0	0	0	0	0	0	0	0	0	4	0	51
ASV_896	0	0	0	0	0	0	1	1	0	2	8	2	7	10	8	6	6	3	0	1	1
ASV_897	0	0	0	0	0	0	0	1	0	0	5	3	2	7	13	0	4	1	3	15	2
ASV_898	0	0	0	0	0	0	0	0	0	5	14	4	8	16	4	4	0	1	0	0	0
ASV_899	0	0	0	0	0	0	0	0	0	1	3	2	4	3	4	6	7	7	8	2	9
ASV_900	0	0	0	0	0	0	0	0	0	0	2	28	1	1	0	0	1	0	14	0	9
ASV_901	0	0	0	0	0	0	0	0	0	0	0	5	1	2	1	2	6	0	20	1	18
ASV_902	0	0	0	0	0	0	0	0	0	0	0	0	5	1	45	5	0	0	0	0	0
ASV_904	9	2	33	8	0	0	0	0	0	0	0	0	0	0	0	0	1	1	0	0	0
ASV_905	0	0	0	0	0	0	0	0	6	5	1	2	8	2	8	3	3	3	4	2	4
ASV_906	0	0	0	0	0	0	0	0	0	0	0	0	3	2	3	7	9	0	3	6	15
ASV_908	0	0	0	0	0	0	1	0	2	0	1	1	0	2	0	4	0	14	6	1	19
ASV_909	0	0	0	0	0	0	0	0	0	0	0	2	0	0	0	0	11	22	3	4	6
ASV_910	12	2	12	12	4	1	1	1	0	0	1	0	0	0	0	0	1	2	2	4	0
ASV_911	0	0	0	0	0	0	0	0	0	10	37	0	0	8	0	0	0	0	0	0	0
ASV_912	0	0	0	0	0	0	0	0	0	7	23	10	3	4	0	0	1	4	3	0	0
ASV_913	0	0	0	0	0	0	1	0	6	1	3	6	8	2	6	4	7	0	1	9	1
ASV_914	0	0	0	0	0	0	1	0	0	1	2	0	3	7	6	16	1	3	1	12	2
ASV_915	3	1	5	3	0	0	2	2	2	1	0	3	2	0	2	3	3	2	4	8	3
ASV_916	0	0	0	0	0	0	0	1	7	3	9	2	6	19	4	1	0	1	0	0	0
ASV_917	0	0	0	1	0	0	20	0	11	0	0	0	0	0	0	1	7	1	1	0	11
ASV_918	0	0	0	0	0	0	0	1	1	1	4	0	0	0	0	0	10	3	16	13	5
ASV_919	0	0	0	1	0	0	1	0	1	2	9	4	2	3	2	4	2	9	6	6	2
ASV_920	1	0	1	4	0	7	26	9	1	0	0	0	0	2	0	0	0	1	0	0	0
ASV_921	0	0	0	1	0	3	0	2	0	2	1	0	1	0	8	0	9	7	6	7	2
ASV_922	2	0	2	2	1	2	21	19	3	0	0	0	0	0	0	0	0	0	0	0	0
ASV_924	0	0	0	0	0	0	0	0	0	0	0	7	0	0	0	5	2	5	7	0	24
ASV_925	0	0	0	0	0	0	0	0	0	0	0	2	13	0	6	0	2	12	3	11	3
ASV_926	0	0	2	2	0	0	1	0	1	6	3	2	10	3	8	3	2	6	1	0	1
ASV_927	0	0	0	0	0	0	0	0	0	0	0	5	1	1	4	3	7	11	5	12	2
ASV_929	1	0	0	3	1	1	0	3	2	7	4	3	2	0	6	0	2	11	0	6	0
ASV_930	0	0	0	1	0	0	0	0	0	1	1	1	2	1	1	1	10	6	11	7	9
ASV_934	0	0	0	0	1	5	2	1	1	0	1	0	1	3	5	2	6	8	4	3	10
ASV_935	0	0	0	0	0	0	1	0	3	2	1	2	8	4	10	4	6	0	3	8	1
ASV_937	0	0	0	0	0	0	0	0	0	0	1	29	2	4	1	4	2	4	2	1	3
ASV_938	0	0	0	0	0	0	0	0	1	0	3	0	3	0	5	4	18	10	3	5	1
ASV_939	0	0	0	0	0	0	0	0	0	0	0	5	7	11	6	1	2	9	6	1	5
ASV_940	0	0	0	0	0	0	0	0	0	0	0	0	6	19	10	2	0	0	0	16	0
ASV_941	0	0	0	0	0	0	0	0	3	0	0	0	12	34	1	0	0	1	0	2	0
ASV_943	0	0	0	0	0	0	0	0	0	0	0	0	0	0	12	0	0	0	0	40	1
ASV_946	0	5	2	0	4	0	2	3	2	0	2	3	0	1	2	2	3	8	8	1	1
ASV_947	0	0	0	0	0	0	6	3	2	2	2	2	5	1	0	0	15	6	4	0	2
ASV_948	0	0	0	0	0	0	0	0	0	0	0	1	10	0	5	2	3	10	6	7	6
ASV_949	0	0	0	0	0	0	0	0	0	2	0	1	4	7	8	8	6	9	3	2	1
ASV_950	0	0	0	0	0	0	0	0	0	1	4	2	4	6	8	10	0	7	2	4	3
ASV_951	1	0	0	0	0	0	0	0	0	0	0	0	3	0	8	3	4	5	2	5	19
ASV_952	0	0	0	0	0	0	0	0	3	2	0	0	12	2	1	0	7	4	2	8	9
ASV_953	0	0	0	0	0	0	0	0	0	0	0	3	7	1	0	6	7	12	7	7	1
ASV_954	0	0	0	0	0	0	0	0	0	0	0	0	0	0	2	0	6	26	7	0	10
ASV_955	0	0	0	0	0	0	0	0	0	2	0	3	1	25	11	0	1	5	2	2	0
ASV_957	0	0	0	0	0	0	5	0	0	1	2	1	3	2	1	0	5	5	4	21	2
ASV_958	0	0	0	0	0	0	0	0	0	0	0	1	13	2	0	0	5	14	9	1	7
ASV_960	0	0	4	5	5	2	9	15	9	0	0	0	0	0	0	0	1	0	0	0	0
ASV_961	4	2	12	5	4	9	4	1	1	0	0	1	0	0	2	1	0	0	1	1	0
ASV_962	0	0	0	0	0	0	7	8	12	12	7	3	0	0	0	0	0	1	0	0	0
ASV_963	1	0	0	0	0	0	1	0	0	8	7	2	2	2	1	7	5	7	1	3	3
ASV_965	0	0	0	1	19	15	3	12	0	0	0	0	0	0	0	1	0	0	0	0	0
ASV_966	0	0	0	0	0	0	0	0	0	2	4	13	8	0	5	9	4	1	2	0	3
ASV_968	0	0	0	0	0	0	0	0	0	5	1	5	3	8	5	8	0	12	0	4	0
ASV_971	0	0	0	0	0	0	0	0	0	0	0	0	0	1	2	0	5	16	3	3	13
ASV_973	0	0	0	0	0	0	0	0	0	0	1	9	0	0	0	0	1	13	20	0	5
ASV_974	0	0	0	0	0	0	0	0	1	1	4	8	3	0	1	1	8	5	9	0	8
ASV_975	0	0	0	0	0	0	0	0	0	0	0	0	2	1	0	7	8	7	7	6	11
ASV_976	0	0	0	0	0	0	0	2	11	0	2	8	0	2	0	1	9	4	5	0	6
ASV_977	0	0	0	0	0	0	0	2	0	2	4	6	4	0	1	1	3	8	6	6	7
ASV_978	0	0	0	0	0	0	0	0	0	4	4	1	7	4	2	3	7	5	4	4	5
ASV_979	0	0	0	0	0	0	0	0	1	0	0	0	0	1	1	0	3	4	2	38	0
ASV_980	0	0	0	0	0	0	0	0	0	5	1	3	4	1	7	7	4	0	2	2	12
ASV_981	0	0	0	1	5	0	5	0	4	1	1	0	4	3	8	2	0	2	0	10	2
ASV_982	0	0	0	0	0	0	0	2	3	7	5	7	1	6	0	1	6	4	5	0	1
ASV_983	0	0	0	0	0	0	0	0	0	0	0	0	4	1	0	0	17	10	4	4	3
ASV_984	0	0	0	0	0	0	0	0	0	8	1	21	0	0	2	0	4	9	0	0	3
ASV_985	0	0	0	0	0	0	0	0	0	0	0	0	1	0	3	4	6	11	10	6	7
ASV_986	0	0	0	3	1	2	0	1	0	2	2	0	5	3	10	1	6	5	2	4	1
ASV_987	0	0	0	0	0	1	2	20	7	1	4	3	1	1	0	2	2	3	1	0	1
ASV_988	0	0	0	0	0	0	0	0	0	1	2	0	4	3	0	2	14	11	3	5	4
ASV_989	0	0	0	0	0	0	0	0	0	0	0	0	1	1	14	0	1	0	0	32	0
ASV_990	0	0	0	0	0	0	0	0	0	0	0	0	0	0	1	5	3	11	10	9	10
ASV_991	2	0	2	6	1	25	0	0	1	0	0	0	0	2	0	3	1	1	1	0	2
ASV_992	0	0	0	2	0	1	0	3	1	3	3	3	4	0	3	3	3	0	0	2	0
ASV_993	12	7	13	0	0	0	0	1	0	0	0	0	1	1	0	0	5	2	0	0	4
ASV_994	0	0	0	0	0	0	1	3	1	2	4	5	3	2	5	6	5	4	4	0	1
ASV_995	0	0	0	0	0	0	2	0	9	1	3	2	3	2	1	1	4	3	2	8	6
ASV_996	3	0	0	0	0	0	0	3	0	2	1	1	2	3	1	2	7	1	7	12	2
ASV_997	0	0	0	0	0	0	0	0	0	2	0	1	5	0	5	2	10	14	4	0	2
ASV_998	0	0	0	0	0	0	0	0	0	0	0	0	1	0	10	6	13	1	0	16	0
ASV_1000	0	0	0	0	0	0	0	0	0	1	1	2	6	1	13	1	8	3	5	2	2
ASV_1001	0	0	0	0	0	0	0	1	1	1	1	0	0	2	1	2	3	20	2	6	7
ASV_1002	0	0	0	0	0	0	0	0	4	0	0	2	4	2	3	1	11	5	4	6	5
ASV_1003	0	0	0	0	0	0	0	1	1	3	7	6	5	1	8	2	2	10	1	0	0
ASV_1004	36	10	1	0	0	0	0	0	0	0	0	0	0	0	0	1	0	0	0	0	0
ASV_1005	0	0	0	0	0	2	0	0	3	11	5	8	0	0	0	0	4	3	4	1	7
ASV_1006	0	0	0	0	0	0	0	0	0	7	1	5	7	18	8	0	0	0	0	2	0
ASV_1007	0	0	0	0	0	0	0	0	0	11	5	1	7	7	0	5	4	2	4	0	2
ASV_1008	0	0	0	0	0	0	0	0	0	0	1	3	0	5	5	1	4	12	2	4	11
ASV_1009	0	0	0	0	0	0	1	0	3	0	0	1	1	3	3	8	3	3	3	14	5
ASV_1010	0	0	0	0	0	1	0	0	0	0	0	0	10	1	9	6	2	2	1	12	4
ASV_1012	1	1	7	5	5	8	8	5	3	1	0	1	0	0	0	0	0	0	0	1	0
ASV_1013	0	0	0	0	0	0	1	0	1	1	2	2	3	0	11	1	1	13	6	0	4
ASV_1014	0	0	0	0	0	0	0	0	32	0	0	0	2	0	1	0	1	3	6	0	0
ASV_1015	0	0	0	0	0	0	0	0	0	20	13	0	0	1	0	0	2	0	1	0	3
ASV_1016	0	0	0	0	0	0	0	0	0	4	16	10	2	9	1	3	0	0	0	0	0
ASV_1018	0	0	1	0	0	0	0	0	0	0	0	1	1	6	11	5	7	2	0	8	1
ASV_1019	0	0	0	0	0	0	1	0	1	0	0	1	2	2	5	1	1	5	15	4	7
ASV_1021	0	0	0	0	0	0	0	0	0	1	2	0	2	3	3	5	9	9	0	4	8
ASV_1022	0	0	0	0	0	0	0	0	0	0	0	5	6	1	12	2	0	1	2	17	0
ASV_1023	0	0	0	0	0	0	0	0	0	0	1	0	5	0	3	3	5	16	1	11	0
ASV_1024	0	0	0	0	0	0	0	0	0	0	0	16	0	1	0	0	1	23	3	0	1
ASV_1025	0	0	0	0	0	0	2	0	3	1	0	0	3	6	17	1	1	6	1	5	0
ASV_1026	1	0	0	0	0	0	0	0	2	6	8	2	1	4	2	1	13	0	5	0	2
ASV_1028	0	0	0	0	0	0	0	0	0	7	6	22	1	3	0	1	7	0	0	0	0
ASV_1029	0	1	0	0	0	0	0	0	0	1	0	11	5	23	0	2	2	1	1	0	0
ASV_1030	0	0	0	1	0	1	1	0	1	0	2	2	2	4	11	5	7	3	3	3	1
ASV_1033	0	0	0	0	0	0	0	0	0	0	0	0	3	1	2	34	0	0	0	2	5
ASV_1034	0	0	0	0	0	0	0	0	0	0	0	0	0	0	2	1	23	1	4	5	11
ASV_1035	0	0	0	0	1	0	0	4	1	4	1	1	3	3	5	2	5	6	1	6	0
ASV_1036	0	0	0	0	0	0	0	1	2	2	6	3	9	0	6	0	0	12	1	2	1
ASV_1039	0	0	0	0	1	0	0	0	0	0	0	2	0	0	2	2	4	0	12	1	21
ASV_1040	0	0	0	0	0	0	0	0	0	0	0	1	0	0	0	0	11	2	5	0	26
ASV_1041	0	0	0	0	0	0	0	0	1	17	7	8	1	0	1	0	3	4	1	2	0
ASV_1042	0	0	0	0	0	0	0	0	0	0	0	0	3	0	2	0	14	5	3	12	6
ASV_1046	0	0	0	1	1	13	11	16	4	0	0	0	0	0	0	0	0	0	0	0	0
ASV_1047	0	0	0	4	2	24	8	5	0	0	0	0	0	0	0	0	1	0	2	0	0
ASV_1048	0	0	0	0	0	0	0	0	0	1	1	4	1	1	6	4	3	11	10	3	1
ASV_1049	0	0	0	0	0	0	0	0	2	2	6	3	6	2	4	2	3	4	1	3	8
ASV_1051	0	0	0	0	0	0	0	0	0	1	0	1	5	3	15	1	2	12	5	0	1
ASV_1053	0	0	0	0	0	0	0	0	0	3	1	1	1	2	8	0	7	3	9	2	9
ASV_1054	0	0	0	1	4	0	3	0	2	0	1	5	3	5	5	3	0	3	8	3	0
ASV_1055	0	0	0	0	0	0	0	0	0	0	0	0	8	0	3	0	0	0	3	32	0
ASV_1056	0	0	0	0	0	0	0	0	0	0	0	6	9	2	2	1	4	13	4	5	0
ASV_1057	0	0	0	0	0	0	0	0	0	0	0	3	12	3	4	14	1	0	3	4	2
ASV_1059	0	0	0	0	0	0	0	0	0	0	0	3	0	2	3	2	3	25	2	0	6
ASV_1060	0	0	0	0	0	0	0	0	0	0	0	2	3	4	3	2	11	5	8	0	5
ASV_1061	0	0	0	0	0	0	0	0	0	0	0	1	1	1	0	1	6	4	23	1	6
ASV_1062	0	0	0	0	0	0	0	0	0	0	0	0	0	1	1	3	14	8	7	2	4
ASV_1063	0	0	0	0	0	0	0	0	0	0	1	0	3	4	4	2	12	6	3	2	7
ASV_1064	0	0	0	0	0	0	0	0	0	0	3	1	7	6	0	6	7	4	3	1	6
ASV_1065	1	2	0	0	0	0	0	0	0	0	0	0	4	3	10	1	9	6	2	3	3
ASV_1066	0	0	0	0	0	0	0	0	0	1	0	0	0	0	0	0	10	24	7	1	0
ASV_1067	0	0	0	0	0	0	1	2	0	2	2	0	0	2	3	25	1	1	0	5	0
ASV_1068	0	0	0	0	0	0	0	0	0	0	0	0	7	0	2	2	21	1	2	8	1
ASV_1071	0	0	0	0	0	0	0	0	0	9	23	0	0	0	9	0	0	0	1	0	3
ASV_1072	0	0	0	0	0	1	1	0	0	4	3	3	12	3	3	1	1	0	0	13	0
ASV_1073	0	0	0	0	0	0	0	0	0	0	1	13	1	12	0	7	1	3	6	0	1
ASV_1074	0	1	0	0	0	0	0	0	0	0	3	1	0	3	13	0	7	7	8	2	0
ASV_1075	0	0	0	0	0	1	0	0	0	0	0	0	11	14	0	19	0	0	0	0	0
ASV_1076	0	0	0	0	0	0	0	0	0	0	0	0	0	0	1	0	0	0	0	44	0
ASV_1078	9	6	8	12	3	1	2	0	0	0	0	0	0	1	0	0	0	0	0	0	0
ASV_1079	0	0	0	0	0	0	0	1	0	0	0	0	0	0	4	1	5	5	6	18	0
ASV_1080	2	0	3	7	0	5	15	2	0	1	1	1	2	1	0	0	1	0	0	0	1
ASV_1081	6	0	1	5	9	5	2	5	0	1	2	0	2	0	0	0	0	0	1	1	0
ASV_1082	0	0	0	0	13	0	0	10	5	0	0	5	1	0	0	1	2	0	0	0	0
ASV_1083	0	0	3	2	1	0	0	0	0	1	20	6	1	1	0	1	1	0	3	0	2
ASV_1087	0	0	0	0	0	0	2	3	3	0	6	15	0	0	0	0	0	5	7	0	2
ASV_1088	1	0	1	0	0	0	2	0	11	0	3	1	5	0	0	1	2	2	2	2	7
ASV_1089	0	0	0	0	0	0	0	0	1	1	1	0	5	5	15	3	6	2	2	0	2
ASV_1090	0	0	0	0	0	0	0	0	0	0	0	0	1	1	2	16	2	2	10	1	8
ASV_1092	0	0	0	0	0	0	17	0	18	0	0	0	0	0	1	0	0	0	0	4	3
ASV_1097	0	0	0	0	0	0	0	0	0	5	14	6	3	5	5	1	0	0	1	3	1
ASV_1098	0	0	0	0	0	0	0	0	0	1	1	10	13	3	1	1	1	8	0	0	5
ASV_1099	0	0	0	0	0	0	0	0	0	5	2	0	2	1	6	2	6	8	3	8	1
ASV_1101	0	0	0	0	0	0	0	0	1	0	1	5	1	0	0	1	2	15	11	0	7
ASV_1102	0	0	0	0	0	0	0	0	0	0	0	0	3	0	0	0	2	10	4	13	12
ASV_1103	0	0	0	1	0	0	0	0	0	0	0	3	2	2	0	0	2	3	13	11	7
ASV_1105	0	0	0	0	0	0	0	0	0	0	0	0	0	0	0	0	4	0	23	0	17
ASV_1106	0	0	0	0	0	0	0	0	0	0	0	0	0	0	25	3	3	0	1	11	1
ASV_1108	4	0	0	3	0	0	4	2	2	0	8	0	5	1	0	4	1	3	1	1	2
ASV_1109	0	0	0	0	0	1	0	0	0	1	2	5	2	3	2	1	13	4	7	0	1
ASV_1110	0	0	0	0	0	0	1	1	0	4	1	1	0	3	1	1	8	12	3	2	4
ASV_1111	0	0	0	0	0	0	0	0	0	0	4	2	0	0	0	1	1	3	6	25	0
ASV_1112	0	0	0	0	0	0	0	0	0	0	0	0	2	1	34	1	1	0	0	3	0
ASV_1113	0	0	0	1	0	0	0	4	1	2	5	0	5	1	2	11	1	3	1	4	0
ASV_1115	0	0	0	0	0	0	0	2	2	14	10	2	2	3	2	4	0	0	1	0	0
ASV_1116	0	0	0	0	0	0	0	0	0	3	0	3	1	4	9	6	10	0	0	6	0
ASV_1119	0	0	0	0	2	3	1	1	0	0	0	1	1	0	1	31	0	0	0	0	0
ASV_1120	3	0	0	6	21	3	1	1	0	1	0	0	0	0	1	0	0	3	1	1	1
ASV_1121	0	0	1	0	0	0	0	0	0	0	0	0	2	1	23	2	0	1	6	7	0
ASV_1122	0	0	1	1	0	0	1	2	3	3	3	11	1	7	2	0	1	2	5	0	0
ASV_1123	0	0	3	0	2	1	2	0	0	11	11	6	1	1	1	4	0	0	0	0	0
ASV_1124	0	0	0	7	0	6	18	1	9	0	0	0	1	0	0	0	0	0	0	0	1
ASV_1125	0	0	0	0	0	0	0	0	1	23	7	12	0	0	0	0	0	0	0	0	0
ASV_1126	0	0	0	0	0	0	0	0	0	19	9	2	0	10	0	2	0	0	1	0	0
ASV_1128	0	0	0	0	0	0	1	0	1	1	5	1	2	0	1	0	5	10	5	5	6
ASV_1131	0	0	0	0	0	0	0	0	0	0	0	2	11	3	4	1	5	2	8	5	2
ASV_1132	0	0	0	0	0	0	0	0	0	0	0	1	5	1	18	3	0	0	0	15	0
ASV_1133	0	0	0	0	0	0	0	0	0	0	0	4	9	2	0	2	10	3	5	4	4
ASV_1134	0	0	0	0	0	0	0	0	0	0	0	3	0	3	3	1	7	13	4	6	3
ASV_1135	0	0	0	0	0	0	0	0	0	0	0	0	0	1	1	0	6	2	14	15	4
ASV_1136	0	0	0	3	0	0	0	0	1	0	11	0	4	2	8	0	0	7	0	1	4
ASV_1137	0	0	0	0	1	0	1	6	17	1	3	0	3	2	3	1	0	1	0	0	1
ASV_1141	0	0	0	0	0	0	0	0	0	0	0	0	0	0	0	9	15	12	0	4	1
ASV_1142	6	11	8	5	4	5	0	0	0	0	0	0	0	0	0	1	0	1	0	1	0
ASV_1143	0	0	0	0	1	6	0	2	1	3	1	6	3	5	1	0	0	8	2	3	0
ASV_1144	0	0	0	0	0	0	0	0	0	4	5	1	4	1	4	2	7	0	6	7	1
ASV_1145	0	0	0	0	0	0	1	0	0	7	12	10	4	8	0	0	0	0	0	0	0
ASV_1146	0	0	0	0	0	0	0	0	0	1	3	3	1	0	9	2	2	0	13	3	5
ASV_1149	0	0	0	0	0	0	0	0	1	0	3	6	1	0	2	3	8	2	4	10	2
ASV_1150	0	0	0	0	0	0	0	0	0	0	0	2	7	9	10	2	0	1	5	6	0
ASV_1151	0	0	0	0	0	0	0	0	0	0	0	0	1	0	3	1	29	0	0	8	0
ASV_1152	0	0	0	0	0	0	0	0	0	0	0	0	1	1	6	1	0	0	2	31	0
ASV_1153	0	0	0	0	0	0	0	0	0	0	0	0	0	2	2	0	9	1	4	24	0
ASV_1154	2	0	8	9	3	16	1	1	0	0	0	0	0	0	0	0	0	0	0	0	0
ASV_1156	0	0	1	0	0	0	0	0	5	2	3	1	0	0	5	8	12	0	0	2	0
ASV_1157	0	0	0	0	0	0	0	0	2	12	8	9	0	5	1	1	0	0	1	0	0
ASV_1159	0	0	0	0	0	0	0	0	0	0	0	0	0	0	1	1	1	2	4	26	4
ASV_1160	0	0	0	0	0	0	0	0	0	0	0	0	0	0	0	0	4	13	11	0	12
ASV_1161	0	0	0	0	0	0	0	0	0	0	0	0	0	0	0	0	6	5	14	0	13
ASV_1163	1	0	2	4	0	3	2	6	1	1	6	0	2	0	1	0	1	4	0	5	0
ASV_1164	0	0	0	0	0	0	0	0	0	0	0	0	0	1	0	0	1	4	4	1	29
ASV_1165	0	0	1	0	0	1	0	4	3	0	1	0	3	1	1	5	6	1	4	2	7
ASV_1167	1	0	1	0	0	0	1	1	0	3	9	5	3	4	3	1	2	1	0	5	1
ASV_1168	0	0	0	0	0	0	0	1	0	0	0	4	9	25	2	0	0	0	0	0	0
ASV_1169	0	0	0	0	0	0	0	0	0	3	0	0	7	0	2	0	8	2	8	4	7
ASV_1170	0	0	0	0	0	0	3	0	1	1	0	0	2	2	6	6	4	0	2	5	9
ASV_1171	0	0	0	0	0	0	0	0	1	1	5	2	0	0	0	16	16	0	0	0	0
ASV_1172	0	0	0	0	0	0	0	0	0	14	3	4	3	2	3	0	5	2	1	2	2
ASV_1173	0	0	0	0	0	0	0	0	3	3	6	0	0	0	1	3	5	8	5	3	4
ASV_1174	0	0	0	0	0	0	0	0	0	0	1	10	5	4	2	1	1	0	6	5	6
ASV_1175	0	0	0	0	0	0	0	0	0	0	0	0	1	6	0	0	30	0	2	0	2
ASV_1176	0	0	0	0	0	0	1	0	2	0	0	0	0	0	0	0	2	2	11	10	13
ASV_1177	0	0	0	3	7	2	6	3	2	0	0	0	1	0	0	3	4	0	4	1	0
ASV_1178	0	0	0	0	0	0	0	0	0	19	14	4	0	2	0	0	0	0	0	0	0
ASV_1179	0	0	0	0	0	0	14	0	21	0	0	0	2	0	0	0	0	0	0	0	0
ASV_1181	0	0	0	0	0	0	0	0	3	0	3	3	5	6	1	9	1	1	0	4	2
ASV_1182	0	0	0	0	0	0	0	0	0	0	0	0	0	0	0	0	7	11	7	0	12
ASV_1183	0	0	0	1	2	9	2	1	1	5	4	2	2	3	1	2	3	0	1	0	0
ASV_1184	0	0	0	1	0	2	0	0	0	1	1	0	4	7	8	5	2	1	4	3	0
ASV_1185	0	0	0	0	0	0	0	0	0	0	0	0	2	0	3	0	2	7	9	8	8
ASV_1186	0	0	0	0	0	0	0	0	0	0	0	5	3	3	1	1	3	9	1	1	12
ASV_1188	0	0	0	0	0	0	0	0	0	0	0	1	2	0	11	1	9	0	1	12	1
ASV_1189	0	0	0	0	0	0	0	0	0	0	0	0	0	0	0	0	2	10	16	0	11
ASV_1190	0	0	0	0	0	0	0	0	0	2	2	0	7	5	3	5	3	8	3	1	0
ASV_1193	8	17	8	1	3	2	0	1	0	0	0	0	0	0	0	0	0	0	0	0	0
ASV_1195	0	0	0	1	0	0	0	1	0	10	6	2	1	1	1	2	2	6	2	2	3
ASV_1196	0	0	0	0	0	0	0	21	0	2	1	0	0	5	1	2	0	0	1	6	1
ASV_1197	0	0	0	0	0	2	10	2	2	0	1	0	2	0	0	2	0	0	1	12	6
ASV_1199	0	0	0	0	0	0	0	0	0	12	7	11	5	3	0	0	1	1	0	0	0
ASV_1200	0	0	0	0	0	0	0	0	0	1	0	0	4	0	8	9	3	7	2	3	3
ASV_1201	0	0	0	0	0	0	0	0	0	1	0	1	1	4	6	4	1	9	5	4	4
ASV_1204	0	0	0	0	0	0	0	0	0	0	0	3	2	4	1	0	2	12	3	3	10
ASV_1205	0	0	1	0	1	4	4	15	0	0	0	0	0	1	0	0	3	0	0	3	0
ASV_1206	0	0	0	0	0	0	7	1	9	4	1	4	1	1	0	1	1	0	2	2	2
ASV_1207	0	0	0	0	0	0	0	0	0	1	0	8	1	5	0	3	0	3	6	1	10
ASV_1211	0	1	0	0	0	0	0	0	0	2	0	0	1	1	12	3	6	1	1	7	3
ASV_1212	0	0	0	0	0	0	0	0	0	0	1	1	3	0	1	0	3	9	4	3	11
ASV_1214	5	0	1	3	1	1	1	3	5	0	0	0	0	5	0	1	2	0	2	9	0
ASV_1215	1	0	0	1	8	4	1	0	0	1	5	5	4	5	0	3	0	0	1	0	0
ASV_1216	0	0	0	0	0	0	1	1	0	0	0	0	1	0	33	0	0	0	0	3	0
ASV_1218	0	0	0	1	5	3	12	10	6	0	0	0	0	0	0	0	0	0	2	0	0
ASV_1220	0	0	0	0	0	0	0	0	0	1	3	1	9	2	6	5	5	0	0	6	1
ASV_1221	0	0	0	0	0	0	0	0	1	6	9	4	3	3	1	0	6	3	0	2	1
ASV_1222	0	0	0	0	0	0	1	0	0	1	0	0	0	1	0	0	3	28	2	1	2
ASV_1225	0	0	0	0	0	0	0	0	0	0	0	2	0	1	0	2	10	4	11	4	5
ASV_1228	0	0	0	0	0	0	0	0	0	0	2	0	1	7	3	0	13	3	2	4	2
ASV_1229	0	0	0	0	0	0	0	0	1	0	0	0	1	0	1	5	1	12	4	10	0
ASV_1232	0	0	0	0	0	0	0	0	1	17	12	1	1	2	0	1	1	1	0	0	0
ASV_1234	0	0	0	0	0	0	0	0	6	3	2	0	2	3	2	2	5	1	8	1	2
ASV_1236	0	0	0	0	0	0	1	0	1	0	1	1	3	1	1	0	1	10	7	3	7
ASV_1239	0	0	0	0	0	0	0	0	0	1	0	1	2	0	0	1	3	2	9	0	18
ASV_1240	0	0	0	1	0	0	0	1	0	1	0	1	8	18	4	0	1	1	1	0	0
ASV_1241	0	0	0	0	2	0	3	13	1	1	0	0	0	0	2	0	7	1	2	4	1
ASV_1242	0	0	0	0	0	0	0	0	0	0	0	0	0	0	0	4	0	0	16	15	2
ASV_1243	13	17	1	0	0	1	0	1	1	0	0	0	0	1	0	0	0	2	0	1	0
ASV_1245	10	0	3	7	0	14	1	0	0	0	0	0	0	0	0	0	0	0	0	1	2
ASV_1247	6	0	3	1	0	0	1	4	0	5	5	3	0	3	1	1	1	1	2	1	0
ASV_1248	2	3	3	1	0	0	0	3	0	0	0	0	2	2	2	0	0	4	7	8	1
ASV_1249	0	0	1	4	0	29	4	0	0	0	0	0	0	0	0	0	0	0	0	0	0
ASV_1250	0	0	1	2	3	1	9	4	5	2	2	3	1	0	1	0	2	0	1	1	0
ASV_1251	0	0	0	0	0	0	2	4	0	1	6	3	11	5	2	1	0	1	1	1	0
ASV_1252	0	0	0	0	0	0	0	0	0	1	9	20	0	3	0	0	1	4	0	0	0
ASV_1253	0	0	0	0	0	0	0	0	0	2	2	3	3	7	7	0	2	0	0	12	0
ASV_1254	0	0	0	1	0	0	0	0	5	2	0	0	0	1	0	0	15	6	1	2	5
ASV_1255	0	0	0	0	0	0	0	0	0	4	3	6	4	7	2	0	5	2	1	0	4
ASV_1256	0	0	0	0	0	0	2	0	2	4	0	1	1	1	8	2	6	1	2	4	4
ASV_1257	0	0	0	0	0	0	0	0	0	0	1	9	2	3	5	3	0	5	2	6	2
ASV_1258	0	0	0	0	0	0	0	0	0	0	0	9	2	2	1	2	1	5	8	5	3
ASV_1260	0	0	0	0	0	0	1	0	0	9	5	4	1	6	7	1	1	1	0	0	0
ASV_1261	0	0	0	0	0	1	0	0	7	0	1	7	1	0	0	0	0	11	3	0	4
ASV_1263	0	0	0	1	1	0	1	0	0	1	0	1	3	0	1	2	1	6	7	9	2
ASV_1264	0	0	0	0	0	0	0	0	0	0	0	0	0	0	0	0	0	25	0	0	11
ASV_1265	0	0	0	0	0	0	0	2	4	0	0	0	3	0	0	0	2	11	5	2	7
ASV_1266	0	0	0	0	0	0	1	5	0	8	1	1	0	1	6	0	9	2	1	1	0
ASV_1270	0	0	0	0	0	0	0	0	0	2	1	0	3	1	7	5	5	4	4	2	3
ASV_1271	0	0	0	0	0	0	0	0	0	2	4	6	4	9	3	1	0	1	4	0	3
ASV_1273	0	0	0	0	0	0	0	0	0	8	6	1	1	0	0	1	5	6	5	0	4
ASV_1274	0	0	0	0	0	0	0	0	0	0	1	0	4	6	3	15	5	0	0	3	0
ASV_1276	0	0	0	0	0	0	0	0	0	0	0	1	1	0	0	0	5	9	4	0	17
ASV_1277	0	0	0	0	0	0	0	0	0	0	0	0	2	0	20	2	1	0	0	12	0
ASV_1279	0	0	0	0	0	0	0	0	0	0	0	0	0	0	0	2	0	7	21	0	7
ASV_1281	0	0	0	0	0	0	0	0	9	10	6	0	0	1	2	0	2	0	3	0	2
ASV_1282	0	0	0	0	0	0	0	0	0	1	0	2	5	2	5	4	6	5	2	2	0
ASV_1283	0	0	0	0	0	0	0	0	0	1	0	8	4	7	0	2	2	1	8	0	2
ASV_1284	0	0	0	0	0	0	0	0	0	0	0	0	5	1	0	0	5	4	8	7	5
ASV_1285	1	0	0	0	0	0	0	0	0	0	0	0	3	16	8	4	2	0	0	1	0
ASV_1286	0	0	0	0	0	0	0	0	0	0	0	1	7	2	17	7	1	0	0	0	0
ASV_1287	0	0	0	0	0	0	0	0	0	3	3	2	2	1	1	2	2	8	2	1	7
ASV_1289	1	0	8	1	2	0	8	1	8	0	1	0	0	0	1	3	0	2	0	0	0
ASV_1291	0	0	0	0	2	0	0	2	0	1	0	2	7	7	2	4	3	0	3	2	1
ASV_1292	0	0	0	0	0	0	0	1	1	1	2	3	0	7	0	5	4	6	4	0	2
ASV_1293	0	0	0	0	0	0	3	1	1	0	3	8	9	1	0	0	0	10	0	0	0
ASV_1294	0	0	0	0	0	0	0	0	0	4	1	0	0	0	2	0	3	0	0	26	0
ASV_1295	0	0	0	0	0	0	0	0	0	3	0	1	1	2	15	3	5	2	0	3	1
ASV_1296	0	0	0	0	0	0	0	0	1	4	9	2	0	1	0	0	7	3	5	4	0
ASV_1297	0	0	0	0	0	0	0	0	2	7	2	0	3	6	2	2	2	1	1	0	8
ASV_1299	0	0	0	0	0	0	0	0	0	0	3	1	4	2	3	13	2	2	0	2	4
ASV_1300	0	0	0	0	0	0	0	0	0	0	1	0	2	1	0	0	5	10	5	2	10
ASV_1301	0	1	0	0	0	0	0	0	0	0	0	0	2	0	1	1	4	4	4	1	18
ASV_1306	0	0	0	0	0	0	0	0	0	0	0	0	0	0	0	0	0	0	1	35	0
ASV_1307	1	0	0	4	0	1	0	0	1	0	1	1	5	2	1	1	4	0	1	10	0
ASV_1308	0	0	0	0	0	0	0	0	1	2	5	11	0	1	0	0	2	8	2	0	1
ASV_1309	0	0	0	0	0	0	0	0	0	0	0	2	0	6	8	15	0	0	0	2	1
ASV_1312	0	0	0	0	0	0	0	1	0	8	4	8	7	3	0	0	1	1	1	0	0
ASV_1313	0	0	0	0	0	0	0	0	0	0	0	3	0	0	6	2	5	3	5	2	8
ASV_1314	0	0	0	0	0	0	0	0	0	0	0	0	4	8	9	0	7	0	1	4	0
ASV_1316	0	0	0	0	0	0	0	0	0	0	0	0	2	0	3	0	5	10	5	4	3
ASV_1317	0	0	0	0	0	0	0	2	1	0	1	0	0	0	2	4	15	3	0	6	0
ASV_1318	0	0	0	0	0	0	0	0	0	0	4	3	1	7	1	3	1	1	5	3	5
ASV_1319	0	0	0	0	0	0	0	0	0	0	0	0	0	0	0	1	6	8	18	0	0
ASV_1320	0	0	0	0	0	0	0	0	0	0	0	0	1	0	5	0	7	1	12	5	2
ASV_1321	0	0	0	6	0	5	7	15	1	0	0	0	0	0	0	0	1	0	0	0	0
ASV_1322	0	0	0	0	0	0	0	3	1	2	0	1	2	1	1	1	10	7	2	0	4
ASV_1323	0	0	0	0	0	0	0	0	0	1	0	0	0	0	0	1	2	3	24	0	4
ASV_1324	0	0	0	0	0	0	0	0	0	4	0	0	0	2	7	3	5	1	1	8	4
ASV_1325	0	0	0	0	0	0	0	0	0	1	10	0	2	5	8	5	0	1	0	3	0
ASV_1326	0	0	0	0	0	0	0	0	0	2	0	2	2	3	7	6	0	3	1	6	3
ASV_1327	0	0	0	0	0	0	0	0	1	2	2	1	1	3	1	1	4	10	1	1	7
ASV_1328	0	0	0	0	0	1	0	0	1	0	1	0	3	0	6	0	0	5	11	7	0
ASV_1329	0	0	0	1	0	0	0	0	0	0	0	1	2	3	1	3	12	6	3	3	0
ASV_1331	0	0	0	0	0	0	0	0	0	0	0	0	0	0	33	2	0	0	0	0	0
ASV_1332	15	17	1	0	0	0	0	0	0	0	0	0	0	0	0	0	0	0	0	0	0
ASV_1333	3	8	6	2	10	4	0	0	0	0	0	0	0	0	0	0	0	0	0	0	0
ASV_1334	1	0	6	1	12	0	3	1	5	0	0	0	0	0	0	1	1	0	0	2	0
ASV_1335	1	0	0	0	1	0	4	3	2	3	5	6	0	0	1	0	1	1	1	2	0
ASV_1336	0	0	0	0	0	0	0	1	1	1	0	0	2	1	4	4	4	2	7	1	5
ASV_1338	0	0	0	0	0	1	0	0	0	2	0	0	5	5	11	0	3	3	0	3	0
ASV_1339	0	0	0	1	0	1	1	3	5	2	4	5	2	2	0	1	0	4	0	1	1
ASV_1340	0	0	0	0	0	0	0	0	0	0	0	0	0	0	2	0	2	11	10	1	7
ASV_1341	0	0	0	0	0	0	0	0	0	0	0	0	1	0	6	20	1	0	0	5	0
ASV_1342	31	3	0	0	0	0	0	0	0	0	0	0	0	0	0	0	0	0	0	0	0
ASV_1343	9	1	5	3	4	9	0	1	0	0	0	0	0	0	1	0	0	0	0	0	1
ASV_1344	0	0	0	0	0	0	1	2	5	1	1	2	0	2	3	3	5	4	1	2	2
ASV_1345	0	0	0	2	0	0	2	1	0	0	0	5	3	2	1	0	0	1	1	14	2
ASV_1346	0	0	0	0	0	0	0	0	0	18	5	9	0	2	0	0	0	0	0	0	0
ASV_1348	0	0	0	0	0	0	0	0	1	2	5	0	3	3	3	3	8	3	2	0	1
ASV_1352	0	0	0	0	0	0	0	0	0	0	3	3	3	2	4	8	1	7	0	1	2
ASV_1353	0	0	0	0	0	0	0	0	0	0	0	4	8	2	15	2	0	0	1	2	0
ASV_1354	0	0	0	0	0	0	0	0	0	0	0	0	5	24	0	0	0	1	3	0	1
ASV_1355	0	0	0	0	0	0	0	0	0	0	0	0	0	0	0	0	14	3	7	0	10
ASV_1356	0	0	0	0	0	0	0	0	0	0	0	0	0	0	8	3	14	0	0	9	0
ASV_1358	1	5	6	7	0	6	4	1	0	0	0	0	0	0	0	0	1	0	0	0	0
ASV_1359	0	0	0	0	0	0	0	0	1	0	3	1	3	1	1	1	3	3	5	3	6
ASV_1360	0	0	0	1	0	0	6	2	1	2	2	1	4	3	2	1	1	1	2	3	0
ASV_1362	0	0	0	0	0	0	0	0	0	0	0	8	4	1	2	5	3	2	3	4	0
ASV_1364	0	0	0	0	0	0	0	0	1	0	0	4	1	0	2	1	2	11	0	8	1
ASV_1365	0	0	0	0	0	0	0	2	0	4	1	0	0	2	2	0	3	5	1	6	6
ASV_1366	0	0	0	0	0	0	4	2	3	0	2	1	6	1	4	0	2	1	2	2	1
ASV_1367	0	0	0	0	0	0	0	0	0	0	0	4	4	2	3	1	6	5	1	4	1
ASV_1368	0	0	0	0	0	0	0	0	2	1	3	0	3	2	4	1	2	11	1	1	0
ASV_1369	0	0	0	0	0	0	0	0	0	0	4	2	3	2	1	7	3	2	1	2	5
ASV_1370	0	0	0	0	0	0	0	0	0	0	0	0	0	0	2	2	7	6	2	6	7
ASV_1371	0	0	0	0	0	0	0	0	1	2	2	1	0	1	2	3	5	11	1	0	3
ASV_1372	0	0	0	0	0	0	0	1	1	1	1	2	1	3	0	0	3	1	1	13	4
ASV_1373	26	0	1	6	0	0	0	0	0	0	0	0	0	0	0	0	0	0	0	0	0
ASV_1374	6	2	6	0	1	1	0	1	0	0	0	0	3	0	3	1	2	0	6	1	0
ASV_1375	0	0	1	1	0	1	0	0	0	1	0	0	0	0	0	0	0	1	2	4	22
ASV_1376	0	0	0	0	0	0	0	1	0	0	2	1	1	2	0	1	3	7	5	4	6
ASV_1377	0	0	0	0	4	2	0	17	0	2	2	1	1	2	1	0	0	0	1	0	0
ASV_1379	0	0	0	0	0	0	0	2	1	0	0	0	2	0	3	0	5	1	9	6	4
ASV_1381	0	0	0	0	0	0	0	0	0	0	3	5	0	0	0	0	0	12	12	0	1
ASV_1383	0	0	0	0	0	0	0	0	0	0	0	0	6	0	10	3	2	0	0	5	7
ASV_1384	0	0	0	0	0	0	0	0	0	0	0	1	10	13	0	0	0	2	1	6	0
ASV_1385	0	1	4	2	2	0	0	1	0	0	6	1	5	6	0	0	0	0	0	0	0
ASV_1386	0	1	1	0	3	1	0	2	1	3	0	0	0	0	2	1	1	0	1	2	1
ASV_1387	0	2	0	0	0	0	0	0	0	0	0	0	0	3	0	0	1	13	2	2	8
ASV_1389	0	0	0	0	0	0	0	0	0	0	0	4	1	5	0	0	4	2	10	0	3
ASV_1390	0	0	0	0	0	0	0	0	0	1	1	1	6	3	4	0	0	0	0	14	1
ASV_1391	0	0	0	0	0	0	0	0	0	0	0	1	3	2	3	3	1	10	1	7	0
ASV_1392	0	0	0	0	0	0	1	1	2	4	1	1	0	1	5	0	8	1	2	1	3
ASV_1393	0	0	0	0	0	0	0	0	0	0	0	1	4	0	0	3	2	2	4	11	3
ASV_1394	0	0	0	0	0	0	0	0	0	0	0	0	0	1	0	2	7	18	0	2	1
ASV_1396	0	0	0	0	0	0	0	0	0	1	0	0	0	0	0	0	6	20	1	0	3
ASV_1399	0	0	3	1	0	0	0	0	0	5	8	4	1	6	1	1	1	1	0	0	0
ASV_1400	0	0	0	0	2	3	16	2	6	0	0	0	0	0	0	0	0	1	0	2	0
ASV_1401	0	0	0	0	0	0	0	0	1	1	3	2	3	2	5	7	2	2	1	1	2
ASV_1402	0	0	0	0	0	0	1	0	0	1	2	3	3	7	2	6	1	0	4	2	0
ASV_1403	0	0	0	0	0	0	1	0	9	8	0	0	0	0	0	1	3	1	5	0	4
ASV_1404	0	0	0	0	0	0	0	0	0	0	2	2	0	0	0	1	2	10	10	1	4
ASV_1405	0	0	0	0	0	0	0	0	0	0	1	1	3	0	1	0	3	0	3	16	4
ASV_1406	0	0	0	0	0	0	0	0	0	0	0	2	8	13	1	4	0	0	3	1	0
ASV_1408	0	0	0	0	0	0	0	0	0	0	0	0	5	0	3	1	0	0	1	22	0
ASV_1410	2	1	1	1	0	2	1	2	1	0	0	2	1	0	0	3	0	0	0	3	0
ASV_1411	0	0	0	0	1	0	0	11	5	0	4	5	0	1	0	1	1	0	1	0	0
ASV_1412	0	0	0	0	0	0	0	0	0	0	0	0	0	1	0	0	16	9	0	2	0
ASV_1414	0	1	0	0	0	0	0	0	0	0	0	1	1	0	0	0	7	10	2	0	6
ASV_1417	0	0	0	0	0	0	1	0	0	0	0	0	7	5	2	0	1	3	3	2	6
ASV_1418	0	0	0	0	0	0	0	0	0	0	0	0	0	0	0	0	3	2	10	2	13
ASV_1419	0	0	0	0	0	0	0	0	0	0	0	0	3	0	0	0	3	6	8	7	2
ASV_1420	0	0	0	0	0	0	0	0	0	0	0	0	1	0	3	1	6	2	11	4	2
ASV_1421	0	0	0	0	0	0	0	0	0	0	0	0	0	1	0	0	5	1	6	0	17
ASV_1423	0	0	0	0	0	0	6	9	1	1	3	1	1	0	3	2	3	0	0	0	0
ASV_1424	1	0	4	2	0	3	0	1	0	6	0	2	5	1	0	0	1	1	0	1	3
ASV_1426	0	0	0	0	0	0	0	1	4	1	0	1	5	9	0	10	0	0	0	0	0
ASV_1427	0	0	0	0	0	1	2	2	0	0	1	2	0	4	1	1	4	2	5	3	3
ASV_1428	0	0	0	0	0	0	0	0	0	7	4	0	1	9	4	2	2	2	0	0	0
ASV_1429	0	0	0	0	0	0	1	0	1	1	0	5	1	3	0	1	3	2	6	3	4
ASV_1430	0	0	0	1	0	0	1	0	3	5	6	1	3	2	4	0	1	2	2	0	0
ASV_1435	0	0	0	0	0	0	1	0	3	0	2	1	0	0	2	2	2	1	7	5	5
ASV_1437	0	0	0	0	0	0	0	0	0	0	0	2	1	0	6	0	0	1	2	2	17
ASV_1439	0	0	0	0	0	0	0	0	0	0	0	0	0	0	2	1	6	5	6	8	3
ASV_1440	0	0	0	9	6	0	3	1	0	0	1	0	1	1	0	0	1	1	1	1	0
ASV_1441	1	0	1	16	1	7	0	3	0	0	0	0	0	0	0	0	0	0	0	0	0
ASV_1443	0	0	0	0	0	0	0	0	5	8	6	3	3	0	3	0	0	0	0	0	0
ASV_1444	1	0	1	0	2	2	5	9	8	1	0	0	0	0	0	0	0	0	0	0	0
ASV_1446	0	0	0	2	0	3	11	6	2	0	0	1	0	0	0	1	2	1	0	0	0
ASV_1447	0	0	0	0	0	0	0	0	0	0	0	0	0	0	0	0	0	20	0	0	8
ASV_1448	0	0	0	0	0	0	0	0	0	2	0	0	0	5	2	2	2	4	6	0	6
ASV_1450	8	1	13	1	2	4	0	1	0	0	0	0	0	0	0	0	0	0	0	0	0
ASV_1451	0	0	2	0	1	0	2	0	3	1	2	3	0	5	1	2	4	2	2	0	0
ASV_1453	0	0	0	0	1	0	0	1	1	0	2	2	1	1	3	4	2	2	4	2	4
ASV_1457	0	0	0	0	0	0	0	0	0	7	1	16	0	0	5	0	0	1	0	0	0
ASV_1458	0	0	0	0	0	0	0	0	0	2	1	1	2	2	9	4	6	0	0	3	0
ASV_1459	0	0	0	0	0	0	0	0	0	1	3	2	1	4	1	8	1	3	1	3	2
ASV_1461	0	0	0	0	0	1	0	0	3	0	1	1	1	4	3	3	1	5	1	3	3
ASV_1462	0	0	0	0	0	0	0	0	0	0	0	0	4	6	13	0	0	0	5	0	2
ASV_1463	0	0	0	0	0	0	0	0	0	0	0	0	4	0	0	0	2	0	0	24	0
ASV_1464	0	0	0	0	0	0	0	0	0	0	0	0	5	0	2	3	6	0	5	7	2
ASV_1465	0	0	0	0	0	0	0	0	0	0	0	0	1	3	1	2	2	1	8	10	2
ASV_1466	0	0	0	0	0	0	3	0	1	0	0	3	1	1	2	1	2	4	4	0	8
ASV_1467	0	0	0	0	0	1	0	4	0	1	1	0	1	8	4	0	4	1	1	1	1
ASV_1468	0	0	5	1	0	0	1	1	0	1	1	0	1	3	2	2	3	2	2	2	1
ASV_1469	0	0	0	0	0	0	0	0	1	3	0	0	0	0	1	0	13	8	0	1	0
ASV_1470	0	0	0	0	0	0	0	0	0	2	1	0	3	0	3	7	10	1	0	0	1
ASV_1471	0	0	0	0	0	0	0	0	0	0	0	0	2	0	2	6	6	1	2	4	4
ASV_1473	0	0	0	0	0	0	0	0	0	0	0	0	0	0	3	19	0	1	0	3	0
ASV_1474	0	0	0	0	0	0	0	0	3	0	0	0	2	0	1	0	9	9	2	1	1
ASV_1476	0	0	0	0	0	0	0	0	2	2	1	1	0	1	3	1	7	7	3	0	0
ASV_1477	0	0	2	4	2	1	12	5	2	0	0	0	0	0	0	0	0	1	0	0	0
ASV_1480	0	0	0	3	2	0	8	6	4	0	0	0	2	0	0	0	0	1	1	1	1
ASV_1483	0	0	0	0	0	0	0	0	1	0	0	0	9	2	1	2	3	3	3	4	1
ASV_1484	0	0	0	0	0	0	0	0	0	0	0	1	1	2	9	1	4	0	2	8	1
ASV_1485	6	13	3	1	1	0	0	1	0	0	0	0	0	0	0	1	0	0	0	0	0
ASV_1486	5	2	10	3	5	1	0	1	0	0	0	0	0	0	0	0	0	0	0	0	0
ASV_1487	1	0	0	0	0	0	2	0	3	1	5	2	0	1	4	0	0	6	0	1	1
ASV_1488	0	1	5	10	0	0	0	0	0	0	1	0	3	1	0	0	0	0	2	1	1
ASV_1489	0	0	0	0	0	0	2	0	12	1	0	0	0	0	0	0	1	2	3	0	6
ASV_1491	0	0	0	0	0	0	0	0	0	0	0	0	0	0	3	4	2	7	0	11	0
ASV_1493	0	0	0	0	0	0	0	0	0	0	0	7	3	0	0	2	2	3	1	8	0
ASV_1494	0	0	0	0	0	0	0	0	0	0	0	0	1	0	0	0	1	11	10	1	3
ASV_1496	0	0	1	0	0	0	0	1	0	0	2	1	2	0	1	5	6	0	2	3	3
ASV_1497	0	0	0	0	0	0	0	0	0	0	4	0	1	3	5	1	4	2	3	2	2
ASV_1498	0	0	0	0	0	0	0	0	0	0	0	1	0	0	0	0	4	7	2	0	13
ASV_1500	14	4	4	1	2	0	0	0	0	0	0	0	0	0	0	1	0	0	0	0	2
ASV_1501	1	0	7	2	1	3	1	6	0	0	2	0	2	0	0	2	0	1	0	0	0
ASV_1502	0	0	0	0	26	0	1	1	0	0	0	0	0	0	0	0	0	0	0	0	0
ASV_1504	0	0	0	0	1	0	0	1	0	1	9	5	1	2	1	0	0	3	1	2	1
ASV_1505	0	0	0	0	0	2	2	1	0	0	2	2	1	1	6	1	0	5	1	2	2
ASV_1506	0	0	0	0	0	0	3	1	11	2	2	0	0	1	0	0	0	6	0	0	2
ASV_1509	0	0	0	3	0	1	0	0	1	1	1	0	1	0	0	0	2	3	2	7	6
ASV_1511	0	0	0	0	0	0	0	0	3	1	7	1	1	5	2	1	1	0	2	2	2
ASV_1512	0	0	0	0	1	0	0	0	1	1	2	0	0	2	2	1	1	0	13	3	1
ASV_1513	0	0	0	0	0	0	0	0	2	3	0	0	2	4	0	0	7	1	3	3	3
ASV_1516	0	0	0	0	0	0	0	0	0	0	3	2	3	2	2	3	3	6	2	1	1
ASV_1520	0	0	0	0	0	0	0	0	0	0	0	0	3	0	1	0	1	0	8	12	3
ASV_1521	0	0	0	0	0	0	0	0	0	0	0	0	0	0	0	1	3	6	6	0	12
ASV_1523	16	3	4	1	0	0	0	0	0	0	0	0	0	0	0	0	0	0	0	1	0
ASV_1525	0	0	0	1	3	5	8	2	1	0	0	0	0	0	0	0	0	0	1	0	2
ASV_1526	0	0	0	0	0	0	0	0	0	1	5	0	4	6	1	2	0	4	0	0	3
ASV_1527	0	0	0	0	0	0	0	0	1	2	0	1	0	0	2	0	1	14	1	2	2
ASV_1528	0	0	0	0	0	1	1	0	0	4	1	1	4	0	3	2	2	6	0	0	0
ASV_1529	0	0	0	0	0	0	0	0	1	11	3	7	0	2	1	0	0	1	0	0	0
ASV_1530	3	2	0	0	0	0	0	0	2	2	4	6	0	6	0	1	0	0	0	0	0
ASV_1531	0	0	0	0	0	0	0	0	0	0	2	0	0	0	0	0	5	3	5	1	7
ASV_1534	0	0	0	0	0	0	0	0	1	0	1	0	3	1	1	1	1	13	1	1	0
ASV_1537	0	1	0	0	0	0	0	0	2	6	4	0	2	6	0	1	1	2	0	1	0
ASV_1538	0	0	0	0	0	0	0	0	0	0	3	0	1	0	0	0	2	8	0	12	0
ASV_1539	0	0	0	0	0	0	0	0	0	0	0	0	1	0	0	1	1	8	2	7	4
ASV_1541	2	1	2	2	6	6	4	2	2	0	0	0	0	0	0	0	0	0	0	0	0
ASV_1542	3	1	1	6	2	4	4	2	0	0	0	0	0	0	0	0	0	0	0	2	2
ASV_1543	0	0	1	0	0	0	2	2	0	0	4	3	1	4	2	3	1	1	1	1	1
ASV_1544	0	0	0	0	0	0	3	6	0	1	0	2	3	0	0	0	3	1	2	3	3
ASV_1548	0	0	0	0	0	0	0	0	0	1	9	3	3	7	1	0	1	1	1	0	0
ASV_1549	0	0	0	1	0	0	0	0	1	6	0	0	2	0	0	0	2	15	0	0	0
ASV_1550	0	0	0	0	0	0	0	0	0	1	4	2	6	1	3	1	4	3	2	0	0
ASV_1551	0	0	0	0	0	0	0	0	0	1	0	0	1	0	18	0	0	0	0	7	0
ASV_1552	0	0	0	0	0	0	0	0	0	7	12	7	0	0	0	1	0	0	0	0	0
ASV_1553	0	0	0	0	0	0	0	0	0	0	0	1	4	2	0	7	3	1	5	4	0
ASV_1556	0	0	0	0	0	0	0	0	0	0	0	3	3	2	9	0	1	4	0	5	0
ASV_1557	0	0	0	0	0	0	0	0	0	0	0	0	1	4	4	2	1	1	3	10	1
ASV_1558	0	0	0	0	0	0	0	0	0	0	0	0	0	0	0	0	0	3	11	11	2
ASV_1559	0	0	0	0	0	0	0	0	0	0	0	0	0	0	3	0	0	0	0	24	0
ASV_1560	3	0	3	8	0	2	2	4	2	0	0	0	0	0	0	0	0	0	0	0	0
ASV_1562	0	0	0	0	0	0	0	11	11	0	0	0	0	0	0	0	0	1	1	1	0
ASV_1563	0	0	1	1	3	6	4	2	0	0	0	2	0	1	0	1	1	0	0	1	2
ASV_1565	0	0	0	0	0	1	0	2	0	1	7	6	0	0	1	1	1	3	1	0	1
ASV_1566	0	0	1	0	0	0	0	0	0	0	1	6	0	0	0	3	7	0	0	0	7
ASV_1567	0	0	0	0	0	1	0	0	8	2	8	0	1	1	0	0	0	2	0	1	0
ASV_1570	0	0	0	0	0	0	0	0	4	1	1	5	5	4	4	0	0	0	1	0	0
ASV_1571	0	0	0	0	0	0	0	0	0	0	1	0	7	0	8	0	3	1	0	5	0
ASV_1572	0	0	1	0	0	0	1	0	0	1	0	0	0	14	0	0	0	1	1	1	5
ASV_1573	0	0	0	0	0	0	0	1	13	0	3	2	1	0	1	0	1	1	1	0	1
ASV_1576	0	0	0	0	0	0	0	0	0	4	3	2	5	4	2	0	4	0	0	0	1
ASV_1577	0	0	0	0	0	0	0	0	0	0	0	0	0	0	0	2	9	6	4	0	4
ASV_1578	14	1	5	3	1	1	0	0	0	0	0	0	0	0	1	0	0	0	0	0	0
ASV_1579	1	0	0	2	0	0	1	2	1	0	2	3	3	0	2	2	0	2	0	5	0
ASV_1581	0	0	1	0	1	0	0	1	4	1	4	0	5	2	1	0	2	3	1	0	0
ASV_1582	0	1	1	5	2	11	1	3	1	1	0	0	0	0	0	0	0	0	0	0	0
ASV_1584	0	0	0	0	0	0	0	3	0	1	1	4	5	0	1	0	3	1	6	1	0
ASV_1585	0	1	0	1	0	1	0	2	1	2	3	2	2	1	1	3	1	1	1	1	2
ASV_1586	0	0	0	0	0	0	2	3	0	1	1	3	1	0	2	2	3	2	4	1	1
ASV_1587	0	0	0	0	0	0	19	6	0	0	0	0	0	0	0	0	1	0	0	0	0
ASV_1588	0	0	0	0	0	0	0	0	0	3	9	0	0	0	0	0	11	3	0	0	0
ASV_1589	0	0	0	0	0	0	0	0	0	3	6	0	2	6	0	0	4	0	1	4	0
ASV_1590	0	0	0	0	0	0	0	0	0	1	2	0	2	0	1	7	8	2	1	0	2
ASV_1591	0	0	0	0	0	0	0	0	0	2	0	0	3	10	3	3	0	1	3	0	1
ASV_1592	0	0	0	1	0	1	0	0	0	5	4	0	2	0	2	4	1	2	0	1	3
ASV_1594	0	0	0	0	0	0	0	0	0	0	1	0	0	5	4	0	2	2	3	1	8
ASV_1595	0	1	0	0	0	0	1	0	0	0	0	2	2	9	3	0	0	0	4	4	0
ASV_1596	0	0	0	0	0	0	0	0	0	0	0	3	5	4	3	3	6	1	0	0	1
ASV_1597	0	0	0	0	0	0	0	0	0	0	0	0	2	5	6	7	1	1	0	0	4
ASV_1599	2	0	1	4	2	3	4	3	2	0	0	0	0	0	0	0	0	0	0	0	0
ASV_1600	0	0	1	0	0	0	0	0	0	0	0	0	1	13	0	2	2	1	0	0	2
ASV_1601	0	0	0	0	0	0	1	0	6	5	4	1	0	0	0	0	1	1	4	0	1
ASV_1607	0	0	1	3	4	0	2	0	0	0	1	0	0	2	0	3	0	2	2	3	0
ASV_1608	0	0	0	0	0	0	0	0	0	0	0	1	0	1	15	4	0	2	0	0	0
ASV_1609	0	0	0	0	0	0	0	0	1	0	1	2	0	1	2	1	1	8	2	2	3
ASV_1610	25	0	0	0	0	0	0	0	0	0	0	0	0	0	0	0	0	0	0	0	0
ASV_1611	25	0	0	0	0	0	0	0	0	0	0	0	0	0	0	0	0	0	0	0	0
ASV_1614	3	0	1	0	0	0	0	0	2	1	5	0	3	1	2	0	2	2	2	1	0
ASV_1615	0	0	2	0	0	0	3	0	4	1	9	0	2	0	0	1	1	1	0	1	0
ASV_1616	0	1	0	0	0	0	3	1	4	2	0	0	3	0	0	0	4	1	4	1	1
ASV_1617	0	0	0	2	0	0	0	3	2	0	6	0	5	1	0	0	0	6	0	0	0
ASV_1619	0	0	0	0	2	0	0	0	1	1	1	0	2	0	7	2	4	3	0	2	0
ASV_1620	0	0	0	0	0	0	0	0	0	0	0	0	19	6	0	0	0	0	0	0	0
ASV_1621	0	0	0	0	0	0	2	0	0	0	0	0	4	2	1	0	5	1	2	5	3
ASV_1622	0	0	0	0	0	0	0	0	0	0	0	4	3	0	1	0	4	2	6	0	5
ASV_1624	0	0	0	0	0	0	0	0	0	0	0	4	1	8	1	2	0	3	5	0	1
ASV_1626	0	0	0	0	0	0	0	0	0	0	0	12	0	1	0	0	0	6	6	0	0
ASV_1628	0	0	0	0	0	0	0	0	0	0	0	0	0	3	0	0	1	0	0	21	0
ASV_1629	0	0	0	1	3	0	1	2	2	0	1	2	1	1	0	3	0	1	0	2	0
ASV_1630	0	0	0	0	0	2	0	1	0	0	0	1	3	6	4	1	3	0	1	0	1
ASV_1632	0	0	0	0	0	0	1	1	8	1	0	3	0	0	1	1	1	1	1	0	4
ASV_1633	0	0	0	0	0	0	1	0	15	6	0	0	1	0	0	0	0	0	0	0	0
ASV_1634	0	0	0	0	0	0	0	0	0	0	0	0	0	0	2	0	5	5	1	5	1
ASV_1635	0	0	0	0	0	0	0	0	0	0	0	0	0	0	0	0	0	0	0	22	1
ASV_1637	0	0	0	0	0	0	0	0	0	0	3	0	0	0	1	2	3	5	3	1	3
ASV_1638	0	0	0	0	0	0	5	0	0	3	2	2	0	2	0	1	4	1	3	0	0
ASV_1639	0	0	0	0	0	0	0	0	0	0	0	0	0	0	0	0	0	6	11	0	5
ASV_1640	0	0	0	0	0	0	0	0	0	0	0	0	0	0	0	0	1	19	1	2	0
ASV_1641	0	0	0	0	0	0	0	0	0	0	0	0	0	0	0	0	8	13	0	0	2
ASV_1643	6	0	0	0	0	0	0	0	0	1	0	0	0	0	3	2	4	3	4	1	0
ASV_1644	1	0	3	0	1	4	2	1	8	0	4	0	0	0	0	0	0	0	0	0	0
ASV_1645	0	0	0	0	2	0	0	4	0	0	0	0	0	0	0	0	0	0	7	1	10
ASV_1648	0	0	0	0	0	0	0	1	0	6	3	0	1	0	3	1	2	3	3	0	1
ASV_1650	0	0	0	0	0	0	0	0	0	3	1	0	2	6	0	1	2	6	0	2	1
ASV_1651	0	0	0	2	0	0	0	0	0	1	1	2	7	2	0	0	0	5	0	3	1
ASV_1653	0	0	0	0	0	0	0	0	0	4	7	5	3	4	0	0	1	0	0	0	0
ASV_1654	0	0	0	0	0	0	0	0	0	1	1	2	11	0	3	0	3	0	0	3	0
ASV_1655	0	0	0	0	0	0	0	0	1	3	0	0	1	0	3	0	0	4	4	6	2
ASV_1658	0	0	0	0	0	0	0	0	0	0	1	0	11	7	0	0	0	0	2	2	1
ASV_1659	0	0	0	0	0	0	0	0	1	0	1	4	0	0	0	0	6	3	3	1	5
ASV_1661	0	0	0	0	2	0	0	0	0	0	0	0	5	0	3	0	6	5	1	1	1
ASV_1663	0	0	0	0	0	0	0	0	0	0	0	0	0	0	0	4	8	1	0	10	1
ASV_1664	0	0	0	0	0	22	2	0	0	0	0	0	0	0	0	0	0	0	0	0	0
ASV_1665	0	0	0	0	0	0	0	0	1	0	0	0	0	0	0	1	0	0	16	0	6
ASV_1668	3	6	2	4	1	2	4	0	0	0	0	0	0	0	0	0	0	0	0	0	0
ASV_1670	0	0	0	0	2	1	0	0	0	1	0	4	1	1	0	1	1	6	3	1	0
ASV_1672	0	0	0	0	0	0	0	0	0	0	0	0	0	0	1	1	10	4	0	2	3
ASV_1673	0	0	0	0	0	0	0	0	1	0	0	2	1	0	2	0	0	4	10	2	0
ASV_1674	0	0	0	0	0	0	0	0	0	0	0	0	1	0	0	0	1	1	1	11	7
ASV_1677	0	0	0	0	0	0	0	1	1	7	3	0	0	1	0	1	2	6	0	0	1
ASV_1678	0	0	0	0	0	0	0	2	2	15	1	1	1	0	1	0	0	0	0	0	0
ASV_1681	0	0	0	0	0	0	0	0	1	2	1	3	2	1	0	1	2	6	0	1	3
ASV_1683	0	0	0	0	0	0	0	0	0	1	11	1	0	2	0	1	0	1	4	1	1
ASV_1686	0	0	0	0	0	0	0	0	0	0	4	2	4	1	5	0	0	7	0	0	0
ASV_1688	0	0	0	0	0	0	0	0	0	0	1	1	1	4	3	0	3	4	0	1	5
ASV_1689	0	0	0	0	0	0	0	0	0	0	1	2	2	3	1	5	1	0	5	2	1
ASV_1693	1	0	0	0	0	1	9	3	5	0	0	0	0	0	0	0	0	0	0	0	0
ASV_1694	1	0	0	4	1	0	4	0	0	2	0	0	3	0	1	0	0	1	0	3	0
ASV_1695	14	0	0	1	0	0	0	0	0	0	1	0	0	0	0	0	4	0	0	0	1
ASV_1697	4	2	0	3	2	0	0	0	0	1	0	2	0	0	1	0	0	0	1	0	1
ASV_1698	0	0	0	10	0	0	0	7	0	1	1	0	0	0	0	0	0	0	0	0	0
ASV_1699	0	0	0	0	0	1	0	2	2	0	0	0	0	0	3	0	0	7	1	2	2
ASV_1701	0	0	0	0	0	0	1	0	0	1	14	0	1	2	1	0	0	0	1	0	0
ASV_1702	0	0	0	0	0	1	3	2	2	0	1	1	0	0	1	0	5	1	1	2	1
ASV_1703	0	0	0	0	0	0	0	1	0	6	0	1	2	1	0	0	0	2	0	4	4
ASV_1704	0	0	0	0	0	0	0	0	0	0	1	0	0	0	0	2	4	6	4	1	1
ASV_1706	0	0	0	0	0	0	0	1	1	0	0	1	2	1	1	0	9	3	0	0	2
ASV_1707	0	0	0	0	0	0	0	0	0	0	0	1	0	0	0	0	1	0	2	7	9
ASV_1711	0	0	0	0	0	0	0	0	0	0	0	0	0	0	0	2	2	0	2	14	0
ASV_1712	0	0	0	0	0	0	0	0	0	0	0	0	1	0	0	1	2	4	6	4	2
ASV_1714	4	2	14	1	0	1	0	0	0	0	0	0	0	0	0	0	0	0	0	0	0
ASV_1716	0	0	0	0	0	0	12	6	4	0	0	0	0	0	0	0	0	0	0	0	0
ASV_1717	0	0	0	0	0	0	3	3	6	0	0	5	0	0	0	0	0	1	1	0	3
ASV_1719	0	0	0	0	0	0	0	0	0	1	0	3	3	1	1	1	2	2	8	0	0
ASV_1720	0	0	0	0	0	0	0	0	0	4	3	3	5	0	0	2	1	2	1	0	1
ASV_1721	0	0	0	0	0	0	0	0	2	1	0	0	1	0	2	3	1	2	1	7	2
ASV_1723	0	0	0	0	0	0	0	0	0	0	2	0	1	1	6	0	4	1	0	7	0
ASV_1725	0	0	0	0	0	0	0	0	0	0	0	1	4	3	5	1	1	3	1	1	2
ASV_1726	0	0	0	0	0	0	0	0	5	0	0	1	3	0	2	0	0	2	3	5	1
ASV_1728	0	0	0	0	0	0	0	0	0	0	0	1	0	0	0	0	0	0	14	4	3
ASV_1730	9	4	2	2	0	0	0	0	0	0	0	0	0	0	0	0	0	0	0	0	0
ASV_1731	0	0	0	0	0	0	1	0	0	2	11	0	0	1	0	1	1	3	0	0	0
ASV_1732	0	0	0	0	0	1	0	0	0	0	1	0	1	1	0	1	1	4	7	0	3
ASV_1733	0	0	0	0	1	0	4	5	0	2	2	0	0	2	0	0	1	0	1	0	2
ASV_1735	0	0	0	0	0	0	0	0	0	0	0	0	0	0	0	0	13	4	0	0	2
ASV_1737	0	0	0	0	0	0	0	0	0	1	0	0	2	0	0	0	1	11	1	1	3
ASV_1738	0	0	0	0	0	0	0	0	0	0	0	1	2	0	1	1	3	4	4	2	2
ASV_1739	0	0	0	0	0	0	0	0	6	0	0	0	1	0	2	1	0	7	0	3	0
ASV_1740	0	0	0	0	0	0	0	0	0	2	1	1	1	3	1	3	2	4	1	0	1
ASV_1741	4	0	0	1	0	1	1	12	0	0	0	0	0	0	0	1	1	0	0	0	0
ASV_1742	5	0	9	1	0	0	0	0	0	0	0	0	1	1	0	1	2	0	0	1	0
ASV_1743	2	0	0	2	0	0	6	6	0	0	0	0	0	0	1	0	3	0	1	0	0
ASV_1744	0	0	1	0	0	0	0	0	0	5	0	0	1	0	3	0	1	0	0	8	2
ASV_1746	0	0	0	0	0	0	1	2	4	1	10	0	1	0	0	0	0	0	0	0	2
ASV_1747	0	0	0	1	2	10	0	3	2	0	0	0	0	0	0	0	1	1	0	1	0
ASV_1748	0	0	0	2	0	0	0	0	0	3	7	0	0	5	0	3	0	1	0	0	0
ASV_1749	0	0	0	0	0	0	0	0	0	1	0	15	0	0	0	0	0	3	2	0	0
ASV_1750	0	0	0	0	0	0	0	0	0	1	11	0	0	9	0	0	0	0	0	0	0
ASV_1751	0	0	0	0	0	0	0	0	1	3	1	1	0	0	0	1	4	8	0	0	2
ASV_1752	0	0	0	0	0	0	0	0	1	1	1	0	0	1	5	4	2	1	0	0	5
ASV_1755	0	0	0	0	0	0	0	0	0	2	14	1	4	0	0	0	0	0	0	0	0
ASV_1756	0	0	0	1	0	0	0	0	0	4	5	5	4	0	0	1	0	0	0	1	0
ASV_1757	0	0	0	0	0	0	0	0	0	3	0	2	1	2	2	3	5	0	3	0	0
ASV_1759	0	0	0	0	0	0	0	0	0	2	3	0	1	1	2	0	0	5	2	2	3
ASV_1760	0	0	0	0	0	0	0	0	1	2	5	2	1	2	1	2	0	4	0	1	0
ASV_1763	0	0	0	0	1	0	0	0	0	0	2	4	3	1	2	2	3	2	0	1	0
ASV_1764	0	0	0	0	0	0	0	0	0	0	3	2	2	2	1	1	2	1	1	0	6
ASV_1766	0	0	0	1	0	0	0	0	2	0	1	4	1	1	1	1	0	4	2	2	1
ASV_1768	0	0	0	0	0	0	0	0	0	0	0	5	8	3	0	5	0	0	0	0	0
ASV_1770	0	0	0	0	0	0	0	0	0	0	0	0	5	1	1	0	2	1	4	3	4
ASV_1771	0	0	0	0	0	0	0	0	0	0	0	1	17	0	2	0	0	1	0	0	0
ASV_1772	0	0	0	0	0	0	0	0	0	0	0	2	3	2	1	0	0	6	3	0	4
ASV_1773	0	0	0	0	0	0	2	0	1	0	0	2	1	1	0	0	0	3	3	3	5
ASV_1775	0	0	0	0	0	0	0	0	0	0	0	2	0	0	0	2	1	3	0	13	0
ASV_1776	0	0	0	0	0	0	0	0	0	0	0	0	0	0	6	0	2	1	5	5	2
ASV_1777	0	0	0	0	0	0	0	0	0	0	0	0	0	0	0	0	7	8	0	0	6
ASV_1779	0	0	0	0	0	0	0	0	3	0	0	2	0	4	0	0	0	2	0	4	6
ASV_1780	0	0	0	0	0	0	0	0	0	0	0	0	0	0	16	0	0	0	0	0	5
ASV_1781	0	0	0	2	0	0	4	4	2	0	0	0	0	0	0	1	0	0	4	1	0
ASV_1784	0	1	1	0	0	0	1	4	2	1	0	0	0	1	1	0	0	1	1	0	0
ASV_1785	0	0	0	0	0	0	0	0	7	0	1	5	1	0	0	0	1	1	0	0	1
ASV_1787	0	0	0	0	0	0	0	0	0	3	3	0	0	3	0	2	3	0	1	2	2
ASV_1788	0	0	0	0	0	0	0	0	3	1	0	0	2	4	1	1	2	2	0	1	1
ASV_1789	0	0	0	0	0	0	0	1	1	0	2	1	1	0	0	2	1	5	1	2	1
ASV_1790	1	0	0	0	0	0	0	1	0	4	6	2	3	0	2	1	0	0	0	0	0
ASV_1792	0	0	0	0	0	0	0	2	1	3	4	0	4	3	1	0	1	1	0	0	0
ASV_1793	0	0	0	0	9	0	1	2	0	0	0	0	0	0	0	0	0	2	2	4	0
ASV_1798	0	0	0	0	0	0	1	0	0	1	1	0	9	0	5	0	1	1	0	1	0
ASV_1799	0	0	0	0	0	0	0	0	3	1	2	1	2	5	0	0	0	1	1	0	4
ASV_1800	0	0	0	0	0	0	0	0	1	0	1	0	4	4	3	2	1	1	0	3	0
ASV_1802	0	0	0	0	0	0	0	0	0	0	2	1	6	1	0	1	0	5	3	0	1
ASV_1803	0	0	0	0	0	0	0	0	0	0	2	0	0	0	2	0	7	4	2	0	3
ASV_1804	0	0	0	0	0	0	0	0	0	0	0	0	1	0	0	1	3	2	7	2	4
ASV_1806	0	0	0	0	1	0	0	0	0	0	0	0	0	0	0	0	2	1	3	2	11
ASV_1807	0	0	0	0	0	0	0	0	0	0	0	0	0	0	0	0	1	1	3	8	7
ASV_1808	0	0	0	0	0	0	0	0	0	0	0	0	0	0	0	0	0	1	2	0	17
ASV_1813	0	0	0	0	0	0	3	4	3	2	2	1	0	0	0	0	0	2	0	0	0
ASV_1814	0	0	0	4	0	0	0	1	0	0	2	5	1	0	1	1	1	2	0	0	0
ASV_1816	0	0	0	0	0	0	0	0	3	0	0	1	0	0	0	1	5	4	2	1	1
ASV_1817	0	0	0	0	0	0	0	0	0	0	0	1	0	2	0	1	0	4	5	1	2
ASV_1818	0	0	0	0	0	0	0	0	0	0	0	0	0	0	0	0	3	8	5	0	2
ASV_1819	0	0	0	0	0	0	0	0	2	0	0	3	0	0	0	0	1	6	4	0	2
ASV_1820	0	0	0	0	0	0	0	0	0	5	0	1	2	1	1	3	0	3	1	1	0
ASV_1821	0	0	0	0	0	0	0	0	0	0	0	5	1	0	0	0	1	5	6	0	0
ASV_1822	0	0	0	0	0	0	1	0	1	0	2	4	0	0	0	0	2	0	3	0	4
ASV_1824	0	0	0	0	0	0	0	0	0	0	0	0	0	0	0	0	1	12	4	0	0
ASV_1827	0	0	1	1	0	0	1	5	3	0	0	0	0	0	0	0	0	6	0	0	1
ASV_1829	1	0	0	10	0	5	0	0	3	0	0	0	0	0	0	0	0	0	0	0	0
ASV_1831	0	0	1	2	2	3	4	0	0	0	1	0	0	0	0	0	2	1	0	1	2
ASV_1834	0	0	0	0	0	0	0	0	0	2	0	0	0	12	0	0	0	2	1	0	2
ASV_1835	0	0	0	0	0	0	0	0	0	2	6	2	0	3	1	3	0	0	2	0	0
ASV_1836	0	0	0	0	0	0	0	0	5	1	3	1	1	2	0	3	0	0	2	1	0
ASV_1837	0	0	0	0	0	0	0	0	0	0	1	1	8	1	3	0	0	2	1	0	2
ASV_1840	0	0	0	0	0	0	0	0	0	0	0	0	1	2	1	0	1	0	5	8	1
ASV_1843	0	0	0	0	0	0	0	0	0	0	0	0	3	10	1	2	0	0	0	2	1
ASV_1845	0	0	0	0	0	0	0	0	0	0	0	1	8	9	1	0	0	0	0	0	0
ASV_1846	0	0	0	0	0	0	0	0	0	0	0	0	0	0	0	3	10	6	0	0	0
ASV_1847	0	0	0	0	0	0	0	0	0	0	0	0	0	1	0	0	5	13	0	0	0
ASV_1849	0	0	0	0	0	0	0	0	0	0	0	0	0	0	0	0	0	2	2	14	1
ASV_1850	0	0	0	0	0	0	0	0	0	0	0	0	0	1	11	2	1	1	1	2	0
ASV_1851	0	0	0	0	0	0	0	0	0	0	0	0	0	0	0	1	6	8	2	0	2
ASV_1852	0	0	0	0	3	0	0	0	0	0	0	0	0	0	0	0	1	1	9	1	4
ASV_1853	0	0	0	0	0	0	3	0	16	0	0	0	0	0	0	0	0	0	0	0	0
ASV_1854	0	0	0	0	0	0	0	0	0	0	0	0	0	8	1	10	0	0	0	0	0
ASV_1855	0	0	0	0	0	0	0	0	1	0	0	1	0	0	2	0	3	0	8	2	2
ASV_1858	0	0	0	0	4	0	2	9	0	0	0	0	0	0	0	0	0	0	0	0	0
ASV_1859	1	0	0	0	10	0	0	0	0	0	0	2	0	0	0	0	1	1	0	0	1
ASV_1860	0	0	0	1	0	1	1	8	4	0	0	0	0	0	0	0	0	0	0	0	0
ASV_1865	0	0	0	0	0	0	0	0	0	0	0	1	0	0	1	0	4	2	4	3	2
ASV_1866	0	0	0	0	0	0	0	0	0	0	1	0	0	0	4	1	1	9	0	1	0
ASV_1868	0	0	0	0	0	0	0	0	0	0	0	3	5	1	5	0	0	0	1	2	0
ASV_1871	2	0	2	0	1	2	4	2	0	0	0	0	1	0	0	0	3	0	0	1	0
ASV_1872	0	0	1	0	0	0	0	0	0	0	0	0	0	2	2	1	0	1	0	10	1
ASV_1874	0	0	0	0	0	0	5	2	9	0	0	0	0	1	0	0	0	0	0	0	1
ASV_1876	0	1	0	7	0	3	0	1	0	0	1	1	0	0	0	0	0	2	1	0	1
ASV_1877	0	0	0	0	0	0	0	0	0	1	0	0	0	0	1	1	3	8	3	1	0
ASV_1878	0	0	0	0	0	0	0	0	4	1	5	2	0	0	0	3	0	0	0	1	2
ASV_1879	0	0	0	0	0	0	0	0	0	1	1	0	3	5	2	2	1	1	0	1	1
ASV_1880	0	0	0	0	0	0	0	0	0	4	0	0	0	3	3	0	2	0	0	6	0
ASV_1882	0	0	0	0	0	0	0	0	0	3	0	1	2	6	0	0	1	1	1	3	0
ASV_1884	0	1	0	0	0	0	0	0	1	0	6	1	0	0	1	0	4	3	0	1	0
ASV_1885	0	0	0	0	0	0	0	0	0	0	1	1	0	3	2	0	0	3	4	0	4
ASV_1889	0	0	0	1	0	0	0	0	0	0	0	0	1	0	3	0	7	0	2	4	0
ASV_1890	0	0	0	1	0	0	0	0	0	0	0	1	2	3	2	0	1	5	2	1	0
ASV_1893	0	0	0	0	0	0	0	0	0	0	0	2	1	1	6	1	0	1	1	5	0
ASV_1895	0	0	0	0	0	0	0	0	1	0	0	0	0	0	1	2	0	0	7	3	4
ASV_1898	1	0	0	0	2	3	0	0	0	0	0	1	0	0	0	0	0	1	1	1	3
ASV_1902	0	0	0	3	2	1	0	6	2	0	0	0	0	1	0	0	0	0	0	0	0
ASV_1904	0	0	0	0	0	0	0	0	0	0	0	0	0	0	0	1	5	2	1	4	3
ASV_1907	0	0	0	0	0	0	0	0	0	0	0	0	0	0	0	0	0	0	7	6	3
ASV_1910	0	0	0	0	0	0	0	0	0	0	0	2	3	7	1	0	0	0	1	0	2
ASV_1911	0	0	0	0	0	0	0	0	0	0	0	0	0	1	1	2	3	6	1	0	2
ASV_1913	1	0	0	0	0	0	0	0	0	0	0	0	2	0	4	1	4	1	0	2	1
ASV_1914	0	0	0	1	0	0	0	0	0	0	0	0	0	0	0	0	1	11	1	0	0
ASV_1915	0	0	0	4	0	0	1	2	0	0	0	0	0	0	0	0	0	3	1	1	4
ASV_1917	0	0	0	0	0	0	0	0	1	0	1	0	2	0	0	3	2	4	1	2	0
ASV_1918	0	0	0	0	0	0	0	0	0	0	0	1	0	0	4	1	0	0	5	5	0
ASV_1920	0	0	0	1	1	1	2	0	0	0	3	2	1	1	2	0	0	0	2	0	0
ASV_1921	0	0	0	0	0	0	0	0	0	0	0	2	1	2	0	0	0	6	2	0	3
ASV_1922	0	0	0	0	0	0	0	0	1	1	1	0	0	3	2	1	1	1	0	5	0
ASV_1923	1	0	0	0	0	0	0	1	1	2	0	2	0	3	0	1	1	1	0	3	0
ASV_1924	12	5	0	0	0	0	0	0	0	0	0	0	0	0	0	0	0	0	0	0	0
ASV_1926	0	1	2	2	0	9	1	0	0	0	1	0	0	0	0	0	0	0	0	0	1
ASV_1927	0	0	0	0	3	0	0	1	0	0	0	3	6	2	0	0	0	0	0	2	0
ASV_1929	0	0	0	0	0	0	0	0	0	1	2	0	1	1	0	0	0	8	0	1	3
ASV_1930	0	0	0	0	0	0	0	0	0	3	2	2	0	1	0	0	3	6	0	0	0
ASV_1931	0	0	0	0	0	0	0	0	0	3	8	0	3	2	0	0	0	1	0	0	0
ASV_1932	0	0	0	0	0	0	0	0	0	2	0	0	2	2	2	5	2	0	0	2	0
ASV_1933	0	0	0	0	0	0	0	0	0	4	2	2	1	0	1	7	0	0	0	0	0
ASV_1934	0	0	0	0	0	0	0	0	0	1	0	0	0	1	3	1	0	2	0	9	0
ASV_1936	0	0	0	0	0	0	0	0	0	0	3	2	3	9	0	0	0	0	0	0	0
ASV_1937	0	0	0	0	0	0	0	0	0	0	1	1	0	1	0	4	3	4	0	3	0
ASV_1938	0	0	0	0	0	0	0	0	0	0	1	0	0	0	5	2	0	1	1	0	7
ASV_1939	0	0	0	0	0	0	0	0	0	0	2	0	6	0	1	1	0	0	3	1	3
ASV_1940	0	0	0	0	0	0	0	0	0	0	1	2	0	1	4	0	5	2	2	0	0
ASV_1943	0	0	0	0	0	0	0	0	0	0	0	0	3	2	0	0	3	7	1	1	0
ASV_1945	0	0	0	0	0	0	0	0	0	0	0	0	2	1	6	3	0	2	0	3	0
ASV_1946	0	0	0	0	0	0	0	0	0	0	0	2	4	4	4	0	0	0	0	2	1
ASV_1947	0	0	0	0	0	0	0	0	0	0	0	0	2	0	2	2	1	7	0	3	0
ASV_1949	0	0	0	0	0	0	0	0	0	0	0	1	2	2	0	1	5	0	4	0	2
ASV_1950	0	0	0	0	0	0	0	0	0	0	0	0	0	0	0	0	0	13	0	0	4
ASV_1956	1	0	2	10	1	0	1	0	0	0	0	0	0	0	0	0	0	0	0	0	0
ASV_1957	0	0	1	0	2	2	0	4	0	0	0	0	0	0	1	0	0	0	0	1	4
ASV_1959	0	0	0	0	0	0	0	1	2	2	1	1	1	0	0	1	0	2	3	0	1
ASV_1960	0	0	0	1	0	0	4	0	10	0	0	0	0	0	0	0	0	0	0	0	0
ASV_1961	1	1	1	2	0	0	2	0	0	0	2	0	1	0	0	0	1	1	0	2	1
ASV_1962	0	0	0	0	0	0	1	0	8	0	1	0	1	0	0	1	1	0	1	0	0
ASV_1964	0	0	0	0	0	0	0	0	0	0	0	1	1	0	0	1	1	9	0	1	1
ASV_1966	0	0	0	0	0	0	0	0	0	1	0	1	2	2	1	2	5	0	1	0	0
ASV_1967	0	0	0	0	0	0	0	0	1	3	4	3	0	0	0	0	1	0	2	0	1
ASV_1968	0	0	0	0	0	0	0	0	0	0	0	0	0	0	0	0	2	0	2	7	2
ASV_1969	0	0	0	0	0	0	0	0	0	0	0	0	0	0	0	0	0	0	0	14	0
ASV_1970	0	0	0	0	0	0	0	0	0	0	0	0	2	0	0	1	1	1	6	1	2
ASV_1972	0	0	0	0	0	0	0	0	1	0	0	0	1	1	10	1	0	1	0	0	0
ASV_1973	0	0	0	0	0	0	0	0	0	0	0	0	0	0	0	0	3	3	0	6	1
ASV_1974	0	0	0	0	0	0	0	0	0	0	0	0	2	0	4	0	0	0	0	5	3
ASV_1975	0	0	0	0	0	0	2	0	0	2	0	0	1	0	0	0	1	6	1	1	1
ASV_1976	0	0	0	0	0	0	0	0	0	1	0	0	0	0	5	2	5	0	0	2	0
ASV_1977	0	0	0	0	0	0	0	0	0	0	0	0	1	0	0	0	0	2	7	0	5
ASV_1978	0	0	0	0	0	0	0	1	0	0	0	0	1	0	0	0	1	0	0	9	0
ASV_1986	0	0	0	3	4	3	1	1	1	0	0	1	0	0	0	1	0	0	0	1	0
ASV_1987	0	0	0	0	0	0	1	1	0	1	2	1	0	0	1	0	3	3	3	0	0
ASV_1990	0	0	0	0	6	0	5	4	0	0	0	0	0	0	1	0	0	0	0	0	0
ASV_1991	0	0	0	0	0	0	0	0	0	5	0	1	2	0	3	4	1	0	0	0	0
ASV_1993	0	0	0	0	0	0	0	0	0	3	0	3	1	2	0	0	0	4	0	0	3
ASV_1994	0	0	0	0	0	0	0	0	0	1	3	0	4	0	2	3	0	0	0	3	0
ASV_1996	0	0	0	0	0	0	0	0	0	0	2	1	0	0	0	0	0	4	6	3	0
ASV_1998	0	0	0	0	0	0	0	0	0	0	4	0	4	4	3	0	0	0	0	0	1
ASV_2000	0	0	0	0	0	0	0	0	0	0	2	0	0	1	0	1	1	0	0	11	0
ASV_2001	0	0	0	0	0	0	0	0	0	0	3	1	2	0	1	0	1	0	5	3	0
ASV_2002	0	0	0	0	0	0	0	0	0	0	5	5	0	2	0	4	0	0	0	0	0
ASV_2003	0	0	0	0	0	0	0	0	0	0	0	1	4	2	3	2	1	1	1	0	1
ASV_2004	0	0	0	0	0	0	0	0	0	0	0	0	4	2	0	0	1	2	1	6	0
ASV_2006	0	0	0	0	0	0	0	0	0	0	0	4	1	0	1	1	1	0	5	2	1
ASV_2007	0	0	0	0	0	0	0	0	0	0	0	0	2	2	1	0	0	1	2	7	1
ASV_2008	0	0	0	0	0	0	0	0	0	0	0	1	1	7	3	1	2	1	0	0	0
ASV_2009	0	0	0	0	0	0	0	0	0	0	0	0	0	1	6	2	3	1	1	1	1
ASV_2010	0	0	0	0	0	0	0	0	0	0	0	4	0	1	1	0	2	3	1	1	3
ASV_2012	0	0	0	0	0	0	0	0	0	0	0	13	0	0	0	0	1	1	1	0	0
ASV_2013	0	0	0	0	0	0	0	0	0	0	0	0	0	0	0	3	2	4	1	0	6
ASV_2014	0	0	0	0	0	0	0	0	0	0	0	2	0	1	0	0	1	6	4	0	2
ASV_2018	0	0	0	0	0	0	0	0	0	0	0	0	0	0	1	0	3	4	7	0	1
ASV_2019	0	0	0	0	0	0	0	0	0	0	0	0	0	0	1	0	2	1	2	7	3
ASV_2020	0	0	0	0	0	0	0	0	4	0	0	0	0	0	4	0	1	0	2	5	0
ASV_2021	0	0	0	0	0	0	0	0	0	0	0	0	0	0	0	0	0	0	0	16	0
ASV_2023	0	0	0	0	0	0	0	0	0	0	0	0	0	0	0	0	3	0	0	9	4
ASV_2024	0	0	0	0	0	1	0	1	1	0	1	0	1	0	3	0	0	0	1	2	1
ASV_2026	0	0	0	0	0	0	0	0	0	0	0	0	0	0	0	1	2	5	1	1	2
ASV_2027	0	0	1	0	0	0	0	0	2	0	0	0	0	0	2	0	2	4	0	0	2
ASV_2028	1	0	1	0	1	0	0	0	1	1	0	0	0	0	1	1	2	1	0	1	1
ASV_2033	0	0	1	0	0	0	0	0	0	0	0	0	3	1	3	1	0	0	0	4	0
ASV_2034	0	0	0	0	0	0	0	0	0	0	0	0	2	1	0	0	1	1	5	0	3
ASV_2036	0	0	0	0	0	0	0	0	0	1	0	0	9	0	0	0	1	0	0	2	1
ASV_2039	1	0	8	3	0	0	0	0	0	0	0	0	1	0	1	0	0	0	0	1	0
ASV_2040	3	1	6	0	1	0	0	2	0	0	0	1	0	0	0	0	0	0	0	1	0
ASV_2042	1	0	0	0	0	0	1	1	0	2	2	1	1	2	0	0	0	1	3	0	0
ASV_2045	0	0	0	0	1	0	2	1	1	0	1	1	0	0	0	0	0	0	6	2	0
ASV_2046	0	0	0	0	0	0	2	1	4	1	0	0	0	1	0	0	0	3	0	0	3
ASV_2047	0	0	0	0	1	0	6	3	4	1	0	0	0	0	0	0	0	0	0	0	0
ASV_2048	0	0	0	1	0	0	1	0	0	3	1	0	0	2	0	1	1	0	1	2	2
ASV_2049	0	0	0	0	0	0	0	0	0	1	0	5	0	0	0	0	0	8	0	0	1
ASV_2052	0	0	0	0	0	0	0	0	0	0	1	1	6	0	1	1	0	1	0	1	3
ASV_2054	0	0	0	0	0	0	0	0	0	0	1	1	1	0	0	1	0	4	6	1	0
ASV_2055	0	0	0	0	0	0	1	0	2	0	1	1	2	0	0	0	0	0	6	2	0
ASV_2056	0	0	0	0	0	0	0	0	0	0	2	0	0	0	3	2	1	0	2	1	4
ASV_2057	0	0	0	0	0	0	0	0	0	0	0	0	1	1	1	0	0	1	10	1	0
ASV_2058	0	0	0	0	0	0	0	0	0	0	0	0	3	0	0	0	2	1	0	0	9
ASV_2059	0	0	0	0	0	0	0	0	1	0	0	0	1	0	0	0	8	0	1	4	0
ASV_2060	0	10	0	0	0	0	0	0	0	0	0	0	1	0	2	0	0	1	0	1	0
ASV_2062	0	0	0	0	0	0	0	0	0	0	0	0	0	0	0	1	3	3	6	1	1
ASV_2063	0	0	0	0	0	0	0	0	0	0	0	0	0	0	0	0	3	5	4	0	3
ASV_2064	0	0	0	1	8	4	1	0	0	0	0	0	0	1	0	0	0	0	0	0	0
ASV_2065	0	0	0	0	0	0	0	0	0	0	0	0	0	1	14	0	0	0	0	0	0
ASV_2066	0	0	0	0	0	0	0	0	9	0	0	1	0	0	0	0	0	0	3	0	2
ASV_2067	0	0	0	0	0	0	0	0	0	0	0	0	0	0	9	0	0	0	2	4	0
ASV_2069	0	0	0	2	0	3	3	3	0	0	0	1	0	0	0	0	1	0	0	0	0
ASV_2070	0	0	0	0	0	0	0	0	0	0	1	3	0	3	3	0	0	0	0	1	1
ASV_2073	0	0	0	0	0	0	0	0	0	0	0	0	0	0	0	0	1	8	3	1	0
ASV_2075	0	0	0	0	0	0	0	0	0	0	0	0	1	0	3	2	0	0	0	7	0
ASV_2076	0	0	0	0	0	1	0	0	0	6	1	0	0	1	1	1	0	2	0	0	0
ASV_2077	0	0	0	0	0	0	0	0	0	0	0	0	0	0	1	3	2	6	0	0	1
ASV_2078	0	0	0	0	0	0	2	1	0	1	0	1	0	1	0	2	1	0	2	1	1
ASV_2079	0	0	0	0	0	0	0	0	0	1	1	0	0	0	0	0	0	0	9	1	1
ASV_2082	0	0	0	0	0	0	0	0	0	0	0	0	2	3	0	0	0	1	4	2	1
ASV_2083	4	0	3	0	0	0	0	0	1	0	0	0	0	0	0	0	0	0	1	3	1
ASV_2085	2	0	4	0	0	0	1	0	0	1	1	0	1	0	0	1	0	0	1	1	1
ASV_2086	1	0	0	1	0	1	1	8	0	0	0	1	0	0	0	0	0	0	0	1	0
ASV_2088	0	0	1	0	0	0	0	0	0	0	1	0	0	4	3	3	1	0	1	0	0
ASV_2089	0	0	1	0	0	0	0	1	0	0	4	0	2	1	1	0	0	0	0	4	0
ASV_2092	0	0	0	0	0	0	0	1	1	1	4	3	3	1	0	0	0	0	0	0	0
ASV_2094	0	0	0	0	0	0	0	1	1	2	1	1	3	0	2	0	0	2	0	1	0
ASV_2095	0	0	0	0	0	0	0	3	0	1	1	0	0	0	0	0	0	2	5	2	0
ASV_2096	0	0	0	0	1	0	0	3	2	0	2	0	0	1	0	1	1	1	0	2	0
ASV_2097	0	0	0	0	0	1	0	1	0	0	2	2	0	0	0	0	1	4	2	0	1
ASV_2099	0	0	0	0	0	0	0	0	0	6	1	1	1	2	1	0	2	0	0	0	0
ASV_2100	0	0	0	0	0	0	2	0	2	1	1	0	1	0	2	0	0	5	0	0	0
ASV_2101	0	0	0	0	0	0	0	0	0	2	4	2	0	2	0	1	3	0	0	0	0
ASV_2102	0	0	0	0	0	0	0	0	1	8	2	3	0	0	0	0	0	0	0	0	0
ASV_2105	0	0	0	0	0	0	0	0	0	0	1	5	1	2	2	1	1	1	0	0	0
ASV_2106	0	0	0	0	0	0	0	0	0	0	1	0	0	0	0	2	0	5	0	0	6
ASV_2107	0	0	0	0	0	0	0	0	0	0	2	0	5	1	3	0	1	1	0	1	0
ASV_2108	0	0	0	0	0	0	0	0	0	0	5	1	4	1	1	1	0	0	0	1	0
ASV_2111	0	0	0	0	0	0	0	0	0	0	0	1	4	0	0	0	0	3	0	6	0
ASV_2112	0	0	0	0	0	0	0	0	1	0	0	0	3	0	1	0	0	0	2	4	3
ASV_2113	0	0	0	0	0	0	0	0	0	0	0	0	1	0	0	0	1	1	2	5	4
ASV_2115	0	0	0	0	0	0	0	0	0	0	0	2	3	3	1	2	0	0	1	0	2
ASV_2117	0	0	0	0	1	0	0	0	1	0	0	0	1	1	1	1	1	4	2	0	1
ASV_2118	0	0	0	0	0	0	0	0	0	0	0	0	1	0	0	0	6	1	2	1	3
ASV_2119	0	0	0	0	0	0	0	0	1	0	0	0	1	0	1	0	0	0	0	11	0
ASV_2121	0	0	0	0	0	0	0	0	0	0	0	0	6	3	1	3	0	1	0	0	0
ASV_2123	0	0	0	0	0	0	0	0	0	0	0	0	0	0	0	0	6	5	2	1	0
ASV_2125	0	0	0	0	0	0	0	0	1	0	0	1	0	4	0	0	2	3	3	0	0
ASV_2126	0	0	0	0	0	0	0	0	0	0	0	0	0	1	1	1	1	4	0	0	6
ASV_2128	0	0	0	0	0	0	0	0	0	0	0	0	0	4	0	0	3	5	2	0	0
ASV_2129	0	0	0	0	0	0	0	0	0	0	0	0	0	8	0	0	0	5	1	0	0
ASV_2132	0	0	0	0	0	0	0	0	0	0	0	0	0	0	0	0	1	0	1	12	0
ASV_2136	0	0	0	0	0	0	0	0	0	0	0	0	0	0	14	0	0	0	0	0	0
ASV_2137	0	0	0	0	0	0	0	0	0	0	0	0	0	0	0	14	0	0	0	0	0
ASV_2139	1	1	1	2	2	2	3	0	0	0	0	0	0	0	0	0	0	0	0	0	0
ASV_2141	2	1	2	4	2	1	0	0	0	0	0	0	0	0	0	0	0	0	0	0	0
ASV_2142	0	0	0	0	0	0	0	0	0	0	0	0	2	0	1	1	0	0	0	7	1
ASV_2143	0	0	0	0	0	0	0	0	12	0	0	0	0	0	0	0	0	0	0	0	0
ASV_2144	0	0	0	0	0	0	0	0	0	0	2	3	0	5	0	1	0	0	1	0	0
ASV_2145	0	0	0	0	0	0	0	0	0	0	0	0	0	0	0	0	2	2	4	1	3
ASV_2146	0	0	0	0	0	0	0	0	0	0	0	0	0	0	2	2	2	1	2	2	1
ASV_2149	0	0	0	0	0	0	0	0	0	1	0	3	1	0	0	0	1	0	1	2	2
ASV_2150	0	0	0	0	0	0	0	0	0	1	0	0	2	0	1	0	2	0	1	2	1
ASV_2153	2	2	4	0	1	4	0	0	0	0	0	0	0	0	0	0	0	0	0	0	0
ASV_2155	13	0	0	0	0	0	0	0	0	0	0	0	0	0	0	0	0	0	0	0	0
ASV_2158	0	0	0	1	0	0	1	11	0	0	0	0	0	0	0	0	0	0	0	0	0
ASV_2159	0	0	0	0	0	0	2	3	1	0	0	1	1	0	0	0	2	1	0	2	0
ASV_2161	0	0	0	0	0	0	3	0	0	1	0	0	1	0	2	3	2	1	0	0	0
ASV_2163	0	0	0	0	0	0	0	0	0	1	3	6	0	0	0	0	0	3	0	0	0
ASV_2168	0	0	0	0	0	0	0	0	0	0	1	3	0	1	0	1	0	0	7	0	0
ASV_2169	0	0	0	0	0	0	0	0	0	0	1	0	0	0	2	1	1	4	1	3	0
ASV_2171	0	0	0	1	0	0	1	0	0	0	0	3	3	2	1	2	0	0	0	0	0
ASV_2175	0	0	0	0	0	2	0	0	0	0	0	0	1	0	0	0	2	4	3	0	1
ASV_2177	0	0	0	0	0	0	0	0	0	0	0	0	1	0	1	0	0	3	5	0	3
ASV_2178	0	0	0	0	3	0	0	0	1	0	0	0	1	0	0	0	3	3	1	1	0
ASV_2180	0	0	0	0	0	0	0	0	0	0	0	1	1	0	1	1	0	0	2	7	0
ASV_2181	0	0	0	0	0	0	0	0	0	0	0	1	5	1	0	0	6	0	0	0	0
ASV_2183	0	0	0	0	0	0	0	0	0	0	0	0	0	0	0	0	0	2	5	0	6
ASV_2184	0	0	0	0	0	0	0	0	0	0	0	0	0	2	0	1	2	2	0	1	5
ASV_2186	0	0	0	0	0	0	0	0	0	0	0	0	0	5	3	0	1	1	1	1	1
ASV_2191	0	0	0	0	0	0	0	0	0	0	0	1	0	2	3	0	4	0	1	2	0
ASV_2192	0	0	0	0	0	0	0	0	0	0	0	0	0	1	1	0	0	0	0	11	0
ASV_2196	0	0	0	2	0	0	0	5	0	0	0	0	0	0	0	1	0	1	0	1	0
ASV_2199	0	0	0	0	0	0	1	0	0	0	0	2	2	1	1	0	1	0	2	0	1
ASV_2201	0	1	0	0	0	0	0	0	0	0	0	1	0	0	0	0	3	4	0	0	2
ASV_2203	0	0	0	0	0	0	0	0	0	0	0	8	1	0	0	0	0	0	1	1	0
ASV_2204	0	0	0	0	0	0	2	2	1	0	0	0	0	0	0	1	0	3	2	0	0
ASV_2206	0	0	0	0	0	0	0	0	0	0	0	1	0	0	1	0	1	2	4	0	2
ASV_2207	0	0	0	0	0	0	1	0	0	0	0	0	6	0	0	0	0	2	0	1	1
ASV_2212	1	0	0	0	0	1	2	5	2	0	0	0	0	0	0	0	0	0	0	1	0
ASV_2213	1	0	0	0	0	0	1	0	3	0	0	0	0	0	1	0	0	1	3	1	1
ASV_2215	0	0	1	0	0	0	0	0	0	0	0	0	0	0	2	9	0	0	0	0	0
ASV_2219	0	0	0	0	0	0	1	5	0	0	0	0	0	0	0	0	3	0	0	1	2
ASV_2222	0	0	0	0	0	0	2	2	0	3	1	0	1	1	0	0	1	0	1	0	0
ASV_2223	0	0	0	0	0	0	0	2	0	5	1	1	1	0	0	2	0	0	0	0	0
ASV_2226	0	0	0	0	0	0	0	0	0	1	0	0	1	2	3	2	0	2	0	1	0
ASV_2227	0	0	0	0	0	0	0	0	3	1	1	0	0	0	1	1	2	1	2	0	0
ASV_2228	0	0	0	0	0	0	0	0	2	3	1	1	0	3	0	0	0	1	1	0	0
ASV_2231	0	0	0	0	0	0	0	0	0	1	0	0	8	2	0	0	0	0	0	0	1
ASV_2234	0	0	0	0	0	0	0	0	0	0	4	7	0	1	0	0	0	0	0	0	0
ASV_2235	0	0	0	0	0	0	0	0	0	0	1	0	4	2	0	0	3	2	0	0	0
ASV_2236	0	0	0	0	0	0	0	0	0	0	3	1	0	4	0	1	2	1	0	0	0
ASV_2239	0	0	0	0	0	0	0	0	0	0	0	0	2	3	1	1	0	0	0	1	4
ASV_2241	0	0	0	0	0	0	0	0	0	0	0	0	1	1	0	1	2	2	1	2	2
ASV_2243	0	0	0	0	0	0	0	0	0	0	0	0	3	1	4	0	0	0	0	4	0
ASV_2244	0	0	0	0	0	1	0	0	0	0	0	0	1	1	1	0	1	0	5	1	1
ASV_2248	0	0	0	0	0	0	0	0	0	0	0	0	1	1	7	0	0	0	0	3	0
ASV_2250	0	0	0	0	0	0	0	0	0	0	0	0	0	0	0	0	2	5	4	0	1
ASV_2251	0	0	0	0	0	0	0	0	0	0	0	0	0	0	1	0	3	1	3	0	4
ASV_2252	0	0	0	0	0	0	0	0	0	0	0	1	0	0	0	0	1	9	1	0	0
ASV_2253	0	0	0	0	0	0	0	0	0	0	0	0	0	0	0	0	2	4	3	0	3
ASV_2257	0	0	0	0	0	0	0	0	0	0	0	0	0	0	8	0	0	0	1	3	0
ASV_2259	0	0	0	0	0	0	0	0	0	0	0	0	0	0	0	0	2	0	1	8	1
ASV_2260	0	0	0	0	0	0	0	0	0	0	0	0	0	0	0	2	9	0	0	1	0
ASV_2261	0	0	0	0	1	0	0	0	0	0	0	0	1	1	0	0	1	0	0	3	0
ASV_2262	0	0	0	1	4	0	0	1	0	0	0	0	0	0	0	0	0	0	0	0	0
ASV_2264	0	1	0	0	0	0	0	0	3	2	0	1	0	0	0	0	3	0	0	0	0
ASV_2266	0	0	0	0	0	0	0	0	0	0	3	2	0	0	2	0	1	1	0	0	0
ASV_2267	0	0	0	0	0	0	0	0	0	0	0	0	2	2	3	1	0	0	1	0	1
ASV_2268	0	0	0	0	0	0	0	0	0	0	0	0	0	0	0	2	6	0	0	0	2
ASV_2269	0	0	0	0	0	0	0	0	0	0	1	0	0	0	0	0	2	0	2	3	2
ASV_2270	0	0	0	0	0	0	0	0	0	0	0	0	0	0	0	0	1	2	0	2	5
ASV_2271	0	0	0	0	0	0	0	0	0	0	0	0	1	0	0	0	4	0	3	0	1
ASV_2272	0	0	0	0	1	0	0	0	0	0	1	1	0	0	0	0	0	4	1	0	2
ASV_2274	2	0	1	3	2	3	0	0	0	0	0	0	0	0	0	0	0	0	0	0	0
ASV_2279	11	0	0	0	0	0	0	0	0	0	0	0	0	0	0	0	0	0	0	0	0
ASV_2280	0	0	0	0	0	0	1	1	0	0	0	0	3	0	1	2	0	1	0	2	0
ASV_2283	0	0	0	0	0	0	0	1	0	0	0	0	0	0	1	0	0	1	0	4	4
ASV_2286	0	0	0	0	0	0	0	0	0	1	1	0	1	0	0	0	0	3	0	2	3
ASV_2288	0	0	0	0	0	0	0	0	0	1	5	1	0	0	1	0	1	1	1	0	0
ASV_2289	0	0	0	0	0	0	0	0	0	6	3	0	0	0	1	0	0	0	0	1	0
ASV_2290	0	0	0	0	0	0	0	0	0	4	1	0	1	0	0	2	1	1	0	1	0
ASV_2291	0	0	0	0	0	0	0	0	0	5	3	2	0	0	0	0	0	0	1	0	0
ASV_2292	0	0	0	0	0	0	0	0	5	2	0	0	0	0	0	0	1	1	2	0	0
ASV_2293	0	0	0	0	0	1	0	0	0	1	0	0	0	3	0	0	2	3	1	0	0
ASV_2294	0	0	0	0	0	0	0	0	0	0	1	0	4	2	0	0	0	0	1	1	2
ASV_2296	0	0	0	0	0	0	0	0	0	0	1	1	0	0	1	1	1	0	0	3	3
ASV_2302	0	0	0	0	0	0	0	0	0	0	0	0	5	0	1	0	2	2	1	0	0
ASV_2304	0	0	0	0	0	0	0	0	0	0	0	0	2	0	0	1	3	1	2	0	2
ASV_2305	0	0	0	0	0	0	0	0	0	0	0	0	1	2	0	0	1	4	1	0	2
ASV_2307	0	0	0	0	0	0	0	0	0	0	0	0	1	0	3	0	3	0	0	4	0
ASV_2308	0	0	0	0	0	0	0	0	0	0	0	0	0	0	0	0	0	1	2	5	3
ASV_2310	0	0	0	0	0	0	0	0	0	0	0	0	0	0	0	0	0	9	2	0	0
ASV_2311	0	0	0	0	0	0	0	0	0	0	0	2	0	0	0	0	2	3	1	2	1
ASV_2313	0	0	0	0	0	0	1	0	0	0	0	1	0	5	0	1	0	1	2	0	0
ASV_2316	0	0	0	0	0	0	0	0	0	0	0	1	0	0	0	1	5	2	0	2	0
ASV_2320	0	0	0	0	0	0	0	0	0	0	0	0	0	0	0	0	6	0	1	3	1
ASV_2322	0	0	0	0	0	0	0	0	0	0	0	0	0	0	0	0	8	0	1	2	0
ASV_2326	1	0	2	0	0	0	1	2	0	0	0	0	0	0	0	1	0	0	0	1	0
ASV_2327	0	2	2	3	1	1	0	0	0	0	0	0	0	0	0	0	0	0	0	0	0
ASV_2332	0	0	0	0	0	1	0	0	0	0	0	0	1	0	2	3	0	1	0	0	1
ASV_2334	0	0	0	0	0	0	0	0	0	0	0	0	0	0	5	1	0	0	0	3	0
ASV_2336	0	0	0	0	0	0	0	0	5	0	0	0	0	0	0	0	0	0	0	0	4
ASV_2337	0	0	0	0	0	0	0	0	0	0	0	1	0	0	0	0	5	3	0	0	0
ASV_2339	0	0	0	0	0	0	0	0	0	0	0	5	0	0	0	0	0	1	2	0	1
ASV_2342	7	0	1	0	0	0	0	1	1	0	0	0	0	0	0	0	0	0	0	0	0
ASV_2345	3	3	1	0	0	0	0	0	0	0	0	0	1	0	2	0	0	0	0	0	0
ASV_2347	0	0	1	3	2	3	0	0	0	0	0	0	0	0	0	0	0	0	0	0	1
ASV_2348	0	0	1	0	0	0	0	3	0	1	0	0	0	1	1	0	1	1	1	0	0
ASV_2352	0	0	0	0	0	0	1	2	0	0	1	0	0	2	0	1	1	1	1	0	0
ASV_2353	0	0	0	0	0	0	0	1	1	5	1	0	0	0	1	1	0	0	0	0	0
ASV_2355	0	0	0	0	0	0	0	0	0	8	2	0	0	0	0	0	0	0	0	0	0
ASV_2356	0	0	0	0	0	0	0	0	0	1	3	0	0	1	0	2	3	0	0	0	0
ASV_2357	0	0	0	0	0	0	0	0	0	1	4	1	2	1	0	0	1	0	0	0	0
ASV_2358	0	0	0	0	0	0	0	0	0	1	0	1	1	2	4	0	0	0	0	0	1
ASV_2360	0	0	0	0	0	0	0	0	0	0	8	0	1	0	0	0	1	0	0	0	0
ASV_2362	0	0	0	0	0	0	0	0	0	0	1	0	0	2	0	0	0	0	0	0	7
ASV_2365	0	0	0	0	0	0	0	0	0	0	6	1	3	0	0	0	0	0	0	0	0
ASV_2366	0	0	0	0	0	0	0	0	0	0	10	0	0	0	0	0	0	0	0	0	0
ASV_2367	0	0	0	0	0	0	0	0	0	0	0	6	1	2	0	0	0	0	0	1	0
ASV_2370	0	0	0	0	0	0	0	0	0	0	0	0	4	0	2	2	0	0	0	1	1
ASV_2371	0	0	0	0	0	0	0	0	0	0	0	1	1	0	0	2	1	1	3	0	1
ASV_2372	0	0	0	0	0	0	0	0	0	0	0	0	3	0	0	0	4	1	1	0	1
ASV_2375	0	0	0	0	0	0	0	0	0	0	0	0	1	0	1	0	0	1	2	3	2
ASV_2376	0	0	0	0	0	0	0	0	0	0	0	0	2	0	3	0	0	0	3	2	0
ASV_2377	0	0	0	0	0	0	0	0	0	0	0	1	1	1	1	3	1	0	1	0	1
ASV_2379	0	0	0	0	0	0	0	0	0	0	0	0	0	2	1	1	0	3	0	2	1
ASV_2380	0	0	0	2	3	4	0	0	0	0	0	0	0	0	1	0	0	0	0	0	0
ASV_2381	0	0	0	0	7	0	0	0	0	0	0	0	0	0	1	0	1	0	0	1	0
ASV_2384	0	0	0	0	0	0	0	0	0	0	0	0	0	1	1	0	0	0	0	6	2
ASV_2385	0	0	0	0	0	0	0	0	0	0	0	0	0	0	0	0	0	0	0	10	0
ASV_2387	0	0	0	0	1	0	0	0	1	0	0	0	1	0	1	0	0	0	0	0	0
ASV_2389	0	0	0	0	0	0	0	0	0	0	0	1	2	1	2	1	0	0	1	0	0
ASV_2390	0	0	0	0	0	0	0	2	0	1	0	2	1	0	1	0	0	0	1	0	0
ASV_2393	0	0	0	0	0	0	0	0	1	0	0	0	0	2	2	0	0	1	1	0	1
ASV_2394	0	0	0	0	0	0	0	0	0	0	0	1	0	1	0	0	1	1	1	2	1
ASV_2397	0	0	0	0	0	0	0	0	0	1	2	0	0	0	0	0	0	3	0	2	0
ASV_2399	1	2	2	3	0	0	0	1	0	0	0	0	0	0	0	0	0	0	0	0	0
ASV_2401	0	0	1	2	0	3	1	1	1	0	0	0	0	0	0	0	0	0	0	0	0
ASV_2403	0	0	0	0	0	0	0	4	0	2	1	1	0	1	0	0	0	0	0	0	0
ASV_2406	0	0	0	0	0	0	0	1	0	0	1	2	0	0	0	0	1	3	0	1	0
ASV_2410	0	0	0	0	0	0	0	0	0	1	2	0	0	0	0	1	2	2	0	0	1
ASV_2413	0	0	0	0	0	0	0	0	2	0	1	4	0	1	0	0	1	0	0	0	0
ASV_2414	0	0	0	0	0	0	0	0	0	0	1	0	1	0	0	3	1	0	1	0	2
ASV_2418	0	0	0	0	0	0	0	0	0	0	0	0	4	0	0	0	1	0	0	3	1
ASV_2419	0	0	0	0	0	0	0	0	0	0	0	0	1	0	0	1	1	1	4	1	0
ASV_2420	0	0	0	0	0	0	0	0	0	0	0	1	2	0	1	0	0	2	0	2	1
ASV_2428	0	0	0	0	0	0	0	0	0	0	0	0	0	0	0	0	0	9	0	0	0
ASV_2429	0	0	0	0	0	0	0	0	1	0	0	0	0	2	3	0	1	1	0	0	1
ASV_2430	0	0	0	0	0	0	0	0	0	0	0	0	0	0	1	0	3	2	0	0	3
ASV_2434	0	0	0	0	0	1	3	0	4	0	0	0	0	0	0	0	1	0	0	0	0
ASV_2435	0	0	0	0	0	0	0	0	0	0	0	0	0	5	4	0	0	0	0	0	0
ASV_2442	0	0	0	0	0	0	0	0	0	0	0	0	0	0	0	0	0	0	0	9	0
ASV_2445	0	0	0	0	0	0	0	0	0	0	0	0	0	0	2	0	2	0	0	5	0
ASV_2447	0	0	0	1	0	5	0	1	0	0	0	0	0	0	0	0	0	0	0	0	0
ASV_2448	0	0	0	0	0	0	0	1	1	0	0	0	3	2	0	0	0	0	0	0	0
ASV_2449	0	0	0	0	0	0	0	0	0	1	0	0	0	0	2	0	0	3	1	0	0
ASV_2451	0	0	0	0	0	0	0	0	0	2	0	0	1	0	0	0	0	1	3	0	0
ASV_2454	0	0	0	0	0	0	0	0	0	0	0	0	0	0	0	0	0	4	1	0	2
ASV_2458	2	0	0	0	1	0	0	0	1	0	0	1	1	1	0	0	0	1	0	0	0
ASV_2459	8	0	0	0	0	0	0	0	0	0	0	0	0	0	0	0	0	0	0	0	0
ASV_2466	0	0	0	2	0	0	1	1	1	0	0	0	1	2	0	0	0	0	0	0	0
ASV_2467	0	0	0	0	0	0	1	2	1	0	0	3	0	1	0	0	0	0	0	0	0
ASV_2471	0	0	0	0	0	0	0	0	0	2	1	0	1	2	2	0	0	0	0	0	0
ASV_2472	0	0	0	0	0	0	0	0	0	1	1	5	0	1	0	0	0	0	0	0	0
ASV_2473	0	0	0	0	0	0	0	0	0	0	7	0	0	0	0	0	0	0	0	0	1
ASV_2475	0	0	0	0	0	0	0	0	2	0	1	1	0	2	2	0	0	0	0	0	0
ASV_2476	0	0	0	0	0	0	0	0	0	0	2	2	0	3	0	0	0	0	0	0	1
ASV_2477	0	0	0	0	0	0	0	0	0	0	1	0	1	1	0	0	0	1	0	0	4
ASV_2481	0	0	0	0	0	0	0	0	0	0	0	3	3	0	0	1	0	1	0	0	0
ASV_2482	0	0	0	0	0	0	0	0	0	0	0	0	3	1	2	0	0	0	0	2	0
ASV_2487	0	0	0	0	0	0	0	0	0	0	0	0	1	0	2	0	1	3	0	0	1
ASV_2492	0	0	0	0	2	0	1	0	0	0	0	1	0	0	0	0	0	1	0	0	3
ASV_2493	0	0	0	0	0	0	0	0	0	0	0	0	0	0	0	0	0	2	5	0	1
ASV_2496	0	0	0	0	0	0	0	0	0	0	0	1	0	0	0	0	0	5	2	0	0
ASV_2498	0	0	0	0	0	0	0	0	0	0	0	2	0	0	0	1	2	3	0	0	0
ASV_2499	0	0	0	0	0	0	0	0	1	0	0	0	0	1	0	1	0	2	2	0	1
ASV_2500	0	0	0	0	0	0	3	0	0	0	0	0	0	1	4	0	0	0	0	0	0
ASV_2507	0	0	0	0	0	0	0	0	0	0	0	0	0	0	0	0	0	0	0	8	0
ASV_2508	0	0	0	0	0	0	0	0	0	0	0	0	0	0	0	0	3	0	0	2	3
ASV_2509	0	0	0	0	0	0	0	0	0	0	0	0	0	0	0	0	6	0	0	2	0
ASV_2510	0	0	0	0	0	0	0	0	0	0	0	0	0	0	5	1	0	0	0	2	0
ASV_2513	0	0	0	0	0	0	0	0	0	0	0	0	0	0	0	0	1	0	0	0	7
ASV_2515	2	0	0	0	1	1	0	0	0	0	0	0	0	0	0	0	0	0	0	0	0
ASV_2517	0	0	1	0	0	0	0	0	0	0	0	0	0	0	0	0	0	0	0	5	0
ASV_2518	0	4	0	0	0	0	0	0	0	0	0	0	0	0	1	0	1	0	0	0	0
ASV_2520	0	0	0	0	0	0	0	0	0	0	0	0	0	0	0	0	0	0	0	6	0
ASV_2521	0	0	0	0	0	0	0	0	0	0	0	0	0	0	0	0	0	0	0	6	0
ASV_2526	7	0	0	0	0	0	0	0	0	0	0	0	0	0	0	0	0	0	0	0	0
ASV_2530	0	0	0	0	0	0	1	4	2	0	0	0	0	0	0	0	0	0	0	0	0
ASV_2540	0	0	0	0	0	0	0	0	0	0	1	0	0	0	3	1	0	1	0	1	0
ASV_2544	0	0	0	0	0	0	0	0	0	0	0	0	1	2	1	1	0	1	0	0	1
ASV_2545	0	0	0	0	0	0	0	0	0	0	0	0	1	0	0	0	4	0	1	1	0
ASV_2546	0	0	0	2	0	0	1	0	0	0	0	1	2	0	0	0	0	0	0	1	0
ASV_2550	0	0	0	0	0	0	0	0	0	0	0	0	4	0	0	0	0	0	0	3	0
ASV_2556	0	0	0	0	0	0	0	0	1	0	0	0	0	1	0	0	0	5	0	0	0
ASV_2558	0	0	0	0	0	0	0	0	0	0	0	0	0	0	0	0	5	1	0	1	0
ASV_2560	0	0	0	0	0	0	0	0	0	0	0	2	0	0	0	0	0	3	2	0	0
ASV_2562	0	0	0	0	0	0	0	0	0	0	0	0	0	0	0	0	1	6	0	0	0
ASV_2563	0	0	0	0	0	0	1	0	0	0	0	0	0	0	0	0	0	2	0	0	4
ASV_2568	0	0	0	0	0	0	0	0	0	0	0	2	0	1	0	0	0	0	1	0	3
ASV_2569	0	0	0	0	0	0	0	0	0	0	0	0	0	1	0	1	0	0	1	3	1
ASV_2570	0	0	0	0	0	0	0	0	0	0	0	1	0	0	0	0	0	0	2	4	0
ASV_2573	0	0	0	0	0	0	0	0	0	0	0	0	0	0	0	0	0	0	1	6	0
ASV_2576	0	0	0	0	0	0	0	0	0	0	0	0	0	0	1	0	4	0	0	1	1
ASV_2581	0	0	0	0	1	4	0	0	0	0	0	0	0	0	0	0	0	0	0	0	0
ASV_2582	0	0	0	0	0	0	0	0	0	0	4	0	0	0	1	0	0	0	0	0	0
ASV_2583	0	0	0	0	0	0	0	0	3	1	0	0	0	0	0	0	0	0	0	0	0
ASV_2585	0	0	0	0	0	0	1	0	0	1	0	0	0	1	0	0	0	0	0	0	0
ASV_2586	0	0	0	0	0	0	1	0	0	0	0	0	1	0	1	0	0	0	0	2	0
ASV_2591	2	0	0	0	0	0	0	0	0	0	2	0	0	0	0	0	2	0	0	0	0
ASV_2597	1	0	0	0	0	0	0	0	0	0	0	0	0	4	0	0	0	0	1	0	0
ASV_2607	0	0	0	0	0	0	0	0	0	1	5	0	0	0	0	0	0	0	0	0	0
ASV_2608	0	0	0	0	0	0	1	0	0	4	0	0	0	0	0	0	0	0	1	0	0
ASV_2609	0	0	0	0	0	0	0	0	0	1	1	1	0	0	1	2	0	0	0	0	0
ASV_2613	0	0	0	0	0	0	0	0	0	0	1	2	0	0	0	0	0	2	0	1	0
ASV_2616	0	0	0	0	0	0	0	0	0	0	2	0	0	0	0	4	0	0	0	0	0
ASV_2617	0	0	0	0	0	0	0	0	0	0	2	0	0	0	0	2	1	0	0	1	0
ASV_2618	0	0	0	0	0	0	0	0	1	0	1	0	0	0	0	0	0	0	4	0	0
ASV_2619	0	0	0	0	0	0	0	0	2	0	0	0	2	1	0	0	0	1	0	0	0
ASV_2622	0	0	0	0	0	0	0	0	0	0	0	0	0	0	0	0	4	1	0	0	1
ASV_2628	0	0	0	0	0	0	0	0	0	0	0	0	0	1	0	0	0	4	0	0	1
ASV_2638	0	0	0	0	0	0	0	0	0	0	0	0	0	0	0	0	0	0	3	0	3
ASV_2641	0	0	0	0	0	0	0	0	0	0	0	0	0	0	0	1	1	0	0	4	0
ASV_2647	0	0	0	0	0	0	0	0	0	0	0	4	0	0	0	0	1	0	0	0	1
ASV_2648	0	0	0	0	0	0	0	0	0	0	0	1	0	0	0	0	5	0	0	0	0
ASV_2649	0	0	0	0	0	0	0	0	0	0	0	0	0	0	6	0	0	0	0	0	0
ASV_2650	0	0	0	0	0	0	0	0	0	0	0	0	0	0	5	1	0	0	0	0	0
ASV_2651	0	4	0	0	0	0	0	0	0	0	0	0	0	0	0	0	0	0	0	0	0
ASV_2652	0	0	0	0	0	0	0	0	0	0	0	0	0	0	0	0	0	0	1	0	0
ASV_2653	0	1	0	0	0	1	0	0	0	0	0	0	0	0	0	0	1	0	0	0	0
ASV_2654	0	0	0	0	0	0	0	0	0	0	0	0	0	0	0	0	0	0	4	0	0
ASV_2655	0	0	0	0	0	0	0	0	0	0	0	0	0	0	0	0	0	0	0	4	0
ASV_2657	0	0	0	0	0	0	0	1	0	1	0	0	1	0	0	0	1	0	0	0	0
ASV_2662	1	0	3	0	0	0	1	0	0	0	0	0	0	0	0	0	0	0	0	0	0
ASV_2668	0	0	0	0	0	0	1	1	0	2	0	0	0	0	0	0	0	0	1	0	0
ASV_2672	0	0	0	0	0	0	0	0	0	1	2	2	0	0	0	0	0	0	0	0	0
ASV_2673	0	0	0	0	0	0	0	0	0	3	0	1	0	0	0	1	0	0	0	0	0
ASV_2676	0	0	0	0	0	0	0	0	0	0	1	0	1	3	0	0	0	0	0	0	0
ASV_2682	0	0	0	0	0	0	0	0	0	0	0	0	1	1	0	2	0	0	0	1	0
ASV_2683	0	0	0	0	0	0	0	0	0	0	0	1	2	0	0	0	2	0	0	0	0
ASV_2684	0	0	0	0	0	0	0	0	0	0	0	0	2	3	0	0	0	0	0	0	0
ASV_2685	0	0	0	0	0	0	0	0	0	0	0	0	3	0	0	0	0	0	0	0	2
ASV_2687	0	0	0	0	0	0	0	0	0	0	0	0	0	0	0	0	0	5	0	0	0
ASV_2688	0	0	0	0	0	0	0	0	0	0	0	0	0	0	0	2	0	3	0	0	0
ASV_2693	0	0	0	0	0	0	3	0	1	0	0	0	0	0	0	0	0	0	0	1	0
ASV_2697	0	0	0	0	0	0	0	0	0	0	0	0	0	0	0	0	0	0	2	2	1
ASV_2698	0	0	0	0	0	0	0	0	0	0	0	0	0	0	0	0	2	0	1	2	0
ASV_2700	0	0	0	0	0	0	0	0	0	0	0	0	0	0	3	0	1	0	0	1	0
ASV_2702	0	0	0	0	0	0	0	0	0	0	0	0	0	0	2	0	0	0	0	3	0
ASV_2704	0	0	0	0	0	0	0	0	0	0	0	1	0	0	3	1	0	0	0	0	0
ASV_2710	0	0	0	0	0	0	0	0	0	0	0	0	0	0	0	0	3	0	0	0	0
ASV_2711	0	0	0	0	0	0	0	0	0	0	0	0	0	0	0	0	0	0	0	3	0
ASV_2712	0	0	0	0	0	0	0	0	0	0	0	0	0	0	0	0	0	1	2	0	0
ASV_2713	0	0	0	0	0	0	0	0	0	0	0	0	0	1	0	0	0	2	0	0	0
ASV_2732	0	0	0	0	0	0	0	3	0	0	0	0	0	0	0	0	0	1	0	0	0
ASV_2737	0	0	0	0	0	0	0	0	0	0	0	0	1	0	0	0	0	0	1	2	0
ASV_2740	0	0	0	0	0	0	0	0	0	0	0	0	4	0	0	0	0	0	0	0	0
ASV_2743	0	0	0	0	0	0	0	0	0	0	0	0	2	0	0	0	2	0	0	0	0
ASV_2751	0	0	0	0	0	0	0	0	0	0	0	1	0	1	1	0	0	1	0	0	0
ASV_2752	0	0	0	0	0	0	0	0	0	0	0	1	0	0	0	1	0	2	0	0	0
ASV_2760	0	0	0	0	0	0	0	0	0	0	0	0	0	0	0	0	0	0	2	0	2
ASV_2765	0	0	0	0	0	0	0	0	0	0	0	0	0	0	0	0	0	0	0	4	0
ASV_2767	0	0	0	0	0	0	0	0	0	0	0	0	0	0	0	0	3	0	0	1	0
ASV_2773	0	0	0	0	0	0	0	0	0	0	0	0	0	0	4	0	0	0	0	0	0
ASV_2774	0	0	0	0	0	0	0	0	0	0	0	0	0	0	1	0	3	0	0	0	0
ASV_2776	0	0	0	0	0	0	0	0	0	0	0	0	0	0	0	0	4	0	0	0	0
ASV_2778	0	0	0	0	0	0	0	0	0	0	0	0	0	0	0	0	0	0	0	0	4
ASV_2799	0	0	0	0	0	0	0	0	0	0	1	0	2	0	0	0	0	0	0	0	0
ASV_2802	0	0	0	0	0	0	0	0	0	0	0	0	1	2	0	0	0	0	0	0	0
ASV_2803	0	0	0	0	0	0	0	0	0	0	0	0	1	1	0	1	0	0	0	0	0
ASV_2804	0	0	0	0	0	0	0	0	0	0	0	0	2	0	0	1	0	0	0	0	0
ASV_2820	0	0	0	0	0	0	0	0	0	0	0	0	0	3	0	0	0	0	0	0	0
ASV_2821	0	0	0	0	0	0	0	0	0	0	0	0	0	0	0	0	0	0	3	0	0
ASV_2825	0	0	0	0	0	0	0	0	0	0	0	0	0	0	0	2	0	0	1	0	0
ASV_2828	0	0	0	0	0	0	0	0	0	0	0	0	0	0	0	0	0	0	0	3	0
ASV_2829	0	0	0	0	0	0	0	0	0	0	0	0	0	0	0	0	0	0	0	3	0
ASV_2834	0	0	0	0	0	0	0	0	0	0	0	0	0	0	0	2	0	0	0	0	1
ASV_2836	0	0	0	0	0	0	0	0	0	0	0	0	0	0	0	0	0	0	0	0	3
ASV_2842	0	0	0	0	0	0	0	0	0	0	0	0	0	0	0	0	0	0	0	0	0
ASV_2859	0	0	0	0	0	0	0	0	0	0	0	0	2	0	0	0	0	0	0	0	0
ASV_2860	0	0	0	0	0	0	0	0	0	0	0	0	2	0	0	0	0	0	0	0	0
ASV_2863	0	0	0	0	0	0	0	0	0	0	0	0	0	0	1	0	0	1	0	0	0
ASV_2879	0	0	0	0	0	0	0	0	0	0	0	0	0	0	0	0	0	0	0	2	0
ASV_2888	0	0	0	0	0	0	0	0	0	0	0	0	0	0	0	2	0	0	0	0	0
ASV_2889	0	0	0	0	0	0	0	0	0	0	0	0	0	0	0	2	0	0	0	0	0

## Sheet: Table S4. Taxonomy
Table S4. Taxonomic information for the samples collected along the geothermal gradient.
	Domain	Phylum	Class	Order	Family	Genus	Species
ASV_2	Archaea	Crenarchaeota	Nitrososphaeria	NA	NA	NA	NA
ASV_3	Archaea	Crenarchaeota	Nitrososphaeria	SCGC AB-179-E04	NA	NA	NA
ASV_4	Bacteria	NA	NA	NA	NA	NA	NA
ASV_5	Bacteria	Verrucomicrobiota	Verrucomicrobiae	Chthoniobacterales	Xiphinematobacteraceae	Candidatus Xiphinematobacter	NA
ASV_7	Bacteria	Acidobacteriota	NA	NA	NA	NA	NA
ASV_8	Bacteria	Verrucomicrobiota	Verrucomicrobiae	Chthoniobacterales	Xiphinematobacteraceae	Candidatus Xiphinematobacter	NA
ASV_9	Bacteria	RCP2-54	NA	NA	NA	NA	NA
ASV_10	Bacteria	Bacteroidota	Bacteroidia	Chitinophagales	Chitinophagaceae	Puia	NA
ASV_11	Bacteria	Acidobacteriota	Acidobacteriae	Subgroup 2	NA	NA	NA
ASV_12	Bacteria	Acidobacteriota	Acidobacteriae	Subgroup 13	NA	NA	NA
ASV_13	Bacteria	Chloroflexi	Ktedonobacteria	Ktedonobacterales	JG30-KF-AS9	NA	NA
ASV_14	Bacteria	Verrucomicrobiota	Verrucomicrobiae	Chthoniobacterales	Xiphinematobacteraceae	Candidatus Xiphinematobacter	NA
ASV_15	Bacteria	Verrucomicrobiota	Verrucomicrobiae	Chthoniobacterales	Xiphinematobacteraceae	Candidatus Xiphinematobacter	NA
ASV_16	Bacteria	Acidobacteriota	Acidobacteriae	Acidobacteriales	NA	NA	NA
ASV_17	Archaea	Thermoplasmatota	Thermoplasmata	Thermoplasmatales	Thermoplasmataceae	A-plasma	NA
ASV_19	Bacteria	Acidobacteriota	Acidobacteriae	Subgroup 2	NA	NA	NA
ASV_21	Bacteria	Acidobacteriota	Acidobacteriae	Subgroup 2	NA	NA	NA
ASV_22	Archaea	Crenarchaeota	Nitrososphaeria	Nitrosotaleales	Nitrosotaleaceae	Candidatus Nitrosotalea	NA
ASV_23	Bacteria	Verrucomicrobiota	Verrucomicrobiae	Chthoniobacterales	Xiphinematobacteraceae	Candidatus Xiphinematobacter	NA
ASV_24	Archaea	Crenarchaeota	Nitrososphaeria	SCGC AB-179-E04	NA	NA	NA
ASV_25	Bacteria	Acidobacteriota	Acidobacteriae	NA	NA	NA	NA
ASV_26	Bacteria	Acidobacteriota	Acidobacteriae	Subgroup 2	NA	NA	NA
ASV_27	Bacteria	Acidobacteriota	Acidobacteriae	Acidobacteriales	NA	NA	NA
ASV_28	Bacteria	Acidobacteriota	NA	NA	NA	NA	NA
ASV_29	Bacteria	NA	NA	NA	NA	NA	NA
ASV_30	Bacteria	Acidobacteriota	Acidobacteriae	Acidobacteriales	Acidobacteriaceae (Subgroup 1)	Terracidiphilus	NA
ASV_33	Bacteria	Armatimonadota	Chthonomonadetes	Chthonomonadales	Chthonomonadaceae	Chthonomonas	NA
ASV_35	Bacteria	Acidobacteriota	NA	NA	NA	NA	NA
ASV_36	Bacteria	Acidobacteriota	Acidobacteriae	Acidobacteriales	Koribacteraceae	Candidatus Koribacter	NA
ASV_37	Bacteria	Proteobacteria	Alphaproteobacteria	Rhizobiales	Xanthobacteraceae	Rhodoplanes	NA
ASV_38	Bacteria	Proteobacteria	Alphaproteobacteria	Rhizobiales	Xanthobacteraceae	NA	NA
ASV_39	Bacteria	Acidobacteriota	Acidobacteriae	Acidobacteriales	Acidobacteriaceae (Subgroup 1)	NA	NA
ASV_40	Bacteria	Proteobacteria	Alphaproteobacteria	Rhizobiales	Xanthobacteraceae	NA	NA
ASV_41	Bacteria	Acidobacteriota	Acidobacteriae	Subgroup 13	NA	NA	NA
ASV_42	Bacteria	NA	NA	NA	NA	NA	NA
ASV_43	Bacteria	Proteobacteria	Gammaproteobacteria	KF-JG30-C25	NA	NA	NA
ASV_44	Bacteria	NA	NA	NA	NA	NA	NA
ASV_45	Bacteria	Verrucomicrobiota	Verrucomicrobiae	Methylacidiphilales	Methylacidiphilaceae	Candidatus Methylacidiphilum	NA
ASV_46	Archaea	Crenarchaeota	Nitrososphaeria	NA	NA	NA	NA
ASV_47	Bacteria	Acidobacteriota	Acidobacteriae	Acidobacteriales	NA	NA	NA
ASV_48	Bacteria	Acidobacteriota	Acidobacteriae	Subgroup 2	NA	NA	NA
ASV_49	Bacteria	Acidobacteriota	Acidobacteriae	Subgroup 2	NA	NA	NA
ASV_50	Bacteria	Verrucomicrobiota	Verrucomicrobiae	Chthoniobacterales	Xiphinematobacteraceae	Candidatus Xiphinematobacter	NA
ASV_51	Bacteria	Bacteroidota	Bacteroidia	Chitinophagales	Chitinophagaceae	Puia	NA
ASV_52	Bacteria	Acidobacteriota	Acidobacteriae	Acidobacteriales	NA	NA	NA
ASV_53	Archaea	Crenarchaeota	Nitrososphaeria	NA	NA	NA	NA
ASV_54	Bacteria	Acidobacteriota	Acidobacteriae	Subgroup 2	NA	NA	NA
ASV_57	Bacteria	Bacteroidota	Bacteroidia	Cytophagales	Microscillaceae	OLB12	NA
ASV_58	Bacteria	Proteobacteria	Alphaproteobacteria	Rhizobiales	Xanthobacteraceae	NA	NA
ASV_59	Bacteria	Chloroflexi	Ktedonobacteria	Ktedonobacterales	Ktedonobacteraceae	NA	NA
ASV_60	Bacteria	RCP2-54	NA	NA	NA	NA	NA
ASV_61	Bacteria	Acidobacteriota	Acidobacteriae	NA	NA	NA	NA
ASV_62	Bacteria	Acidobacteriota	Acidobacteriae	Acidobacteriales	Acidobacteriaceae (Subgroup 1)	Acidipila	NA
ASV_66	Bacteria	Acidobacteriota	Acidobacteriae	Subgroup 2	NA	NA	NA
ASV_67	Bacteria	Acidobacteriota	Acidobacteriae	NA	NA	NA	NA
ASV_68	Archaea	Crenarchaeota	Nitrososphaeria	SCGC AB-179-E04	NA	NA	NA
ASV_69	Bacteria	Acidobacteriota	Acidobacteriae	Acidobacteriales	Koribacteraceae	Candidatus Koribacter	NA
ASV_70	Bacteria	Acidobacteriota	Acidobacteriae	Acidobacteriales	Acidobacteriaceae (Subgroup 1)	Acidipila	NA
ASV_71	Bacteria	Acidobacteriota	Acidobacteriae	Bryobacterales	Bryobacteraceae	Bryobacter	NA
ASV_72	Bacteria	Acidobacteriota	Acidobacteriae	Acidobacteriales	Acidobacteriaceae (Subgroup 1)	NA	NA
ASV_76	Bacteria	Acidobacteriota	Acidobacteriae	Bryobacterales	Bryobacteraceae	Bryobacter	NA
ASV_77	Bacteria	Proteobacteria	Gammaproteobacteria	Gammaproteobacteria Incertae Sedis	Unknown Family_4	Acidibacter	NA
ASV_78	Bacteria	Acidobacteriota	Acidobacteriae	Solibacterales	Solibacteraceae	Candidatus Solibacter	NA
ASV_79	Archaea	Thermoplasmatota	Thermoplasmata	Thermoplasmatales	NA	NA	NA
ASV_80	Bacteria	Acidobacteriota	Acidobacteriae	Subgroup 2	NA	NA	NA
ASV_81	Bacteria	Actinobacteriota	Actinobacteria	Frankiales	Acidothermaceae	Acidothermus	NA
ASV_82	Bacteria	Verrucomicrobiota	Verrucomicrobiae	Chthoniobacterales	Xiphinematobacteraceae	Candidatus Xiphinematobacter	NA
ASV_83	Bacteria	Verrucomicrobiota	Verrucomicrobiae	Chthoniobacterales	Xiphinematobacteraceae	Candidatus Xiphinematobacter	NA
ASV_84	Bacteria	Cyanobacteria	Cyanobacteriia	Chloroplast	NA	NA	NA
ASV_85	Bacteria	Acidobacteriota	Acidobacteriae	NA	NA	NA	NA
ASV_87	Bacteria	Acidobacteriota	Acidobacteriae	Bryobacterales	Bryobacteraceae	Bryobacter	NA
ASV_88	Bacteria	Acidobacteriota	Acidobacteriae	Acidobacteriales	Acidobacteriaceae (Subgroup 1)	Granulicella	NA
ASV_89	Bacteria	Acidobacteriota	NA	NA	NA	NA	NA
ASV_90	Bacteria	Acidobacteriota	Acidobacteriae	Solibacterales	Solibacteraceae	Candidatus Solibacter	NA
ASV_91	Bacteria	Acidobacteriota	Acidobacteriae	Subgroup 2	NA	NA	NA
ASV_94	Bacteria	Acidobacteriota	Acidobacteriae	Acidobacteriales	Koribacteraceae	Candidatus Koribacter	NA
ASV_95	Bacteria	Acidobacteriota	Acidobacteriae	Subgroup 2	NA	NA	NA
ASV_96	Bacteria	Actinobacteriota	Actinobacteria	Corynebacteriales	Mycobacteriaceae	Mycobacterium	NA
ASV_97	Bacteria	Acidobacteriota	Acidobacteriae	Bryobacterales	Bryobacteraceae	Bryobacter	NA
ASV_98	Bacteria	Acidobacteriota	Acidobacteriae	NA	NA	NA	NA
ASV_99	Bacteria	Acidobacteriota	NA	NA	NA	NA	NA
ASV_100	Bacteria	Acidobacteriota	Acidobacteriae	Subgroup 2	NA	NA	NA
ASV_101	Bacteria	Proteobacteria	Gammaproteobacteria	Burkholderiales	Burkholderiaceae	NA	NA
ASV_103	Bacteria	Acidobacteriota	Acidobacteriae	Subgroup 2	NA	NA	NA
ASV_104	Bacteria	Dependentiae	Babeliae	Babeliales	Vermiphilaceae	NA	NA
ASV_105	Bacteria	Chloroflexi	Ktedonobacteria	Ktedonobacterales	Ktedonobacteraceae	1921-2	NA
ASV_106	Bacteria	Bacteroidota	Bacteroidia	Chitinophagales	Chitinophagaceae	Puia	NA
ASV_108	Bacteria	Proteobacteria	Gammaproteobacteria	WD260	NA	NA	NA
ASV_109	Bacteria	Acidobacteriota	Acidobacteriae	NA	NA	NA	NA
ASV_111	Bacteria	Acidobacteriota	Acidobacteriae	Subgroup 2	NA	NA	NA
ASV_112	Bacteria	Acidobacteriota	Acidobacteriae	Solibacterales	Solibacteraceae	Candidatus Solibacter	NA
ASV_114	Bacteria	Acidobacteriota	Acidobacteriae	Acidobacteriales	Acidobacteriaceae (Subgroup 1)	Occallatibacter	NA
ASV_115	Bacteria	NA	NA	NA	NA	NA	NA
ASV_116	Archaea	Crenarchaeota	Nitrososphaeria	Group 1.1c	NA	NA	NA
ASV_117	Bacteria	RCP2-54	NA	NA	NA	NA	NA
ASV_119	Bacteria	Acidobacteriota	Acidobacteriae	NA	NA	NA	NA
ASV_120	Bacteria	Acidobacteriota	Acidobacteriae	Acidobacteriales	Acidobacteriaceae (Subgroup 1)	NA	NA
ASV_121	Bacteria	Verrucomicrobiota	Verrucomicrobiae	Chthoniobacterales	Xiphinematobacteraceae	Candidatus Xiphinematobacter	NA
ASV_122	Bacteria	Acidobacteriota	Acidobacteriae	Solibacterales	Solibacteraceae	Candidatus Solibacter	NA
ASV_123	Bacteria	Acidobacteriota	Acidobacteriae	Subgroup 2	NA	NA	NA
ASV_125	Bacteria	Acidobacteriota	Acidobacteriae	Solibacterales	Solibacteraceae	Candidatus Solibacter	NA
ASV_126	Bacteria	Chloroflexi	Ktedonobacteria	Ktedonobacterales	JG30-KF-AS9	NA	NA
ASV_127	Bacteria	Actinobacteriota	Actinobacteria	Frankiales	Acidothermaceae	Acidothermus	NA
ASV_129	Bacteria	Dependentiae	Babeliae	Babeliales	NA	NA	NA
ASV_130	Bacteria	Actinobacteriota	Actinobacteria	Frankiales	Acidothermaceae	Acidothermus	NA
ASV_131	Bacteria	NA	NA	NA	NA	NA	NA
ASV_133	Bacteria	Acidobacteriota	Acidobacteriae	Subgroup 2	NA	NA	NA
ASV_134	Bacteria	Acidobacteriota	Acidobacteriae	Subgroup 2	NA	NA	NA
ASV_135	Bacteria	Acidobacteriota	Acidobacteriae	Subgroup 2	NA	NA	NA
ASV_136	Bacteria	Acidobacteriota	Acidobacteriae	Solibacterales	Solibacteraceae	Candidatus Solibacter	NA
ASV_137	Bacteria	Actinobacteriota	Actinobacteria	Frankiales	Acidothermaceae	Acidothermus	NA
ASV_138	Bacteria	Acidobacteriota	Acidobacteriae	Bryobacterales	Bryobacteraceae	Bryobacter	NA
ASV_139	Archaea	Crenarchaeota	Nitrososphaeria	Nitrososphaerales	Nitrososphaeraceae	NA	NA
ASV_140	Bacteria	Dependentiae	Babeliae	Babeliales	Vermiphilaceae	NA	NA
ASV_141	Bacteria	NA	NA	NA	NA	NA	NA
ASV_142	Bacteria	Proteobacteria	Gammaproteobacteria	WD260	NA	NA	NA
ASV_143	Archaea	Crenarchaeota	Nitrososphaeria	NA	NA	NA	NA
ASV_144	Bacteria	NA	NA	NA	NA	NA	NA
ASV_145	Bacteria	Acidobacteriota	Acidobacteriae	Subgroup 13	NA	NA	NA
ASV_146	Bacteria	Dadabacteria	Dadabacteriia	Dadabacteriales	NA	NA	NA
ASV_147	Bacteria	Acidobacteriota	Acidobacteriae	NA	NA	NA	NA
ASV_148	Bacteria	Acidobacteriota	Acidobacteriae	Acidobacteriales	NA	NA	NA
ASV_149	Bacteria	Proteobacteria	Alphaproteobacteria	NA	NA	NA	NA
ASV_150	Bacteria	Acidobacteriota	Acidobacteriae	Solibacterales	Solibacteraceae	Candidatus Solibacter	NA
ASV_151	Bacteria	Acidobacteriota	Acidobacteriae	Acidobacteriales	Acidobacteriaceae (Subgroup 1)	Acidipila	NA
ASV_154	Bacteria	Acidobacteriota	Acidobacteriae	Acidobacteriales	Koribacteraceae	Candidatus Koribacter	NA
ASV_155	Bacteria	Acidobacteriota	Acidobacteriae	Acidobacteriales	NA	NA	NA
ASV_157	Bacteria	Cyanobacteria	Cyanobacteriia	Chloroplast	NA	NA	NA
ASV_158	Bacteria	Acidobacteriota	Acidobacteriae	Acidobacteriales	NA	NA	NA
ASV_159	Bacteria	Chloroflexi	Ktedonobacteria	Ktedonobacterales	Ktedonobacteraceae	JG30a-KF-32	NA
ASV_160	Bacteria	Acidobacteriota	Acidobacteriae	Bryobacterales	Bryobacteraceae	Bryobacter	NA
ASV_161	Bacteria	Proteobacteria	Gammaproteobacteria	Burkholderiales	Burkholderiaceae	Burkholderia-Caballeronia-Paraburkholderia	NA
ASV_162	Bacteria	Acidobacteriota	Acidobacteriae	NA	NA	NA	NA
ASV_163	Bacteria	Acidobacteriota	Acidobacteriae	Solibacterales	Solibacteraceae	Candidatus Solibacter	NA
ASV_164	Bacteria	RCP2-54	NA	NA	NA	NA	NA
ASV_165	Bacteria	NA	NA	NA	NA	NA	NA
ASV_168	Bacteria	Proteobacteria	Alphaproteobacteria	Rhizobiales	Xanthobacteraceae	NA	NA
ASV_169	Bacteria	Acidobacteriota	Acidobacteriae	Acidobacteriales	Acidobacteriaceae (Subgroup 1)	NA	NA
ASV_170	Bacteria	Acidobacteriota	Acidobacteriae	Acidobacteriales	Acidobacteriaceae (Subgroup 1)	Granulicella	NA
ASV_171	Bacteria	Acidobacteriota	Acidobacteriae	Acidobacteriales	Acidobacteriaceae (Subgroup 1)	Acidipila	NA
ASV_172	Archaea	Thermoplasmatota	Thermoplasmata	Thermoplasmatales	NA	NA	NA
ASV_173	Bacteria	Acidobacteriota	Acidobacteriae	Acidobacteriales	Koribacteraceae	Candidatus Koribacter	NA
ASV_174	Bacteria	Proteobacteria	Alphaproteobacteria	NA	NA	NA	NA
ASV_175	Bacteria	Actinobacteriota	Actinobacteria	Frankiales	Acidothermaceae	Acidothermus	NA
ASV_176	Bacteria	Acidobacteriota	Acidobacteriae	NA	NA	NA	NA
ASV_177	Bacteria	Verrucomicrobiota	Verrucomicrobiae	Pedosphaerales	Pedosphaeraceae	ADurb.Bin063-1	NA
ASV_178	Bacteria	Acidobacteriota	Acidobacteriae	NA	NA	NA	NA
ASV_179	Bacteria	Bacteroidota	Bacteroidia	Sphingobacteriales	Sphingobacteriaceae	Mucilaginibacter	NA
ASV_180	Bacteria	Acidobacteriota	NA	NA	NA	NA	NA
ASV_182	Bacteria	Acidobacteriota	Acidobacteriae	Subgroup 2	NA	NA	NA
ASV_184	Bacteria	Proteobacteria	Gammaproteobacteria	Gammaproteobacteria Incertae Sedis	Unknown Family_4	Acidibacter	NA
ASV_185	Bacteria	Acidobacteriota	Acidobacteriae	Acidobacteriales	Acidobacteriaceae (Subgroup 1)	NA	NA
ASV_186	Bacteria	Proteobacteria	Alphaproteobacteria	Acetobacterales	Acetobacteraceae	NA	NA
ASV_187	Bacteria	Proteobacteria	Gammaproteobacteria	Gammaproteobacteria Incertae Sedis	Unknown Family_4	Acidibacter	NA
ASV_188	Bacteria	Actinobacteriota	Thermoleophilia	Solirubrobacterales	Solirubrobacteraceae	Conexibacter	NA
ASV_189	Bacteria	Acidobacteriota	Acidobacteriae	Bryobacterales	Bryobacteraceae	Bryobacter	NA
ASV_190	Bacteria	RCP2-54	NA	NA	NA	NA	NA
ASV_191	Bacteria	Acidobacteriota	Acidobacteriae	Solibacterales	Solibacteraceae	Candidatus Solibacter	NA
ASV_192	Bacteria	NA	NA	NA	NA	NA	NA
ASV_193	Bacteria	Acidobacteriota	Acidobacteriae	NA	NA	NA	NA
ASV_195	Bacteria	Proteobacteria	Gammaproteobacteria	Gammaproteobacteria Incertae Sedis	Unknown Family_4	Candidatus Ovatusbacter	NA
ASV_196	Bacteria	Acidobacteriota	Acidobacteriae	Acidobacteriales	Koribacteraceae	Candidatus Koribacter	NA
ASV_199	Bacteria	Chloroflexi	Ktedonobacteria	Ktedonobacterales	Ktedonobacteraceae	1921-2	NA
ASV_200	Bacteria	Acidobacteriota	Acidobacteriae	Subgroup 2	NA	NA	NA
ASV_201	Bacteria	Acidobacteriota	Acidobacteriae	Acidobacteriales	NA	NA	NA
ASV_202	Bacteria	Bacteroidota	Bacteroidia	Chitinophagales	Chitinophagaceae	Puia	NA
ASV_203	Bacteria	Acidobacteriota	Acidobacteriae	Bryobacterales	Bryobacteraceae	Bryobacter	NA
ASV_204	Bacteria	Acidobacteriota	Acidobacteriae	Acidobacteriales	Acidobacteriaceae (Subgroup 1)	NA	NA
ASV_205	Bacteria	NA	NA	NA	NA	NA	NA
ASV_206	Bacteria	Chloroflexi	Ktedonobacteria	Ktedonobacterales	Ktedonobacteraceae	NA	NA
ASV_207	Bacteria	Acidobacteriota	Acidobacteriae	Acidobacteriales	Koribacteraceae	Candidatus Koribacter	NA
ASV_208	Bacteria	Acidobacteriota	Acidobacteriae	Solibacterales	Solibacteraceae	Candidatus Solibacter	NA
ASV_209	Bacteria	Acidobacteriota	Acidobacteriae	Acidobacteriales	Acidobacteriaceae (Subgroup 1)	NA	NA
ASV_210	Bacteria	Verrucomicrobiota	Verrucomicrobiae	Chthoniobacterales	Xiphinematobacteraceae	Candidatus Xiphinematobacter	NA
ASV_211	Bacteria	Bacteroidota	Bacteroidia	Chitinophagales	Chitinophagaceae	Puia	NA
ASV_212	Bacteria	Acidobacteriota	Acidobacteriae	Acidobacteriales	Acidobacteriaceae (Subgroup 1)	NA	NA
ASV_213	Bacteria	Acidobacteriota	Acidobacteriae	Acidobacteriales	Acidobacteriaceae (Subgroup 1)	Acidipila	NA
ASV_214	Bacteria	Acidobacteriota	Acidobacteriae	Acidobacteriales	Acidobacteriaceae (Subgroup 1)	NA	NA
ASV_215	Bacteria	Armatimonadota	Chthonomonadetes	Chthonomonadales	Chthonomonadaceae	Chthonomonas	NA
ASV_216	Bacteria	Acidobacteriota	Acidobacteriae	Acidobacteriales	Acidobacteriaceae (Subgroup 1)	NA	NA
ASV_217	Bacteria	Bacteroidota	Bacteroidia	Sphingobacteriales	Sphingobacteriaceae	Mucilaginibacter	NA
ASV_219	Bacteria	RCP2-54	NA	NA	NA	NA	NA
ASV_220	Bacteria	Acidobacteriota	Acidobacteriae	Acidobacteriales	Koribacteraceae	Candidatus Koribacter	NA
ASV_221	Bacteria	Acidobacteriota	Acidobacteriae	Bryobacterales	Bryobacteraceae	Bryobacter	NA
ASV_222	Bacteria	Verrucomicrobiota	Verrucomicrobiae	Pedosphaerales	Pedosphaeraceae	Pedosphaera	NA
ASV_224	Bacteria	Proteobacteria	Alphaproteobacteria	NA	NA	NA	NA
ASV_225	Bacteria	Acidobacteriota	Acidobacteriae	Acidobacteriales	Acidobacteriaceae (Subgroup 1)	Occallatibacter	NA
ASV_226	Bacteria	Acidobacteriota	Acidobacteriae	Solibacterales	Solibacteraceae	Candidatus Solibacter	NA
ASV_227	Bacteria	Acidobacteriota	Acidobacteriae	NA	NA	NA	NA
ASV_228	Bacteria	Bacteroidota	Bacteroidia	Chitinophagales	Chitinophagaceae	NA	NA
ASV_230	Bacteria	Acidobacteriota	Acidobacteriae	Subgroup 2	NA	NA	NA
ASV_231	Bacteria	RCP2-54	NA	NA	NA	NA	NA
ASV_232	Bacteria	Verrucomicrobiota	Verrucomicrobiae	Chthoniobacterales	Xiphinematobacteraceae	Candidatus Xiphinematobacter	NA
ASV_233	Bacteria	Verrucomicrobiota	Verrucomicrobiae	Chthoniobacterales	Xiphinematobacteraceae	Candidatus Xiphinematobacter	NA
ASV_234	Bacteria	Proteobacteria	Gammaproteobacteria	Gammaproteobacteria Incertae Sedis	Unknown Family_4	Acidibacter	NA
ASV_236	Bacteria	Acidobacteriota	Acidobacteriae	Acidobacteriales	NA	NA	NA
ASV_237	Bacteria	NA	NA	NA	NA	NA	NA
ASV_238	Bacteria	Acidobacteriota	Acidobacteriae	Acidobacteriales	Acidobacteriaceae (Subgroup 1)	NA	NA
ASV_239	Bacteria	Bacteroidota	Bacteroidia	Chitinophagales	Chitinophagaceae	Puia	NA
ASV_240	Bacteria	Acidobacteriota	Acidobacteriae	Bryobacterales	Bryobacteraceae	Bryobacter	NA
ASV_242	Bacteria	WPS-2	NA	NA	NA	NA	NA
ASV_243	Bacteria	Acidobacteriota	Acidobacteriae	Solibacterales	Solibacteraceae	Candidatus Solibacter	NA
ASV_244	Bacteria	Chloroflexi	Ktedonobacteria	Ktedonobacterales	Ktedonobacteraceae	1921-2	NA
ASV_245	Bacteria	Proteobacteria	Gammaproteobacteria	WD260	NA	NA	NA
ASV_246	Bacteria	Chloroflexi	Ktedonobacteria	Ktedonobacterales	Ktedonobacteraceae	HSB OF53-F07	NA
ASV_247	Bacteria	Dependentiae	Babeliae	Babeliales	Vermiphilaceae	NA	NA
ASV_248	Bacteria	Actinobacteriota	Actinobacteria	Frankiales	Acidothermaceae	Acidothermus	NA
ASV_250	Archaea	Crenarchaeota	Nitrososphaeria	NA	NA	NA	NA
ASV_254	Bacteria	Acidobacteriota	Acidobacteriae	NA	NA	NA	NA
ASV_255	Bacteria	Myxococcota	Polyangia	Polyangiales	Polyangiaceae	Pajaroellobacter	NA
ASV_257	Bacteria	Acidobacteriota	Subgroup 5	NA	NA	NA	NA
ASV_258	Bacteria	Acidobacteriota	Acidobacteriae	Bryobacterales	Bryobacteraceae	Bryobacter	NA
ASV_259	Bacteria	Bacteroidota	Bacteroidia	Chitinophagales	Chitinophagaceae	Puia	NA
ASV_262	Bacteria	Acidobacteriota	Acidobacteriae	Acidobacteriales	Acidobacteriaceae (Subgroup 1)	Acidipila	NA
ASV_264	Bacteria	NA	NA	NA	NA	NA	NA
ASV_265	Bacteria	Acidobacteriota	Acidobacteriae	Acidobacteriales	Acidobacteriaceae (Subgroup 1)	Acidipila	NA
ASV_266	Bacteria	Acidobacteriota	Acidobacteriae	Acidobacteriales	Koribacteraceae	Candidatus Koribacter	NA
ASV_267	Bacteria	Acidobacteriota	Acidobacteriae	Acidobacteriales	NA	NA	NA
ASV_268	Bacteria	Bacteroidota	Bacteroidia	Chitinophagales	Chitinophagaceae	Puia	NA
ASV_269	Archaea	Crenarchaeota	Nitrososphaeria	NA	NA	NA	NA
ASV_270	Bacteria	Proteobacteria	Gammaproteobacteria	Gammaproteobacteria Incertae Sedis	Unknown Family_4	Acidibacter	NA
ASV_271	Bacteria	Acidobacteriota	Acidobacteriae	Solibacterales	Solibacteraceae	Candidatus Solibacter	NA
ASV_272	Bacteria	Dependentiae	Babeliae	Babeliales	Vermiphilaceae	NA	NA
ASV_273	Bacteria	Acidobacteriota	Acidobacteriae	Subgroup 2	NA	NA	NA
ASV_274	Bacteria	Acidobacteriota	NA	NA	NA	NA	NA
ASV_275	Bacteria	Verrucomicrobiota	Verrucomicrobiae	Pedosphaerales	Pedosphaeraceae	ADurb.Bin063-1	NA
ASV_276	Bacteria	Bacteroidota	Bacteroidia	Sphingobacteriales	CWT CU03-E12	NA	NA
ASV_277	Bacteria	NA	NA	NA	NA	NA	NA
ASV_278	Bacteria	Acidobacteriota	Acidobacteriae	Subgroup 2	NA	NA	NA
ASV_280	Bacteria	Acidobacteriota	Acidobacteriae	Acidobacteriales	Acidobacteriaceae (Subgroup 1)	NA	NA
ASV_281	Bacteria	Bacteroidota	Bacteroidia	Chitinophagales	Chitinophagaceae	Puia	NA
ASV_283	Bacteria	NA	NA	NA	NA	NA	NA
ASV_284	Bacteria	Proteobacteria	Alphaproteobacteria	Rhizobiales	Xanthobacteraceae	NA	NA
ASV_285	Archaea	Thermoplasmatota	Thermoplasmata	Thermoplasmatales	Thermoplasmataceae	A-plasma	NA
ASV_286	Bacteria	NA	NA	NA	NA	NA	NA
ASV_287	Bacteria	NA	NA	NA	NA	NA	NA
ASV_288	Bacteria	Verrucomicrobiota	Verrucomicrobiae	NA	NA	NA	NA
ASV_289	Bacteria	Actinobacteriota	Actinobacteria	Corynebacteriales	Mycobacteriaceae	Mycobacterium	NA
ASV_290	Bacteria	Acidobacteriota	Acidobacteriae	Acidobacteriales	NA	NA	NA
ASV_291	Bacteria	Planctomycetota	Phycisphaerae	Tepidisphaerales	WD2101 soil group	NA	NA
ASV_293	Bacteria	Verrucomicrobiota	Verrucomicrobiae	Pedosphaerales	Pedosphaeraceae	Ellin516	NA
ASV_294	Bacteria	Acidobacteriota	Acidobacteriae	Subgroup 2	NA	NA	NA
ASV_295	Bacteria	Bacteroidota	Bacteroidia	Chitinophagales	Chitinophagaceae	Thermoflavifilum	NA
ASV_296	Bacteria	Proteobacteria	Alphaproteobacteria	Rickettsiales	Mitochondria	NA	NA
ASV_297	Bacteria	Proteobacteria	Gammaproteobacteria	Xanthomonadales	Rhodanobacteraceae	Rhodanobacter	NA
ASV_298	Bacteria	Proteobacteria	Gammaproteobacteria	Gammaproteobacteria Incertae Sedis	Unknown Family_4	Acidibacter	NA
ASV_299	Bacteria	Chloroflexi	Ktedonobacteria	Ktedonobacterales	JG30-KF-AS9	NA	NA
ASV_301	Bacteria	Acidobacteriota	Acidobacteriae	Subgroup 2	NA	NA	NA
ASV_302	Bacteria	Chloroflexi	AD3	NA	NA	NA	NA
ASV_303	Bacteria	Acidobacteriota	Acidobacteriae	Acidobacteriales	Acidobacteriaceae (Subgroup 1)	Edaphobacter	NA
ASV_305	Bacteria	Acidobacteriota	Acidobacteriae	Acidobacteriales	NA	NA	NA
ASV_306	Bacteria	Verrucomicrobiota	Verrucomicrobiae	Pedosphaerales	Pedosphaeraceae	NA	NA
ASV_307	Bacteria	Acidobacteriota	Acidobacteriae	Bryobacterales	Bryobacteraceae	Bryobacter	NA
ASV_308	Bacteria	Cyanobacteria	Cyanobacteriia	Chloroplast	NA	NA	NA
ASV_309	Bacteria	Chloroflexi	Ktedonobacteria	Ktedonobacterales	JG30-KF-AS9	NA	NA
ASV_310	Bacteria	Actinobacteriota	Actinobacteria	NA	NA	NA	NA
ASV_311	Bacteria	Proteobacteria	Gammaproteobacteria	Burkholderiales	NA	NA	NA
ASV_312	Bacteria	Actinobacteriota	Actinobacteria	Frankiales	Acidothermaceae	Acidothermus	NA
ASV_313	Bacteria	Proteobacteria	Gammaproteobacteria	Enterobacterales	Enterobacteriaceae	NA	NA
ASV_314	Bacteria	Myxococcota	Polyangia	Polyangiales	Polyangiaceae	Pajaroellobacter	NA
ASV_315	Bacteria	Acidobacteriota	Acidobacteriae	Acidobacteriales	Acidobacteriaceae (Subgroup 1)	Terracidiphilus	NA
ASV_316	Bacteria	Proteobacteria	Alphaproteobacteria	Rhizobiales	Xanthobacteraceae	NA	NA
ASV_318	Bacteria	Actinobacteriota	Thermoleophilia	Solirubrobacterales	Solirubrobacteraceae	Conexibacter	NA
ASV_319	Bacteria	Acidobacteriota	Acidobacteriae	Acidobacteriales	Acidobacteriaceae (Subgroup 1)	NA	NA
ASV_321	Bacteria	RCP2-54	NA	NA	NA	NA	NA
ASV_322	Bacteria	Acidobacteriota	Acidobacteriae	Subgroup 13	NA	NA	NA
ASV_323	Bacteria	Acidobacteriota	Acidobacteriae	Acidobacteriales	NA	NA	NA
ASV_324	Bacteria	Acidobacteriota	Acidobacteriae	Solibacterales	Solibacteraceae	Candidatus Solibacter	NA
ASV_325	Bacteria	Acidobacteriota	Acidobacteriae	Subgroup 2	NA	NA	NA
ASV_326	Bacteria	Acidobacteriota	Acidobacteriae	Bryobacterales	Bryobacteraceae	Bryobacter	NA
ASV_327	Bacteria	Acidobacteriota	Acidobacteriae	Subgroup 2	NA	NA	NA
ASV_328	Bacteria	Proteobacteria	Alphaproteobacteria	Rhizobiales	Xanthobacteraceae	NA	NA
ASV_329	Bacteria	Actinobacteriota	Actinobacteria	Frankiales	Acidothermaceae	Acidothermus	NA
ASV_330	Bacteria	Verrucomicrobiota	Verrucomicrobiae	Chthoniobacterales	Xiphinematobacteraceae	Candidatus Xiphinematobacter	NA
ASV_331	Bacteria	Acidobacteriota	Acidobacteriae	NA	NA	NA	NA
ASV_332	Bacteria	Bacteroidota	Bacteroidia	Chitinophagales	Chitinophagaceae	Puia	NA
ASV_334	Bacteria	Proteobacteria	Alphaproteobacteria	Rhizobiales	Xanthobacteraceae	NA	NA
ASV_335	Bacteria	Proteobacteria	Alphaproteobacteria	Rhizobiales	Xanthobacteraceae	Rhodoplanes	NA
ASV_336	Bacteria	NA	NA	NA	NA	NA	NA
ASV_337	Bacteria	Elusimicrobiota	Lineage IIa	NA	NA	NA	NA
ASV_340	Bacteria	NA	NA	NA	NA	NA	NA
ASV_341	Bacteria	Proteobacteria	Gammaproteobacteria	Burkholderiales	Burkholderiaceae	Burkholderia-Caballeronia-Paraburkholderia	NA
ASV_342	Bacteria	Bacteroidota	Bacteroidia	Chitinophagales	Chitinophagaceae	Puia	NA
ASV_344	Bacteria	Acidobacteriota	Acidobacteriae	Solibacterales	Solibacteraceae	Candidatus Solibacter	NA
ASV_345	Bacteria	NA	NA	NA	NA	NA	NA
ASV_346	Bacteria	Actinobacteriota	Actinobacteria	Frankiales	Acidothermaceae	Acidothermus	NA
ASV_347	Bacteria	Verrucomicrobiota	Chlamydiae	Chlamydiales	NA	NA	NA
ASV_348	Bacteria	FCPU426	NA	NA	NA	NA	NA
ASV_349	Bacteria	Chloroflexi	Ktedonobacteria	Ktedonobacterales	Ktedonobacteraceae	NA	NA
ASV_351	Bacteria	RCP2-54	NA	NA	NA	NA	NA
ASV_352	Bacteria	Bacteroidota	Bacteroidia	Chitinophagales	Chitinophagaceae	Puia	NA
ASV_353	Bacteria	Acidobacteriota	Acidobacteriae	Acidobacteriales	Koribacteraceae	Candidatus Koribacter	NA
ASV_354	Bacteria	Acidobacteriota	Acidobacteriae	NA	NA	NA	NA
ASV_355	Bacteria	GAL15	NA	NA	NA	NA	NA
ASV_357	Bacteria	NA	NA	NA	NA	NA	NA
ASV_358	Bacteria	NA	NA	NA	NA	NA	NA
ASV_359	Bacteria	NA	NA	NA	NA	NA	NA
ASV_361	Bacteria	NA	NA	NA	NA	NA	NA
ASV_363	Bacteria	Acidobacteriota	Acidobacteriae	Solibacterales	Solibacteraceae	Candidatus Solibacter	NA
ASV_364	Bacteria	Myxococcota	Polyangia	Polyangiales	Polyangiaceae	Pajaroellobacter	NA
ASV_366	Bacteria	Acidobacteriota	Acidobacteriae	Acidobacteriales	Acidobacteriaceae (Subgroup 1)	Acidipila	NA
ASV_367	Bacteria	Proteobacteria	Gammaproteobacteria	Burkholderiales	Burkholderiaceae	Burkholderia-Caballeronia-Paraburkholderia	NA
ASV_370	Bacteria	Acidobacteriota	Acidobacteriae	Acidobacteriales	Acidobacteriaceae (Subgroup 1)	NA	NA
ASV_371	Bacteria	WPS-2	NA	NA	NA	NA	NA
ASV_372	Bacteria	Cyanobacteria	Vampirivibrionia	Obscuribacterales	Obscuribacteraceae	Candidatus Obscuribacter	NA
ASV_373	Bacteria	Chloroflexi	Ktedonobacteria	Ktedonobacterales	Ktedonobacteraceae	FCPS473	NA
ASV_374	Bacteria	NA	NA	NA	NA	NA	NA
ASV_375	Bacteria	Acidobacteriota	Acidobacteriae	Acidobacteriales	Acidobacteriaceae (Subgroup 1)	Edaphobacter	NA
ASV_377	Bacteria	Acidobacteriota	Acidobacteriae	Solibacterales	Solibacteraceae	Candidatus Solibacter	NA
ASV_378	Bacteria	Actinobacteriota	Thermoleophilia	Solirubrobacterales	Solirubrobacteraceae	Conexibacter	NA
ASV_381	Bacteria	Acidobacteriota	Acidobacteriae	Bryobacterales	Bryobacteraceae	Bryobacter	NA
ASV_382	Bacteria	Proteobacteria	Gammaproteobacteria	KF-JG30-C25	NA	NA	NA
ASV_383	Archaea	Thermoplasmatota	Thermoplasmata	Thermoplasmatales	Thermoplasmataceae	A-plasma	NA
ASV_384	Bacteria	Planctomycetota	Planctomycetes	Gemmatales	Gemmataceae	NA	NA
ASV_386	Bacteria	Acidobacteriota	Acidobacteriae	Bryobacterales	Bryobacteraceae	Bryobacter	NA
ASV_387	Bacteria	Proteobacteria	Gammaproteobacteria	Gammaproteobacteria Incertae Sedis	Unknown Family_4	Acidibacter	NA
ASV_388	Bacteria	Proteobacteria	Gammaproteobacteria	Gammaproteobacteria Incertae Sedis	Unknown Family_4	Acidibacter	NA
ASV_389	Bacteria	Myxococcota	Polyangia	Haliangiales	Haliangiaceae	Haliangium	NA
ASV_391	Bacteria	Acidobacteriota	Acidobacteriae	Acidobacteriales	NA	NA	NA
ASV_392	Bacteria	Proteobacteria	Gammaproteobacteria	WD260	NA	NA	NA
ASV_393	Archaea	Thermoplasmatota	Thermoplasmata	NA	NA	NA	NA
ASV_394	Bacteria	Proteobacteria	Alphaproteobacteria	Rhizobiales	Rhodomicrobiaceae	Rhodomicrobium	NA
ASV_395	Bacteria	Actinobacteriota	Actinobacteria	Pseudonocardiales	Pseudonocardiaceae	NA	NA
ASV_398	Bacteria	Proteobacteria	Alphaproteobacteria	Acetobacterales	Acetobacteraceae	NA	NA
ASV_399	Bacteria	Acidobacteriota	Acidobacteriae	Subgroup 2	NA	NA	NA
ASV_400	Bacteria	Acidobacteriota	Acidobacteriae	NA	NA	NA	NA
ASV_401	Bacteria	Actinobacteriota	Actinobacteria	NA	NA	NA	NA
ASV_402	Bacteria	Acidobacteriota	Acidobacteriae	Acidobacteriales	Koribacteraceae	Candidatus Koribacter	NA
ASV_403	Bacteria	Proteobacteria	Gammaproteobacteria	Diplorickettsiales	Diplorickettsiaceae	Aquicella	NA
ASV_404	Bacteria	Actinobacteriota	Actinobacteria	Streptomycetales	Streptomycetaceae	NA	NA
ASV_405	Bacteria	Bacteroidota	Bacteroidia	Chitinophagales	Chitinophagaceae	Puia	NA
ASV_406	Bacteria	Acidobacteriota	Acidobacteriae	NA	NA	NA	NA
ASV_407	Bacteria	Acidobacteriota	Acidobacteriae	Acidobacteriales	Acidobacteriaceae (Subgroup 1)	NA	NA
ASV_408	Bacteria	Proteobacteria	Alphaproteobacteria	Rhizobiales	Xanthobacteraceae	NA	NA
ASV_409	Bacteria	Acidobacteriota	Acidobacteriae	Subgroup 2	NA	NA	NA
ASV_410	Bacteria	NA	NA	NA	NA	NA	NA
ASV_411	Bacteria	NA	NA	NA	NA	NA	NA
ASV_412	Bacteria	Acidobacteriota	Acidobacteriae	Acidobacteriales	NA	NA	NA
ASV_414	Bacteria	NA	NA	NA	NA	NA	NA
ASV_415	Bacteria	Verrucomicrobiota	Verrucomicrobiae	Chthoniobacterales	Chthoniobacteraceae	Candidatus Udaeobacter	NA
ASV_416	Bacteria	Acidobacteriota	Acidobacteriae	Subgroup 2	NA	NA	NA
ASV_418	Bacteria	Acidobacteriota	Acidobacteriae	Subgroup 2	NA	NA	NA
ASV_419	Bacteria	Proteobacteria	Alphaproteobacteria	Rhizobiales	Xanthobacteraceae	NA	NA
ASV_421	Bacteria	Bdellovibrionota	Oligoflexia	0319-6G20	NA	NA	NA
ASV_422	Bacteria	Actinobacteriota	Actinobacteria	NA	NA	NA	NA
ASV_423	Bacteria	Chloroflexi	Ktedonobacteria	Ktedonobacterales	Ktedonobacteraceae	1959-1	NA
ASV_424	Bacteria	Acidobacteriota	Acidobacteriae	Acidobacteriales	Acidobacteriaceae (Subgroup 1)	Occallatibacter	NA
ASV_425	Bacteria	Actinobacteriota	Actinobacteria	Pseudonocardiales	Pseudonocardiaceae	NA	NA
ASV_426	Bacteria	Acidobacteriota	Acidobacteriae	Acidobacteriales	Acidobacteriaceae (Subgroup 1)	Occallatibacter	NA
ASV_427	Bacteria	Planctomycetota	Phycisphaerae	Tepidisphaerales	WD2101 soil group	NA	NA
ASV_428	Bacteria	Acidobacteriota	Acidobacteriae	Bryobacterales	Bryobacteraceae	Bryobacter	NA
ASV_429	Bacteria	Verrucomicrobiota	Verrucomicrobiae	NA	NA	NA	NA
ASV_430	Bacteria	Proteobacteria	Alphaproteobacteria	Rhizobiales	NA	NA	NA
ASV_431	Bacteria	Acidobacteriota	Acidobacteriae	Solibacterales	Solibacteraceae	Candidatus Solibacter	NA
ASV_432	Bacteria	Actinobacteriota	Actinobacteria	Frankiales	Acidothermaceae	Acidothermus	NA
ASV_434	Bacteria	Acidobacteriota	Acidobacteriae	Acidobacteriales	Acidobacteriaceae (Subgroup 1)	Bryocella	NA
ASV_435	Bacteria	Acidobacteriota	Acidobacteriae	Subgroup 2	NA	NA	NA
ASV_437	Bacteria	RCP2-54	NA	NA	NA	NA	NA
ASV_438	Bacteria	Bacteroidota	Bacteroidia	Sphingobacteriales	Sphingobacteriaceae	NA	NA
ASV_439	Bacteria	Acidobacteriota	Acidobacteriae	Subgroup 2	NA	NA	NA
ASV_440	Bacteria	Actinobacteriota	Thermoleophilia	Solirubrobacterales	Solirubrobacteraceae	NA	NA
ASV_441	Bacteria	Acidobacteriota	Acidobacteriae	Acidobacteriales	NA	NA	NA
ASV_442	Bacteria	Actinobacteriota	Actinobacteria	Frankiales	Acidothermaceae	Acidothermus	NA
ASV_443	Bacteria	Actinobacteriota	Actinobacteria	Frankiales	Acidothermaceae	Acidothermus	NA
ASV_444	Bacteria	Proteobacteria	Gammaproteobacteria	Diplorickettsiales	Diplorickettsiaceae	Aquicella	NA
ASV_445	Bacteria	Acidobacteriota	Acidobacteriae	Acidobacteriales	Koribacteraceae	Candidatus Koribacter	NA
ASV_447	Bacteria	Armatimonadota	Chthonomonadetes	Chthonomonadales	Chthonomonadaceae	Chthonomonas	NA
ASV_448	Bacteria	Proteobacteria	Gammaproteobacteria	Gammaproteobacteria Incertae Sedis	Unknown Family_4	Acidibacter	NA
ASV_449	Bacteria	Planctomycetota	Phycisphaerae	Tepidisphaerales	CPla-3 termite group	NA	NA
ASV_451	Archaea	Crenarchaeota	Nitrososphaeria	Group 1.1c	NA	NA	NA
ASV_452	Bacteria	Acidobacteriota	Acidobacteriae	NA	NA	NA	NA
ASV_454	Bacteria	Acidobacteriota	Acidobacteriae	Acidobacteriales	Acidobacteriaceae (Subgroup 1)	Granulicella	NA
ASV_455	Bacteria	Acidobacteriota	Acidobacteriae	Acidobacteriales	Acidobacteriaceae (Subgroup 1)	Occallatibacter	NA
ASV_456	Bacteria	Acidobacteriota	Acidobacteriae	Bryobacterales	Bryobacteraceae	Bryobacter	NA
ASV_457	Bacteria	Chloroflexi	Ktedonobacteria	Ktedonobacterales	Ktedonobacteraceae	FCPS473	NA
ASV_458	Bacteria	Proteobacteria	Gammaproteobacteria	Pseudomonadales	Pseudomonadaceae	Pseudomonas	NA
ASV_459	Bacteria	WPS-2	NA	NA	NA	NA	NA
ASV_460	Bacteria	Acidobacteriota	Thermoanaerobaculia	Thermoanaerobaculales	Thermoanaerobaculaceae	Subgroup 10	NA
ASV_461	Bacteria	Planctomycetota	Planctomycetes	Isosphaerales	Isosphaeraceae	NA	NA
ASV_462	Bacteria	Verrucomicrobiota	Verrucomicrobiae	Pedosphaerales	Pedosphaeraceae	ADurb.Bin063-1	NA
ASV_463	Bacteria	Bacteroidota	Bacteroidia	Chitinophagales	Chitinophagaceae	Edaphobaculum	NA
ASV_464	Bacteria	Acidobacteriota	Acidobacteriae	Acidobacteriales	Acidobacteriaceae (Subgroup 1)	Bryocella	NA
ASV_465	Bacteria	Bdellovibrionota	Oligoflexia	0319-6G20	NA	NA	NA
ASV_466	Bacteria	Acidobacteriota	Acidobacteriae	Subgroup 2	NA	NA	NA
ASV_467	Bacteria	Planctomycetota	Phycisphaerae	Tepidisphaerales	CPla-3 termite group	NA	NA
ASV_468	Bacteria	Acidobacteriota	Acidobacteriae	Acidobacteriales	Acidobacteriaceae (Subgroup 1)	Granulicella	NA
ASV_469	Bacteria	Myxococcota	Polyangia	Polyangiales	Polyangiaceae	Pajaroellobacter	NA
ASV_470	Bacteria	Verrucomicrobiota	Chlamydiae	Chlamydiales	Parachlamydiaceae	NA	NA
ASV_471	Bacteria	Acidobacteriota	Acidobacteriae	Acidobacteriales	Acidobacteriaceae (Subgroup 1)	NA	NA
ASV_472	Bacteria	Chloroflexi	Ktedonobacteria	Ktedonobacterales	Ktedonobacteraceae	HSB OF53-F07	NA
ASV_475	Bacteria	Proteobacteria	Alphaproteobacteria	Rhizobiales	Beijerinckiaceae	NA	NA
ASV_476	Bacteria	Acidobacteriota	Holophagae	Subgroup 7	NA	NA	NA
ASV_477	Bacteria	GAL15	NA	NA	NA	NA	NA
ASV_478	Bacteria	Verrucomicrobiota	Verrucomicrobiae	Pedosphaerales	Pedosphaeraceae	NA	NA
ASV_479	Bacteria	Actinobacteriota	Actinobacteria	Frankiales	Acidothermaceae	Acidothermus	NA
ASV_480	Bacteria	Acidobacteriota	NA	NA	NA	NA	NA
ASV_482	Bacteria	Verrucomicrobiota	Verrucomicrobiae	Pedosphaerales	Pedosphaeraceae	ADurb.Bin063-1	NA
ASV_484	Bacteria	Proteobacteria	Gammaproteobacteria	Burkholderiales	NA	NA	NA
ASV_486	Bacteria	Acidobacteriota	Acidobacteriae	Subgroup 2	NA	NA	NA
ASV_487	Bacteria	Planctomycetota	Phycisphaerae	Tepidisphaerales	WD2101 soil group	NA	NA
ASV_488	Bacteria	Acidobacteriota	Acidobacteriae	Subgroup 2	NA	NA	NA
ASV_491	Bacteria	Acidobacteriota	Acidobacteriae	Subgroup 2	NA	NA	NA
ASV_494	Bacteria	Planctomycetota	Phycisphaerae	Tepidisphaerales	WD2101 soil group	NA	NA
ASV_495	Bacteria	Acidobacteriota	Acidobacteriae	Subgroup 2	NA	NA	NA
ASV_496	Bacteria	Acidobacteriota	Acidobacteriae	Subgroup 2	NA	NA	NA
ASV_497	Bacteria	Planctomycetota	Phycisphaerae	NA	NA	NA	NA
ASV_498	Bacteria	Cyanobacteria	Cyanobacteriia	Cyanobacteriales	Nostocaceae	Stigonema SAG 48.90	NA
ASV_499	Bacteria	NA	NA	NA	NA	NA	NA
ASV_500	Archaea	Crenarchaeota	Nitrososphaeria	NA	NA	NA	NA
ASV_501	Bacteria	Acidobacteriota	Acidobacteriae	Subgroup 2	NA	NA	NA
ASV_502	Bacteria	Myxococcota	Polyangia	Polyangiales	Polyangiaceae	Pajaroellobacter	NA
ASV_503	Bacteria	Bacteroidota	Bacteroidia	Chitinophagales	Chitinophagaceae	Chitinophaga	NA
ASV_504	Bacteria	Acidobacteriota	Acidobacteriae	NA	NA	NA	NA
ASV_506	Bacteria	Chloroflexi	Ktedonobacteria	Ktedonobacterales	Ktedonobacteraceae	FCPS473	NA
ASV_511	Bacteria	Elusimicrobiota	Lineage IIa	NA	NA	NA	NA
ASV_512	Archaea	Crenarchaeota	Nitrososphaeria	SCGC AB-179-E04	NA	NA	NA
ASV_513	Bacteria	Chloroflexi	AD3	NA	NA	NA	NA
ASV_514	Bacteria	NA	NA	NA	NA	NA	NA
ASV_515	Bacteria	Acidobacteriota	Acidobacteriae	Subgroup 2	NA	NA	NA
ASV_516	Bacteria	RCP2-54	NA	NA	NA	NA	NA
ASV_517	Bacteria	Chloroflexi	Ktedonobacteria	Ktedonobacterales	Ktedonobacteraceae	FCPS473	NA
ASV_518	Bacteria	Actinobacteriota	Thermoleophilia	Solirubrobacterales	Solirubrobacteraceae	Conexibacter	NA
ASV_519	Bacteria	NA	NA	NA	NA	NA	NA
ASV_520	Bacteria	Actinobacteriota	Actinobacteria	Pseudonocardiales	Pseudonocardiaceae	NA	NA
ASV_521	Bacteria	RCP2-54	NA	NA	NA	NA	NA
ASV_523	Bacteria	Acidobacteriota	Acidobacteriae	Acidobacteriales	Koribacteraceae	Candidatus Koribacter	NA
ASV_524	Archaea	Crenarchaeota	Nitrososphaeria	NA	NA	NA	NA
ASV_525	Bacteria	Bacteroidota	Bacteroidia	Chitinophagales	Chitinophagaceae	NA	NA
ASV_526	Bacteria	Proteobacteria	Alphaproteobacteria	Rhizobiales	Rhizobiaceae	NA	NA
ASV_527	Bacteria	Actinobacteriota	Actinobacteria	Corynebacteriales	Mycobacteriaceae	Mycobacterium	NA
ASV_529	Bacteria	Actinobacteriota	Actinobacteria	Frankiales	Acidothermaceae	Acidothermus	NA
ASV_531	Bacteria	Proteobacteria	Alphaproteobacteria	Caulobacterales	Caulobacteraceae	NA	NA
ASV_532	Bacteria	Acidobacteriota	Acidobacteriae	Solibacterales	Solibacteraceae	Candidatus Solibacter	NA
ASV_534	Bacteria	Proteobacteria	Alphaproteobacteria	Acetobacterales	Acetobacteraceae	NA	NA
ASV_535	Bacteria	Acidobacteriota	Acidobacteriae	Solibacterales	Solibacteraceae	Candidatus Solibacter	NA
ASV_536	Bacteria	Verrucomicrobiota	Verrucomicrobiae	Chthoniobacterales	Xiphinematobacteraceae	Candidatus Xiphinematobacter	NA
ASV_537	Archaea	Crenarchaeota	Nitrososphaeria	NA	NA	NA	NA
ASV_538	Bacteria	Acidobacteriota	Acidobacteriae	Subgroup 2	NA	NA	NA
ASV_540	Bacteria	Planctomycetota	Planctomycetes	Isosphaerales	Isosphaeraceae	Aquisphaera	NA
ASV_541	Bacteria	Proteobacteria	Gammaproteobacteria	NA	NA	NA	NA
ASV_542	Bacteria	Acidobacteriota	Acidobacteriae	Acidobacteriales	Acidobacteriaceae (Subgroup 1)	NA	NA
ASV_544	Bacteria	Proteobacteria	Alphaproteobacteria	Rhizobiales	Rhodomicrobiaceae	Rhodomicrobium	NA
ASV_545	Bacteria	Bacteroidota	Bacteroidia	Chitinophagales	Chitinophagaceae	Puia	NA
ASV_546	Bacteria	NA	NA	NA	NA	NA	NA
ASV_547	Bacteria	Proteobacteria	Gammaproteobacteria	Burkholderiales	Burkholderiaceae	Burkholderia-Caballeronia-Paraburkholderia	NA
ASV_548	Bacteria	Proteobacteria	Alphaproteobacteria	Rickettsiales	SM2D12	NA	NA
ASV_549	Archaea	Crenarchaeota	Nitrososphaeria	NA	NA	NA	NA
ASV_550	Bacteria	Planctomycetota	Phycisphaerae	Tepidisphaerales	WD2101 soil group	NA	NA
ASV_552	Bacteria	Firmicutes	Bacilli	RsaHf231	NA	NA	NA
ASV_553	Bacteria	Elusimicrobiota	Lineage IIa	NA	NA	NA	NA
ASV_554	Bacteria	Bacteroidota	Bacteroidia	Flavobacteriales	Flavobacteriaceae	NA	NA
ASV_556	Bacteria	Acidobacteriota	Acidobacteriae	Subgroup 2	NA	NA	NA
ASV_558	Bacteria	Acidobacteriota	Acidobacteriae	Acidobacteriales	Koribacteraceae	Candidatus Koribacter	NA
ASV_559	Bacteria	WPS-2	NA	NA	NA	NA	NA
ASV_560	Bacteria	Actinobacteriota	Actinobacteria	Frankiales	Frankiaceae	Jatrophihabitans	NA
ASV_561	Bacteria	Planctomycetota	Planctomycetes	Isosphaerales	Isosphaeraceae	Aquisphaera	NA
ASV_562	Bacteria	Actinobacteriota	Actinobacteria	Corynebacteriales	NA	NA	NA
ASV_563	Bacteria	Acidobacteriota	Acidobacteriae	Acidobacteriales	Acidobacteriaceae (Subgroup 1)	Edaphobacter	NA
ASV_564	Bacteria	Acidobacteriota	Acidobacteriae	Bryobacterales	Bryobacteraceae	Bryobacter	NA
ASV_565	Bacteria	Bacteroidota	Bacteroidia	Sphingobacteriales	Sphingobacteriaceae	NA	NA
ASV_566	Bacteria	Acidobacteriota	Acidobacteriae	Acidobacteriales	Acidobacteriaceae (Subgroup 1)	Edaphobacter	NA
ASV_567	Archaea	Crenarchaeota	Nitrososphaeria	Group 1.1c	NA	NA	NA
ASV_568	Bacteria	WPS-2	NA	NA	NA	NA	NA
ASV_569	Bacteria	NA	NA	NA	NA	NA	NA
ASV_570	Bacteria	Acidobacteriota	Acidobacteriae	Acidobacteriales	Acidobacteriaceae (Subgroup 1)	Acidicapsa	NA
ASV_571	Bacteria	Proteobacteria	Alphaproteobacteria	Reyranellales	Reyranellaceae	Reyranella	NA
ASV_573	Bacteria	NA	NA	NA	NA	NA	NA
ASV_574	Bacteria	Bacteroidota	Bacteroidia	Sphingobacteriales	Sphingobacteriaceae	Mucilaginibacter	NA
ASV_575	Bacteria	Acidobacteriota	Acidobacteriae	Acidobacteriales	Koribacteraceae	Candidatus Koribacter	NA
ASV_576	Bacteria	NA	NA	NA	NA	NA	NA
ASV_577	Bacteria	Chloroflexi	AD3	NA	NA	NA	NA
ASV_578	Bacteria	WPS-2	NA	NA	NA	NA	NA
ASV_579	Bacteria	Proteobacteria	Alphaproteobacteria	Rhizobiales	Beijerinckiaceae	Roseiarcus	NA
ASV_581	Bacteria	Acidobacteriota	Acidobacteriae	Acidobacteriales	Acidobacteriaceae (Subgroup 1)	Occallatibacter	NA
ASV_582	Bacteria	Actinobacteriota	Actinobacteria	Catenulisporales	Actinospicaceae	Actinospica	NA
ASV_583	Bacteria	Proteobacteria	Alphaproteobacteria	Rhizobiales	Rhodomicrobiaceae	Rhodomicrobium	NA
ASV_585	Bacteria	Proteobacteria	Alphaproteobacteria	Rhizobiales	Xanthobacteraceae	NA	NA
ASV_587	Bacteria	Acidobacteriota	Acidobacteriae	Subgroup 2	NA	NA	NA
ASV_588	Bacteria	NA	NA	NA	NA	NA	NA
ASV_590	Bacteria	NA	NA	NA	NA	NA	NA
ASV_591	Bacteria	Acidobacteriota	Acidobacteriae	Acidobacteriales	NA	NA	NA
ASV_593	Bacteria	Verrucomicrobiota	Verrucomicrobiae	Chthoniobacterales	Xiphinematobacteraceae	Candidatus Xiphinematobacter	NA
ASV_594	Bacteria	Planctomycetota	Planctomycetes	NA	NA	NA	NA
ASV_595	Bacteria	Acidobacteriota	Acidobacteriae	Acidobacteriales	NA	NA	NA
ASV_596	Bacteria	Verrucomicrobiota	Verrucomicrobiae	Opitutales	Opitutaceae	Opitutus	NA
ASV_597	Bacteria	NA	NA	NA	NA	NA	NA
ASV_598	Bacteria	RCP2-54	NA	NA	NA	NA	NA
ASV_599	Bacteria	Acidobacteriota	Acidobacteriae	Solibacterales	Solibacteraceae	Candidatus Solibacter	NA
ASV_600	Bacteria	Acidobacteriota	Acidobacteriae	NA	NA	NA	NA
ASV_601	Bacteria	Bacteroidota	Bacteroidia	Chitinophagales	Chitinophagaceae	Puia	NA
ASV_602	Bacteria	Chloroflexi	Ktedonobacteria	Ktedonobacterales	Ktedonobacteraceae	1959-1	NA
ASV_603	Bacteria	Bdellovibrionota	Oligoflexia	0319-6G20	NA	NA	NA
ASV_604	Bacteria	Acidobacteriota	Acidobacteriae	Bryobacterales	Bryobacteraceae	Bryobacter	NA
ASV_605	Bacteria	Acidobacteriota	Acidobacteriae	Acidobacteriales	Acidobacteriaceae (Subgroup 1)	NA	NA
ASV_606	Bacteria	NA	NA	NA	NA	NA	NA
ASV_608	Bacteria	Acidobacteriota	Acidobacteriae	Subgroup 2	NA	NA	NA
ASV_610	Bacteria	Acidobacteriota	Acidobacteriae	Acidobacteriales	Acidobacteriaceae (Subgroup 1)	Occallatibacter	NA
ASV_611	Bacteria	NA	NA	NA	NA	NA	NA
ASV_612	Bacteria	NA	NA	NA	NA	NA	NA
ASV_614	Bacteria	Dependentiae	Babeliae	Babeliales	Vermiphilaceae	NA	NA
ASV_616	Bacteria	Acidobacteriota	Subgroup 5	NA	NA	NA	NA
ASV_618	Bacteria	Acidobacteriota	Acidobacteriae	Acidobacteriales	Acidobacteriaceae (Subgroup 1)	Granulicella	NA
ASV_619	Bacteria	Actinobacteriota	Actinobacteria	NA	NA	NA	NA
ASV_620	Bacteria	NA	NA	NA	NA	NA	NA
ASV_621	Bacteria	Myxococcota	Polyangia	Haliangiales	Haliangiaceae	Haliangium	NA
ASV_622	Bacteria	Acidobacteriota	Acidobacteriae	NA	NA	NA	NA
ASV_624	Bacteria	Chloroflexi	Ktedonobacteria	Ktedonobacterales	JG30-KF-AS9	NA	NA
ASV_625	Bacteria	Bacteroidota	Bacteroidia	Sphingobacteriales	Sphingobacteriaceae	Mucilaginibacter	NA
ASV_626	Bacteria	Acidobacteriota	Acidobacteriae	Subgroup 2	NA	NA	NA
ASV_627	Bacteria	Chloroflexi	Ktedonobacteria	Ktedonobacterales	Ktedonobacteraceae	NA	NA
ASV_628	Bacteria	Acidobacteriota	Acidobacteriae	Solibacterales	Solibacteraceae	Candidatus Solibacter	NA
ASV_629	Bacteria	Myxococcota	Polyangia	Polyangiales	Polyangiaceae	Pajaroellobacter	NA
ASV_630	Bacteria	Acidobacteriota	Acidobacteriae	Acidobacteriales	Koribacteraceae	Candidatus Koribacter	NA
ASV_631	Bacteria	Verrucomicrobiota	Verrucomicrobiae	Pedosphaerales	Pedosphaeraceae	Pedosphaera	NA
ASV_632	Bacteria	Acidobacteriota	Holophagae	Subgroup 7	NA	NA	NA
ASV_633	Bacteria	NA	NA	NA	NA	NA	NA
ASV_634	Bacteria	Proteobacteria	Gammaproteobacteria	Gammaproteobacteria Incertae Sedis	Unknown Family_4	Acidibacter	NA
ASV_636	Bacteria	Chloroflexi	Ktedonobacteria	Ktedonobacterales	Ktedonobacteraceae	Thermosporothrix	NA
ASV_637	Bacteria	Acidobacteriota	Acidobacteriae	Subgroup 2	NA	NA	NA
ASV_638	Bacteria	Actinobacteriota	Actinobacteria	NA	NA	NA	NA
ASV_640	Bacteria	Planctomycetota	Planctomycetes	Gemmatales	Gemmataceae	Gemmata	NA
ASV_641	Bacteria	Planctomycetota	Planctomycetes	Gemmatales	Gemmataceae	Gemmata	NA
ASV_645	Bacteria	Planctomycetota	Planctomycetes	Isosphaerales	Isosphaeraceae	Singulisphaera	NA
ASV_646	Bacteria	Proteobacteria	Alphaproteobacteria	Acetobacterales	Acetobacteraceae	Acidicaldus	NA
ASV_647	Bacteria	Proteobacteria	Alphaproteobacteria	Rhizobiales	Xanthobacteraceae	NA	NA
ASV_648	Bacteria	Chloroflexi	Ktedonobacteria	Ktedonobacterales	Ktedonobacteraceae	FCPS473	NA
ASV_649	Bacteria	Proteobacteria	Alphaproteobacteria	NA	NA	NA	NA
ASV_650	Bacteria	Actinobacteriota	Thermoleophilia	Solirubrobacterales	Solirubrobacteraceae	Conexibacter	NA
ASV_651	Bacteria	Acidobacteriota	Acidobacteriae	NA	NA	NA	NA
ASV_652	Bacteria	NA	NA	NA	NA	NA	NA
ASV_655	Bacteria	Acidobacteriota	Acidobacteriae	Solibacterales	Solibacteraceae	Candidatus Solibacter	NA
ASV_656	Bacteria	RCP2-54	NA	NA	NA	NA	NA
ASV_658	Bacteria	Bacteroidota	Bacteroidia	Sphingobacteriales	Sphingobacteriaceae	Mucilaginibacter	NA
ASV_659	Bacteria	Chloroflexi	Ktedonobacteria	Ktedonobacterales	JG30-KF-AS9	NA	NA
ASV_661	Bacteria	Proteobacteria	Gammaproteobacteria	Burkholderiales	Comamonadaceae	NA	NA
ASV_662	Bacteria	Actinobacteriota	Thermoleophilia	Solirubrobacterales	Solirubrobacteraceae	Conexibacter	NA
ASV_663	Bacteria	NA	NA	NA	NA	NA	NA
ASV_665	Bacteria	Acidobacteriota	Acidobacteriae	Solibacterales	Solibacteraceae	Candidatus Solibacter	NA
ASV_666	Bacteria	NA	NA	NA	NA	NA	NA
ASV_667	Bacteria	NA	NA	NA	NA	NA	NA
ASV_668	Bacteria	Proteobacteria	Alphaproteobacteria	Sphingomonadales	Sphingomonadaceae	NA	NA
ASV_669	Bacteria	Acidobacteriota	Acidobacteriae	Bryobacterales	Bryobacteraceae	Bryobacter	NA
ASV_670	Bacteria	Acidobacteriota	Acidobacteriae	Acidobacteriales	Acidobacteriaceae (Subgroup 1)	Acidipila	NA
ASV_671	Bacteria	Actinobacteriota	Actinobacteria	Pseudonocardiales	Pseudonocardiaceae	NA	NA
ASV_672	Bacteria	Acidobacteriota	Acidobacteriae	Acidobacteriales	NA	NA	NA
ASV_673	Bacteria	Acidobacteriota	Acidobacteriae	Subgroup 2	NA	NA	NA
ASV_675	Bacteria	Acidobacteriota	Acidobacteriae	NA	NA	NA	NA
ASV_676	Bacteria	Chloroflexi	AD3	NA	NA	NA	NA
ASV_677	Bacteria	Actinobacteriota	Thermoleophilia	Solirubrobacterales	Solirubrobacteraceae	Conexibacter	NA
ASV_678	Bacteria	Acidobacteriota	Acidobacteriae	NA	NA	NA	NA
ASV_679	Bacteria	Acidobacteriota	Acidobacteriae	Acidobacteriales	Acidobacteriaceae (Subgroup 1)	Acidicapsa	NA
ASV_680	Bacteria	Acidobacteriota	Acidobacteriae	Subgroup 2	NA	NA	NA
ASV_681	Bacteria	Acidobacteriota	Acidobacteriae	Bryobacterales	Bryobacteraceae	Bryobacter	NA
ASV_682	Bacteria	Verrucomicrobiota	Verrucomicrobiae	Chthoniobacterales	Chthoniobacteraceae	Chthoniobacter	NA
ASV_683	Bacteria	Acidobacteriota	Acidobacteriae	Acidobacteriales	Acidobacteriaceae (Subgroup 1)	NA	NA
ASV_684	Bacteria	Proteobacteria	Gammaproteobacteria	Legionellales	Legionellaceae	Legionella	NA
ASV_687	Bacteria	Chloroflexi	Ktedonobacteria	Ktedonobacterales	Ktedonobacteraceae	Thermogemmatispora	NA
ASV_688	Bacteria	NA	NA	NA	NA	NA	NA
ASV_690	Bacteria	Acidobacteriota	Acidobacteriae	Subgroup 2	NA	NA	NA
ASV_692	Bacteria	Actinobacteriota	Actinobacteria	Frankiales	Acidothermaceae	Acidothermus	NA
ASV_693	Bacteria	Planctomycetota	Phycisphaerae	Tepidisphaerales	WD2101 soil group	NA	NA
ASV_694	Bacteria	Acidobacteriota	Acidobacteriae	Acidobacteriales	Acidobacteriaceae (Subgroup 1)	Granulicella	NA
ASV_695	Bacteria	Acidobacteriota	Acidobacteriae	Acidobacteriales	Acidobacteriaceae (Subgroup 1)	Occallatibacter	NA
ASV_696	Bacteria	Proteobacteria	Alphaproteobacteria	Rhizobiales	Xanthobacteraceae	NA	NA
ASV_697	Bacteria	GAL15	NA	NA	NA	NA	NA
ASV_698	Bacteria	Proteobacteria	Alphaproteobacteria	Rhizobiales	Rhizobiales Incertae Sedis	Bauldia	NA
ASV_699	Bacteria	Acidobacteriota	Acidobacteriae	Solibacterales	Solibacteraceae	Candidatus Solibacter	NA
ASV_700	Bacteria	Planctomycetota	Phycisphaerae	Tepidisphaerales	CPla-3 termite group	NA	NA
ASV_701	Bacteria	Proteobacteria	Alphaproteobacteria	Acetobacterales	Acetobacteraceae	NA	NA
ASV_702	Bacteria	Planctomycetota	Phycisphaerae	Tepidisphaerales	WD2101 soil group	NA	NA
ASV_703	Archaea	Crenarchaeota	Nitrososphaeria	Group 1.1c	NA	NA	NA
ASV_704	Bacteria	Chloroflexi	Ktedonobacteria	Ktedonobacterales	Ktedonobacteraceae	1921-2	NA
ASV_705	Bacteria	Chloroflexi	Ktedonobacteria	Ktedonobacterales	Ktedonobacteraceae	Thermosporothrix	NA
ASV_706	Bacteria	Proteobacteria	Gammaproteobacteria	NA	NA	NA	NA
ASV_708	Bacteria	WPS-2	NA	NA	NA	NA	NA
ASV_709	Bacteria	Proteobacteria	Alphaproteobacteria	Acetobacterales	Acetobacteraceae	NA	NA
ASV_710	Bacteria	Chloroflexi	Ktedonobacteria	Ktedonobacterales	JG30-KF-AS9	NA	NA
ASV_711	Bacteria	Bacteroidota	Bacteroidia	Sphingobacteriales	Sphingobacteriaceae	NA	NA
ASV_712	Bacteria	Bacteroidota	Bacteroidia	Chitinophagales	Chitinophagaceae	Parafilimonas	NA
ASV_715	Bacteria	Proteobacteria	Alphaproteobacteria	Reyranellales	Reyranellaceae	Reyranella	NA
ASV_716	Bacteria	Acidobacteriota	Acidobacteriae	Acidobacteriales	Acidobacteriaceae (Subgroup 1)	NA	NA
ASV_721	Bacteria	Acidobacteriota	Acidobacteriae	Solibacterales	Solibacteraceae	Candidatus Solibacter	NA
ASV_722	Bacteria	Proteobacteria	Alphaproteobacteria	Rhizobiales	Xanthobacteraceae	NA	NA
ASV_723	Bacteria	Proteobacteria	Gammaproteobacteria	Xanthomonadales	Rhodanobacteraceae	Dyella	NA
ASV_724	Bacteria	Actinobacteriota	Thermoleophilia	Solirubrobacterales	Solirubrobacteraceae	Conexibacter	NA
ASV_725	Bacteria	Actinobacteriota	Acidimicrobiia	NA	NA	NA	NA
ASV_726	Bacteria	Actinobacteriota	Actinobacteria	Frankiales	Acidothermaceae	Acidothermus	NA
ASV_727	Bacteria	Proteobacteria	Gammaproteobacteria	NA	NA	NA	NA
ASV_728	Bacteria	WPS-2	NA	NA	NA	NA	NA
ASV_729	Bacteria	Proteobacteria	Alphaproteobacteria	Rhodospirillales	Magnetospirillaceae	NA	NA
ASV_730	Bacteria	Actinobacteriota	Acidimicrobiia	IMCC26256	NA	NA	NA
ASV_731	Bacteria	Chloroflexi	Ktedonobacteria	Ktedonobacterales	Ktedonobacteraceae	1921-2	NA
ASV_732	Bacteria	Acidobacteriota	Acidobacteriae	Solibacterales	Solibacteraceae	Candidatus Solibacter	NA
ASV_733	Bacteria	Actinobacteriota	Thermoleophilia	Solirubrobacterales	Solirubrobacteraceae	Conexibacter	NA
ASV_734	Bacteria	Actinobacteriota	Actinobacteria	Catenulisporales	Actinospicaceae	Actinospica	NA
ASV_735	Bacteria	Chloroflexi	Ktedonobacteria	Ktedonobacterales	Ktedonobacteraceae	1921-2	NA
ASV_736	Bacteria	Acidobacteriota	Acidobacteriae	Solibacterales	Solibacteraceae	Candidatus Solibacter	NA
ASV_737	Bacteria	Bacteroidota	Bacteroidia	Chitinophagales	Chitinophagaceae	NA	NA
ASV_738	Bacteria	Acidobacteriota	Acidobacteriae	Acidobacteriales	Acidobacteriaceae (Subgroup 1)	NA	NA
ASV_739	Bacteria	Acidobacteriota	Acidobacteriae	Acidobacteriales	Koribacteraceae	Candidatus Koribacter	NA
ASV_740	Bacteria	Bacteroidota	Bacteroidia	Sphingobacteriales	Sphingobacteriaceae	Mucilaginibacter	NA
ASV_741	Bacteria	Acidobacteriota	Acidobacteriae	Subgroup 2	NA	NA	NA
ASV_742	Bacteria	Myxococcota	Myxococcia	Myxococcales	Myxococcaceae	P3OB-42	NA
ASV_743	Bacteria	Actinobacteriota	Actinobacteria	NA	NA	NA	NA
ASV_744	Bacteria	Acidobacteriota	Acidobacteriae	Acidobacteriales	Acidobacteriaceae (Subgroup 1)	Occallatibacter	NA
ASV_745	Bacteria	Acidobacteriota	Acidobacteriae	NA	NA	NA	NA
ASV_746	Bacteria	Planctomycetota	Planctomycetes	Pirellulales	Pirellulaceae	NA	NA
ASV_747	Bacteria	RCP2-54	NA	NA	NA	NA	NA
ASV_748	Bacteria	Proteobacteria	Alphaproteobacteria	Elsterales	URHD0088	NA	NA
ASV_749	Bacteria	NA	NA	NA	NA	NA	NA
ASV_750	Bacteria	Acidobacteriota	Acidobacteriae	Subgroup 2	NA	NA	NA
ASV_751	Bacteria	Verrucomicrobiota	Verrucomicrobiae	Pedosphaerales	Pedosphaeraceae	NA	NA
ASV_752	Bacteria	Proteobacteria	Gammaproteobacteria	Gammaproteobacteria Incertae Sedis	Unknown Family_4	Acidibacter	NA
ASV_753	Bacteria	Acidobacteriota	Acidobacteriae	Solibacterales	Solibacteraceae	Candidatus Solibacter	NA
ASV_755	Bacteria	NA	NA	NA	NA	NA	NA
ASV_758	Bacteria	Chloroflexi	AD3	NA	NA	NA	NA
ASV_759	Bacteria	Proteobacteria	Gammaproteobacteria	Burkholderiales	Burkholderiaceae	Burkholderia-Caballeronia-Paraburkholderia	NA
ASV_760	Bacteria	NA	NA	NA	NA	NA	NA
ASV_762	Bacteria	Acidobacteriota	Acidobacteriae	Bryobacterales	Bryobacteraceae	Bryobacter	NA
ASV_763	Bacteria	Actinobacteriota	Thermoleophilia	Gaiellales	Gaiellaceae	Gaiella	NA
ASV_764	Bacteria	Bacteroidota	Bacteroidia	Sphingobacteriales	Sphingobacteriaceae	NA	NA
ASV_765	Bacteria	Proteobacteria	Gammaproteobacteria	Burkholderiales	Burkholderiaceae	Burkholderia-Caballeronia-Paraburkholderia	NA
ASV_767	Bacteria	Acidobacteriota	Acidobacteriae	Solibacterales	Solibacteraceae	Candidatus Solibacter	NA
ASV_768	Bacteria	Acidobacteriota	Acidobacteriae	Subgroup 2	NA	NA	NA
ASV_769	Bacteria	Actinobacteriota	Thermoleophilia	Solirubrobacterales	Solirubrobacteraceae	Conexibacter	NA
ASV_770	Bacteria	Proteobacteria	Alphaproteobacteria	Caulobacterales	Caulobacteraceae	PMMR1	NA
ASV_771	Bacteria	Chloroflexi	Ktedonobacteria	Ktedonobacterales	Ktedonobacteraceae	FCPS473	NA
ASV_772	Bacteria	Bacteroidota	Bacteroidia	Chitinophagales	Chitinophagaceae	Puia	NA
ASV_773	Bacteria	Chloroflexi	TK10	NA	NA	NA	NA
ASV_775	Bacteria	Actinobacteriota	Acidimicrobiia	IMCC26256	NA	NA	NA
ASV_776	Bacteria	Verrucomicrobiota	Verrucomicrobiae	Pedosphaerales	Pedosphaeraceae	NA	NA
ASV_778	Bacteria	Actinobacteriota	Actinobacteria	Corynebacteriales	Mycobacteriaceae	NA	NA
ASV_779	Bacteria	Proteobacteria	Gammaproteobacteria	Salinisphaerales	Solimonadaceae	Nevskia	NA
ASV_780	Bacteria	Acidobacteriota	Acidobacteriae	Subgroup 2	NA	NA	NA
ASV_783	Bacteria	Acidobacteriota	Acidobacteriae	Acidobacteriales	Acidobacteriaceae (Subgroup 1)	Occallatibacter	NA
ASV_784	Bacteria	Actinobacteriota	Thermoleophilia	Gaiellales	Gaiellaceae	Gaiella	NA
ASV_785	Bacteria	NA	NA	NA	NA	NA	NA
ASV_786	Bacteria	Proteobacteria	Alphaproteobacteria	Rhizobiales	Beijerinckiaceae	NA	NA
ASV_787	Bacteria	Acidobacteriota	Acidobacteriae	Acidobacteriales	Acidobacteriaceae (Subgroup 1)	Acidobacterium	NA
ASV_788	Bacteria	Verrucomicrobiota	Verrucomicrobiae	Opitutales	Opitutaceae	Lacunisphaera	NA
ASV_789	Bacteria	NA	NA	NA	NA	NA	NA
ASV_790	Bacteria	Proteobacteria	Gammaproteobacteria	WD260	NA	NA	NA
ASV_791	Bacteria	Actinobacteriota	Thermoleophilia	Solirubrobacterales	Solirubrobacteraceae	Conexibacter	NA
ASV_792	Bacteria	Myxococcota	Polyangia	Polyangiales	Polyangiaceae	Pajaroellobacter	NA
ASV_794	Bacteria	Acidobacteriota	Acidobacteriae	NA	NA	NA	NA
ASV_795	Bacteria	Chloroflexi	Ktedonobacteria	Ktedonobacterales	JG30-KF-AS9	NA	NA
ASV_796	Bacteria	Acidobacteriota	Acidobacteriae	Subgroup 2	NA	NA	NA
ASV_797	Bacteria	Acidobacteriota	Vicinamibacteria	Subgroup 17	NA	NA	NA
ASV_798	Bacteria	Acidobacteriota	Acidobacteriae	Subgroup 2	NA	NA	NA
ASV_799	Bacteria	Planctomycetota	Planctomycetes	Gemmatales	Gemmataceae	Gemmata	NA
ASV_800	Archaea	Crenarchaeota	Nitrososphaeria	Group 1.1c	NA	NA	NA
ASV_801	Bacteria	Acidobacteriota	Acidobacteriae	NA	NA	NA	NA
ASV_802	Bacteria	Bacteroidota	Bacteroidia	Sphingobacteriales	Sphingobacteriaceae	Mucilaginibacter	NA
ASV_803	Bacteria	Bacteroidota	Bacteroidia	Sphingobacteriales	Sphingobacteriaceae	Mucilaginibacter	NA
ASV_804	Bacteria	Planctomycetota	Planctomycetes	Pirellulales	Pirellulaceae	NA	NA
ASV_805	Bacteria	Acidobacteriota	Acidobacteriae	Subgroup 2	NA	NA	NA
ASV_806	Bacteria	Bdellovibrionota	Bdellovibrionia	Bdellovibrionales	Bdellovibrionaceae	Bdellovibrio	NA
ASV_807	Bacteria	Acidobacteriota	Acidobacteriae	NA	NA	NA	NA
ASV_808	Bacteria	Bdellovibrionota	Bdellovibrionia	Bdellovibrionales	Bdellovibrionaceae	Bdellovibrio	NA
ASV_809	Bacteria	Proteobacteria	Gammaproteobacteria	Enterobacterales	NA	NA	NA
ASV_810	Bacteria	Verrucomicrobiota	Verrucomicrobiae	Pedosphaerales	Pedosphaeraceae	NA	NA
ASV_811	Bacteria	Proteobacteria	Alphaproteobacteria	Rhizobiales	NA	NA	NA
ASV_812	Bacteria	RCP2-54	NA	NA	NA	NA	NA
ASV_813	Bacteria	Actinobacteriota	Actinobacteria	Catenulisporales	Actinospicaceae	Actinospica	NA
ASV_814	Bacteria	Myxococcota	Polyangia	Polyangiales	Polyangiaceae	Pajaroellobacter	NA
ASV_815	Bacteria	Myxococcota	Polyangia	Haliangiales	Haliangiaceae	Haliangium	NA
ASV_816	Bacteria	Proteobacteria	Gammaproteobacteria	WD260	NA	NA	NA
ASV_818	Bacteria	Bacteroidota	Bacteroidia	Sphingobacteriales	Sphingobacteriaceae	Mucilaginibacter	NA
ASV_819	Bacteria	Actinobacteriota	Actinobacteria	Corynebacteriales	Mycobacteriaceae	Mycobacterium	NA
ASV_820	Bacteria	Acidobacteriota	Acidobacteriae	Bryobacterales	Bryobacteraceae	Bryobacter	NA
ASV_821	Bacteria	NA	NA	NA	NA	NA	NA
ASV_822	Bacteria	Verrucomicrobiota	Verrucomicrobiae	Chthoniobacterales	Chthoniobacteraceae	Chthoniobacter	NA
ASV_823	Bacteria	Actinobacteriota	Actinobacteria	Corynebacteriales	Mycobacteriaceae	Mycobacterium	NA
ASV_827	Bacteria	Acidobacteriota	Acidobacteriae	Solibacterales	Solibacteraceae	Candidatus Solibacter	NA
ASV_828	Bacteria	Acidobacteriota	Acidobacteriae	Solibacterales	Solibacteraceae	Candidatus Solibacter	NA
ASV_829	Bacteria	Chloroflexi	NA	NA	NA	NA	NA
ASV_831	Bacteria	Proteobacteria	Gammaproteobacteria	Gammaproteobacteria Incertae Sedis	Unknown Family_4	Acidibacter	NA
ASV_832	Bacteria	Bacteroidota	Bacteroidia	Chitinophagales	Chitinophagaceae	Puia	NA
ASV_833	Bacteria	Acidobacteriota	Acidobacteriae	Bryobacterales	Bryobacteraceae	Bryobacter	NA
ASV_834	Bacteria	Bacteroidota	Bacteroidia	Flavobacteriales	Weeksellaceae	Chryseobacterium	NA
ASV_838	Bacteria	Actinobacteriota	Actinobacteria	Frankiales	Acidothermaceae	Acidothermus	NA
ASV_839	Bacteria	Proteobacteria	Alphaproteobacteria	Rhizobiales	Xanthobacteraceae	NA	NA
ASV_840	Bacteria	Acidobacteriota	Acidobacteriae	Acidobacteriales	Koribacteraceae	Candidatus Koribacter	NA
ASV_842	Bacteria	Bacteroidota	Bacteroidia	Sphingobacteriales	Sphingobacteriaceae	NA	NA
ASV_843	Bacteria	Planctomycetota	Planctomycetes	Pirellulales	Pirellulaceae	NA	NA
ASV_844	Bacteria	Proteobacteria	Alphaproteobacteria	NA	NA	NA	NA
ASV_848	Bacteria	Proteobacteria	Gammaproteobacteria	Xanthomonadales	Rhodanobacteraceae	Rudaea	NA
ASV_849	Bacteria	Planctomycetota	Planctomycetes	Pirellulales	Pirellulaceae	NA	NA
ASV_850	Bacteria	Acidobacteriota	Acidobacteriae	Acidobacteriales	Acidobacteriaceae (Subgroup 1)	NA	NA
ASV_851	Bacteria	Proteobacteria	Gammaproteobacteria	Gammaproteobacteria Incertae Sedis	Unknown Family_4	Acidibacter	NA
ASV_852	Bacteria	Myxococcota	Myxococcia	Myxococcales	NA	NA	NA
ASV_855	Bacteria	Elusimicrobiota	Lineage IIa	NA	NA	NA	NA
ASV_856	Bacteria	Actinobacteriota	Actinobacteria	Frankiales	Acidothermaceae	Acidothermus	NA
ASV_857	Bacteria	NA	NA	NA	NA	NA	NA
ASV_858	Bacteria	Acidobacteriota	Acidobacteriae	Acidobacteriales	Koribacteraceae	Candidatus Koribacter	NA
ASV_860	Bacteria	Acidobacteriota	NA	NA	NA	NA	NA
ASV_861	Bacteria	Acidobacteriota	Acidobacteriae	NA	NA	NA	NA
ASV_863	Bacteria	Planctomycetota	Planctomycetes	Isosphaerales	Isosphaeraceae	NA	NA
ASV_864	Bacteria	Actinobacteriota	Actinobacteria	Pseudonocardiales	Pseudonocardiaceae	NA	NA
ASV_865	Bacteria	Proteobacteria	Alphaproteobacteria	Rhizobiales	Xanthobacteraceae	NA	NA
ASV_866	Bacteria	Proteobacteria	Alphaproteobacteria	Rhizobiales	Beijerinckiaceae	Methylobacterium-Methylorubrum	NA
ASV_867	Bacteria	Acidobacteriota	Acidobacteriae	Subgroup 2	NA	NA	NA
ASV_868	Bacteria	Proteobacteria	Alphaproteobacteria	Rhizobiales	Beijerinckiaceae	Methylovirgula	NA
ASV_869	Bacteria	Planctomycetota	Phycisphaerae	Tepidisphaerales	WD2101 soil group	NA	NA
ASV_870	Bacteria	Acidobacteriota	Acidobacteriae	Acidobacteriales	Acidobacteriaceae (Subgroup 1)	NA	NA
ASV_872	Bacteria	Acidobacteriota	Acidobacteriae	Acidobacteriales	Koribacteraceae	Candidatus Koribacter	NA
ASV_874	Bacteria	Actinobacteriota	Thermoleophilia	Solirubrobacterales	Solirubrobacteraceae	Conexibacter	NA
ASV_875	Bacteria	Proteobacteria	Alphaproteobacteria	Rhizobiales	Xanthobacteraceae	NA	NA
ASV_876	Bacteria	Planctomycetota	Phycisphaerae	Tepidisphaerales	CPla-3 termite group	NA	NA
ASV_877	Bacteria	Bacteroidota	Bacteroidia	Chitinophagales	Chitinophagaceae	NA	NA
ASV_878	Bacteria	Actinobacteriota	Actinobacteria	NA	NA	NA	NA
ASV_879	Bacteria	Chloroflexi	TK10	NA	NA	NA	NA
ASV_880	Bacteria	Acidobacteriota	Acidobacteriae	Subgroup 2	NA	NA	NA
ASV_881	Bacteria	Dependentiae	Babeliae	Babeliales	NA	NA	NA
ASV_882	Bacteria	WPS-2	NA	NA	NA	NA	NA
ASV_883	Bacteria	Bacteroidota	Bacteroidia	NA	NA	NA	NA
ASV_885	Bacteria	Acidobacteriota	Acidobacteriae	NA	NA	NA	NA
ASV_886	Bacteria	NA	NA	NA	NA	NA	NA
ASV_887	Bacteria	Actinobacteriota	Actinobacteria	Pseudonocardiales	Pseudonocardiaceae	Crossiella	NA
ASV_888	Bacteria	NA	NA	NA	NA	NA	NA
ASV_889	Bacteria	Acidobacteriota	Acidobacteriae	Subgroup 2	NA	NA	NA
ASV_891	Bacteria	Proteobacteria	Alphaproteobacteria	Acetobacterales	Acetobacteraceae	NA	NA
ASV_892	Bacteria	Actinobacteriota	Actinobacteria	Frankiales	Acidothermaceae	Acidothermus	NA
ASV_893	Bacteria	Proteobacteria	Alphaproteobacteria	Caulobacterales	Caulobacteraceae	NA	NA
ASV_894	Bacteria	Elusimicrobiota	Lineage IIa	NA	NA	NA	NA
ASV_895	Bacteria	Acidobacteriota	Acidobacteriae	Acidobacteriales	Acidobacteriaceae (Subgroup 1)	NA	NA
ASV_896	Bacteria	Proteobacteria	Gammaproteobacteria	WD260	NA	NA	NA
ASV_897	Bacteria	Planctomycetota	Planctomycetes	Pirellulales	Pirellulaceae	NA	NA
ASV_898	Bacteria	Verrucomicrobiota	Verrucomicrobiae	Pedosphaerales	Pedosphaeraceae	NA	NA
ASV_899	Bacteria	NA	NA	NA	NA	NA	NA
ASV_900	Bacteria	Acidobacteriota	Acidobacteriae	Subgroup 2	NA	NA	NA
ASV_901	Bacteria	Acidobacteriota	Acidobacteriae	Subgroup 13	NA	NA	NA
ASV_902	Bacteria	Acidobacteriota	Blastocatellia	2024-11-01	NA	NA	NA
ASV_904	Bacteria	FCPU426	NA	NA	NA	NA	NA
ASV_905	Bacteria	Acidobacteriota	Acidobacteriae	Solibacterales	Solibacteraceae	Candidatus Solibacter	NA
ASV_906	Bacteria	Proteobacteria	Gammaproteobacteria	Xanthomonadales	Rhodanobacteraceae	Dyella	NA
ASV_908	Bacteria	Verrucomicrobiota	Verrucomicrobiae	Pedosphaerales	Pedosphaeraceae	NA	NA
ASV_909	Bacteria	Actinobacteriota	Actinobacteria	Frankiales	Acidothermaceae	Acidothermus	NA
ASV_910	Bacteria	Bdellovibrionota	Oligoflexia	0319-6G20	NA	NA	NA
ASV_911	Bacteria	Dependentiae	Babeliae	Babeliales	Vermiphilaceae	NA	NA
ASV_912	Bacteria	Bacteroidota	Bacteroidia	Chitinophagales	Chitinophagaceae	Edaphobaculum	NA
ASV_913	Bacteria	Myxococcota	Polyangia	Haliangiales	Haliangiaceae	Haliangium	NA
ASV_914	Bacteria	Verrucomicrobiota	Verrucomicrobiae	Pedosphaerales	Pedosphaeraceae	NA	NA
ASV_915	Bacteria	Actinobacteriota	Thermoleophilia	Solirubrobacterales	Solirubrobacteraceae	Conexibacter	NA
ASV_916	Bacteria	NA	NA	NA	NA	NA	NA
ASV_917	Bacteria	NA	NA	NA	NA	NA	NA
ASV_918	Bacteria	Acidobacteriota	Acidobacteriae	Bryobacterales	Bryobacteraceae	Bryobacter	NA
ASV_919	Bacteria	Acidobacteriota	Acidobacteriae	Acidobacteriales	Acidobacteriaceae (Subgroup 1)	Terriglobus	NA
ASV_920	Bacteria	Acidobacteriota	Acidobacteriae	Acidobacteriales	Acidobacteriaceae (Subgroup 1)	Occallatibacter	NA
ASV_921	Bacteria	Myxococcota	Polyangia	Polyangiales	Polyangiaceae	Pajaroellobacter	NA
ASV_922	Bacteria	Acidobacteriota	Acidobacteriae	Acidobacteriales	Acidobacteriaceae (Subgroup 1)	Occallatibacter	NA
ASV_924	Bacteria	NA	NA	NA	NA	NA	NA
ASV_925	Bacteria	Bacteroidota	Bacteroidia	Sphingobacteriales	Sphingobacteriaceae	Mucilaginibacter	NA
ASV_926	Bacteria	Acidobacteriota	Acidobacteriae	Acidobacteriales	Acidobacteriaceae (Subgroup 1)	Terriglobus	NA
ASV_927	Bacteria	Proteobacteria	Alphaproteobacteria	Rhizobiales	Xanthobacteraceae	NA	NA
ASV_929	Bacteria	Proteobacteria	Alphaproteobacteria	Rhizobiales	Beijerinckiaceae	NA	NA
ASV_930	Bacteria	Acidobacteriota	Acidobacteriae	Acidobacteriales	Acidobacteriaceae (Subgroup 1)	Granulicella	NA
ASV_934	Bacteria	Proteobacteria	Gammaproteobacteria	Diplorickettsiales	Diplorickettsiaceae	Aquicella	NA
ASV_935	Bacteria	Planctomycetota	Planctomycetes	Isosphaerales	Isosphaeraceae	Singulisphaera	NA
ASV_937	Bacteria	NA	NA	NA	NA	NA	NA
ASV_938	Bacteria	Proteobacteria	Gammaproteobacteria	WD260	NA	NA	NA
ASV_939	Bacteria	Acidobacteriota	Acidobacteriae	Bryobacterales	Bryobacteraceae	Bryobacter	NA
ASV_940	Bacteria	Acidobacteriota	Acidobacteriae	Bryobacterales	Bryobacteraceae	Bryobacter	NA
ASV_941	Bacteria	Acidobacteriota	Acidobacteriae	Bryobacterales	Bryobacteraceae	Bryobacter	NA
ASV_943	Bacteria	Verrucomicrobiota	Verrucomicrobiae	Pedosphaerales	Pedosphaeraceae	ADurb.Bin063-1	NA
ASV_946	Bacteria	Actinobacteriota	Thermoleophilia	Solirubrobacterales	Solirubrobacteraceae	Conexibacter	NA
ASV_947	Bacteria	Actinobacteriota	Actinobacteria	Frankiales	Acidothermaceae	Acidothermus	NA
ASV_948	Bacteria	Bacteroidota	Bacteroidia	Sphingobacteriales	Sphingobacteriaceae	Mucilaginibacter	NA
ASV_949	Bacteria	Proteobacteria	Alphaproteobacteria	NA	NA	NA	NA
ASV_950	Bacteria	Bacteroidota	Bacteroidia	Chitinophagales	37-13	NA	NA
ASV_951	Bacteria	Acidobacteriota	Acidobacteriae	Acidobacteriales	Acidobacteriaceae (Subgroup 1)	Granulicella	NA
ASV_952	Bacteria	FCPU426	NA	NA	NA	NA	NA
ASV_953	Bacteria	Verrucomicrobiota	Verrucomicrobiae	Chthoniobacterales	Chthoniobacteraceae	LD29	NA
ASV_954	Bacteria	Acidobacteriota	Acidobacteriae	Acidobacteriales	Koribacteraceae	Candidatus Koribacter	NA
ASV_955	Bacteria	Bacteroidota	Bacteroidia	Chitinophagales	37-13	NA	NA
ASV_957	Bacteria	Bacteroidota	Bacteroidia	Chitinophagales	Chitinophagaceae	NA	NA
ASV_958	Bacteria	Acidobacteriota	Acidobacteriae	Bryobacterales	Bryobacteraceae	Bryobacter	NA
ASV_960	Bacteria	Acidobacteriota	Acidobacteriae	NA	NA	NA	NA
ASV_961	Bacteria	Bdellovibrionota	Oligoflexia	0319-6G20	NA	NA	NA
ASV_962	Bacteria	NA	NA	NA	NA	NA	NA
ASV_963	Bacteria	Proteobacteria	Alphaproteobacteria	Azospirillales	Inquilinaceae	Inquilinus	NA
ASV_965	Bacteria	Acidobacteriota	Acidobacteriae	Subgroup 2	NA	NA	NA
ASV_966	Bacteria	Chloroflexi	Ktedonobacteria	Ktedonobacterales	Ktedonobacteraceae	HSB OF53-F07	NA
ASV_968	Bacteria	Dependentiae	Babeliae	Babeliales	NA	NA	NA
ASV_971	Bacteria	Proteobacteria	Alphaproteobacteria	Rhizobiales	Xanthobacteraceae	NA	NA
ASV_973	Bacteria	Chloroflexi	Ktedonobacteria	Ktedonobacterales	Ktedonobacteraceae	1921-2	NA
ASV_974	Bacteria	Acidobacteriota	Acidobacteriae	Bryobacterales	Bryobacteraceae	Bryobacter	NA
ASV_975	Bacteria	Acidobacteriota	Acidobacteriae	Subgroup 2	NA	NA	NA
ASV_976	Bacteria	Acidobacteriota	Acidobacteriae	Solibacterales	Solibacteraceae	Candidatus Solibacter	NA
ASV_977	Bacteria	Planctomycetota	Phycisphaerae	Tepidisphaerales	WD2101 soil group	NA	NA
ASV_978	Bacteria	Acidobacteriota	Acidobacteriae	Subgroup 13	NA	NA	NA
ASV_979	Bacteria	Acidobacteriota	Subgroup 5	NA	NA	NA	NA
ASV_980	Bacteria	Acidobacteriota	Acidobacteriae	Acidobacteriales	NA	NA	NA
ASV_981	Bacteria	Bdellovibrionota	Oligoflexia	0319-6G20	NA	NA	NA
ASV_982	Bacteria	Proteobacteria	Alphaproteobacteria	Acetobacterales	Acetobacteraceae	NA	NA
ASV_983	Bacteria	Acidobacteriota	Thermoanaerobaculia	Thermoanaerobaculales	Thermoanaerobaculaceae	Subgroup 10	NA
ASV_984	Bacteria	NA	NA	NA	NA	NA	NA
ASV_985	Bacteria	Proteobacteria	Gammaproteobacteria	Burkholderiales	NA	NA	NA
ASV_986	Bacteria	NA	NA	NA	NA	NA	NA
ASV_987	Bacteria	NA	NA	NA	NA	NA	NA
ASV_988	Bacteria	Actinobacteriota	Actinobacteria	Corynebacteriales	Nocardiaceae	Nocardia	NA
ASV_989	Bacteria	Chloroflexi	TK10	NA	NA	NA	NA
ASV_990	Bacteria	Acidobacteriota	Acidobacteriae	Subgroup 2	NA	NA	NA
ASV_991	Bacteria	Acidobacteriota	Acidobacteriae	Subgroup 2	NA	NA	NA
ASV_992	Bacteria	Cyanobacteria	Cyanobacteriia	Chloroplast	NA	NA	NA
ASV_993	Bacteria	Actinobacteriota	Thermoleophilia	Solirubrobacterales	Solirubrobacteraceae	Conexibacter	NA
ASV_994	Bacteria	NA	NA	NA	NA	NA	NA
ASV_995	Bacteria	Bdellovibrionota	Bdellovibrionia	Bdellovibrionales	Bdellovibrionaceae	Bdellovibrio	NA
ASV_996	Bacteria	Actinobacteriota	NA	NA	NA	NA	NA
ASV_997	Bacteria	Acidobacteriota	Acidobacteriae	Solibacterales	Solibacteraceae	Candidatus Solibacter	NA
ASV_998	Bacteria	Proteobacteria	Alphaproteobacteria	Reyranellales	Reyranellaceae	Reyranella	NA
ASV_1000	Bacteria	NA	NA	NA	NA	NA	NA
ASV_1001	Bacteria	Armatimonadota	Chthonomonadetes	Chthonomonadales	Chthonomonadaceae	Chthonomonas	NA
ASV_1002	Bacteria	Myxococcota	Polyangia	Polyangiales	Polyangiaceae	Pajaroellobacter	NA
ASV_1003	Bacteria	Acidobacteriota	Acidobacteriae	Acidobacteriales	Acidobacteriaceae (Subgroup 1)	NA	NA
ASV_1004	Bacteria	Proteobacteria	Gammaproteobacteria	Gammaproteobacteria Incertae Sedis	Unknown Family_4	Acidibacter	NA
ASV_1005	Bacteria	Chloroflexi	Ktedonobacteria	Ktedonobacterales	Ktedonobacteraceae	FCPS473	NA
ASV_1006	Bacteria	NA	NA	NA	NA	NA	NA
ASV_1007	Bacteria	Acidobacteriota	Acidobacteriae	Subgroup 2	NA	NA	NA
ASV_1008	Bacteria	Proteobacteria	Alphaproteobacteria	Rhizobiales	Xanthobacteraceae	NA	NA
ASV_1009	Bacteria	Acidobacteriota	Acidobacteriae	Bryobacterales	Bryobacteraceae	Bryobacter	NA
ASV_1010	Bacteria	RCP2-54	NA	NA	NA	NA	NA
ASV_1012	Bacteria	Chloroflexi	SHA-26	NA	NA	NA	NA
ASV_1013	Bacteria	Bacteroidota	Bacteroidia	Chitinophagales	Chitinophagaceae	NA	NA
ASV_1014	Bacteria	Verrucomicrobiota	Chlamydiae	Chlamydiales	NA	NA	NA
ASV_1015	Bacteria	Acidobacteriota	Acidobacteriae	Acidobacteriales	Koribacteraceae	Candidatus Koribacter	NA
ASV_1016	Bacteria	NA	NA	NA	NA	NA	NA
ASV_1018	Bacteria	WPS-2	NA	NA	NA	NA	NA
ASV_1019	Bacteria	Planctomycetota	Planctomycetes	Pirellulales	Pirellulaceae	NA	NA
ASV_1021	Bacteria	Acidobacteriota	Acidobacteriae	NA	NA	NA	NA
ASV_1022	Bacteria	Bacteroidota	Bacteroidia	Sphingobacteriales	Sphingobacteriaceae	Mucilaginibacter	NA
ASV_1023	Bacteria	Acidobacteriota	Acidobacteriae	Acidobacteriales	NA	NA	NA
ASV_1024	Bacteria	NA	NA	NA	NA	NA	NA
ASV_1025	Bacteria	Proteobacteria	Alphaproteobacteria	NA	NA	NA	NA
ASV_1026	Bacteria	Dependentiae	Babeliae	Babeliales	NA	NA	NA
ASV_1028	Bacteria	Chloroflexi	Ktedonobacteria	Ktedonobacterales	JG30-KF-AS9	NA	NA
ASV_1029	Bacteria	Actinobacteriota	Actinobacteria	Catenulisporales	Actinospicaceae	Actinospica	NA
ASV_1030	Bacteria	NA	NA	NA	NA	NA	NA
ASV_1033	Bacteria	Acidobacteriota	Acidobacteriae	Subgroup 2	NA	NA	NA
ASV_1034	Bacteria	Acidobacteriota	Acidobacteriae	NA	NA	NA	NA
ASV_1035	Bacteria	Planctomycetota	Phycisphaerae	Tepidisphaerales	WD2101 soil group	NA	NA
ASV_1036	Bacteria	Proteobacteria	Alphaproteobacteria	Rhizobiales	Beijerinckiaceae	1174-901-12	NA
ASV_1039	Bacteria	Acidobacteriota	Vicinamibacteria	Vicinamibacterales	Vicinamibacteraceae	NA	NA
ASV_1040	Bacteria	Acidobacteriota	Acidobacteriae	Acidobacteriales	Koribacteraceae	Candidatus Koribacter	NA
ASV_1041	Bacteria	Verrucomicrobiota	Verrucomicrobiae	Pedosphaerales	Pedosphaeraceae	Pedosphaera	NA
ASV_1042	Bacteria	Acidobacteriota	Acidobacteriae	NA	NA	NA	NA
ASV_1046	Bacteria	WPS-2	NA	NA	NA	NA	NA
ASV_1047	Bacteria	Acidobacteriota	Acidobacteriae	Solibacterales	Solibacteraceae	Candidatus Solibacter	NA
ASV_1048	Bacteria	Verrucomicrobiota	Verrucomicrobiae	Opitutales	Opitutaceae	Opitutus	NA
ASV_1049	Bacteria	Verrucomicrobiota	Verrucomicrobiae	Chthoniobacterales	Chthoniobacteraceae	NA	NA
ASV_1051	Bacteria	Proteobacteria	Gammaproteobacteria	Gammaproteobacteria Incertae Sedis	Unknown Family_4	Acidibacter	NA
ASV_1053	Bacteria	Proteobacteria	Alphaproteobacteria	Micropepsales	Micropepsaceae	NA	NA
ASV_1054	Bacteria	Bacteroidota	Bacteroidia	Chitinophagales	Chitinophagaceae	Edaphobaculum	NA
ASV_1055	Bacteria	Dependentiae	Babeliae	Babeliales	Vermiphilaceae	NA	NA
ASV_1056	Bacteria	Bacteroidota	Bacteroidia	Chitinophagales	Chitinophagaceae	NA	NA
ASV_1057	Bacteria	Acidobacteriota	Acidobacteriae	Subgroup 2	NA	NA	NA
ASV_1059	Bacteria	Acidobacteriota	Acidobacteriae	Acidobacteriales	Koribacteraceae	Candidatus Koribacter	NA
ASV_1060	Bacteria	Acidobacteriota	Acidobacteriae	Bryobacterales	Bryobacteraceae	Bryobacter	NA
ASV_1061	Bacteria	WPS-2	NA	NA	NA	NA	NA
ASV_1062	Bacteria	Planctomycetota	Phycisphaerae	Tepidisphaerales	WD2101 soil group	NA	NA
ASV_1063	Bacteria	Actinobacteriota	Acidimicrobiia	IMCC26256	NA	NA	NA
ASV_1064	Bacteria	Proteobacteria	Alphaproteobacteria	Rickettsiales	SM2D12	NA	NA
ASV_1065	Bacteria	Actinobacteriota	Actinobacteria	Corynebacteriales	Mycobacteriaceae	Mycobacterium	NA
ASV_1066	Bacteria	Verrucomicrobiota	Verrucomicrobiae	Pedosphaerales	Pedosphaeraceae	Pedosphaera	NA
ASV_1067	Bacteria	Proteobacteria	NA	NA	NA	NA	NA
ASV_1068	Bacteria	Proteobacteria	Alphaproteobacteria	Rhizobiales	Xanthobacteraceae	Bradyrhizobium	NA
ASV_1071	Bacteria	Patescibacteria	Microgenomatia	Candidatus Woesebacteria	NA	NA	NA
ASV_1072	Bacteria	Chloroflexi	Ktedonobacteria	Ktedonobacterales	JG30-KF-AS9	NA	NA
ASV_1073	Bacteria	Acidobacteriota	Acidobacteriae	Subgroup 2	NA	NA	NA
ASV_1074	Bacteria	Planctomycetota	Planctomycetes	Pirellulales	Pirellulaceae	NA	NA
ASV_1075	Bacteria	Desulfobacterota	Desulfuromonadia	Geobacterales	Geobacteraceae	NA	NA
ASV_1076	Bacteria	Chloroflexi	Ktedonobacteria	Ktedonobacterales	Ktedonobacteraceae	NA	NA
ASV_1078	Bacteria	Acidobacteriota	Acidobacteriae	Acidobacteriales	NA	NA	NA
ASV_1079	Bacteria	Myxococcota	Polyangia	Polyangiales	Polyangiaceae	Pajaroellobacter	NA
ASV_1080	Bacteria	Bdellovibrionota	Bdellovibrionia	Bdellovibrionales	Bdellovibrionaceae	Bdellovibrio	NA
ASV_1081	Bacteria	Dependentiae	Babeliae	Babeliales	Vermiphilaceae	NA	NA
ASV_1082	Bacteria	RCP2-54	NA	NA	NA	NA	NA
ASV_1083	Bacteria	Bacteroidota	Bacteroidia	Sphingobacteriales	Sphingobacteriaceae	Mucilaginibacter	NA
ASV_1087	Bacteria	Acidobacteriota	Acidobacteriae	NA	NA	NA	NA
ASV_1088	Bacteria	Acidobacteriota	Acidobacteriae	Bryobacterales	Bryobacteraceae	Bryobacter	NA
ASV_1089	Bacteria	Proteobacteria	Alphaproteobacteria	NA	NA	NA	NA
ASV_1090	Bacteria	NA	NA	NA	NA	NA	NA
ASV_1092	Bacteria	Acidobacteriota	Acidobacteriae	Bryobacterales	Bryobacteraceae	Bryobacter	NA
ASV_1097	Bacteria	Verrucomicrobiota	Chlamydiae	Chlamydiales	cvE6	NA	NA
ASV_1098	Bacteria	Actinobacteriota	Actinobacteria	Frankiales	Acidothermaceae	Acidothermus	NA
ASV_1099	Bacteria	Proteobacteria	Alphaproteobacteria	Acetobacterales	Acetobacteraceae	NA	NA
ASV_1101	Bacteria	Acidobacteriota	Acidobacteriae	Acidobacteriales	NA	NA	NA
ASV_1102	Bacteria	Proteobacteria	Gammaproteobacteria	NA	NA	NA	NA
ASV_1103	Bacteria	Bacteroidota	Bacteroidia	Sphingobacteriales	Sphingobacteriaceae	Mucilaginibacter	NA
ASV_1105	Bacteria	Acidobacteriota	Holophagae	Subgroup 7	NA	NA	NA
ASV_1106	Bacteria	Proteobacteria	Alphaproteobacteria	Rhizobiales	Xanthobacteraceae	NA	NA
ASV_1108	Bacteria	Dependentiae	Babeliae	Babeliales	NA	NA	NA
ASV_1109	Bacteria	Acidobacteriota	Acidobacteriae	Acidobacteriales	Acidobacteriaceae (Subgroup 1)	Edaphobacter	NA
ASV_1110	Bacteria	Proteobacteria	Alphaproteobacteria	Rhizobiales	Beijerinckiaceae	Roseiarcus	NA
ASV_1111	Bacteria	Acidobacteriota	Acidobacteriae	Acidobacteriales	NA	NA	NA
ASV_1112	Bacteria	Proteobacteria	Alphaproteobacteria	NA	NA	NA	NA
ASV_1113	Bacteria	Proteobacteria	Gammaproteobacteria	Burkholderiales	Oxalobacteraceae	Massilia	NA
ASV_1115	Bacteria	Proteobacteria	Alphaproteobacteria	Rhizobiales	Xanthobacteraceae	NA	NA
ASV_1116	Bacteria	WPS-2	NA	NA	NA	NA	NA
ASV_1119	Bacteria	Acidobacteriota	Acidobacteriae	Subgroup 2	NA	NA	NA
ASV_1120	Bacteria	Acidobacteriota	Acidobacteriae	Acidobacteriales	Acidobacteriaceae (Subgroup 1)	NA	NA
ASV_1121	Bacteria	Acidobacteriota	Acidobacteriae	Bryobacterales	Bryobacteraceae	Bryobacter	NA
ASV_1122	Bacteria	Planctomycetota	Planctomycetes	Isosphaerales	Isosphaeraceae	NA	NA
ASV_1123	Bacteria	RCP2-54	NA	NA	NA	NA	NA
ASV_1124	Bacteria	Acidobacteriota	Acidobacteriae	Acidobacteriales	Acidobacteriaceae (Subgroup 1)	NA	NA
ASV_1125	Bacteria	Actinobacteriota	Actinobacteria	NA	NA	NA	NA
ASV_1126	Bacteria	NA	NA	NA	NA	NA	NA
ASV_1128	Bacteria	Acidobacteriota	Acidobacteriae	Acidobacteriales	Acidobacteriaceae (Subgroup 1)	Granulicella	NA
ASV_1131	Bacteria	Proteobacteria	Alphaproteobacteria	Reyranellales	Reyranellaceae	Reyranella	NA
ASV_1132	Bacteria	Chloroflexi	Ktedonobacteria	Ktedonobacterales	Ktedonobacteraceae	HSB OF53-F07	NA
ASV_1133	Bacteria	Planctomycetota	Phycisphaerae	NA	NA	NA	NA
ASV_1134	Bacteria	Chloroflexi	AD3	NA	NA	NA	NA
ASV_1135	Bacteria	Chloroflexi	AD3	NA	NA	NA	NA
ASV_1136	Bacteria	Proteobacteria	Alphaproteobacteria	Rickettsiales	SM2D12	NA	NA
ASV_1137	Bacteria	Proteobacteria	Gammaproteobacteria	Salinisphaerales	Solimonadaceae	Nevskia	NA
ASV_1141	Bacteria	Bacteroidota	Bacteroidia	Chitinophagales	Chitinophagaceae	Puia	NA
ASV_1142	Bacteria	Chloroflexi	AD3	NA	NA	NA	NA
ASV_1143	Bacteria	Bacteroidota	Bacteroidia	Sphingobacteriales	Sphingobacteriaceae	Mucilaginibacter	NA
ASV_1144	Bacteria	Proteobacteria	Gammaproteobacteria	Diplorickettsiales	Diplorickettsiaceae	Aquicella	NA
ASV_1145	Bacteria	Proteobacteria	Alphaproteobacteria	Acetobacterales	Acetobacteraceae	NA	NA
ASV_1146	Bacteria	Actinobacteriota	Thermoleophilia	Solirubrobacterales	Solirubrobacteraceae	NA	NA
ASV_1149	Bacteria	Proteobacteria	Alphaproteobacteria	Rhizobiales	Hyphomicrobiaceae	Hyphomicrobium	NA
ASV_1150	Bacteria	Proteobacteria	Gammaproteobacteria	Burkholderiales	NA	NA	NA
ASV_1151	Bacteria	Verrucomicrobiota	Verrucomicrobiae	Pedosphaerales	Pedosphaeraceae	NA	NA
ASV_1152	Bacteria	NA	NA	NA	NA	NA	NA
ASV_1153	Bacteria	NA	NA	NA	NA	NA	NA
ASV_1154	Bacteria	Cyanobacteria	Cyanobacteriia	Chloroplast	NA	NA	NA
ASV_1156	Bacteria	Actinobacteriota	Thermoleophilia	Solirubrobacterales	Solirubrobacteraceae	NA	NA
ASV_1157	Bacteria	NA	NA	NA	NA	NA	NA
ASV_1159	Bacteria	Myxococcota	Polyangia	Polyangiales	Polyangiaceae	Pajaroellobacter	NA
ASV_1160	Bacteria	Acidobacteriota	Acidobacteriae	Acidobacteriales	Koribacteraceae	Candidatus Koribacter	NA
ASV_1161	Bacteria	Bacteroidota	Bacteroidia	Chitinophagales	Chitinophagaceae	Puia	NA
ASV_1163	Bacteria	Actinobacteriota	Actinobacteria	Micrococcales	Microbacteriaceae	NA	NA
ASV_1164	Bacteria	Acidobacteriota	Vicinamibacteria	Vicinamibacterales	Vicinamibacteraceae	NA	NA
ASV_1165	Bacteria	Proteobacteria	Alphaproteobacteria	Acetobacterales	Acetobacteraceae	NA	NA
ASV_1167	Bacteria	Proteobacteria	Alphaproteobacteria	Acetobacterales	Acetobacteraceae	NA	NA
ASV_1168	Bacteria	Acidobacteriota	Acidobacteriae	Solibacterales	Solibacteraceae	Candidatus Solibacter	NA
ASV_1169	Bacteria	Chloroflexi	Ktedonobacteria	Ktedonobacterales	Ktedonobacteraceae	FCPS473	NA
ASV_1170	Bacteria	NA	NA	NA	NA	NA	NA
ASV_1171	Bacteria	GAL15	NA	NA	NA	NA	NA
ASV_1172	Bacteria	Proteobacteria	Gammaproteobacteria	Gammaproteobacteria Incertae Sedis	Unknown Family_4	Acidibacter	NA
ASV_1173	Bacteria	Acidobacteriota	Acidobacteriae	Acidobacteriales	Acidobacteriaceae (Subgroup 1)	Granulicella	NA
ASV_1174	Archaea	Crenarchaeota	Nitrososphaeria	NA	NA	NA	NA
ASV_1175	Bacteria	NA	NA	NA	NA	NA	NA
ASV_1176	Bacteria	Acidobacteriota	Acidobacteriae	Bryobacterales	Bryobacteraceae	Bryobacter	NA
ASV_1177	Bacteria	Acidobacteriota	Acidobacteriae	Acidobacteriales	Koribacteraceae	Candidatus Koribacter	NA
ASV_1178	Bacteria	Chloroflexi	Ktedonobacteria	Ktedonobacterales	JG30-KF-AS9	NA	NA
ASV_1179	Bacteria	Bacteroidota	Bacteroidia	Chitinophagales	Chitinophagaceae	NA	NA
ASV_1181	Bacteria	NA	NA	NA	NA	NA	NA
ASV_1182	Bacteria	Actinobacteriota	Actinobacteria	Frankiales	Acidothermaceae	Acidothermus	NA
ASV_1183	Bacteria	Chloroflexi	Ktedonobacteria	Ktedonobacterales	Ktedonobacteraceae	Thermosporothrix	NA
ASV_1184	Bacteria	Myxococcota	Polyangia	Polyangiales	Polyangiaceae	Pajaroellobacter	NA
ASV_1185	Bacteria	Planctomycetota	Phycisphaerae	Tepidisphaerales	WD2101 soil group	NA	NA
ASV_1186	Bacteria	Acidobacteriota	Acidobacteriae	Bryobacterales	Bryobacteraceae	Bryobacter	NA
ASV_1188	Bacteria	Proteobacteria	Alphaproteobacteria	Caulobacterales	Caulobacteraceae	Phenylobacterium	NA
ASV_1189	Bacteria	NA	NA	NA	NA	NA	NA
ASV_1190	Bacteria	Bacteroidota	Bacteroidia	Sphingobacteriales	Sphingobacteriaceae	Mucilaginibacter	NA
ASV_1193	Bacteria	NA	NA	NA	NA	NA	NA
ASV_1195	Bacteria	Planctomycetota	Phycisphaerae	Tepidisphaerales	WD2101 soil group	NA	NA
ASV_1196	Bacteria	Bacteroidota	Bacteroidia	Chitinophagales	Chitinophagaceae	Edaphobaculum	NA
ASV_1197	Bacteria	Acidobacteriota	Acidobacteriae	Acidobacteriales	Acidobacteriaceae (Subgroup 1)	Bryocella	NA
ASV_1199	Bacteria	Bacteroidota	Bacteroidia	Chitinophagales	Chitinophagaceae	Dinghuibacter	NA
ASV_1200	Bacteria	Acidobacteriota	Acidobacteriae	Acidobacteriales	Acidobacteriaceae (Subgroup 1)	NA	NA
ASV_1201	Bacteria	Acidobacteriota	Acidobacteriae	Acidobacteriales	Acidobacteriaceae (Subgroup 1)	Granulicella	NA
ASV_1204	Bacteria	NA	NA	NA	NA	NA	NA
ASV_1205	Bacteria	Bdellovibrionota	Oligoflexia	0319-6G20	NA	NA	NA
ASV_1206	Bacteria	Actinobacteriota	Thermoleophilia	Solirubrobacterales	Solirubrobacteraceae	Conexibacter	NA
ASV_1207	Bacteria	Planctomycetota	Phycisphaerae	Tepidisphaerales	WD2101 soil group	NA	NA
ASV_1211	Bacteria	Proteobacteria	Alphaproteobacteria	Micropepsales	Micropepsaceae	NA	NA
ASV_1212	Bacteria	Elusimicrobiota	Lineage IIa	NA	NA	NA	NA
ASV_1214	Bacteria	Patescibacteria	Saccharimonadia	Saccharimonadales	NA	NA	NA
ASV_1215	Bacteria	RCP2-54	NA	NA	NA	NA	NA
ASV_1216	Bacteria	Acidobacteriota	Acidobacteriae	Acidobacteriales	Koribacteraceae	Candidatus Koribacter	NA
ASV_1218	Archaea	Crenarchaeota	Nitrososphaeria	NA	NA	NA	NA
ASV_1220	Bacteria	Acidobacteriota	Blastocatellia	NA	NA	NA	NA
ASV_1221	Bacteria	Proteobacteria	Alphaproteobacteria	Rickettsiales	SM2D12	NA	NA
ASV_1222	Bacteria	Verrucomicrobiota	Chlamydiae	Chlamydiales	Parachlamydiaceae	NA	NA
ASV_1225	Bacteria	Chloroflexi	AD3	NA	NA	NA	NA
ASV_1228	Bacteria	Planctomycetota	Planctomycetes	Planctomycetales	Schlesneriaceae	Schlesneria	NA
ASV_1229	Bacteria	Verrucomicrobiota	Verrucomicrobiae	Pedosphaerales	Pedosphaeraceae	Ellin516	NA
ASV_1232	Bacteria	NA	NA	NA	NA	NA	NA
ASV_1234	Bacteria	Acidobacteriota	Acidobacteriae	Solibacterales	Solibacteraceae	Candidatus Solibacter	NA
ASV_1236	Bacteria	Armatimonadota	Chthonomonadetes	Chthonomonadales	Chthonomonadaceae	Chthonomonas	NA
ASV_1239	Bacteria	NA	NA	NA	NA	NA	NA
ASV_1240	Bacteria	Myxococcota	Polyangia	Polyangiales	Polyangiaceae	NA	NA
ASV_1241	Bacteria	Acidobacteriota	Acidobacteriae	Acidobacteriales	NA	NA	NA
ASV_1242	Bacteria	Acidobacteriota	Acidobacteriae	Solibacterales	Solibacteraceae	Candidatus Solibacter	NA
ASV_1243	Bacteria	Proteobacteria	Gammaproteobacteria	Acidithiobacillales	Acidithiobacillaceae	RCP1-48	NA
ASV_1245	Bacteria	Acidobacteriota	Acidobacteriae	Acidobacteriales	Acidobacteriaceae (Subgroup 1)	Granulicella	NA
ASV_1247	Bacteria	Planctomycetota	Planctomycetes	Isosphaerales	Isosphaeraceae	Aquisphaera	NA
ASV_1248	Bacteria	Actinobacteriota	Actinobacteria	Frankiales	Acidothermaceae	Acidothermus	NA
ASV_1249	Bacteria	Chloroflexi	NA	NA	NA	NA	NA
ASV_1250	Bacteria	Proteobacteria	Alphaproteobacteria	Acetobacterales	Acetobacteraceae	NA	NA
ASV_1251	Bacteria	Bdellovibrionota	Oligoflexia	0319-6G20	NA	NA	NA
ASV_1252	Bacteria	NA	NA	NA	NA	NA	NA
ASV_1253	Bacteria	NA	NA	NA	NA	NA	NA
ASV_1254	Bacteria	Actinobacteriota	Actinobacteria	Frankiales	Acidothermaceae	Acidothermus	NA
ASV_1255	Bacteria	Acidobacteriota	Acidobacteriae	Subgroup 2	NA	NA	NA
ASV_1256	Bacteria	Planctomycetota	Planctomycetes	Isosphaerales	Isosphaeraceae	Tundrisphaera	NA
ASV_1257	Bacteria	Bacteroidota	Bacteroidia	Sphingobacteriales	Sphingobacteriaceae	Mucilaginibacter	NA
ASV_1258	Bacteria	Dependentiae	Babeliae	Babeliales	UBA12409	NA	NA
ASV_1260	Bacteria	Planctomycetota	Planctomycetes	Pirellulales	Pirellulaceae	NA	NA
ASV_1261	Bacteria	Acidobacteriota	Acidobacteriae	Acidobacteriales	Koribacteraceae	Candidatus Koribacter	NA
ASV_1263	Bacteria	Bdellovibrionota	Oligoflexia	0319-6G20	NA	NA	NA
ASV_1264	Bacteria	Bacteroidota	Kapabacteria	Kapabacteriales	NA	NA	NA
ASV_1265	Bacteria	Acidobacteriota	Acidobacteriae	NA	NA	NA	NA
ASV_1266	Bacteria	Acidobacteriota	Acidobacteriae	Acidobacteriales	Acidobacteriaceae (Subgroup 1)	Acidipila	NA
ASV_1270	Bacteria	NA	NA	NA	NA	NA	NA
ASV_1271	Bacteria	Planctomycetota	Planctomycetes	Pirellulales	Pirellulaceae	NA	NA
ASV_1273	Bacteria	Bacteroidota	Bacteroidia	Chitinophagales	Chitinophagaceae	Puia	NA
ASV_1274	Bacteria	Acidobacteriota	Acidobacteriae	Subgroup 2	NA	NA	NA
ASV_1276	Bacteria	Verrucomicrobiota	Verrucomicrobiae	Pedosphaerales	Pedosphaeraceae	ADurb.Bin063-1	NA
ASV_1277	Bacteria	Acidobacteriota	Acidobacteriae	Subgroup 2	NA	NA	NA
ASV_1279	Bacteria	Verrucomicrobiota	Verrucomicrobiae	Chthoniobacterales	Xiphinematobacteraceae	Candidatus Xiphinematobacter	NA
ASV_1281	Bacteria	Chloroflexi	AD3	NA	NA	NA	NA
ASV_1282	Bacteria	Proteobacteria	Alphaproteobacteria	Caulobacterales	Caulobacteraceae	NA	NA
ASV_1283	Bacteria	Proteobacteria	Alphaproteobacteria	NA	NA	NA	NA
ASV_1284	Bacteria	Acidobacteriota	Acidobacteriae	Solibacterales	Solibacteraceae	Candidatus Solibacter	NA
ASV_1285	Bacteria	Proteobacteria	Gammaproteobacteria	WD260	NA	NA	NA
ASV_1286	Bacteria	Proteobacteria	Gammaproteobacteria	Burkholderiales	Burkholderiaceae	Burkholderia-Caballeronia-Paraburkholderia	NA
ASV_1287	Bacteria	Proteobacteria	Alphaproteobacteria	Rhizobiales	Xanthobacteraceae	NA	NA
ASV_1289	Bacteria	Acidobacteriota	Acidobacteriae	Acidobacteriales	Acidobacteriaceae (Subgroup 1)	NA	NA
ASV_1291	Bacteria	Acidobacteriota	Acidobacteriae	Acidobacteriales	Acidobacteriaceae (Subgroup 1)	Acidicapsa	NA
ASV_1292	Bacteria	Proteobacteria	Alphaproteobacteria	NA	NA	NA	NA
ASV_1293	Bacteria	Bacteroidota	Bacteroidia	Sphingobacteriales	Sphingobacteriaceae	NA	NA
ASV_1294	Bacteria	Acidobacteriota	Acidobacteriae	Subgroup 2	NA	NA	NA
ASV_1295	Bacteria	Proteobacteria	Alphaproteobacteria	Rhizobiales	NA	NA	NA
ASV_1296	Bacteria	Planctomycetota	Phycisphaerae	Tepidisphaerales	WD2101 soil group	NA	NA
ASV_1297	Bacteria	Acidobacteriota	Acidobacteriae	Subgroup 2	NA	NA	NA
ASV_1299	Bacteria	Proteobacteria	Gammaproteobacteria	Xanthomonadales	Rhodanobacteraceae	Dyella	NA
ASV_1300	Bacteria	Proteobacteria	Alphaproteobacteria	Acetobacterales	Acetobacteraceae	NA	NA
ASV_1301	Bacteria	Acidobacteriota	Acidobacteriae	Acidobacteriales	Acidobacteriaceae (Subgroup 1)	Occallatibacter	NA
ASV_1306	Bacteria	Acidobacteriota	Blastocatellia	NA	NA	NA	NA
ASV_1307	Bacteria	Bdellovibrionota	Oligoflexia	0319-6G20	NA	NA	NA
ASV_1308	Bacteria	Chloroflexi	Ktedonobacteria	Ktedonobacterales	Ktedonobacteraceae	NA	NA
ASV_1309	Bacteria	Myxococcota	Polyangia	Polyangiales	Polyangiaceae	Pajaroellobacter	NA
ASV_1312	Bacteria	Acidobacteriota	Acidobacteriae	Solibacterales	Solibacteraceae	Candidatus Solibacter	NA
ASV_1313	Bacteria	NA	NA	NA	NA	NA	NA
ASV_1314	Bacteria	Actinobacteriota	Actinobacteria	Pseudonocardiales	Pseudonocardiaceae	NA	NA
ASV_1316	Bacteria	Actinobacteriota	Actinobacteria	Catenulisporales	Catenulisporaceae	Catenulispora	NA
ASV_1317	Bacteria	Acidobacteriota	Acidobacteriae	Acidobacteriales	Koribacteraceae	Candidatus Koribacter	NA
ASV_1318	Bacteria	Proteobacteria	Alphaproteobacteria	Rickettsiales	SM2D12	NA	NA
ASV_1319	Bacteria	Acidobacteriota	Acidobacteriae	Subgroup 2	NA	NA	NA
ASV_1320	Bacteria	Proteobacteria	Gammaproteobacteria	Burkholderiales	A21b	NA	NA
ASV_1321	Bacteria	Acidobacteriota	Acidobacteriae	Bryobacterales	Bryobacteraceae	Bryobacter	NA
ASV_1322	Bacteria	Proteobacteria	Alphaproteobacteria	NA	NA	NA	NA
ASV_1323	Bacteria	NA	NA	NA	NA	NA	NA
ASV_1324	Bacteria	Proteobacteria	Alphaproteobacteria	Reyranellales	Reyranellaceae	Reyranella	NA
ASV_1325	Bacteria	NA	NA	NA	NA	NA	NA
ASV_1326	Bacteria	Chloroflexi	TK10	NA	NA	NA	NA
ASV_1327	Bacteria	Acidobacteriota	Acidobacteriae	Subgroup 2	NA	NA	NA
ASV_1328	Bacteria	Verrucomicrobiota	Chlamydiae	Chlamydiales	cvE6	NA	NA
ASV_1329	Bacteria	Acidobacteriota	Acidobacteriae	Solibacterales	Solibacteraceae	Candidatus Solibacter	NA
ASV_1331	Bacteria	Acidobacteriota	Acidobacteriae	Subgroup 2	NA	NA	NA
ASV_1332	Bacteria	Planctomycetota	Phycisphaerae	Tepidisphaerales	CPla-3 termite group	NA	NA
ASV_1333	Bacteria	Acidobacteriota	NA	NA	NA	NA	NA
ASV_1334	Bacteria	Cyanobacteria	Cyanobacteriia	NA	NA	NA	NA
ASV_1335	Bacteria	Proteobacteria	Alphaproteobacteria	Acetobacterales	Acetobacteraceae	NA	NA
ASV_1336	Bacteria	WPS-2	NA	NA	NA	NA	NA
ASV_1338	Bacteria	Proteobacteria	Alphaproteobacteria	Caulobacterales	Caulobacteraceae	Phenylobacterium	NA
ASV_1339	Bacteria	Proteobacteria	Alphaproteobacteria	Sphingomonadales	Sphingomonadaceae	Novosphingobium	NA
ASV_1340	Bacteria	Acidobacteriota	Acidobacteriae	Solibacterales	Solibacteraceae	Candidatus Solibacter	NA
ASV_1341	Bacteria	Acidobacteriota	Acidobacteriae	Acidobacteriales	Koribacteraceae	Candidatus Koribacter	NA
ASV_1342	Archaea	Micrarchaeota	Micrarchaeia	Micrarchaeales	NA	Candidatus Micrarchaeum	NA
ASV_1343	Bacteria	Proteobacteria	Alphaproteobacteria	NA	NA	NA	NA
ASV_1344	Bacteria	Planctomycetota	Phycisphaerae	Tepidisphaerales	WD2101 soil group	NA	NA
ASV_1345	Bacteria	NA	NA	NA	NA	NA	NA
ASV_1346	Bacteria	NA	NA	NA	NA	NA	NA
ASV_1348	Bacteria	Acidobacteriota	Acidobacteriae	Solibacterales	Solibacteraceae	Candidatus Solibacter	NA
ASV_1352	Bacteria	NA	NA	NA	NA	NA	NA
ASV_1353	Bacteria	Chloroflexi	Ktedonobacteria	Ktedonobacterales	Ktedonobacteraceae	G12-WMSP1	NA
ASV_1354	Bacteria	Verrucomicrobiota	Verrucomicrobiae	Chthoniobacterales	Xiphinematobacteraceae	Candidatus Xiphinematobacter	NA
ASV_1355	Bacteria	Acidobacteriota	Acidobacteriae	NA	NA	NA	NA
ASV_1356	Bacteria	Acidobacteriota	Acidobacteriae	Acidobacteriales	NA	NA	NA
ASV_1358	Bacteria	Actinobacteriota	Thermoleophilia	Solirubrobacterales	Solirubrobacteraceae	NA	NA
ASV_1359	Bacteria	Bdellovibrionota	Bdellovibrionia	Bdellovibrionales	Bdellovibrionaceae	Bdellovibrio	NA
ASV_1360	Bacteria	Bdellovibrionota	Bdellovibrionia	Bdellovibrionales	Bdellovibrionaceae	Bdellovibrio	NA
ASV_1362	Bacteria	Acidobacteriota	Acidobacteriae	Subgroup 12	NA	NA	NA
ASV_1364	Bacteria	Armatimonadota	Chthonomonadetes	Chthonomonadales	Chthonomonadaceae	Chthonomonas	NA
ASV_1365	Bacteria	Acidobacteriota	Acidobacteriae	Acidobacteriales	Acidobacteriaceae (Subgroup 1)	Acidipila	NA
ASV_1366	Bacteria	NA	NA	NA	NA	NA	NA
ASV_1367	Bacteria	Elusimicrobiota	Lineage IIa	NA	NA	NA	NA
ASV_1368	Bacteria	Bacteroidota	Bacteroidia	Sphingobacteriales	Sphingobacteriaceae	NA	NA
ASV_1369	Bacteria	Proteobacteria	Gammaproteobacteria	Burkholderiales	Rhodocyclaceae	NA	NA
ASV_1370	Bacteria	Planctomycetota	Phycisphaerae	Tepidisphaerales	WD2101 soil group	NA	NA
ASV_1371	Bacteria	Proteobacteria	Alphaproteobacteria	Rhizobiales	NA	NA	NA
ASV_1372	Bacteria	NA	NA	NA	NA	NA	NA
ASV_1373	Bacteria	Proteobacteria	Gammaproteobacteria	KF-JG30-C25	NA	NA	NA
ASV_1374	Bacteria	Acidobacteriota	Acidobacteriae	Acidobacteriales	Acidobacteriaceae (Subgroup 1)	Granulicella	NA
ASV_1375	Bacteria	Acidobacteriota	Acidobacteriae	NA	NA	NA	NA
ASV_1376	Bacteria	Planctomycetota	BD7-11	NA	NA	NA	NA
ASV_1377	Bacteria	NA	NA	NA	NA	NA	NA
ASV_1379	Bacteria	Proteobacteria	Gammaproteobacteria	Gammaproteobacteria Incertae Sedis	Unknown Family_4	Candidatus Ovatusbacter	NA
ASV_1381	Bacteria	Acidobacteriota	Acidobacteriae	Acidobacteriales	NA	NA	NA
ASV_1383	Bacteria	Verrucomicrobiota	Chlamydiae	Chlamydiales	cvE6	NA	NA
ASV_1384	Bacteria	Dependentiae	Babeliae	Babeliales	Vermiphilaceae	NA	NA
ASV_1385	Bacteria	Bacteroidota	Bacteroidia	Sphingobacteriales	CWT CU03-E12	NA	NA
ASV_1386	Bacteria	Cyanobacteria	Cyanobacteriia	Chloroplast	NA	NA	NA
ASV_1387	Bacteria	Proteobacteria	Gammaproteobacteria	Diplorickettsiales	Diplorickettsiaceae	Aquicella	NA
ASV_1389	Bacteria	WPS-2	NA	NA	NA	NA	NA
ASV_1390	Bacteria	NA	NA	NA	NA	NA	NA
ASV_1391	Bacteria	Verrucomicrobiota	Verrucomicrobiae	Chthoniobacterales	Chthoniobacteraceae	LD29	NA
ASV_1392	Bacteria	Proteobacteria	Alphaproteobacteria	NA	NA	NA	NA
ASV_1393	Bacteria	Proteobacteria	Alphaproteobacteria	Rhizobiales	NA	NA	NA
ASV_1394	Bacteria	Elusimicrobiota	Lineage IIa	NA	NA	NA	NA
ASV_1396	Bacteria	Acidobacteriota	Blastocatellia	Pyrinomonadales	Pyrinomonadaceae	NA	NA
ASV_1399	Bacteria	Acidobacteriota	Acidobacteriae	Acidobacteriales	Acidobacteriaceae (Subgroup 1)	NA	NA
ASV_1400	Bacteria	Myxococcota	Polyangia	Polyangiales	Polyangiaceae	Pajaroellobacter	NA
ASV_1401	Bacteria	Acidobacteriota	Acidobacteriae	Subgroup 2	NA	NA	NA
ASV_1402	Bacteria	Acidobacteriota	Acidobacteriae	Acidobacteriales	Acidobacteriaceae (Subgroup 1)	NA	NA
ASV_1403	Bacteria	Acidobacteriota	Acidobacteriae	Acidobacteriales	Koribacteraceae	Candidatus Koribacter	NA
ASV_1404	Bacteria	Acidobacteriota	Acidobacteriae	Subgroup 2	NA	NA	NA
ASV_1405	Bacteria	Proteobacteria	Alphaproteobacteria	Rhizobiales	Xanthobacteraceae	NA	NA
ASV_1406	Bacteria	NA	NA	NA	NA	NA	NA
ASV_1408	Bacteria	Chloroflexi	Ktedonobacteria	Ktedonobacterales	Ktedonobacteraceae	HSB OF53-F07	NA
ASV_1410	Bacteria	Desulfobacterota	Desulfobacteria	Desulfobacterales	Desulfosarcinaceae	NA	NA
ASV_1411	Bacteria	Acidobacteriota	Acidobacteriae	NA	NA	NA	NA
ASV_1412	Bacteria	Acidobacteriota	Acidobacteriae	Acidobacteriales	Koribacteraceae	Candidatus Koribacter	NA
ASV_1414	Bacteria	RCP2-54	NA	NA	NA	NA	NA
ASV_1417	Bacteria	NA	NA	NA	NA	NA	NA
ASV_1418	Bacteria	Acidobacteriota	Acidobacteriae	Acidobacteriales	NA	NA	NA
ASV_1419	Bacteria	Myxococcota	Polyangia	NA	NA	NA	NA
ASV_1420	Bacteria	NA	NA	NA	NA	NA	NA
ASV_1421	Bacteria	Chloroflexi	AD3	NA	NA	NA	NA
ASV_1423	Bacteria	Acidobacteriota	Acidobacteriae	Solibacterales	Solibacteraceae	Candidatus Solibacter	NA
ASV_1424	Bacteria	Bdellovibrionota	Bdellovibrionia	Bdellovibrionales	Bdellovibrionaceae	Bdellovibrio	NA
ASV_1426	Bacteria	Acidobacteriota	Acidobacteriae	Solibacterales	Solibacteraceae	Candidatus Solibacter	NA
ASV_1427	Bacteria	WPS-2	NA	NA	NA	NA	NA
ASV_1428	Bacteria	NA	NA	NA	NA	NA	NA
ASV_1429	Bacteria	Acidobacteriota	Acidobacteriae	Subgroup 13	NA	NA	NA
ASV_1430	Bacteria	Bacteroidota	Bacteroidia	Chitinophagales	Chitinophagaceae	Puia	NA
ASV_1435	Bacteria	NA	NA	NA	NA	NA	NA
ASV_1437	Bacteria	Dependentiae	Babeliae	Babeliales	Vermiphilaceae	NA	NA
ASV_1439	Bacteria	Planctomycetota	Phycisphaerae	Tepidisphaerales	WD2101 soil group	NA	NA
ASV_1440	Bacteria	Bacteroidota	Bacteroidia	Cytophagales	Cytophagaceae	Sporocytophaga	NA
ASV_1441	Bacteria	Acidobacteriota	Acidobacteriae	NA	NA	NA	NA
ASV_1443	Bacteria	Bacteroidota	Bacteroidia	Chitinophagales	Chitinophagaceae	Puia	NA
ASV_1444	Bacteria	Chloroflexi	Ktedonobacteria	Ktedonobacterales	Ktedonobacteraceae	Thermosporothrix	NA
ASV_1446	Bacteria	Acidobacteriota	Acidobacteriae	Acidobacteriales	Acidobacteriaceae (Subgroup 1)	NA	NA
ASV_1447	Bacteria	Chloroflexi	Ktedonobacteria	Ktedonobacterales	Ktedonobacteraceae	NA	NA
ASV_1448	Bacteria	Acidobacteriota	Acidobacteriae	Solibacterales	Solibacteraceae	Candidatus Solibacter	NA
ASV_1450	Archaea	Crenarchaeota	Nitrososphaeria	NA	NA	NA	NA
ASV_1451	Bacteria	Proteobacteria	Alphaproteobacteria	Acetobacterales	Acetobacteraceae	NA	NA
ASV_1453	Bacteria	Proteobacteria	Alphaproteobacteria	NA	NA	NA	NA
ASV_1457	Bacteria	Bacteroidota	Bacteroidia	Sphingobacteriales	Sphingobacteriaceae	Mucilaginibacter	NA
ASV_1458	Bacteria	Acidobacteriota	Acidobacteriae	Solibacterales	Solibacteraceae	Candidatus Solibacter	NA
ASV_1459	Bacteria	Acidobacteriota	Acidobacteriae	Acidobacteriales	Acidobacteriaceae (Subgroup 1)	Granulicella	NA
ASV_1461	Bacteria	Proteobacteria	Alphaproteobacteria	NA	NA	NA	NA
ASV_1462	Bacteria	Verrucomicrobiota	Verrucomicrobiae	S-BQ2-57 soil group	NA	NA	NA
ASV_1463	Bacteria	Bacteroidota	Bacteroidia	Chitinophagales	Chitinophagaceae	NA	NA
ASV_1464	Bacteria	Planctomycetota	Phycisphaerae	NA	NA	NA	NA
ASV_1465	Bacteria	Acidobacteriota	Acidobacteriae	Bryobacterales	Bryobacteraceae	Bryobacter	NA
ASV_1466	Bacteria	Verrucomicrobiota	Verrucomicrobiae	Chthoniobacterales	Chthoniobacteraceae	NA	NA
ASV_1467	Bacteria	Acidobacteriota	Acidobacteriae	Bryobacterales	Bryobacteraceae	Bryobacter	NA
ASV_1468	Bacteria	Proteobacteria	Alphaproteobacteria	Rickettsiales	SM2D12	NA	NA
ASV_1469	Bacteria	Acidobacteriota	Acidobacteriae	Acidobacteriales	Acidobacteriaceae (Subgroup 1)	Acidipila	NA
ASV_1470	Bacteria	Actinobacteriota	Actinobacteria	Pseudonocardiales	Pseudonocardiaceae	NA	NA
ASV_1471	Bacteria	Proteobacteria	Alphaproteobacteria	Rhizobiales	Labraceae	Labrys	NA
ASV_1473	Bacteria	NA	NA	NA	NA	NA	NA
ASV_1474	Bacteria	Planctomycetota	Phycisphaerae	Tepidisphaerales	WD2101 soil group	NA	NA
ASV_1476	Bacteria	Acidobacteriota	Acidobacteriae	Acidobacteriales	Acidobacteriaceae (Subgroup 1)	Edaphobacter	NA
ASV_1477	Bacteria	Acidobacteriota	Acidobacteriae	Acidobacteriales	Acidobacteriaceae (Subgroup 1)	Edaphobacter	NA
ASV_1480	Bacteria	Actinobacteriota	Actinobacteria	Frankiales	Acidothermaceae	Acidothermus	NA
ASV_1483	Bacteria	Proteobacteria	Alphaproteobacteria	Rhizobiales	Rhizobiales Incertae Sedis	Bauldia	NA
ASV_1484	Bacteria	Proteobacteria	Alphaproteobacteria	Rhizobiales	NA	NA	NA
ASV_1485	Bacteria	Acidobacteriota	Acidobacteriae	Acidobacteriales	Acidobacteriaceae (Subgroup 1)	NA	NA
ASV_1486	Bacteria	Acidobacteriota	Acidobacteriae	Subgroup 13	NA	NA	NA
ASV_1487	Bacteria	Proteobacteria	Alphaproteobacteria	Rhizobiales	Beijerinckiaceae	1174-901-12	NA
ASV_1488	Bacteria	NA	NA	NA	NA	NA	NA
ASV_1489	Bacteria	Planctomycetota	Phycisphaerae	NA	NA	NA	NA
ASV_1491	Bacteria	Acidobacteriota	Acidobacteriae	Subgroup 2	NA	NA	NA
ASV_1493	Bacteria	Bacteroidota	Bacteroidia	NA	NA	NA	NA
ASV_1494	Bacteria	Acidobacteriota	Acidobacteriae	Acidobacteriales	Koribacteraceae	Candidatus Koribacter	NA
ASV_1496	Bacteria	Proteobacteria	Gammaproteobacteria	Diplorickettsiales	Diplorickettsiaceae	Aquicella	NA
ASV_1497	Bacteria	Planctomycetota	Planctomycetes	Pirellulales	Pirellulaceae	NA	NA
ASV_1498	Bacteria	WPS-2	NA	NA	NA	NA	NA
ASV_1500	Bacteria	RCP2-54	NA	NA	NA	NA	NA
ASV_1501	Bacteria	Acidobacteriota	Acidobacteriae	Acidobacteriales	Acidobacteriaceae (Subgroup 1)	Terriglobus	NA
ASV_1502	Bacteria	NA	NA	NA	NA	NA	NA
ASV_1504	Bacteria	Proteobacteria	Gammaproteobacteria	NA	NA	NA	NA
ASV_1505	Bacteria	Acidobacteriota	Acidobacteriae	Subgroup 15	NA	NA	NA
ASV_1506	Bacteria	Acidobacteriota	Acidobacteriae	NA	NA	NA	NA
ASV_1509	Bacteria	Proteobacteria	Alphaproteobacteria	Sphingomonadales	Sphingomonadaceae	Sphingomonas	NA
ASV_1511	Bacteria	Verrucomicrobiota	Chlamydiae	Chlamydiales	cvE6	NA	NA
ASV_1512	Bacteria	Actinobacteriota	Actinobacteria	Frankiales	Acidothermaceae	Acidothermus	NA
ASV_1513	Bacteria	Acidobacteriota	Acidobacteriae	NA	NA	NA	NA
ASV_1516	Bacteria	Acidobacteriota	Acidobacteriae	Acidobacteriales	Acidobacteriaceae (Subgroup 1)	Acidipila	NA
ASV_1520	Bacteria	Acidobacteriota	Subgroup 5	NA	NA	NA	NA
ASV_1521	Bacteria	Chloroflexi	AD3	NA	NA	NA	NA
ASV_1523	Bacteria	Actinobacteriota	Acidimicrobiia	IMCC26256	NA	NA	NA
ASV_1525	Bacteria	Chloroflexi	Ktedonobacteria	Ktedonobacterales	Ktedonobacteraceae	NA	NA
ASV_1526	Bacteria	Planctomycetota	Planctomycetes	Gemmatales	Gemmataceae	Gemmata	NA
ASV_1527	Bacteria	Proteobacteria	Alphaproteobacteria	Rhizobiales	Beijerinckiaceae	NA	NA
ASV_1528	Bacteria	Proteobacteria	Alphaproteobacteria	Sphingomonadales	Sphingomonadaceae	Sphingomonas	NA
ASV_1529	Bacteria	RCP2-54	NA	NA	NA	NA	NA
ASV_1530	Bacteria	Acidobacteriota	Acidobacteriae	Acidobacteriales	Acidobacteriaceae (Subgroup 1)	Occallatibacter	NA
ASV_1531	Bacteria	NA	NA	NA	NA	NA	NA
ASV_1534	Bacteria	WPS-2	NA	NA	NA	NA	NA
ASV_1537	Bacteria	NA	NA	NA	NA	NA	NA
ASV_1538	Bacteria	Bacteroidota	Bacteroidia	Chitinophagales	Chitinophagaceae	Edaphobaculum	NA
ASV_1539	Bacteria	Chloroflexi	TK10	NA	NA	NA	NA
ASV_1541	Archaea	Crenarchaeota	Nitrososphaeria	NA	NA	NA	NA
ASV_1542	Bacteria	Actinobacteriota	Acidimicrobiia	IMCC26256	NA	NA	NA
ASV_1543	Bacteria	Bdellovibrionota	Oligoflexia	0319-6G20	NA	NA	NA
ASV_1544	Bacteria	Bdellovibrionota	Oligoflexia	0319-6G20	NA	NA	NA
ASV_1548	Bacteria	Bdellovibrionota	Oligoflexia	0319-6G20	NA	NA	NA
ASV_1549	Bacteria	Bacteroidota	Bacteroidia	Sphingobacteriales	Sphingobacteriaceae	Mucilaginibacter	NA
ASV_1550	Bacteria	Proteobacteria	Alphaproteobacteria	Caulobacterales	Caulobacteraceae	NA	NA
ASV_1551	Bacteria	Acidobacteriota	Acidobacteriae	NA	NA	NA	NA
ASV_1552	Bacteria	Acidobacteriota	Acidobacteriae	Acidobacteriales	Acidobacteriaceae (Subgroup 1)	NA	NA
ASV_1553	Bacteria	NA	NA	NA	NA	NA	NA
ASV_1556	Bacteria	Verrucomicrobiota	Chlamydiae	Chlamydiales	Parachlamydiaceae	Neochlamydia	NA
ASV_1557	Bacteria	Verrucomicrobiota	Chlamydiae	Chlamydiales	NA	NA	NA
ASV_1558	Bacteria	Planctomycetota	Phycisphaerae	Tepidisphaerales	WD2101 soil group	NA	NA
ASV_1559	Bacteria	Chloroflexi	Ktedonobacteria	Ktedonobacterales	Ktedonobacteraceae	NA	NA
ASV_1560	Bacteria	Actinobacteriota	Thermoleophilia	Solirubrobacterales	Solirubrobacteraceae	Conexibacter	NA
ASV_1562	Bacteria	Verrucomicrobiota	Chlamydiae	Chlamydiales	Simkaniaceae	Ga0074140	NA
ASV_1563	Bacteria	NA	NA	NA	NA	NA	NA
ASV_1565	Bacteria	Actinobacteriota	Thermoleophilia	Solirubrobacterales	67-14	NA	NA
ASV_1566	Bacteria	Acidobacteriota	Acidobacteriae	Subgroup 2	NA	NA	NA
ASV_1567	Bacteria	WPS-2	NA	NA	NA	NA	NA
ASV_1570	Bacteria	Bacteroidota	Bacteroidia	Chitinophagales	37-13	NA	NA
ASV_1571	Bacteria	Verrucomicrobiota	Verrucomicrobiae	Opitutales	Opitutaceae	Opitutus	NA
ASV_1572	Bacteria	Proteobacteria	Alphaproteobacteria	Caulobacterales	Caulobacteraceae	Phenylobacterium	NA
ASV_1573	Bacteria	Bdellovibrionota	Oligoflexia	0319-6G20	NA	NA	NA
ASV_1576	Bacteria	WPS-2	NA	NA	NA	NA	NA
ASV_1577	Bacteria	Actinobacteriota	Actinobacteria	Catenulisporales	Actinospicaceae	Actinospica	NA
ASV_1578	Bacteria	Actinobacteriota	Acidimicrobiia	IMCC26256	NA	NA	NA
ASV_1579	Bacteria	Proteobacteria	Alphaproteobacteria	NA	NA	NA	NA
ASV_1581	Bacteria	Dependentiae	Babeliae	Babeliales	Vermiphilaceae	NA	NA
ASV_1582	Bacteria	GAL15	NA	NA	NA	NA	NA
ASV_1584	Bacteria	Bacteroidota	Bacteroidia	Chitinophagales	Chitinophagaceae	NA	NA
ASV_1585	Bacteria	Proteobacteria	Alphaproteobacteria	Acetobacterales	Acetobacteraceae	Acidisoma	NA
ASV_1586	Bacteria	Actinobacteriota	Actinobacteria	Frankiales	NA	NA	NA
ASV_1587	Bacteria	Bacteroidota	Bacteroidia	Chitinophagales	Chitinophagaceae	Puia	NA
ASV_1588	Bacteria	Actinobacteriota	Actinobacteria	Streptosporangiales	Thermomonosporaceae	Actinocorallia	NA
ASV_1589	Bacteria	Bdellovibrionota	Oligoflexia	0319-6G20	NA	NA	NA
ASV_1590	Bacteria	Acidobacteriota	Acidobacteriae	Acidobacteriales	Acidobacteriaceae (Subgroup 1)	Occallatibacter	NA
ASV_1591	Bacteria	Bacteroidota	Bacteroidia	Chitinophagales	Chitinophagaceae	Heliimonas	NA
ASV_1592	Bacteria	Proteobacteria	Alphaproteobacteria	Rhizobiales	Beijerinckiaceae	Methylovirgula	NA
ASV_1594	Bacteria	Planctomycetota	Phycisphaerae	Tepidisphaerales	WD2101 soil group	NA	NA
ASV_1595	Bacteria	Bdellovibrionota	Oligoflexia	0319-6G20	NA	NA	NA
ASV_1596	Bacteria	Bacteroidota	Bacteroidia	Sphingobacteriales	Sphingobacteriaceae	Mucilaginibacter	NA
ASV_1597	Bacteria	Acidobacteriota	Acidobacteriae	Subgroup 2	NA	NA	NA
ASV_1599	Bacteria	Chloroflexi	Ktedonobacteria	Ktedonobacterales	Ktedonobacteraceae	JG30a-KF-32	NA
ASV_1600	Bacteria	Dependentiae	Babeliae	Babeliales	Vermiphilaceae	NA	NA
ASV_1601	Bacteria	Planctomycetota	NA	NA	NA	NA	NA
ASV_1607	Bacteria	Actinobacteriota	Thermoleophilia	Solirubrobacterales	Solirubrobacteraceae	NA	NA
ASV_1608	Bacteria	Actinobacteriota	Actinobacteria	Frankiales	Acidothermaceae	Acidothermus	NA
ASV_1609	Bacteria	NA	NA	NA	NA	NA	NA
ASV_1610	Bacteria	Nitrospirota	Leptospirillia	Leptospirillales	Leptospirillaceae	Leptospirillum	NA
ASV_1611	Archaea	Thermoplasmatota	Thermoplasmata	BSLdp215	NA	NA	NA
ASV_1614	Bacteria	Dependentiae	Babeliae	Babeliales	NA	NA	NA
ASV_1615	Bacteria	Proteobacteria	Gammaproteobacteria	Diplorickettsiales	Diplorickettsiaceae	Aquicella	NA
ASV_1616	Bacteria	Firmicutes	Bacilli	Bacillales	Bacillaceae	Bacillus	NA
ASV_1617	Bacteria	Bacteroidota	Bacteroidia	Sphingobacteriales	Sphingobacteriaceae	Mucilaginibacter	NA
ASV_1619	Bacteria	Armatimonadota	Armatimonadia	Armatimonadales	Armatimonadaceae	Armatimonas	NA
ASV_1620	Bacteria	Bacteroidota	Bacteroidia	Flavobacteriales	Blattabacteriaceae	Candidatus Brownia	NA
ASV_1621	Bacteria	NA	NA	NA	NA	NA	NA
ASV_1622	Bacteria	NA	NA	NA	NA	NA	NA
ASV_1624	Bacteria	NA	NA	NA	NA	NA	NA
ASV_1626	Bacteria	Chloroflexi	Ktedonobacteria	Ktedonobacterales	Ktedonobacteraceae	1921-3	NA
ASV_1628	Bacteria	Dependentiae	Babeliae	Babeliales	UBA12409	NA	NA
ASV_1629	Bacteria	Proteobacteria	Alphaproteobacteria	Rickettsiales	Mitochondria	NA	NA
ASV_1630	Bacteria	Actinobacteriota	Actinobacteria	Catenulisporales	Actinospicaceae	Actinospica	NA
ASV_1632	Bacteria	Acidobacteriota	Acidobacteriae	Solibacterales	Solibacteraceae	Candidatus Solibacter	NA
ASV_1633	Bacteria	Acidobacteriota	Acidobacteriae	Acidobacteriales	Acidobacteriaceae (Subgroup 1)	Acidipila	NA
ASV_1634	Bacteria	Proteobacteria	Alphaproteobacteria	Rickettsiales	NA	Candidatus Jidaibacter	NA
ASV_1635	Bacteria	Chloroflexi	KD4-96	NA	NA	NA	NA
ASV_1637	Bacteria	NA	NA	NA	NA	NA	NA
ASV_1638	Bacteria	Bacteroidota	Bacteroidia	Chitinophagales	Chitinophagaceae	NA	NA
ASV_1639	Bacteria	Acidobacteriota	Blastocatellia	NA	NA	NA	NA
ASV_1640	Bacteria	Elusimicrobiota	Lineage IIb	NA	NA	NA	NA
ASV_1641	Bacteria	Acidobacteriota	Acidobacteriae	Bryobacterales	Bryobacteraceae	Bryobacter	NA
ASV_1643	Bacteria	Planctomycetota	Planctomycetes	Isosphaerales	Isosphaeraceae	Aquisphaera	NA
ASV_1644	Archaea	Crenarchaeota	Nitrososphaeria	NA	NA	NA	NA
ASV_1645	Bacteria	Patescibacteria	Saccharimonadia	Saccharimonadales	NA	NA	NA
ASV_1648	Bacteria	NA	NA	NA	NA	NA	NA
ASV_1650	Bacteria	NA	NA	NA	NA	NA	NA
ASV_1651	Bacteria	Proteobacteria	Gammaproteobacteria	Burkholderiales	Comamonadaceae	NA	NA
ASV_1653	Bacteria	Proteobacteria	Alphaproteobacteria	Rhizobiales	Beijerinckiaceae	NA	NA
ASV_1654	Bacteria	Dependentiae	Babeliae	Babeliales	NA	NA	NA
ASV_1655	Bacteria	Dependentiae	Babeliae	Babeliales	Vermiphilaceae	NA	NA
ASV_1658	Bacteria	Bdellovibrionota	Oligoflexia	0319-6G20	NA	NA	NA
ASV_1659	Bacteria	NA	NA	NA	NA	NA	NA
ASV_1661	Bacteria	Patescibacteria	Microgenomatia	Candidatus Woesebacteria	NA	NA	NA
ASV_1663	Bacteria	NA	NA	NA	NA	NA	NA
ASV_1664	Bacteria	Acidobacteriota	Acidobacteriae	Subgroup 2	NA	NA	NA
ASV_1665	Bacteria	Acidobacteriota	Acidobacteriae	NA	NA	NA	NA
ASV_1668	Bacteria	Actinobacteriota	Actinobacteria	NA	NA	NA	NA
ASV_1670	Bacteria	Chloroflexi	JG30-KF-CM66	NA	NA	NA	NA
ASV_1672	Bacteria	NA	NA	NA	NA	NA	NA
ASV_1673	Bacteria	Acidobacteriota	Subgroup 5	NA	NA	NA	NA
ASV_1674	Bacteria	FCPU426	NA	NA	NA	NA	NA
ASV_1677	Bacteria	Bacteroidota	Bacteroidia	Sphingobacteriales	Sphingobacteriaceae	NA	NA
ASV_1678	Bacteria	Chloroflexi	Ktedonobacteria	Ktedonobacterales	Ktedonobacteraceae	1959-1	NA
ASV_1681	Bacteria	Dependentiae	Babeliae	Babeliales	NA	NA	NA
ASV_1683	Bacteria	Myxococcota	Polyangia	Polyangiales	Polyangiaceae	Pajaroellobacter	NA
ASV_1686	Bacteria	Bacteroidota	Bacteroidia	Chitinophagales	Chitinophagaceae	Parafilimonas	NA
ASV_1688	Bacteria	Bdellovibrionota	Bdellovibrionia	Bdellovibrionales	Bdellovibrionaceae	Bdellovibrio	NA
ASV_1689	Bacteria	Proteobacteria	Alphaproteobacteria	NA	NA	NA	NA
ASV_1693	Bacteria	RCP2-54	NA	NA	NA	NA	NA
ASV_1694	Bacteria	Acidobacteriota	Acidobacteriae	Acidobacteriales	Acidobacteriaceae (Subgroup 1)	Granulicella	NA
ASV_1695	Bacteria	Proteobacteria	Gammaproteobacteria	Gammaproteobacteria Incertae Sedis	Unknown Family_4	Acidibacter	NA
ASV_1697	Bacteria	Cyanobacteria	Cyanobacteriia	Chloroplast	NA	NA	NA
ASV_1698	Bacteria	Bacteroidota	Bacteroidia	Chitinophagales	Chitinophagaceae	NA	NA
ASV_1699	Bacteria	Actinobacteriota	Thermoleophilia	Solirubrobacterales	Solirubrobacteraceae	Conexibacter	NA
ASV_1701	Bacteria	Dependentiae	Babeliae	Babeliales	NA	NA	NA
ASV_1702	Bacteria	Actinobacteriota	Actinobacteria	Pseudonocardiales	Pseudonocardiaceae	Actinomycetospora	NA
ASV_1703	Bacteria	Verrucomicrobiota	Chlamydiae	Chlamydiales	NA	NA	NA
ASV_1704	Bacteria	WPS-2	NA	NA	NA	NA	NA
ASV_1706	Bacteria	NA	NA	NA	NA	NA	NA
ASV_1707	Bacteria	Verrucomicrobiota	Chlamydiae	Chlamydiales	cvE6	NA	NA
ASV_1711	Bacteria	Verrucomicrobiota	Verrucomicrobiae	Chthoniobacterales	Chthoniobacteraceae	Candidatus Udaeobacter	NA
ASV_1712	Bacteria	Chloroflexi	Ktedonobacteria	Ktedonobacterales	Ktedonobacteraceae	FCPS473	NA
ASV_1714	Bacteria	NA	NA	NA	NA	NA	NA
ASV_1716	Bacteria	Acidobacteriota	Acidobacteriae	NA	NA	NA	NA
ASV_1717	Bacteria	Planctomycetota	Phycisphaerae	Tepidisphaerales	WD2101 soil group	NA	NA
ASV_1719	Bacteria	Chloroflexi	Ktedonobacteria	Ktedonobacterales	Ktedonobacteraceae	1921-2	NA
ASV_1720	Bacteria	Acidobacteriota	Acidobacteriae	NA	NA	NA	NA
ASV_1721	Bacteria	NA	NA	NA	NA	NA	NA
ASV_1723	Bacteria	Planctomycetota	Planctomycetes	Gemmatales	Gemmataceae	NA	NA
ASV_1725	Bacteria	Verrucomicrobiota	Verrucomicrobiae	Opitutales	Opitutaceae	NA	NA
ASV_1726	Bacteria	Verrucomicrobiota	Verrucomicrobiae	Opitutales	Opitutaceae	NA	NA
ASV_1728	Bacteria	NA	NA	NA	NA	NA	NA
ASV_1730	Bacteria	Acidobacteriota	Acidobacteriae	Acidobacteriales	Acidobacteriaceae (Subgroup 1)	NA	NA
ASV_1731	Bacteria	Proteobacteria	Alphaproteobacteria	Rhizobiales	Beijerinckiaceae	NA	NA
ASV_1732	Bacteria	NA	NA	NA	NA	NA	NA
ASV_1733	Bacteria	Actinobacteriota	Actinobacteria	Frankiales	Acidothermaceae	Acidothermus	NA
ASV_1735	Bacteria	Bacteroidota	Bacteroidia	Chitinophagales	Chitinophagaceae	NA	NA
ASV_1737	Bacteria	NA	NA	NA	NA	NA	NA
ASV_1738	Bacteria	Myxococcota	Polyangia	NA	NA	NA	NA
ASV_1739	Bacteria	Proteobacteria	Gammaproteobacteria	Burkholderiales	Burkholderiaceae	Limnobacter	NA
ASV_1740	Bacteria	Proteobacteria	Gammaproteobacteria	Burkholderiales	Oxalobacteraceae	[Aquaspirillum] arcticum group	NA
ASV_1741	Bacteria	Acidobacteriota	Acidobacteriae	Acidobacteriales	Acidobacteriaceae (Subgroup 1)	NA	NA
ASV_1742	Bacteria	Dependentiae	Babeliae	Babeliales	NA	NA	NA
ASV_1743	Bacteria	Planctomycetota	Phycisphaerae	Tepidisphaerales	WD2101 soil group	NA	NA
ASV_1744	Bacteria	Proteobacteria	Alphaproteobacteria	Caulobacterales	Caulobacteraceae	Phenylobacterium	NA
ASV_1746	Bacteria	Acidobacteriota	Acidobacteriae	Subgroup 2	NA	NA	NA
ASV_1747	Bacteria	Planctomycetota	BD7-11	NA	NA	NA	NA
ASV_1748	Bacteria	Bacteroidota	Bacteroidia	Chitinophagales	Chitinophagaceae	NA	NA
ASV_1749	Bacteria	Chloroflexi	Ktedonobacteria	Ktedonobacterales	Ktedonobacteraceae	NA	NA
ASV_1750	Bacteria	Acidobacteriota	Acidobacteriae	NA	NA	NA	NA
ASV_1751	Bacteria	Gemmatimonadota	Gemmatimonadetes	Gemmatimonadales	Gemmatimonadaceae	Roseisolibacter	NA
ASV_1752	Bacteria	Proteobacteria	Alphaproteobacteria	NA	NA	NA	NA
ASV_1755	Bacteria	Chloroflexi	Ktedonobacteria	Ktedonobacterales	JG30-KF-AS9	NA	NA
ASV_1756	Bacteria	Proteobacteria	Alphaproteobacteria	Rickettsiales	SM2D12	NA	NA
ASV_1757	Bacteria	Bacteroidota	Bacteroidia	Sphingobacteriales	Sphingobacteriaceae	NA	NA
ASV_1759	Bacteria	Elusimicrobiota	Lineage IIa	NA	NA	NA	NA
ASV_1760	Bacteria	Verrucomicrobiota	Verrucomicrobiae	Pedosphaerales	Pedosphaeraceae	NA	NA
ASV_1763	Bacteria	Proteobacteria	Gammaproteobacteria	NA	NA	NA	NA
ASV_1764	Bacteria	RCP2-54	NA	NA	NA	NA	NA
ASV_1766	Bacteria	NA	NA	NA	NA	NA	NA
ASV_1768	Bacteria	Chloroflexi	Ktedonobacteria	Ktedonobacterales	NA	NA	NA
ASV_1770	Bacteria	Planctomycetota	Phycisphaerae	NA	NA	NA	NA
ASV_1771	Bacteria	Acidobacteriota	Acidobacteriae	Acidobacteriales	NA	NA	NA
ASV_1772	Bacteria	Elusimicrobiota	Lineage IIa	NA	NA	NA	NA
ASV_1773	Bacteria	NA	NA	NA	NA	NA	NA
ASV_1775	Bacteria	Proteobacteria	Alphaproteobacteria	Caulobacterales	Caulobacteraceae	NA	NA
ASV_1776	Bacteria	Acidobacteriota	Acidobacteriae	Bryobacterales	Bryobacteraceae	Bryobacter	NA
ASV_1777	Bacteria	Planctomycetota	Phycisphaerae	Tepidisphaerales	WD2101 soil group	NA	NA
ASV_1779	Bacteria	Planctomycetota	Phycisphaerae	Tepidisphaerales	WD2101 soil group	NA	NA
ASV_1780	Bacteria	Bacteroidota	Bacteroidia	Chitinophagales	Chitinophagaceae	Parafilimonas	NA
ASV_1781	Bacteria	Cyanobacteria	Cyanobacteriia	Chloroplast	NA	NA	NA
ASV_1784	Bacteria	Bacteroidota	Bacteroidia	Bacteroidales	Bacteroidetes BD2-2	NA	NA
ASV_1785	Bacteria	Myxococcota	Polyangia	Polyangiales	Polyangiaceae	Pajaroellobacter	NA
ASV_1787	Bacteria	Planctomycetota	Phycisphaerae	Tepidisphaerales	WD2101 soil group	NA	NA
ASV_1788	Bacteria	Acidobacteriota	Acidobacteriae	Acidobacteriales	Acidobacteriaceae (Subgroup 1)	NA	NA
ASV_1789	Bacteria	Acidobacteriota	Acidobacteriae	Acidobacteriales	Acidobacteriaceae (Subgroup 1)	NA	NA
ASV_1790	Bacteria	NA	NA	NA	NA	NA	NA
ASV_1792	Bacteria	Planctomycetota	Planctomycetes	Isosphaerales	Isosphaeraceae	NA	NA
ASV_1793	Bacteria	Bdellovibrionota	Oligoflexia	0319-6G20	NA	NA	NA
ASV_1798	Bacteria	Proteobacteria	Alphaproteobacteria	Sphingomonadales	Sphingomonadaceae	NA	NA
ASV_1799	Bacteria	Acidobacteriota	NA	NA	NA	NA	NA
ASV_1800	Bacteria	Myxococcota	Myxococcia	Myxococcales	Myxococcaceae	P3OB-42	NA
ASV_1802	Bacteria	NA	NA	NA	NA	NA	NA
ASV_1803	Bacteria	Myxococcota	Polyangia	Polyangiales	Polyangiaceae	Pajaroellobacter	NA
ASV_1804	Bacteria	Acidobacteriota	Acidobacteriae	Bryobacterales	Bryobacteraceae	Bryobacter	NA
ASV_1806	Bacteria	Proteobacteria	NA	NA	NA	NA	NA
ASV_1807	Bacteria	Planctomycetota	Phycisphaerae	Tepidisphaerales	WD2101 soil group	NA	NA
ASV_1808	Bacteria	Acidobacteriota	Acidobacteriae	Subgroup 2	NA	NA	NA
ASV_1813	Bacteria	NA	NA	NA	NA	NA	NA
ASV_1814	Bacteria	Planctomycetota	Planctomycetes	Isosphaerales	Isosphaeraceae	NA	NA
ASV_1816	Bacteria	Armatimonadota	Chthonomonadetes	Chthonomonadales	Chthonomonadaceae	Chthonomonas	NA
ASV_1817	Bacteria	Chloroflexi	TK10	NA	NA	NA	NA
ASV_1818	Bacteria	Proteobacteria	NA	NA	NA	NA	NA
ASV_1819	Bacteria	Chloroflexi	Ktedonobacteria	Ktedonobacterales	Ktedonobacteraceae	FCPS473	NA
ASV_1820	Bacteria	Planctomycetota	Phycisphaerae	Tepidisphaerales	CPla-3 termite group	NA	NA
ASV_1821	Bacteria	Chloroflexi	Ktedonobacteria	Ktedonobacterales	Ktedonobacteraceae	1921-2	NA
ASV_1822	Bacteria	Dependentiae	Babeliae	Babeliales	NA	NA	NA
ASV_1824	Bacteria	Chloroflexi	Ktedonobacteria	Ktedonobacterales	Ktedonobacteraceae	G12-WMSP1	NA
ASV_1827	Bacteria	WPS-2	NA	NA	NA	NA	NA
ASV_1829	Bacteria	NA	NA	NA	NA	NA	NA
ASV_1831	Bacteria	Elusimicrobiota	Elusimicrobia	Lineage IV	NA	NA	NA
ASV_1834	Bacteria	Dependentiae	Babeliae	Babeliales	Vermiphilaceae	NA	NA
ASV_1835	Bacteria	Verrucomicrobiota	Verrucomicrobiae	NA	NA	NA	NA
ASV_1836	Bacteria	Acidobacteriota	Acidobacteriae	Solibacterales	Solibacteraceae	Candidatus Solibacter	NA
ASV_1837	Bacteria	Planctomycetota	Planctomycetes	Gemmatales	Gemmataceae	NA	NA
ASV_1840	Bacteria	WPS-2	NA	NA	NA	NA	NA
ASV_1843	Bacteria	Chloroflexi	AD3	NA	NA	NA	NA
ASV_1845	Bacteria	Myxococcota	Polyangia	Polyangiales	Polyangiaceae	Pajaroellobacter	NA
ASV_1846	Bacteria	Proteobacteria	Alphaproteobacteria	NA	NA	NA	NA
ASV_1847	Bacteria	Elusimicrobiota	Lineage IIa	NA	NA	NA	NA
ASV_1849	Bacteria	NA	NA	NA	NA	NA	NA
ASV_1850	Bacteria	Planctomycetota	Phycisphaerae	Tepidisphaerales	WD2101 soil group	NA	NA
ASV_1851	Bacteria	Verrucomicrobiota	Verrucomicrobiae	Pedosphaerales	Pedosphaeraceae	NA	NA
ASV_1852	Bacteria	NA	NA	NA	NA	NA	NA
ASV_1853	Bacteria	Chloroflexi	Ktedonobacteria	Ktedonobacterales	JG30-KF-AS9	NA	NA
ASV_1854	Bacteria	Acidobacteriota	Acidobacteriae	Subgroup 2	NA	NA	NA
ASV_1855	Bacteria	NA	NA	NA	NA	NA	NA
ASV_1858	Bacteria	Acidobacteriota	Acidobacteriae	Subgroup 13	NA	NA	NA
ASV_1859	Bacteria	Acidobacteriota	Acidobacteriae	NA	NA	NA	NA
ASV_1860	Bacteria	Actinobacteriota	Actinobacteria	NA	NA	NA	NA
ASV_1865	Bacteria	NA	NA	NA	NA	NA	NA
ASV_1866	Bacteria	Verrucomicrobiota	Verrucomicrobiae	Pedosphaerales	Pedosphaeraceae	Ellin516	NA
ASV_1868	Bacteria	NA	NA	NA	NA	NA	NA
ASV_1871	Bacteria	Dependentiae	Babeliae	Babeliales	NA	NA	NA
ASV_1872	Bacteria	Proteobacteria	Gammaproteobacteria	Xanthomonadales	Rhodanobacteraceae	Rhodanobacter	NA
ASV_1874	Bacteria	NA	NA	NA	NA	NA	NA
ASV_1876	Bacteria	Proteobacteria	Alphaproteobacteria	Acetobacterales	Acetobacteraceae	NA	NA
ASV_1877	Bacteria	NA	NA	NA	NA	NA	NA
ASV_1878	Bacteria	Proteobacteria	Gammaproteobacteria	NA	NA	NA	NA
ASV_1879	Bacteria	NA	NA	NA	NA	NA	NA
ASV_1880	Bacteria	Actinobacteriota	Actinobacteria	Streptosporangiales	Thermomonosporaceae	Actinomadura	NA
ASV_1882	Bacteria	Bacteroidota	Bacteroidia	Chitinophagales	37-13	NA	NA
ASV_1884	Bacteria	Proteobacteria	Gammaproteobacteria	NA	NA	NA	NA
ASV_1885	Bacteria	Verrucomicrobiota	Verrucomicrobiae	Pedosphaerales	Pedosphaeraceae	NA	NA
ASV_1889	Bacteria	Myxococcota	Myxococcia	Myxococcales	Anaeromyxobacteraceae	Anaeromyxobacter	NA
ASV_1890	Bacteria	Acidobacteriota	Acidobacteriae	Acidobacteriales	Acidobacteriaceae (Subgroup 1)	Granulicella	NA
ASV_1893	Bacteria	NA	NA	NA	NA	NA	NA
ASV_1895	Bacteria	Acidobacteriota	Acidobacteriae	NA	NA	NA	NA
ASV_1898	Bacteria	Elusimicrobiota	Elusimicrobia	Lineage IV	NA	NA	NA
ASV_1902	Bacteria	Actinobacteriota	Actinobacteria	Catenulisporales	Actinospicaceae	Actinospica	NA
ASV_1904	Bacteria	NA	NA	NA	NA	NA	NA
ASV_1907	Bacteria	Patescibacteria	Microgenomatia	Candidatus Daviesbacteria	NA	NA	NA
ASV_1910	Bacteria	NA	NA	NA	NA	NA	NA
ASV_1911	Bacteria	Myxococcota	Polyangia	Polyangiales	Polyangiaceae	Pajaroellobacter	NA
ASV_1913	Bacteria	Proteobacteria	Gammaproteobacteria	Xanthomonadales	Rhodanobacteraceae	Dokdonella	NA
ASV_1914	Bacteria	Acidobacteriota	Acidobacteriae	Acidobacteriales	NA	NA	NA
ASV_1915	Bacteria	Planctomycetota	vadinHA49	NA	NA	NA	NA
ASV_1917	Bacteria	Proteobacteria	Alphaproteobacteria	Sphingomonadales	Sphingomonadaceae	NA	NA
ASV_1918	Bacteria	Planctomycetota	NA	NA	NA	NA	NA
ASV_1920	Bacteria	Actinobacteriota	Actinobacteria	Micrococcales	Microbacteriaceae	NA	NA
ASV_1921	Bacteria	Dependentiae	Babeliae	Babeliales	NA	NA	NA
ASV_1922	Bacteria	Planctomycetota	Phycisphaerae	Tepidisphaerales	WD2101 soil group	NA	NA
ASV_1923	Bacteria	Proteobacteria	Alphaproteobacteria	Rickettsiales	Mitochondria	NA	NA
ASV_1924	Bacteria	Planctomycetota	Planctomycetes	Isosphaerales	Isosphaeraceae	NA	NA
ASV_1926	Bacteria	Planctomycetota	Planctomycetes	Isosphaerales	Isosphaeraceae	NA	NA
ASV_1927	Bacteria	Verrucomicrobiota	Chlamydiae	Chlamydiales	Parachlamydiaceae	NA	NA
ASV_1929	Bacteria	NA	NA	NA	NA	NA	NA
ASV_1930	Bacteria	Chloroflexi	Ktedonobacteria	Ktedonobacterales	Ktedonobacteraceae	1921-3	NA
ASV_1931	Bacteria	Acidobacteriota	Acidobacteriae	Acidobacteriales	Acidobacteriaceae (Subgroup 1)	NA	NA
ASV_1932	Bacteria	Proteobacteria	Alphaproteobacteria	NA	NA	NA	NA
ASV_1933	Bacteria	Acidobacteriota	Acidobacteriae	Acidobacteriales	Acidobacteriaceae (Subgroup 1)	Terriglobus	NA
ASV_1934	Bacteria	Proteobacteria	Gammaproteobacteria	Gammaproteobacteria Incertae Sedis	Unknown Family_4	Candidatus Berkiella	NA
ASV_1936	Bacteria	Verrucomicrobiota	Chlamydiae	Chlamydiales	NA	NA	NA
ASV_1937	Bacteria	NA	NA	NA	NA	NA	NA
ASV_1938	Bacteria	Myxococcota	Polyangia	Polyangiales	Polyangiaceae	Sorangium	NA
ASV_1939	Bacteria	NA	NA	NA	NA	NA	NA
ASV_1940	Bacteria	Myxococcota	Polyangia	Polyangiales	Phaselicystidaceae	Phaselicystis	NA
ASV_1943	Bacteria	Verrucomicrobiota	Verrucomicrobiae	Opitutales	Puniceicoccaceae	Verruc-01	NA
ASV_1945	Bacteria	Myxococcota	Polyangia	Haliangiales	Haliangiaceae	Haliangium	NA
ASV_1946	Bacteria	Verrucomicrobiota	Chlamydiae	Chlamydiales	NA	NA	NA
ASV_1947	Bacteria	Proteobacteria	Gammaproteobacteria	NA	NA	NA	NA
ASV_1949	Bacteria	Acidobacteriota	Vicinamibacteria	Vicinamibacterales	Vicinamibacteraceae	Luteitalea	NA
ASV_1950	Bacteria	Bacteroidota	Bacteroidia	Chitinophagales	Chitinophagaceae	NA	NA
ASV_1956	Bacteria	Proteobacteria	Alphaproteobacteria	Acetobacterales	Acetobacteraceae	Rhodopila	NA
ASV_1957	Bacteria	Actinobacteriota	Acidimicrobiia	IMCC26256	NA	NA	NA
ASV_1959	Bacteria	Firmicutes	Bacilli	Bacillales	NA	NA	NA
ASV_1960	Bacteria	Dependentiae	Babeliae	Babeliales	Vermiphilaceae	NA	NA
ASV_1961	Bacteria	Dependentiae	Babeliae	Babeliales	UBA12409	NA	NA
ASV_1962	Bacteria	Acidobacteriota	Acidobacteriae	Solibacterales	Solibacteraceae	Candidatus Solibacter	NA
ASV_1964	Bacteria	Dependentiae	Babeliae	Babeliales	NA	NA	NA
ASV_1966	Bacteria	Acidobacteriota	Acidobacteriae	NA	NA	NA	NA
ASV_1967	Bacteria	Acidobacteriota	Acidobacteriae	NA	NA	NA	NA
ASV_1968	Bacteria	Bacteroidota	SJA-28	NA	NA	NA	NA
ASV_1969	Bacteria	WPS-2	NA	NA	NA	NA	NA
ASV_1970	Bacteria	Proteobacteria	Gammaproteobacteria	NA	NA	NA	NA
ASV_1972	Bacteria	NA	NA	NA	NA	NA	NA
ASV_1973	Bacteria	Bacteroidota	Bacteroidia	Sphingobacteriales	Sphingobacteriaceae	Mucilaginibacter	NA
ASV_1974	Bacteria	Actinobacteriota	Actinobacteria	Frankiales	Acidothermaceae	Acidothermus	NA
ASV_1975	Bacteria	Verrucomicrobiota	Chlamydiae	Chlamydiales	Parachlamydiaceae	NA	NA
ASV_1976	Bacteria	Proteobacteria	Gammaproteobacteria	Pseudomonadales	Pseudomonadaceae	NA	NA
ASV_1977	Bacteria	Chloroflexi	Ktedonobacteria	Ktedonobacterales	Ktedonobacteraceae	NA	NA
ASV_1978	Bacteria	Bacteroidota	Bacteroidia	Chitinophagales	Chitinophagaceae	Flavisolibacter	NA
ASV_1986	Bacteria	Chloroflexi	Ktedonobacteria	Ktedonobacterales	JG30-KF-AS9	NA	NA
ASV_1987	Bacteria	NA	NA	NA	NA	NA	NA
ASV_1990	Bacteria	Myxococcota	Polyangia	Polyangiales	Polyangiaceae	Pajaroellobacter	NA
ASV_1991	Bacteria	Proteobacteria	Alphaproteobacteria	NA	NA	NA	NA
ASV_1993	Bacteria	Bacteroidota	Bacteroidia	Chitinophagales	Chitinophagaceae	NA	NA
ASV_1994	Bacteria	Proteobacteria	Alphaproteobacteria	Rhizobiales	Xanthobacteraceae	NA	NA
ASV_1996	Bacteria	Firmicutes	Bacilli	Erysipelotrichales	Erysipelotrichaceae	Turicibacter	NA
ASV_1998	Bacteria	NA	NA	NA	NA	NA	NA
ASV_2000	Bacteria	NA	NA	NA	NA	NA	NA
ASV_2001	Bacteria	Dependentiae	Babeliae	Babeliales	NA	NA	NA
ASV_2002	Bacteria	Acidobacteriota	Acidobacteriae	Subgroup 2	NA	NA	NA
ASV_2003	Bacteria	Acidobacteriota	Acidobacteriae	Bryobacterales	Bryobacteraceae	Bryobacter	NA
ASV_2004	Bacteria	Planctomycetota	Planctomycetes	NA	NA	NA	NA
ASV_2006	Bacteria	Proteobacteria	Alphaproteobacteria	NA	NA	NA	NA
ASV_2007	Bacteria	Proteobacteria	Gammaproteobacteria	KF-JG30-C25	NA	NA	NA
ASV_2008	Bacteria	Myxococcota	Polyangia	Blfdi19	NA	NA	NA
ASV_2009	Bacteria	NA	NA	NA	NA	NA	NA
ASV_2010	Bacteria	Bdellovibrionota	Bdellovibrionia	Bdellovibrionales	Bdellovibrionaceae	Bdellovibrio	NA
ASV_2012	Bacteria	Chloroflexi	Ktedonobacteria	Ktedonobacterales	Ktedonobacteraceae	FCPS473	NA
ASV_2013	Bacteria	NA	NA	NA	NA	NA	NA
ASV_2014	Bacteria	Chloroflexi	Ktedonobacteria	Ktedonobacterales	Ktedonobacteraceae	1921-2	NA
ASV_2018	Bacteria	Acidobacteriota	Acidobacteriae	NA	NA	NA	NA
ASV_2019	Bacteria	Elusimicrobiota	Lineage IIa	NA	NA	NA	NA
ASV_2020	Bacteria	Acidobacteriota	Acidobacteriae	Bryobacterales	Bryobacteraceae	Bryobacter	NA
ASV_2021	Bacteria	Acidobacteriota	Acidobacteriae	Solibacterales	Solibacteraceae	Candidatus Solibacter	NA
ASV_2023	Bacteria	Bacteroidota	Bacteroidia	Chitinophagales	Chitinophagaceae	Parafilimonas	NA
ASV_2024	Bacteria	Acidobacteriota	Acidobacteriae	NA	NA	NA	NA
ASV_2026	Bacteria	Bacteroidota	Bacteroidia	Chitinophagales	Chitinophagaceae	NA	NA
ASV_2027	Bacteria	Bacteroidota	Bacteroidia	Cytophagales	NA	NA	NA
ASV_2028	Bacteria	Bdellovibrionota	Bdellovibrionia	Bdellovibrionales	Bdellovibrionaceae	Bdellovibrio	NA
ASV_2033	Bacteria	Chloroflexi	Dehalococcoidia	S085	NA	NA	NA
ASV_2034	Bacteria	NA	NA	NA	NA	NA	NA
ASV_2036	Bacteria	Chloroflexi	Ktedonobacteria	Ktedonobacterales	Ktedonobacteraceae	FCPS473	NA
ASV_2039	Bacteria	Proteobacteria	Gammaproteobacteria	NA	NA	NA	NA
ASV_2040	Bacteria	Proteobacteria	Alphaproteobacteria	Acetobacterales	Acetobacteraceae	Acidicaldus	NA
ASV_2042	Bacteria	Acidobacteriota	Acidobacteriae	Acidobacteriales	Koribacteraceae	Candidatus Koribacter	NA
ASV_2045	Bacteria	Firmicutes	Bacilli	Alicyclobacillales	Alicyclobacillaceae	Alicyclobacillus	NA
ASV_2046	Bacteria	Acidobacteriota	Acidobacteriae	Bryobacterales	Bryobacteraceae	Bryobacter	NA
ASV_2047	Bacteria	Chloroflexi	Ktedonobacteria	Ktedonobacterales	Ktedonobacteraceae	Thermosporothrix	NA
ASV_2048	Bacteria	Chloroflexi	Chloroflexia	Elev-1554	NA	NA	NA
ASV_2049	Bacteria	Chloroflexi	Ktedonobacteria	Ktedonobacterales	Ktedonobacteraceae	1921-3	NA
ASV_2052	Bacteria	Proteobacteria	Alphaproteobacteria	Caulobacterales	Caulobacteraceae	Asticcacaulis	NA
ASV_2054	Bacteria	Proteobacteria	Gammaproteobacteria	Xanthomonadales	NA	NA	NA
ASV_2055	Bacteria	NA	NA	NA	NA	NA	NA
ASV_2056	Bacteria	NA	NA	NA	NA	NA	NA
ASV_2057	Bacteria	Dependentiae	Babeliae	Babeliales	Vermiphilaceae	NA	NA
ASV_2058	Bacteria	Elusimicrobiota	Lineage IIa	NA	NA	NA	NA
ASV_2059	Bacteria	Acidobacteriota	Acidobacteriae	Acidobacteriales	Acidobacteriaceae (Subgroup 1)	Acidipila	NA
ASV_2060	Bacteria	Actinobacteriota	Actinobacteria	NA	NA	NA	NA
ASV_2062	Bacteria	Planctomycetota	Planctomycetes	Pirellulales	Pirellulaceae	NA	NA
ASV_2063	Bacteria	Chloroflexi	Ktedonobacteria	Ktedonobacterales	Ktedonobacteraceae	NA	NA
ASV_2064	Bacteria	Proteobacteria	Gammaproteobacteria	NA	NA	NA	NA
ASV_2065	Bacteria	NA	NA	NA	NA	NA	NA
ASV_2066	Bacteria	Verrucomicrobiota	Verrucomicrobiae	Pedosphaerales	Pedosphaeraceae	NA	NA
ASV_2067	Bacteria	NA	NA	NA	NA	NA	NA
ASV_2069	Bacteria	Proteobacteria	Alphaproteobacteria	Acetobacterales	Acetobacteraceae	NA	NA
ASV_2070	Bacteria	Myxococcota	Polyangia	Polyangiales	Polyangiaceae	Pajaroellobacter	NA
ASV_2073	Bacteria	Cyanobacteria	Cyanobacteriia	Cyanobacteriales	Nostocaceae	Nostoc PCC-73102	NA
ASV_2075	Bacteria	Actinobacteriota	Acidimicrobiia	IMCC26256	NA	NA	NA
ASV_2076	Bacteria	Proteobacteria	Alphaproteobacteria	Sphingomonadales	Sphingomonadaceae	Sphingomonas	NA
ASV_2077	Bacteria	Myxococcota	Polyangia	Polyangiales	Polyangiaceae	Pajaroellobacter	NA
ASV_2078	Bacteria	Firmicutes	Bacilli	Paenibacillales	Paenibacillaceae	Cohnella	NA
ASV_2079	Bacteria	Dependentiae	Babeliae	Babeliales	Vermiphilaceae	NA	NA
ASV_2082	Bacteria	NA	NA	NA	NA	NA	NA
ASV_2083	Bacteria	NA	NA	NA	NA	NA	NA
ASV_2085	Bacteria	Proteobacteria	Gammaproteobacteria	Diplorickettsiales	Diplorickettsiaceae	Aquicella	NA
ASV_2086	Bacteria	Acidobacteriota	Acidobacteriae	Bryobacterales	Bryobacteraceae	Bryobacter	NA
ASV_2088	Bacteria	Dependentiae	Babeliae	Babeliales	Vermiphilaceae	NA	NA
ASV_2089	Bacteria	Proteobacteria	Alphaproteobacteria	NA	NA	NA	NA
ASV_2092	Bacteria	Chloroflexi	Ktedonobacteria	Ktedonobacterales	JG30-KF-AS9	NA	NA
ASV_2094	Bacteria	Proteobacteria	Alphaproteobacteria	Rhizobiales	Beijerinckiaceae	Methylobacterium-Methylorubrum	NA
ASV_2095	Bacteria	Patescibacteria	Saccharimonadia	Saccharimonadales	NA	NA	NA
ASV_2096	Bacteria	Actinobacteriota	Acidimicrobiia	IMCC26256	NA	NA	NA
ASV_2097	Bacteria	Proteobacteria	Gammaproteobacteria	Diplorickettsiales	Diplorickettsiaceae	Aquicella	NA
ASV_2099	Bacteria	Proteobacteria	Alphaproteobacteria	Rhodospirillales	Magnetospirillaceae	NA	NA
ASV_2100	Bacteria	Bacteroidota	Bacteroidia	Sphingobacteriales	Sphingobacteriaceae	NA	NA
ASV_2101	Bacteria	RCP2-54	NA	NA	NA	NA	NA
ASV_2102	Bacteria	Acidobacteriota	Acidobacteriae	Subgroup 2	NA	NA	NA
ASV_2105	Bacteria	Proteobacteria	Gammaproteobacteria	Burkholderiales	NA	NA	NA
ASV_2106	Bacteria	Bacteroidota	Bacteroidia	Chitinophagales	37-13	NA	NA
ASV_2107	Bacteria	Planctomycetota	Planctomycetes	Planctomycetales	Schlesneriaceae	Schlesneria	NA
ASV_2108	Bacteria	WPS-2	NA	NA	NA	NA	NA
ASV_2111	Bacteria	Bacteroidota	Bacteroidia	NA	NA	NA	NA
ASV_2112	Bacteria	NA	NA	NA	NA	NA	NA
ASV_2113	Bacteria	Elusimicrobiota	NA	NA	NA	NA	NA
ASV_2115	Bacteria	Planctomycetota	Phycisphaerae	Tepidisphaerales	NA	NA	NA
ASV_2117	Bacteria	NA	NA	NA	NA	NA	NA
ASV_2118	Bacteria	Planctomycetota	Phycisphaerae	NA	NA	NA	NA
ASV_2119	Bacteria	Chloroflexi	Ktedonobacteria	Ktedonobacterales	JG30-KF-AS9	NA	NA
ASV_2121	Bacteria	NA	NA	NA	NA	NA	NA
ASV_2123	Bacteria	Planctomycetota	Phycisphaerae	Tepidisphaerales	WD2101 soil group	NA	NA
ASV_2125	Bacteria	Proteobacteria	Alphaproteobacteria	Rickettsiales	SM2D12	NA	NA
ASV_2126	Bacteria	NA	NA	NA	NA	NA	NA
ASV_2128	Bacteria	Myxococcota	Polyangia	Polyangiales	Polyangiaceae	Pajaroellobacter	NA
ASV_2129	Bacteria	Myxococcota	Polyangia	Polyangiales	Polyangiaceae	Pajaroellobacter	NA
ASV_2132	Bacteria	NA	NA	NA	NA	NA	NA
ASV_2136	Bacteria	Acidobacteriota	Acidobacteriae	Acidobacteriales	NA	NA	NA
ASV_2137	Bacteria	Bacteroidota	Bacteroidia	Chitinophagales	Chitinophagaceae	NA	NA
ASV_2139	Bacteria	NA	NA	NA	NA	NA	NA
ASV_2141	Bacteria	Proteobacteria	Alphaproteobacteria	Acetobacterales	Acetobacteraceae	Acidiphilium	NA
ASV_2142	Bacteria	Proteobacteria	Gammaproteobacteria	NA	NA	NA	NA
ASV_2143	Bacteria	Chloroflexi	Ktedonobacteria	Ktedonobacterales	JG30-KF-AS9	NA	NA
ASV_2144	Bacteria	Bacteroidota	Bacteroidia	Sphingobacteriales	CWT CU03-E12	NA	NA
ASV_2145	Bacteria	Verrucomicrobiota	Verrucomicrobiae	Pedosphaerales	Pedosphaeraceae	NA	NA
ASV_2146	Bacteria	Acidobacteriota	Blastocatellia	2024-11-01	NA	NA	NA
ASV_2149	Bacteria	Dependentiae	Babeliae	Babeliales	NA	NA	NA
ASV_2150	Bacteria	Bacteroidota	Bacteroidia	Chitinophagales	Chitinophagaceae	NA	NA
ASV_2153	Bacteria	Actinobacteriota	Acidimicrobiia	NA	NA	NA	NA
ASV_2155	Archaea	Thermoplasmatota	Thermoplasmata	Thermoplasmatales	Thermoplasmataceae	NA	NA
ASV_2158	Bacteria	Bacteroidota	Bacteroidia	Cytophagales	NA	NA	NA
ASV_2159	Bacteria	Patescibacteria	Saccharimonadia	Saccharimonadales	NA	NA	NA
ASV_2161	Bacteria	Proteobacteria	Alphaproteobacteria	Rickettsiales	Rickettsiaceae	NA	NA
ASV_2163	Bacteria	Acidobacteriota	Acidobacteriae	NA	NA	NA	NA
ASV_2168	Bacteria	Elusimicrobiota	Lineage IIa	NA	NA	NA	NA
ASV_2169	Bacteria	Proteobacteria	Alphaproteobacteria	Rhizobiales	Beijerinckiaceae	1174-901-12	NA
ASV_2171	Bacteria	NA	NA	NA	NA	NA	NA
ASV_2175	Bacteria	Dependentiae	Babeliae	Babeliales	NA	NA	NA
ASV_2177	Bacteria	NA	NA	NA	NA	NA	NA
ASV_2178	Bacteria	Patescibacteria	Saccharimonadia	Saccharimonadales	NA	NA	NA
ASV_2180	Bacteria	Actinobacteriota	Thermoleophilia	Gaiellales	Gaiellaceae	Gaiella	NA
ASV_2181	Bacteria	NA	NA	NA	NA	NA	NA
ASV_2183	Bacteria	Patescibacteria	Microgenomatia	Candidatus Daviesbacteria	NA	NA	NA
ASV_2184	Bacteria	Verrucomicrobiota	Verrucomicrobiae	Pedosphaerales	Pedosphaeraceae	NA	NA
ASV_2186	Bacteria	Verrucomicrobiota	Verrucomicrobiae	Chthoniobacterales	NA	NA	NA
ASV_2191	Bacteria	Proteobacteria	Gammaproteobacteria	Gammaproteobacteria Incertae Sedis	Unknown Family_4	Candidatus Berkiella	NA
ASV_2192	Bacteria	Proteobacteria	Gammaproteobacteria	Burkholderiales	Nitrosomonadaceae	Ellin6067	NA
ASV_2196	Bacteria	Planctomycetota	Planctomycetes	Isosphaerales	Isosphaeraceae	NA	NA
ASV_2199	Bacteria	Verrucomicrobiota	Chlamydiae	Chlamydiales	Parachlamydiaceae	NA	NA
ASV_2201	Bacteria	Chloroflexi	Ktedonobacteria	B12-WMSP1	NA	NA	NA
ASV_2203	Bacteria	NA	NA	NA	NA	NA	NA
ASV_2204	Bacteria	NA	NA	NA	NA	NA	NA
ASV_2206	Bacteria	Elusimicrobiota	Lineage IIa	NA	NA	NA	NA
ASV_2207	Bacteria	Bdellovibrionota	Bdellovibrionia	Bdellovibrionales	Bdellovibrionaceae	Bdellovibrio	NA
ASV_2212	Bacteria	Patescibacteria	Saccharimonadia	Saccharimonadales	NA	NA	NA
ASV_2213	Bacteria	Bacteroidota	Bacteroidia	Chitinophagales	Chitinophagaceae	Ferruginibacter	NA
ASV_2215	Bacteria	Acidobacteriota	Acidobacteriae	Subgroup 2	NA	NA	NA
ASV_2219	Bacteria	Patescibacteria	Parcubacteria	Candidatus Kaiserbacteria	NA	NA	NA
ASV_2222	Bacteria	RCP2-54	NA	NA	NA	NA	NA
ASV_2223	Bacteria	Acidobacteriota	Acidobacteriae	NA	NA	NA	NA
ASV_2226	Bacteria	Bacteroidota	Bacteroidia	Chitinophagales	Chitinophagaceae	NA	NA
ASV_2227	Bacteria	NA	NA	NA	NA	NA	NA
ASV_2228	Bacteria	Verrucomicrobiota	Verrucomicrobiae	Pedosphaerales	Pedosphaeraceae	NA	NA
ASV_2231	Bacteria	Acidobacteriota	Acidobacteriae	Acidobacteriales	NA	NA	NA
ASV_2234	Bacteria	Dependentiae	Babeliae	Babeliales	Vermiphilaceae	NA	NA
ASV_2235	Bacteria	Elusimicrobiota	Elusimicrobia	Lineage IV	NA	NA	NA
ASV_2236	Bacteria	Acidobacteriota	Acidobacteriae	Subgroup 2	NA	NA	NA
ASV_2239	Bacteria	Chloroflexi	Ktedonobacteria	Ktedonobacterales	Ktedonobacteraceae	HSB OF53-F07	NA
ASV_2241	Bacteria	Planctomycetota	Planctomycetes	Gemmatales	Gemmataceae	NA	NA
ASV_2243	Bacteria	NA	NA	NA	NA	NA	NA
ASV_2244	Bacteria	Proteobacteria	Alphaproteobacteria	Paracaedibacterales	Paracaedibacteraceae	Candidatus Paracaedibacter	NA
ASV_2248	Bacteria	RCP2-54	NA	NA	NA	NA	NA
ASV_2250	Bacteria	Proteobacteria	Gammaproteobacteria	NA	NA	NA	NA
ASV_2251	Bacteria	NA	NA	NA	NA	NA	NA
ASV_2252	Bacteria	Acidobacteriota	Acidobacteriae	NA	NA	NA	NA
ASV_2253	Bacteria	WPS-2	NA	NA	NA	NA	NA
ASV_2257	Bacteria	NA	NA	NA	NA	NA	NA
ASV_2259	Bacteria	Proteobacteria	Gammaproteobacteria	JG36-TzT-191	NA	NA	NA
ASV_2260	Bacteria	Bacteroidota	Bacteroidia	Chitinophagales	Chitinophagaceae	NA	NA
ASV_2261	Bacteria	Bacteroidota	Bacteroidia	Flavobacteriales	Flavobacteriaceae	NA	NA
ASV_2262	Bacteria	Acidobacteriota	Acidobacteriae	NA	NA	NA	NA
ASV_2264	Bacteria	Firmicutes	Bacilli	Lactobacillales	NA	NA	NA
ASV_2266	Bacteria	Bacteroidota	Bacteroidia	Sphingobacteriales	Sphingobacteriaceae	NA	NA
ASV_2267	Bacteria	NA	NA	NA	NA	NA	NA
ASV_2268	Bacteria	NA	NA	NA	NA	NA	NA
ASV_2269	Bacteria	Dependentiae	Babeliae	Babeliales	Vermiphilaceae	NA	NA
ASV_2270	Bacteria	Proteobacteria	Gammaproteobacteria	NA	NA	NA	NA
ASV_2271	Bacteria	NA	NA	NA	NA	NA	NA
ASV_2272	Bacteria	Actinobacteriota	Actinobacteria	Frankiales	Acidothermaceae	Acidothermus	NA
ASV_2274	Bacteria	Nitrospirota	Nitrospiria	Nitrospirales	Nitrospiraceae	Nitrospira	NA
ASV_2279	Bacteria	Acidobacteriota	Acidobacteriae	Acidobacteriales	Koribacteraceae	Candidatus Koribacter	NA
ASV_2280	Bacteria	Proteobacteria	Alphaproteobacteria	Rhizobiales	Beijerinckiaceae	Methylobacterium-Methylorubrum	NA
ASV_2283	Bacteria	Proteobacteria	Gammaproteobacteria	NA	NA	NA	NA
ASV_2286	Bacteria	WPS-2	NA	NA	NA	NA	NA
ASV_2288	Bacteria	Verrucomicrobiota	Verrucomicrobiae	Chthoniobacterales	Chthoniobacteraceae	Chthoniobacter	NA
ASV_2289	Bacteria	Actinobacteriota	Actinobacteria	Corynebacteriales	NA	NA	NA
ASV_2290	Bacteria	NA	NA	NA	NA	NA	NA
ASV_2291	Bacteria	Proteobacteria	Alphaproteobacteria	NA	NA	NA	NA
ASV_2292	Bacteria	Planctomycetota	Phycisphaerae	Tepidisphaerales	WD2101 soil group	NA	NA
ASV_2293	Bacteria	Proteobacteria	Alphaproteobacteria	Caulobacterales	Caulobacteraceae	NA	NA
ASV_2294	Bacteria	Dependentiae	Babeliae	Babeliales	Vermiphilaceae	NA	NA
ASV_2296	Bacteria	Bdellovibrionota	Bdellovibrionia	Bdellovibrionales	Bdellovibrionaceae	Bdellovibrio	NA
ASV_2302	Bacteria	Bacteroidota	Bacteroidia	Chitinophagales	Chitinophagaceae	NA	NA
ASV_2304	Bacteria	NA	NA	NA	NA	NA	NA
ASV_2305	Bacteria	NA	NA	NA	NA	NA	NA
ASV_2307	Bacteria	Myxococcota	Polyangia	Haliangiales	Haliangiaceae	Haliangium	NA
ASV_2308	Bacteria	Patescibacteria	Microgenomatia	Candidatus Gottesmanbacteria	NA	NA	NA
ASV_2310	Bacteria	Chloroflexi	Ktedonobacteria	Ktedonobacterales	Ktedonobacteraceae	NA	NA
ASV_2311	Bacteria	Bacteroidota	Kapabacteria	Kapabacteriales	NA	NA	NA
ASV_2313	Bacteria	Chloroflexi	Ktedonobacteria	Ktedonobacterales	NA	NA	NA
ASV_2316	Bacteria	Planctomycetota	Planctomycetes	Isosphaerales	Isosphaeraceae	NA	NA
ASV_2320	Bacteria	Proteobacteria	Gammaproteobacteria	Burkholderiales	Nitrosomonadaceae	MND1	NA
ASV_2322	Bacteria	Proteobacteria	Alphaproteobacteria	Rhizobiales	NA	NA	NA
ASV_2326	Bacteria	Patescibacteria	Saccharimonadia	Saccharimonadales	NA	NA	NA
ASV_2327	Bacteria	WPS-2	NA	NA	NA	NA	NA
ASV_2332	Bacteria	Myxococcota	Polyangia	mle1-27	NA	NA	NA
ASV_2334	Bacteria	Planctomycetota	BD7-11	NA	NA	NA	NA
ASV_2336	Bacteria	Planctomycetota	Phycisphaerae	Tepidisphaerales	WD2101 soil group	NA	NA
ASV_2337	Bacteria	Chloroflexi	Ktedonobacteria	Ktedonobacterales	JG30-KF-AS9	NA	NA
ASV_2339	Bacteria	Chloroflexi	Ktedonobacteria	Ktedonobacterales	Ktedonobacteraceae	NA	NA
ASV_2342	Bacteria	NA	NA	NA	NA	NA	NA
ASV_2345	Bacteria	Acidobacteriota	Acidobacteriae	Acidobacteriales	Acidobacteriaceae (Subgroup 1)	Acidicapsa	NA
ASV_2347	Bacteria	Acidobacteriota	Acidobacteriae	NA	NA	NA	NA
ASV_2348	Bacteria	Verrucomicrobiota	Verrucomicrobiae	NA	NA	NA	NA
ASV_2352	Bacteria	Planctomycetota	Planctomycetes	Gemmatales	Gemmataceae	NA	NA
ASV_2353	Bacteria	Proteobacteria	Alphaproteobacteria	NA	NA	NA	NA
ASV_2355	Bacteria	NA	NA	NA	NA	NA	NA
ASV_2356	Bacteria	Chloroflexi	Ktedonobacteria	Ktedonobacterales	Ktedonobacteraceae	BacC-u-018	NA
ASV_2357	Bacteria	Firmicutes	Clostridia	Clostridiales	Clostridiaceae	Clostridium sensu stricto 12	NA
ASV_2358	Bacteria	Acidobacteriota	Acidobacteriae	Acidobacteriales	NA	NA	NA
ASV_2360	Bacteria	Proteobacteria	Gammaproteobacteria	Gammaproteobacteria Incertae Sedis	Unknown Family_4	Candidatus Berkiella	NA
ASV_2362	Bacteria	Dependentiae	Babeliae	Babeliales	Vermiphilaceae	NA	NA
ASV_2365	Bacteria	Actinobacteriota	Actinobacteria	Frankiales	Acidothermaceae	Acidothermus	NA
ASV_2366	Bacteria	Verrucomicrobiota	Verrucomicrobiae	Pedosphaerales	Pedosphaeraceae	NA	NA
ASV_2367	Bacteria	Bacteroidota	Bacteroidia	Sphingobacteriales	env.OPS 17	NA	NA
ASV_2370	Bacteria	NA	NA	NA	NA	NA	NA
ASV_2371	Bacteria	Myxococcota	Polyangia	Haliangiales	Haliangiaceae	Haliangium	NA
ASV_2372	Bacteria	Acidobacteriota	Acidobacteriae	Subgroup 2	NA	NA	NA
ASV_2375	Bacteria	Gemmatimonadota	Gemmatimonadetes	Gemmatimonadales	Gemmatimonadaceae	Roseisolibacter	NA
ASV_2376	Bacteria	Verrucomicrobiota	Chlamydiae	Chlamydiales	Parachlamydiaceae	NA	NA
ASV_2377	Bacteria	NA	NA	NA	NA	NA	NA
ASV_2379	Bacteria	NA	NA	NA	NA	NA	NA
ASV_2380	Bacteria	WPS-2	NA	NA	NA	NA	NA
ASV_2381	Bacteria	Proteobacteria	Gammaproteobacteria	Xanthomonadales	NA	NA	NA
ASV_2384	Bacteria	Verrucomicrobiota	Verrucomicrobiae	S-BQ2-57 soil group	NA	NA	NA
ASV_2385	Bacteria	Chloroflexi	NA	NA	NA	NA	NA
ASV_2387	Bacteria	NA	NA	NA	NA	NA	NA
ASV_2389	Bacteria	Planctomycetota	Pla4 lineage	NA	NA	NA	NA
ASV_2390	Bacteria	Planctomycetota	Planctomycetes	Isosphaerales	Isosphaeraceae	Singulisphaera	NA
ASV_2393	Bacteria	NA	NA	NA	NA	NA	NA
ASV_2394	Bacteria	Bdellovibrionota	Oligoflexia	0319-6G20	NA	NA	NA
ASV_2397	Bacteria	Dependentiae	Babeliae	Babeliales	NA	NA	NA
ASV_2399	Bacteria	NA	NA	NA	NA	NA	NA
ASV_2401	Bacteria	Chloroflexi	Ktedonobacteria	Ktedonobacterales	JG30-KF-AS9	NA	NA
ASV_2403	Bacteria	Bacteroidota	Bacteroidia	Cytophagales	Amoebophilaceae	Candidatus Amoebophilus	NA
ASV_2406	Bacteria	Planctomycetota	Planctomycetes	Isosphaerales	Isosphaeraceae	NA	NA
ASV_2410	Bacteria	Acidobacteriota	Acidobacteriae	Solibacterales	Solibacteraceae	Candidatus Solibacter	NA
ASV_2413	Bacteria	Chloroflexi	Ktedonobacteria	Ktedonobacterales	Ktedonobacteraceae	1959-1	NA
ASV_2414	Bacteria	Verrucomicrobiota	Verrucomicrobiae	NA	NA	NA	NA
ASV_2418	Bacteria	Bacteroidota	Bacteroidia	NA	NA	NA	NA
ASV_2419	Bacteria	NA	NA	NA	NA	NA	NA
ASV_2420	Bacteria	Proteobacteria	Gammaproteobacteria	NA	NA	NA	NA
ASV_2428	Bacteria	NA	NA	NA	NA	NA	NA
ASV_2429	Bacteria	NA	NA	NA	NA	NA	NA
ASV_2430	Bacteria	Planctomycetota	Planctomycetes	Isosphaerales	Isosphaeraceae	NA	NA
ASV_2434	Bacteria	Actinobacteriota	Actinobacteria	Frankiales	Acidothermaceae	Acidothermus	NA
ASV_2435	Bacteria	NA	NA	NA	NA	NA	NA
ASV_2442	Bacteria	Verrucomicrobiota	Verrucomicrobiae	Chthoniobacterales	Chthoniobacteraceae	Candidatus Udaeobacter	NA
ASV_2445	Bacteria	WPS-2	NA	NA	NA	NA	NA
ASV_2447	Bacteria	Verrucomicrobiota	Verrucomicrobiae	Opitutales	Opitutaceae	Lacunisphaera	NA
ASV_2448	Bacteria	Chloroflexi	Ktedonobacteria	Ktedonobacterales	JG30-KF-AS9	NA	NA
ASV_2449	Bacteria	Acidobacteriota	Acidobacteriae	Subgroup 2	NA	NA	NA
ASV_2451	Bacteria	Proteobacteria	Alphaproteobacteria	Rickettsiales	NA	Candidatus Jidaibacter	NA
ASV_2454	Bacteria	NA	NA	NA	NA	NA	NA
ASV_2458	Bacteria	Bdellovibrionota	Bdellovibrionia	Bdellovibrionales	Bdellovibrionaceae	Bdellovibrio	NA
ASV_2459	Archaea	Thermoplasmatota	Thermoplasmata	Thermoplasmatales	NA	Thermogymnomonas	NA
ASV_2466	Bacteria	Bacteroidota	Bacteroidia	Cytophagales	Hymenobacteraceae	Hymenobacter	NA
ASV_2467	Bacteria	Chloroflexi	Ktedonobacteria	Ktedonobacterales	Ktedonobacteraceae	NA	NA
ASV_2471	Bacteria	NA	NA	NA	NA	NA	NA
ASV_2472	Bacteria	Proteobacteria	Alphaproteobacteria	NA	NA	NA	NA
ASV_2473	Bacteria	NA	NA	NA	NA	NA	NA
ASV_2475	Bacteria	Bacteroidota	Bacteroidia	Chitinophagales	Chitinophagaceae	NA	NA
ASV_2476	Bacteria	NA	NA	NA	NA	NA	NA
ASV_2477	Bacteria	NA	NA	NA	NA	NA	NA
ASV_2481	Bacteria	Bacteroidota	Bacteroidia	Chitinophagales	Chitinophagaceae	NA	NA
ASV_2482	Bacteria	Proteobacteria	Gammaproteobacteria	Coxiellales	Coxiellaceae	Coxiella	NA
ASV_2487	Bacteria	Planctomycetota	Planctomycetes	Gemmatales	Gemmataceae	Gemmata	NA
ASV_2492	Bacteria	NA	NA	NA	NA	NA	NA
ASV_2493	Bacteria	Acidobacteriota	Acidobacteriae	Acidobacteriales	Acidobacteriaceae (Subgroup 1)	NA	NA
ASV_2496	Bacteria	Actinobacteriota	NA	NA	NA	NA	NA
ASV_2498	Bacteria	Chloroflexi	Ktedonobacteria	Ktedonobacterales	Ktedonobacteraceae	NA	NA
ASV_2499	Bacteria	NA	NA	NA	NA	NA	NA
ASV_2500	Bacteria	NA	NA	NA	NA	NA	NA
ASV_2507	Bacteria	Chloroflexi	Ktedonobacteria	C0119	NA	NA	NA
ASV_2508	Bacteria	Patescibacteria	Microgenomatia	Candidatus Daviesbacteria	NA	NA	NA
ASV_2509	Bacteria	Proteobacteria	Gammaproteobacteria	NA	NA	NA	NA
ASV_2510	Bacteria	Planctomycetota	Planctomycetes	Isosphaerales	Isosphaeraceae	NA	NA
ASV_2513	Bacteria	WPS-2	NA	NA	NA	NA	NA
ASV_2515	Bacteria	Myxococcota	NA	NA	NA	NA	NA
ASV_2517	Bacteria	Verrucomicrobiota	Chlamydiae	Chlamydiales	cvE6	NA	NA
ASV_2518	Bacteria	Proteobacteria	Alphaproteobacteria	Rhizobiales	Xanthobacteraceae	NA	NA
ASV_2520	Bacteria	Bacteroidota	Bacteroidia	Chitinophagales	Chitinophagaceae	NA	NA
ASV_2521	Bacteria	Acidobacteriota	Blastocatellia	2024-11-01	NA	NA	NA
ASV_2526	Bacteria	Chloroflexi	AD3	NA	NA	NA	NA
ASV_2530	Bacteria	NA	NA	NA	NA	NA	NA
ASV_2540	Bacteria	Proteobacteria	Gammaproteobacteria	Diplorickettsiales	Diplorickettsiaceae	Aquicella	NA
ASV_2544	Bacteria	Bacteroidota	Bacteroidia	Chitinophagales	Chitinophagaceae	NA	NA
ASV_2545	Bacteria	NA	NA	NA	NA	NA	NA
ASV_2546	Bacteria	NA	NA	NA	NA	NA	NA
ASV_2550	Bacteria	Proteobacteria	Alphaproteobacteria	Caulobacterales	Caulobacteraceae	Asticcacaulis	NA
ASV_2556	Bacteria	Bdellovibrionota	Oligoflexia	0319-6G20	NA	NA	NA
ASV_2558	Bacteria	Proteobacteria	Gammaproteobacteria	NA	NA	NA	NA
ASV_2560	Bacteria	Chloroflexi	Ktedonobacteria	Ktedonobacterales	Ktedonobacteraceae	1921-3	NA
ASV_2562	Bacteria	Dependentiae	Babeliae	Babeliales	Vermiphilaceae	NA	NA
ASV_2563	Bacteria	Proteobacteria	Alphaproteobacteria	Caedibacterales	Caedibacteraceae	Caedibacter	NA
ASV_2568	Archaea	Crenarchaeota	Nitrososphaeria	Group 1.1c	NA	NA	NA
ASV_2569	Bacteria	Myxococcota	Polyangia	Polyangiales	Polyangiaceae	Pajaroellobacter	NA
ASV_2570	Bacteria	Firmicutes	NA	NA	NA	NA	NA
ASV_2573	Bacteria	NA	NA	NA	NA	NA	NA
ASV_2576	Bacteria	NA	NA	NA	NA	NA	NA
ASV_2581	Bacteria	Planctomycetota	Planctomycetes	Isosphaerales	Isosphaeraceae	NA	NA
ASV_2582	Bacteria	Proteobacteria	Alphaproteobacteria	Rhizobiales	Rhizobiaceae	Allorhizobium-Neorhizobium-Pararhizobium-Rhizobium	NA
ASV_2583	Bacteria	Bacteroidota	Bacteroidia	Cytophagales	NA	NA	NA
ASV_2585	Bacteria	Planctomycetota	Phycisphaerae	MSBL9	4572-13	NA	NA
ASV_2586	Bacteria	Patescibacteria	Saccharimonadia	Saccharimonadales	Saccharimonadaceae	TM7a	NA
ASV_2591	Bacteria	Bacteroidota	Bacteroidia	NA	NA	NA	NA
ASV_2597	Bacteria	NA	NA	NA	NA	NA	NA
ASV_2607	Bacteria	Myxococcota	Myxococcia	Myxococcales	Myxococcaceae	P3OB-42	NA
ASV_2608	Bacteria	NA	NA	NA	NA	NA	NA
ASV_2609	Bacteria	Bacteroidota	Bacteroidia	Flavobacteriales	Blattabacteriaceae	Candidatus Uzinura	NA
ASV_2613	Bacteria	Proteobacteria	Alphaproteobacteria	Sphingomonadales	Sphingomonadaceae	NA	NA
ASV_2616	Bacteria	NA	NA	NA	NA	NA	NA
ASV_2617	Bacteria	Dependentiae	Babeliae	Babeliales	NA	NA	NA
ASV_2618	Bacteria	NA	NA	NA	NA	NA	NA
ASV_2619	Bacteria	Verrucomicrobiota	Verrucomicrobiae	Chthoniobacterales	Chthoniobacteraceae	NA	NA
ASV_2622	Bacteria	NA	NA	NA	NA	NA	NA
ASV_2628	Bacteria	NA	NA	NA	NA	NA	NA
ASV_2638	Bacteria	Actinobacteriota	Thermoleophilia	Gaiellales	Gaiellaceae	Gaiella	NA
ASV_2641	Bacteria	Acidobacteriota	Acidobacteriae	NA	NA	NA	NA
ASV_2647	Bacteria	Dependentiae	Babeliae	Babeliales	NA	NA	NA
ASV_2648	Bacteria	Proteobacteria	Gammaproteobacteria	Diplorickettsiales	Diplorickettsiaceae	Aquicella	NA
ASV_2649	Bacteria	Proteobacteria	Alphaproteobacteria	Rickettsiales	NA	Candidatus Jidaibacter	NA
ASV_2650	Bacteria	Chloroflexi	Ktedonobacteria	Ktedonobacterales	Ktedonobacteraceae	JG30a-KF-32	NA
ASV_2651	Bacteria	FCPU426	NA	NA	NA	NA	NA
ASV_2652	Bacteria	Bacteroidota	Bacteroidia	Cytophagales	NA	NA	NA
ASV_2653	Bacteria	Planctomycetota	Planctomycetes	Pirellulales	Pirellulaceae	Rhodopirellula	NA
ASV_2654	Bacteria	Chloroflexi	NA	NA	NA	NA	NA
ASV_2655	Bacteria	MBNT15	NA	NA	NA	NA	NA
ASV_2657	Bacteria	Proteobacteria	Gammaproteobacteria	NA	NA	NA	NA
ASV_2662	Bacteria	WPS-2	NA	NA	NA	NA	NA
ASV_2668	Bacteria	NA	NA	NA	NA	NA	NA
ASV_2672	Bacteria	Planctomycetota	Planctomycetes	Gemmatales	Gemmataceae	NA	NA
ASV_2673	Bacteria	Chloroflexi	Ktedonobacteria	Ktedonobacterales	Ktedonobacteraceae	BacC-u-018	NA
ASV_2676	Bacteria	NA	NA	NA	NA	NA	NA
ASV_2682	Bacteria	Proteobacteria	Gammaproteobacteria	Burkholderiales	NA	NA	NA
ASV_2683	Bacteria	Dependentiae	Babeliae	Babeliales	NA	NA	NA
ASV_2684	Bacteria	Dependentiae	Babeliae	Babeliales	Vermiphilaceae	NA	NA
ASV_2685	Bacteria	Dependentiae	Babeliae	Babeliales	Vermiphilaceae	NA	NA
ASV_2687	Bacteria	NA	NA	NA	NA	NA	NA
ASV_2688	Bacteria	NA	NA	NA	NA	NA	NA
ASV_2693	Bacteria	Bdellovibrionota	Oligoflexia	0319-6G20	NA	NA	NA
ASV_2697	Bacteria	Verrucomicrobiota	Verrucomicrobiae	Opitutales	Opitutaceae	Lacunisphaera	NA
ASV_2698	Bacteria	NA	NA	NA	NA	NA	NA
ASV_2700	Bacteria	NA	NA	NA	NA	NA	NA
ASV_2702	Bacteria	Proteobacteria	Gammaproteobacteria	Burkholderiales	Nitrosomonadaceae	mle1-7	NA
ASV_2704	Bacteria	NA	NA	NA	NA	NA	NA
ASV_2710	Bacteria	Dependentiae	Babeliae	Babeliales	Vermiphilaceae	NA	NA
ASV_2711	Bacteria	Firmicutes	Bacilli	Entomoplasmatales	Entomoplasmatales Incertae Sedis	Candidatus Hepatoplasma	NA
ASV_2712	Bacteria	Myxococcota	Myxococcia	Myxococcales	Myxococcaceae	P3OB-42	NA
ASV_2713	Bacteria	Dependentiae	Babeliae	Babeliales	Vermiphilaceae	NA	NA
ASV_2732	Bacteria	NA	NA	NA	NA	NA	NA
ASV_2737	Bacteria	Planctomycetota	Pla4 lineage	NA	NA	NA	NA
ASV_2740	Bacteria	Firmicutes	Bacilli	Erysipelotrichales	Erysipelatoclostridiaceae	Erysipelatoclostridium	NA
ASV_2743	Bacteria	NA	NA	NA	NA	NA	NA
ASV_2751	Bacteria	Proteobacteria	Alphaproteobacteria	Caulobacterales	Caulobacteraceae	Asticcacaulis	NA
ASV_2752	Bacteria	WPS-2	NA	NA	NA	NA	NA
ASV_2760	Bacteria	NA	NA	NA	NA	NA	NA
ASV_2765	Bacteria	Bacteroidota	Bacteroidia	Chitinophagales	Chitinophagaceae	Edaphobaculum	NA
ASV_2767	Bacteria	Actinobacteriota	Acidimicrobiia	IMCC26256	NA	NA	NA
ASV_2773	Bacteria	Planctomycetota	NA	NA	NA	NA	NA
ASV_2774	Bacteria	NA	NA	NA	NA	NA	NA
ASV_2776	Bacteria	NA	NA	NA	NA	NA	NA
ASV_2778	Bacteria	Bacteroidota	Bacteroidia	Bacteroidales	Rikenellaceae	NA	NA
ASV_2799	Bacteria	NA	NA	NA	NA	NA	NA
ASV_2802	Bacteria	NA	NA	NA	NA	NA	NA
ASV_2803	Bacteria	NA	NA	NA	NA	NA	NA
ASV_2804	Bacteria	RCP2-54	NA	NA	NA	NA	NA
ASV_2820	Bacteria	Desulfobacterota	Desulfovibrionia	Desulfovibrionales	Desulfovibrionaceae	Desulfovibrio	NA
ASV_2821	Bacteria	Spirochaetota	Spirochaetia	Spirochaetales	Spirochaetaceae	NA	NA
ASV_2825	Bacteria	Acidobacteriota	Acidobacteriae	NA	NA	NA	NA
ASV_2828	Bacteria	Patescibacteria	Parcubacteria	Candidatus Kaiserbacteria	NA	NA	NA
ASV_2829	Bacteria	Proteobacteria	Alphaproteobacteria	NA	NA	NA	NA
ASV_2834	Bacteria	Proteobacteria	Gammaproteobacteria	Pseudomonadales	Moraxellaceae	NA	NA
ASV_2836	Bacteria	NA	NA	NA	NA	NA	NA
ASV_2842	Bacteria	Planctomycetota	Pla3 lineage	NA	NA	NA	NA
ASV_2859	Bacteria	Actinobacteriota	WCHB1-81	NA	NA	NA	NA
ASV_2860	Bacteria	NA	NA	NA	NA	NA	NA
ASV_2863	Bacteria	Acidobacteriota	Holophagae	Holophagales	Holophagaceae	Geothrix	NA
ASV_2879	Bacteria	NA	NA	NA	NA	NA	NA
ASV_2888	Bacteria	Planctomycetota	Phycisphaerae	CCM11a	NA	NA	NA
ASV_2889	Bacteria	Firmicutes	Clostridia	Oscillospirales	NA	NA	NA

## Sheet: Table S5. Figure 4 values
Table S5. Differences in percent potential respiration between the adapted and unadapted temperature response curves at 4.5°C of soil warming.
		Instantaneous soil temperature (°C)
		1	2	3	4	5	6	7	8	9	10	11	12	13	14	15	16	17	18	19	20	21	22	23	24	25	26	27	28	29	30	31	32	33	34	35	36	37	38	39	40	41	42	43	44	45
Mean environmental soil temperature (°C)	10	-3.16507	-3.23399	-3.31924	-3.41991	-3.53484	-3.66491	-3.80886	-3.96476	-4.13313	-4.30998	-4.49467	-4.68241	-4.86722	-5.04518	-5.20759	-5.34469	-5.44773	-5.50406	-5.50111	-5.4255	-5.2635	-5.00405	-4.63249	-4.14079	-3.52698	-2.78173	-1.91134	-0.930603	0.158012	1.32156	2.54867	3.80257	5.04272	6.24944	7.38069	8.39833	9.28636	10.0154	10.5667	10.9382	11.1253	11.1348	10.9796	10.6773	10.2529
	11	-3.03552	-3.12309	-3.22614	-3.34354	-3.47382	-3.61789	-3.77414	-3.94038	-4.11701	-4.29977	-4.48795	-4.67663	-4.85985	-5.03377	-5.18994	-5.31901	-5.41269	-5.45902	-5.44636	-5.36214	-5.19381	-4.93146	-4.56155	-4.07722	-3.47737	-2.75363	-1.91277	-0.969469	0.073564	1.18459	2.3527	3.54293	4.71696	5.85642	6.92187	7.87778	8.70948	9.3899	9.90189	10.2442	10.4128	10.4149	10.263	9.97403	9.57181
	12	-2.85576	-2.96606	-3.09069	-3.22825	-3.37702	-3.53789	-3.70891	-3.88757	-4.07422	-4.26427	-4.45693	-4.64717	-4.82906	-4.99892	-5.14855	-5.26914	-5.3529	-5.38877	-5.36612	-5.27345	-5.09954	-4.83584	-4.47021	-3.99712	-3.4165	-2.72117	-1.9184	-1.02273	-0.0371347	1.00816	2.1028	3.21404	4.30636	5.36295	6.34763	7.22808	7.99132	8.61309	9.07836	9.38666	9.53519	9.53117	9.38674	9.11811	8.74755
	13	-2.64117	-2.77435	-2.92054	-3.07812	-3.24514	-3.42257	-3.60818	-3.79921	-3.99597	-4.19361	-4.39136	-4.58409	-4.76593	-4.93337	-5.07851	-5.19302	-5.26965	-5.29814	-5.26887	-5.17133	-4.99557	-4.7343	-4.3767	-3.9185	-3.36057	-2.69687	-1.93508	-1.08954	-0.163477	0.814441	1.83444	2.86604	3.87649	4.85061	5.75548	6.56198	7.25891	7.82479	8.24677	8.52522	8.65844	8.65381	8.52309	8.28166	7.9502
	14	-2.4147	-2.56891	-2.73487	-2.91086	-3.09481	-3.28783	-3.4875	-3.69089	-3.89839	-4.10492	-4.30976	-4.50771	-4.69294	-4.86209	-5.00746	-5.12105	-5.19605	-5.22279	-5.19235	-5.09505	-4.92188	-4.66651	-4.31922	-3.87668	-3.3405	-2.70557	-1.97991	-1.17767	-0.302276	0.618924	1.57665	2.54233	3.48558	4.39265	5.2334	5.98147	6.62724	7.15167	7.54372	7.8046	7.93355	7.93799	7.82944	7.62242	7.3361
	15	-2.19515	-2.36843	-2.55252	-2.74565	-2.9457	-3.154	-3.36797	-3.5846	-3.80433	-4.02191	-4.23666	-4.44328	-4.63589	-4.81122	-4.96164	-5.07928	-5.15765	-5.1874	-5.16006	-5.06658	-4.89858	-4.65045	-4.31334	-3.88465	-3.36661	-2.75491	-2.05787	-1.28954	-0.45362	0.423578	1.33314	2.24803	3.13977	3.99583	4.78843	5.49351	6.10292	6.5997	6.97437	7.22903	7.36368	7.38578	7.3067	7.14016	6.90384
	16	-1.99876	-2.19005	-2.39167	-2.60185	-2.81844	-3.04295	-3.27271	-3.50454	-3.73899	-3.9705	-4.19847	-4.41737	-4.62112	-4.80653	-4.96582	-5.0911	-5.17605	-5.21147	-5.18915	-5.10047	-4.93756	-4.69536	-4.36574	-3.94682	-3.44139	-2.84593	-2.16915	-1.42523	-0.618143	0.226426	1.09981	1.97613	2.82846	3.64533	4.40094	5.07326	5.65554	6.13267	6.49666	6.75053	6.89504	6.93772	6.88997	6.76476	6.57845
	17	-1.84453	-2.0538	-2.27355	-2.50198	-2.73682	-2.97978	-3.22799	-3.47803	-3.73051	-3.97944	-4.22419	-4.45888	-4.6771	-4.87559	-5.04629	-5.18114	-5.27385	-5.31523	-5.29722	-5.21155	-5.05078	-4.81038	-4.48294	-4.06729	-3.56696	-2.97922	-2.3134	-1.58404	-0.795535	0.0267074	0.874121	1.72167	2.54364	3.32955	4.0553	4.70071	5.26039	5.72104	6.07609	6.32958	6.4831	6.54435	6.52489	6.43707	6.2961
	18	-1.74375	-1.97183	-2.21118	-2.45985	-2.71539	-2.97964	-3.24941	-3.52091	-3.79471	-4.06423	-4.32872	-4.58177	-4.81649	-5.02944	-5.21213	-5.35622	-5.45539	-5.50037	-5.48326	-5.39613	-5.23199	-4.98702	-4.65456	-4.23437	-3.73099	-3.1426	-2.47946	-1.75677	-0.979506	-0.173134	0.653747	1.47672	2.27115	3.02747	3.72326	4.34021	4.87439	5.31438	5.65525	5.90215	6.05772	6.13007	6.13093	6.07228	5.9683
	19	-1.6996	-1.94576	-2.20439	-2.47339	-2.75005	-3.03623	-3.32838	-3.62223	-3.91825	-4.20915	-4.49398	-4.76569	-5.01683	-5.2437	-5.43732	-5.58897	-5.69229	-5.73789	-5.71805	-5.62516	-5.45277	-5.19786	-4.85456	-4.42373	-3.9111	-3.31585	-2.64939	-1.92782	-1.15681	-0.362141	0.447435	1.24792	2.01565	2.74184	3.40571	3.99081	4.49458	4.9076	5.2267	5.45814	5.60575	5.67829	5.68769	5.64574	5.56586
	20	-1.71399	-1.9763	-2.25265	-2.54069	-2.83738	-3.1446	-3.45833	-3.77379	-4.09125	-4.4027	-4.70687	-4.99608	-5.26221	-5.50127	-5.70373	-5.86052	-5.96512	-6.00809	-5.98188	-5.87915	-5.69408	-5.4245	-5.06533	-4.61863	-4.09141	-3.48395	-2.8089	-2.08346	-1.31409	-0.527085	0.268511	1.04892	1.79123	2.48732	3.11784	3.66808	4.13674	4.51631	4.80537	5.01124	5.13903	5.1983	5.20119	5.15953	5.08632
	21	-1.7767	-2.05295	-2.34499	-2.65023	-2.96529	-3.29195	-3.62573	-3.96128	-4.29864	-4.629	-4.95077	-5.25553	-5.53456	-5.78345	-5.99215	-6.15122	-6.25397	-6.29088	-6.25464	-6.13815	-5.93623	-5.64766	-5.26812	-4.80097	-4.25462	-3.63042	-2.94247	-2.20917	-1.43788	-0.655623	0.128103	0.889519	1.60625	2.27065	2.86456	3.37487	3.80133	4.13824	4.38597	4.55272	4.64505	4.67353	4.65048	4.58814	4.49946
	22	-1.86205	-2.14983	-2.45526	-2.7755	-3.10679	-3.45082	-3.8026	-4.15624	-4.51147	-4.85872	-5.19602	-5.51424	-5.80401	-6.06052	-6.27317	-6.43221	-6.5307	-6.5591	-6.51035	-6.37757	-6.15627	-5.84617	-5.44375	-4.95367	-4.38579	-3.74257	-3.03963	-2.29667	-1.52203	-0.743624	0.0284551	0.770232	1.4597	2.0894	2.64222	3.10649	3.48274	3.76701	3.96146	4.07505	4.11585	4.09574	4.02718	3.92317	3.79708
	23	-1.95287	-2.2489	-2.56433	-2.89609	-3.24011	-3.59793	-3.96413	-4.33231	-4.70188	-5.06261	-5.41213	-5.74069	-6.03833	-6.29987	-6.51422	-6.67137	-6.76418	-6.7831	-6.72134	-6.57226	-6.33197	-6.00116	-5.57698	-5.06534	-4.47744	-3.81678	-3.10035	-2.34909	-1.57227	-0.798659	-0.0389647	0.682582	1.34422	1.93856	2.44929	2.86597	3.18969	3.41798	3.55461	3.60907	3.59089	3.51325	3.38867	3.23106	3.05446
	24	-2.03157	-2.33275	-2.65484	-2.99458	-3.34766	-3.71545	-4.09218	-4.47103	-4.85114	-5.22171	-5.58005	-5.91587	-6.21878	-6.48325	-6.69785	-6.85234	-6.93946	-6.94968	-6.87646	-6.71338	-6.45713	-6.10915	-5.66722	-5.13827	-4.5346	-3.86056	-3.13428	-2.37767	-1.60078	-0.833039	-0.0856818	0.616847	1.25298	1.81528	2.28806	2.66184	2.93797	3.11515	3.1984	3.19747	3.12306	2.98942	2.80902	2.59663	2.36699
	25	-2.08559	-2.38886	-2.71415	-3.05809	-3.41616	-3.78962	-4.17245	-4.55753	-4.9438	-5.32008	-5.68344	-6.02325	-6.32882	-6.59442	-6.8084	-6.96043	-7.04319	-7.04723	-6.96624	-6.79397	-6.52756	-6.16898	-5.71644	-5.17756	-4.56531	-3.88459	-3.15418	-2.39653	-1.62212	-0.860691	-0.12375	0.564211	1.18181	1.72155	2.16812	2.51256	2.75625	2.89842	2.94473	2.90482	2.7899	2.61476	2.39162	2.13571	1.86226
	26	-2.1198	-2.42198	-2.7468	-3.09082	-3.44946	-3.82387	-4.2079	-4.59429	-4.98185	-5.35927	-5.72346	-6.0637	-6.36918	-6.63411	-6.84681	-6.99698	-7.07735	-7.07858	-6.99454	-6.81914	-6.54976	-6.18862	-5.73411	-5.19409	-4.5817	-3.90194	-3.17368	-2.41934	-1.64937	-0.893349	-0.162708	0.518249	1.12832	1.66002	2.0981	2.43361	2.66767	2.79931	2.83396	2.78072	2.6505	2.45782	2.21437	1.93528	1.63584
	27	-2.14049	-2.43942	-2.76124	-3.1025	-3.45857	-3.83055	-4.21226	-4.59641	-4.98176	-5.357	-5.71902	-6.05711	-6.36054	-6.62353	-6.83453	-6.98334	-7.06279	-7.06371	-6.9801	-6.80598	-6.53882	-6.18086	-5.73052	-5.19553	-4.58884	-3.91526	-3.19328	-2.44492	-1.68027	-0.928428	-0.200492	0.479572	1.09074	1.62558	2.0687	2.41076	2.65247	2.79215	2.83437	2.78747	2.66144	2.46996	2.22406	1.93833	1.62783
	28	-2.15278	-2.44759	-2.7653	-3.10245	-3.45444	-3.82231	-4.1999	-4.57998	-4.96129	-5.33262	-5.69089	-6.02551	-6.32587	-6.5863	-6.79539	-6.94312	-7.02247	-7.02439	-6.94299	-6.77238	-6.51002	-6.15805	-5.7148	-5.18771	-4.58933	-3.92413	-3.21003	-2.46845	-1.70897	-0.960075	-0.232425	0.450407	1.06755	1.61165	2.06705	2.42388	2.68235	2.83986	2.89986	2.86987	2.75868	2.57896	2.34101	2.05869	1.74671
	29	-2.16019	-2.45133	-2.76525	-3.09853	-3.44659	-3.81041	-4.18392	-4.55993	-4.93719	-5.30461	-5.65915	-5.99036	-6.28776	-6.54578	-6.75319	-6.9001	-6.97962	-6.98283	-6.90388	-6.73696	-6.47948	-6.13344	-5.69707	-5.17749	-4.58684	-3.92925	-3.22211	-2.48624	-1.73078	-0.98366	-0.255121	0.431593	1.05573	1.60997	2.07844	2.45073	2.72663	2.90267	2.98131	2.96935	2.87453	2.70857	2.48119	2.2056	1.89612
	30	-2.16418	-2.45308	-2.76469	-3.09558	-3.4412	-3.80251	-4.17347	-4.54694	-4.92167	-5.28665	-5.63887	-5.96796	-6.26353	-6.52009	-6.72649	-6.87293	-6.95261	-6.95667	-6.8793	-6.71473	-6.46033	-6.11801	-5.68591	-5.17097	-4.58507	-3.93212	-3.22916	-2.49669	-1.74353	-0.997285	-0.267949	0.421433	1.05017	1.61098	2.08782	2.46995	2.75689	2.94465	3.03508	3.03454	2.95012	2.79295	2.57244	2.30137	1.99386
	31	-2.16579	-2.45379	-2.76445	-3.09438	-3.439	-3.7993	-4.16922	-4.54165	-4.91536	-5.27934	-5.63062	-5.95885	-6.25368	-6.50963	-6.71562	-6.86188	-6.94162	-6.94603	-6.86931	-6.70569	-6.45254	-6.11173	-5.68137	-5.16832	-4.58434	-3.93329	-3.23203	-2.50093	-1.74871	-1.00282	-0.273159	0.417311	1.04792	1.6114	2.09165	2.47778	2.76922	2.96176	3.05698	3.06108	2.98089	2.8273	2.60959	2.34036	2.03365
	32	-2.16611	-2.45393	-2.76441	-3.09414	-3.43857	-3.79866	-4.16839	-4.54061	-4.91412	-5.2779	-5.629	-5.95706	-6.25174	-6.50758	-6.71349	-6.85971	-6.93946	-6.94394	-6.86734	-6.70391	-6.45101	-6.1105	-5.68048	-5.1678	-4.5842	-3.93351	-3.2326	-2.50177	-1.74973	-1.00391	-0.274182	0.416501	1.04748	1.61148	2.0924	2.47932	2.77165	2.96512	3.06128	3.06629	2.98693	2.83405	2.61688	2.34802	2.04147
	33	-2.16611	-2.45393	-2.76441	-3.09414	-3.43857	-3.79866	-4.16838	-4.54061	-4.91411	-5.2779	-5.62899	-5.95705	-6.25173	-6.50757	-6.71347	-6.8597	-6.93945	-6.94393	-6.86733	-6.7039	-6.451	-6.11049	-5.68047	-5.16779	-4.5842	-3.93352	-3.2326	-2.50177	-1.74973	-1.00391	-0.274188	0.416497	1.04747	1.61149	2.0924	2.47933	2.77166	2.96513	3.06131	3.06632	2.98697	2.83409	2.61692	2.34806	2.04151
	34	-2.16611	-2.45393	-2.76441	-3.09414	-3.43857	-3.79866	-4.16838	-4.54061	-4.91411	-5.2779	-5.62899	-5.95705	-6.25173	-6.50757	-6.71347	-6.8597	-6.93945	-6.94393	-6.86733	-6.7039	-6.451	-6.11049	-5.68047	-5.16779	-4.5842	-3.93352	-3.2326	-2.50177	-1.74973	-1.00391	-0.274188	0.416497	1.04747	1.61149	2.0924	2.47933	2.77166	2.96513	3.06131	3.06632	2.98697	2.83409	2.61692	2.34806	2.04151
	35	-2.16611	-2.45393	-2.76441	-3.09414	-3.43857	-3.79866	-4.16838	-4.54061	-4.91411	-5.2779	-5.62899	-5.95705	-6.25173	-6.50757	-6.71347	-6.8597	-6.93945	-6.94393	-6.86733	-6.7039	-6.451	-6.11049	-5.68047	-5.16779	-4.5842	-3.93352	-3.2326	-2.50177	-1.74973	-1.00391	-0.274188	0.416497	1.04747	1.61149	2.0924	2.47933	2.77166	2.96513	3.06131	3.06632	2.98697	2.83409	2.61692	2.34806	2.04151

## Sheet: Table S6. CO2 flux values
Table S6. Raw data of the respiration rates (Rs) at each measured incubation temperature for each sampled soil.
aTotal refers to the Rs measured from the soils with added glucose solution.
bSOM refers to the Rs measured from the control soils with only water added.
cGlucose refers to the Rs measured from the added glucose only (i.e., total minus SOM Rs rates).
ID	Incubation temperature (°C)	Totala Rs (µg C g-1 h-1)	SOMb Rs (µg C g-1 h-1)	Glucosec Rs (µg C g-1 h-1)
BAZIZ	8.12522	4.67682	0.0370056	4.63981
BAZIZ	10.6751	5.76541	0.810993	4.95442
BAZIZ	13.2249	8.46542	0.864007	7.60141
BAZIZ	15.7747	9.08899	1.40039	7.6886
BAZIZ	18.3245	12.7285	2.07113	10.6574
BAZIZ	20.8744	14.3869	2.71653	11.6703
BAZIZ	23.4242	18.4609	3.39778	15.0631
BAZIZ	25.974	17.7624	3.74224	14.0202
BAZIZ	28.5239	20.933	5.03283	15.9002
BAZIZ	31.0737	23.4524	5.42012	18.0323
BAZIZ	33.6235	20.0011	6.56973	13.4313
BAZIZ	36.1734	23.3196	8.15582	15.1638
BAZIZ	38.7232	21.8758	8.26099	13.6148
BAZIZ	41.273	22.4895	9.57175	12.9177
BAZIZ	43.8229	21.2686	13.1798	8.08872
BAZIZ	46.3727	21.1394	11.1799	9.95956
BAZIZ	48.9225	22.9695	12.6038	10.3657
BAZIZ	51.4723	28.5732	19.5028	9.07038
BODOT	6.85296	5.79771	1.13917	4.65854
BODOT	9.46923	7.48526	1.383	6.10226
BODOT	12.0855	9.57988	1.57042	8.00946
BODOT	14.7018	10.7534	1.89814	8.8553
BODOT	17.318	13.3452	2.41852	10.9267
BODOT	19.9343	15.4412	2.533	12.9082
BODOT	22.5506	18.4077	3.31059	15.0971
BODOT	25.1669	19.7976	3.95584	15.8418
BODOT	27.7831	22.2025	4.94344	17.2591
BODOT	30.3994	21.6214	5.53049	16.0909
BODOT	33.0157	26.2148	6.42087	19.7939
BODOT	35.632	29.1196	7.49379	21.6258
BODOT	38.2482	25.7206	8.86147	16.8591
BODOT	40.8645	28.1716	10.2645	17.9071
BODOT	43.4808	25.9795	11.4158	14.5638
BODOT	46.097	23.8815	12.2166	11.6649
BODOT	48.7133	23.7146	12.5367	11.1779
BODOT	51.3296	30.4274	18.0825	12.3449
DAFOB	6.85277	2.5338	0.643237	1.89056
DAFOB	9.44432	3.01852	0.700051	2.31847
DAFOB	12.0359	3.7808	0.754371	3.02643
DAFOB	14.6274	4.81355	0.862174	3.95138
DAFOB	17.219	5.84445	0.964673	4.87978
DAFOB	19.8105	6.59829	1.15785	5.44044
DAFOB	22.4021	1.17925
DAFOB	24.9936	9.0296	1.43231	7.5973
DAFOB	27.5852	10.5745	1.68938	8.88508
DAFOB	30.1767	11.1246	1.86753	9.25705
DAFOB	32.7683	12.6004	2.15589	10.4445
DAFOB	35.3599	12.8987	2.79776	10.101
DAFOB	37.9514	11.4897	3.04626	8.44347
DAFOB	40.543	12.3086	4.38237	7.92628
DAFOB	43.1345	10.6517	4.68702	5.96465
DAFOB	45.7261	9.57731	3.34423	6.23308
DAFOB	48.3176	8.64519	4.9493	3.69589
DAFOB	50.9092	9.98715	5.63313	4.35402
DIZAF	8.16867	4.86867	1.42656	3.44211
DIZAF	10.3809	5.59205	1.49436	4.09769
DIZAF	12.5932	5.96092	1.65893	4.30199
DIZAF	14.8054	7.40791	2.00692	5.40099
DIZAF	17.0177	9.5123	2.09052	7.42178
DIZAF	19.2299	10.6852	2.91696	7.76828
DIZAF	22.5483	13.6094	3.58172	10.0277
DIZAF	24.7605	16.2522	3.98813	12.2641
DIZAF	26.9728	17.2621	5.0339	12.2282
DIZAF	29.185	18.1394	5.35026	12.7892
DIZAF	31.3972	21.2949	6.00933	15.2856
DIZAF	33.6095	20.9421	7.31331	13.6287
DIZAF	35.8217	18.5699	7.57226	10.9976
DIZAF	38.034	17.7392	8.70359	9.03562
DIZAF	40.2462	18.5453	10.0566	8.48865
DIZAF	42.4585	18.6771	10.9943	7.68273
DIZAF	44.6707	16.1242	10.3447	5.77952
DIZAF	47.9891	14.1435	10.5153	3.62821
DIZAF	50.2013	12.0022	10.1505	1.85171
DIZAF	52.4136	9.50343	8.28656	1.21688
FIGIZ	6.00734	2.92691	0.601193	2.32572
FIGIZ	8.65752	4.00274	0.714334	3.28841
FIGIZ	11.3077	4.85509	0.916269	3.93882
FIGIZ	13.9579	6.2087	0.985417	5.22329
FIGIZ	16.6081	7.01199	1.10683	5.90516
FIGIZ	19.2582	8.80558	1.28579	7.51978
FIGIZ	21.9084	10.4785	1.49111	8.9874
FIGIZ	24.5586	11.6875	1.75221	9.93529
FIGIZ	27.2088	13.518	1.85985	11.6582
FIGIZ	29.8589	14.9277	2.73386	12.1939
FIGIZ	32.5091	15.2152	3.02797	12.1872
FIGIZ	35.1593	15.4408	3.72574	11.715
FIGIZ	37.8095	12.9871	4.39613	8.59097
FIGIZ	40.4597	13.2127	5.87902	7.33368
FIGIZ	43.1098	14.2025	5.65966	8.54285
FIGIZ	45.76	12.9881	6.20645	6.78162
FIGIZ	48.4102	11.1913	6.32918	4.86211
FIGIZ	51.0604	10.8664	7.38257	3.48384
FODAF	8.36517	6.13236	1.37861	4.75375
FODAF	10.9055	7.40348	1.57859	5.82489
FODAF	13.4459	9.8967	2.01496	7.88174
FODAF	15.9862	10.9295	2.45414	8.47533
FODAF	18.5266	14.2817	2.96255	11.3192
FODAF	21.067	16.6779	3.40695	13.2709
FODAF	23.6073	17.5918	4.24234	13.3495
FODAF	26.1477	22.8294	4.87859	17.9508
FODAF	28.6881	25.0934	5.85535	19.238
FODAF	31.2284	26.6322	7.20044	19.4318
FODAF	33.7688	27.3903	8.07338	19.3169
FODAF	36.3091	30.6762	10.0022	20.6739
FODAF	38.8495	30.8572	11.9067	18.9505
FODAF	41.3899	29.5763	13.7052	15.8711
FODAF	43.9302	29.3089	16.3196	12.9893
FODAF	46.4706	29.8398	16.8998	12.9399
FODAF	49.0109	29.983	18.5314	11.4516
FODAF	51.5513	35.8631	22.8323	13.0308
FUHAS	7.97176	7.04661	3.312	3.73461
FUHAS	10.5657	9.67679	3.66372	6.01307
FUHAS	13.1597	10.0637	4.27972	5.78396
FUHAS	15.7536	12.4816	5.02139	7.46021
FUHAS	18.3476	14.1675	5.83514	8.33233
FUHAS	20.9416	18.3385	6.28409	12.0545
FUHAS	23.5355	20.6574	7.54037	13.117
FUHAS	26.1295	22.7371	8.4922	14.2449
FUHAS	28.7234	25.0381	10.1706	14.8676
FUHAS	31.3174	27.8436	11.9399	15.9037
FUHAS	33.9114	29.4399	13.5658	15.8741
FUHAS	36.5053	30.262	15.7014	14.5606
FUHAS	39.0993	31.1234	18.1447	12.9787
FUHAS	41.6932	32.787	22.1043	10.6827
FUHAS	44.2872	33.599	23.0188	10.5802
FUHAS	46.8811	33.9186	24.0669	9.85171
FUHAS	49.4751	34.9583	28.0425	6.91581
FUHAS	52.0691	41.5438	35.7668	5.77696
GAPIL	9.11058	7.58284	2.92469	4.65815
GAPIL	11.5591	10.2087	3.19025	7.0185
GAPIL	14.0075	11.9591	3.92816	8.03093
GAPIL	16.456	14.9995	4.52147	10.478
GAPIL	18.9045	16.8103	4.82021	11.9901
GAPIL	21.353	20.0331	5.34638	14.6867
GAPIL	23.8015	22.0361	6.12517	15.9109
GAPIL	26.25	27.9968	7.03399	20.9628
GAPIL	28.6984	27.2071	8.18435	19.0227
GAPIL	31.1469	28.1073	8.8309	19.2764
GAPIL	33.5954	28.2006	10.6507	17.55
GAPIL	36.0439	30.9263	12.7188	18.2075
GAPIL	38.4924	34.0227	13.4884	20.5343
GAPIL	40.9408	30.3819	16.633	13.749
GAPIL	43.3893	34.4737	17.9779	16.4958
GAPIL	45.8378	32.7963	20.9704	11.8259
GAPIL	48.2863	29.142	18.004	11.138
GAPIL	50.7348	25.5099	19.342	6.16798
GIGPA	7.1357	2.42284	0.627123	1.79572
GIGPA	9.73333	3.28209	0.767176	2.51491
GIGPA	12.331	3.88093	0.788671	3.09226
GIGPA	14.9286	5.07342	0.90367	4.16975
GIGPA	17.5262	5.92943	0.962843	4.96659
GIGPA	20.1239	7.26757	1.19711	6.07046
GIGPA	22.7215	8.55454	1.49166	7.06288
GIGPA	25.3191	10.4862	1.42289	9.06327
GIGPA	27.9168	10.5461	1.57642	8.96968
GIGPA	30.5144	13.4612	2.14799	11.3132
GIGPA	33.112	13.1245	2.42375	10.7008
GIGPA	35.7097	13.5608	3.07983	10.4809
GIGPA	38.3073	11.5741	3.37292	8.20115
GIGPA	40.9049	11.4738	4.35711	7.1167
GIGPA	43.5026	10.2564	4.42643	5.82994
GIGPA	46.1002	10.2838	4.88547	5.39831
GIGPA	48.6978	8.39048	4.83584	3.55464
GIGPA	51.2955	7.91953	5.40743	2.51211
HADIV	8.40805	3.9359	1.72879	2.20711
HADIV	10.9348	4.84261	2.01878	2.82383
HADIV	13.4616	6.34139	2.27199	4.06939
HADIV	15.9884	7.44488	2.66009	4.78479
HADIV	18.5152	8.49248	3.05405	5.43843
HADIV	21.042	10.7781	3.40918	7.36894
HADIV	23.5688	12.8476	4.41341	8.43417
HADIV	26.0956	14.9226	4.66081	10.2618
HADIV	28.6224	15.9194	5.51295	10.4065
HADIV	31.1492	18.3217	6.77531	11.5464
HADIV	33.676	18.5992	6.90927	11.69
HADIV	36.2027	20.624	8.60779	12.0162
HADIV	38.7295	19.3883	8.81293	10.5754
HADIV	41.2563	19.4635	11.3377	8.12579
HADIV	43.7831	18.7594	12.411	6.3484
HADIV	46.3099	19.2251	12.6803	6.54482
HADIV	48.8367	10.682	14.2958
HADIV	51.3635	23.334	16.6472	6.6868
HIHAK	8.07766	5.23954	1.46377	3.77577
HIHAK	10.6348	6.82246	1.71919	5.10327
HIHAK	13.1919	8.66862	2.19857	6.47004
HIHAK	15.7491	10.9745	2.52919	8.44534
HIHAK	18.3062	12.5274	3.27541	9.252
HIHAK	20.8634	15.1917	4.42943	10.7623
HIHAK	23.4205	16.6964	4.70206	11.9943
HIHAK	25.9776	19.0747	5.45481	13.6199
HIHAK	28.5348	21.9088	5.13275	16.7761
HIHAK	31.0919	23.5931	7.02165	16.5715
HIHAK	33.649	25.8762	8.39443	17.4817
HIHAK	36.2062	27.0281	9.74761	17.2805
HIHAK	38.7633	28.4386	12.0597	16.3789
HIHAK	41.3205	28.5807	12.5463	16.0344
HIHAK	43.8776	28.2964	12.9128	15.3836
HIHAK	46.4347	30.8967	15.0698	15.8269
HIHAK	48.9919	35.0459	15.4652	19.5807
HIHAK	51.549	41.7398	22.1428	19.597
JALAM	7.77628	4.89547	2.19347	2.702
JALAM	8.88214	4.92506	2.37804	2.54702
JALAM	9.988	5.18394	2.42036	2.76358
JALAM	11.0939	5.4587	2.56509	2.8936
JALAM	12.1997	6.13174	3.0952	3.03654
JALAM	13.3056	7.06029	2.39878	4.66151
JALAM	14.4114	7.36983	2.75784	4.61199
JALAM	15.5173	7.72029	3.35823	4.36206
JALAM	16.6231	9.10724	3.75083	5.35641
JALAM	17.729	9.38562	3.8485	5.53712
JALAM	18.8349	10.689	4.37676	6.31226
JALAM	19.9407	12.3879	4.98235	7.40555
JALAM	21.0466	11.5927	5.33389	6.25883
JALAM	23.2583	12.42	6.05761	6.36236
JALAM	24.3641	15.1249	6.19268	8.9322
JALAM	25.47	16.1384	6.53488	9.60351
JALAM	26.5759	17.148	6.74426	10.4038
JALAM	27.6817	17.2192	7.29891	9.92033
JALAM	28.7876	19.1041	7.92765	11.1764
JALAM	29.8934	19.8494	8.18795	11.6615
JALAM	30.9993	19.4563	9.27192	10.1844
JALAM	32.1051	18.9538	10.2293	8.72449
JALAM	33.211	22.3168	10.0576	12.2592
JALAM	34.3169	21.3646	11.1002	10.2643
JALAM	35.4227	21.5612	11.2572	10.304
JALAM	36.5286	22.753	10.9534	11.7996
JALAM	38.7403	20.9377	12.1997	8.73797
JALAM	39.8461	24.3579	12.7982	11.5597
JALAM	40.952	21.4261	12.2104	9.21571
JALAM	42.0579	21.7119	12.431	9.28085
JALAM	43.1637	21.5655	13.1199	8.44558
JALAM	44.2696	21.1495	12.5688	8.58068
JALAM	45.3754	9.41485	13.8003	-4.38546
JALAM	46.4813	19.3725	13.0008	6.37167
JALAM	48.693	18.643	13.8027	4.84029
JALAM	49.7989	17.4812	13.6464	3.83488
JALAM	50.9047	16.7648	13.3111	3.45372
JALAM	52.0106	16.83	14.7143	2.11567
JALAM	53.1164	18.47	15.4637	3.00628
JALAM	54.2223	19.5121	15.6112	3.90089
JOBAS	8.3607	4.59469	1.31432	3.28036
JOBAS	10.5655	5.93986	1.55843	4.38143
JOBAS	12.7704	8.32326	1.78116	6.5421
JOBAS	14.9752	9.59181	2.1836	7.40822
JOBAS	17.1801	10.9436	2.5958	8.34782
JOBAS	19.3849	13.3944	2.79782	10.5966
JOBAS	22.6922	15.5714	3.70132	11.8701
JOBAS	24.897	18.3699	4.10105	14.2689
JOBAS	27.1019	21.3589	4.50482	16.8541
JOBAS	29.3067	20.94	4.74253	16.1975
JOBAS	31.5116	23.0129	5.96734	17.0455
JOBAS	33.7164	23.0187	6.80981	16.2089
JOBAS	35.9212	23.0022	7.23252	15.7697
JOBAS	38.1261	23.0406	9.06773	13.9728
JOBAS	40.3309	20.5059	9.01954	11.4864
JOBAS	42.5358	17.3291	9.88788	7.44125
JOBAS	44.7406	15.7737	8.52215	7.25153
JOBAS	48.0479	11.7594	8.21817	3.5412
JOBAS	50.2527	12.9935	8.61464	4.37883
JOBAS	52.4576	16.9958	12.6011	4.39468
JUBIF	7.28202	2.91712	0.885617	2.03151
JUBIF	9.87567	3.45527	0.940555	2.51471
JUBIF	12.4693	4.77158	1.12357	3.64801
JUBIF	15.063	5.4976	1.19867	4.29893
JUBIF	17.6566	6.65572	1.48547	5.17024
JUBIF	20.2503	7.98515	1.58198	6.40317
JUBIF	22.8439	8.83026	1.67501	7.15525
JUBIF	25.4376	10.6911	1.9899	8.70116
JUBIF	28.0312	11.7266	2.3355	9.39114
JUBIF	30.6249	12.572	2.83278	9.73926
JUBIF	33.2186	12.2101	3.09791	9.11214
JUBIF	35.8122	13.7516	3.44881	10.3028
JUBIF	38.4059	14.4653	4.22773	10.2375
JUBIF	40.9995	14.2809	5.21056	9.07031
JUBIF	43.5932	13.2906	6.08819	7.2024
JUBIF	46.1868	11.5083	6.06663	5.44169
JUBIF	48.7805	15.8196	7.20752	8.61207
JUBIF	51.3741	20.0778	10.6068	9.47102
KAKIG	7.90169	3.98791	2.26317	1.72474
KAKIG	10.4071	5.69809
KAKIG	12.9125	5.99772	2.78955	3.20817
KAKIG	15.4179	8.64306	3.58209	5.06097
KAKIG	17.9233	9.82203	4.10075	5.72128
KAKIG	20.4287		4.0368
KAKIG	22.9341	13.7553	4.92166	8.83367
KAKIG	25.4395	15.8126	5.22532	10.5873
KAKIG	27.9449	18.5226	7.22699	11.2956
KAKIG	30.4504	19.0293	7.9193	11.11
KAKIG	32.9558	21.2782	8.86578	12.4124
KAKIG	35.4612	23.5666
KAKIG	37.9666	23.6251	10.9241	12.7011
KAKIG	40.472	21.8805	12.2964	9.58407
KAKIG	42.9774	21.7889	13.3833	8.40564
KAKIG	45.4828	21.5922	14.0134	7.57877
KAKIG	47.9882	22.7384
KAKIG	50.4936	29.0355	21.9924	7.04316
KILOR	7.7297	4.52227	2.64788	1.87438
KILOR	10.0037	5.21501	2.75415	2.46086
KILOR	12.2777	5.81266	2.72115	3.09151
KILOR	14.5517	6.96204	2.78165	4.1804
KILOR	16.8258	6.22437	3.19838	3.02599
KILOR	19.0998	8.93109	3.24366	5.68743
KILOR	21.3738	10.111	3.75134	6.35963
KILOR	24.7848	12.0077	4.28836	7.71939
KILOR	27.0588	14.0184	4.35966	9.65879
KILOR	29.3328	15.7659	5.44923	10.3167
KILOR	31.6069	15.3112	5.39211	9.91905
KILOR	33.8809	15.4837	5.87389	9.60981
KILOR	36.1549	12.4818	6.77088	5.71092
KILOR	40.7029	15.2947	8.35976	6.93498
KILOR	42.9769	15.6229	9.28621	6.33672
KILOR	45.251	16.1255	9.65251	6.47297
KILOR	47.525	23.854	12.4859	11.3681
KILOR	50.936	24.8822	19.3891	5.49316
KILOR	53.21	42.9073	21.1483	21.759
KILOR	55.484	52.7883	27.3838	25.4045
KOFIF	6.95468	7.62213	0.870729	6.75141
KOFIF	9.56229	10.5524	1.27918	9.27322
KOFIF	12.1699	13.0555	1.34241	11.713
KOFIF	14.7775	14.7821	1.47529	13.3068
KOFIF	17.3851	17.3587	1.98758	15.3711
KOFIF	19.9927	22.2104	2.26685	19.9436
KOFIF	22.6003	22.2478	2.68774	19.56
KOFIF	25.2079	25.5689	3.11072	22.4582
KOFIF	27.8155	28.5856	4.33397	24.2516
KOFIF	30.4232	28.5003	4.84045	23.6599
KOFIF	33.0308	30.9095	5.92239	24.9871
KOFIF	35.6384	31.9443	8.12187	23.8225
KOFIF	38.246	34.4805	9.40534	25.0751
KOFIF	40.8536	34.998	12.1988	22.7992
KOFIF	43.4612	35.9294	14.5688	21.3606
KOFIF	46.0688	31.6825	14.9296	16.7529
KOFIF	48.6764	25.5678	14.6491	10.9187
KOFIF	51.284	22.2729	12.8554	9.41751
MIJOZ	6.91032	3.61491	0.750973	2.86393
MIJOZ	9.57571	4.34909	0.821272	3.52781
MIJOZ	12.2411	5.1362	0.947285	4.18891
MIJOZ	14.9065	4.96021	1.04529	3.91492
MIJOZ	17.5719	8.94942	1.19941	7.75002
MIJOZ	20.2373	10.1477	1.40619	8.74147
MIJOZ	22.9027	13.8529	1.69585	12.157
MIJOZ	25.5681	13.5815	2.02956	11.5519
MIJOZ	28.2335	16.3744	2.68762	13.6868
MIJOZ	30.8988	16.4244	2.9147	13.5097
MIJOZ	33.5642	18.5132	3.54903	14.9642
MIJOZ	36.2296	18.6399	4.29327	14.3466
MIJOZ	38.895	16.9161	4.82721	12.0889
MIJOZ	41.5604	16.5925	6.2528	10.3397
MIJOZ	44.2258	16.1162	6.6774	9.43883
MIJOZ	46.8912	13.6684	7.05995	6.60841
MIJOZ	49.5566	10.444	6.27868	4.16529
MIJOZ	52.222	8.3652	6.09152	2.27368
MUFOV	6.47965	3.97538	0.76895	3.20643
MUFOV	9.11159	4.90583	0.870298	4.03553
MUFOV	11.7435	6.00416	0.971243	5.03291
MUFOV	14.3755	7.10176	1.09524	6.00653
MUFOV	17.0074	8.22511	1.30102	6.92409
MUFOV	19.6393	9.71587	1.42894	8.28692
MUFOV	22.2713	10.3338	1.79726	8.53654
MUFOV	24.9032	13.5482	1.94895	11.5992
MUFOV	27.5352	15.3042	2.26819	13.036
MUFOV	30.1671	17.1329	2.86045	14.2725
MUFOV	32.799	15.4497	3.26805	12.1816
MUFOV	35.431	17.7993	4.17411	13.6252
MUFOV	38.0629	15.8767	4.52837	11.3484
MUFOV	40.6948	17.5376	5.45448	12.0831
MUFOV	43.3268	17.6589	6.33323	11.3257
MUFOV	45.9587	14.8283	7.02934	7.79893
MUFOV	48.5907	13.6576	6.57833	7.07923
MUFOV	51.2226	11.5181	6.149	5.3691
NAVUV	5.8486	3.32387	1.22648	2.09738
NAVUV	8.55025	4.91414	1.34419	3.56995
NAVUV	11.2519	5.71334	1.6091	4.10424
NAVUV	13.9535	7.06011	1.82627	5.23384
NAVUV	16.6552	8.79859	1.96979	6.8288
NAVUV	19.3568	10.5145	2.33559	8.17891
NAVUV	22.0585	11.2402	2.63444	8.60574
NAVUV	24.7601	11.6908	2.59155	9.0993
NAVUV	27.4618	15.773	3.36771	12.4053
NAVUV	30.1634	17.1167	3.98527	13.1314
NAVUV	32.8651	16.6186	4.09132	12.5273
NAVUV	35.5667	17.4367	5.0529	12.3838
NAVUV	38.2684	18.1494	5.69331	12.4561
NAVUV	40.97	17.4649	7.10279	10.3621
NAVUV	43.6717	17.1104	8.23763	8.87277
NAVUV	46.3733	14.4665	8.03101	6.43548
NAVUV	49.075	12.407	7.99853	4.40851
NAVUV	51.7766	14.838	10.3551	4.48287
NUMIT	6.92141	3.04279	1.08924	1.95355
NUMIT	9.55268	4.19744	1.39625	2.80119
NUMIT	12.1839	3.71342	1.50518	2.20825
NUMIT	14.8152	5.08265	1.80772	3.27493
NUMIT	17.4465	5.02209	2.02484	2.99725
NUMIT	20.0778	6.33871	2.67419	3.66453
NUMIT	22.709	6.88991	2.77026	4.11965
NUMIT	25.3403	9.64986	2.77851	6.87135
NUMIT	27.9716	10.0027	4.02498	5.97772
NUMIT	30.6028	9.35927	3.26802	6.09125
NUMIT	33.2341	11.0612	4.32635	6.73484
NUMIT	35.8654	11.1944	5.42895	5.76549
NUMIT	38.4966	10.4936	7.21206	3.28158
NUMIT	41.1279	10.2011	6.85241	3.34871
NUMIT	43.7592	10.9993	8.36275	2.63651
NUMIT	46.3904	10.1249	6.51416	3.61077
NUMIT	49.0217	10.2768	7.60639	2.67038
NUMIT	51.653	11.2479	9.55793	1.68997
RURIH	8.86671	8.06832	4.02114	4.04718
RURIH	11.1407	9.95044	4.37566	5.57478
RURIH	13.4147	10.7554	4.54596	6.2094
RURIH	15.6888	13.2262	5.25172	7.97451
RURIH	17.9628	14.7006	5.25405	9.44653
RURIH	20.2368	16.7703	5.61133	11.159
RURIH	23.6478	18.5846	6.644	11.9406
RURIH	25.9218	22.6138	7.70193	14.9119
RURIH	28.1958	24.3669	8.54328	15.8236
RURIH	30.4699	26.7802	9.93796	16.8422
RURIH	32.7439	29.4131	13.8691	15.544
RURIH	35.0179	29.619	12.4147	17.2043
RURIH	37.2919	34.1676	14.1555	20.0122
RURIH	39.5659	34.808	15.9541	18.8539
RURIH	41.8399	30.9779	16.5832	14.3947
RURIH	44.1139	36.8692	18.3681	18.5011
RURIH	46.388	42.4843	19.3895	23.0949
RURIH	49.799	59.8869	26.8568	33.03
RURIH	52.073	67.6947	34.142	33.5527
RURIH	54.347	79.8325	43.567	36.2655
SUTUK	7.06255	3.20268	1.35218	1.85051
SUTUK	9.2748	4.09624	1.08323	3.01301
SUTUK	11.487	5.00553	1.24084	3.76468
SUTUK	13.6993	5.12235	1.4433	3.67905
SUTUK	15.9115	7.08738	1.56422	5.52316
SUTUK	18.1238	8.032	1.80949	6.2225
SUTUK	20.336	9.18138	2.09315	7.08823
SUTUK	23.6544	12.5043	2.56295	9.9414
SUTUK	25.8666	13.4264	2.67664	10.7498
SUTUK	28.0789	14.7206	3.27348	11.4471
SUTUK	30.2911	16.4907	3.6834	12.8073
SUTUK	32.5034	15.9697	3.94966	12.02
SUTUK	34.7156	17.1712	4.63375	12.5374
SUTUK	39.1401	15.2751	5.53486	9.74021
SUTUK	41.3523	16.295	6.66029	9.63469
SUTUK	43.5646	24.6411	7.95997	16.6812
SUTUK	45.7768	24.3507	10.2568	14.0939
SUTUK	49.0952	29.36	15.1809	14.1791
SUTUK	51.3074	39.5153	16.8552	22.6601
SUTUK	53.5197	41.9418	19.7571	22.1846
TIFOG	6.92741	2.2258	0.579039	1.64676
TIFOG	9.51352	3.33446	1.11888	2.21558
TIFOG	12.0996	4.19464	1.15532	3.03932
TIFOG	14.6857	6.01972	1.43172	4.588
TIFOG	17.2718	6.95302	1.58978	5.36324
TIFOG	19.8579	7.93943	1.8461	6.09333
TIFOG	22.4441	9.08795	2.22878	6.85917
TIFOG	25.0302	11.2478	2.40508	8.84273
TIFOG	27.6163	13.2617	2.73182	10.5298
TIFOG	30.2024	15.1785	3.14636	12.0322
TIFOG	32.7885	15.8706	3.74136	12.1292
TIFOG	35.3746	14.149	4.05255	10.0965
TIFOG	37.9607	15.74	4.83332	10.9067
TIFOG	40.5468	14.6892	6.06554	8.62362
TIFOG	43.1329	15.8779	6.73584	9.14208
TIFOG	45.719	13.4389	7.74462	5.69431
TIFOG	48.3051	12.8348	4.49932	8.33544
TIFOG	50.8912		10.5612
TUJIP	7.7297	7.02892	2.01718	5.01174
TUJIP	10.0037	7.99483	1.83774	6.15709
TUJIP	12.2777	11.5522	2.30282	9.24936
TUJIP	14.5517	11.025	2.84418	8.18078
TUJIP	16.8258	14.3364	3.28836	11.0481
TUJIP	19.0998	17.6307	3.67858	13.9521
TUJIP	21.3738	17.4013	3.83356	13.5678
TUJIP	24.7848	23.6668	5.27537	18.3914
TUJIP	27.0588	27.0223	6.66997	20.3523
TUJIP	29.3328	30.3136	7.69993	22.6137
TUJIP	31.6069	31.2443	8.50169	22.7426
TUJIP	33.8809	35.6684	9.52704	26.1413
TUJIP	36.1549	31.7548	10.7969	20.9579
TUJIP	40.7029	32.7613	14.2509	18.5104
TUJIP	42.9769	36.8141	15.0281	21.786
TUJIP	45.251	31.2134	17.6187	13.5947
TUJIP	47.525	32.1231	18.805	13.3181
TUJIP	50.936	43.3034	25.2553	18.0481
TUJIP	53.21	61.0426	35.45	25.5926
TUJIP	55.484	72.4955	51.1015	21.394
ZANUN	6.61791	3.97722	1.59738	2.37984
ZANUN	9.31494	4.87444	1.86561	3.00883
ZANUN	12.012	6.12974	2.43402	3.69572
ZANUN	14.709	8.2455	2.78224	5.46326
ZANUN	17.406	9.80108	2.99848	6.8026
ZANUN	20.1031	11.9926	3.77804	8.2146
ZANUN	22.8001	14.4874	4.42071	10.0667
ZANUN	25.4971	16.6746	5.11822	11.5564
ZANUN	28.1941	18.3734	6.68081	11.6926
ZANUN	30.8912	19.1838	7.331	11.8528
ZANUN	33.5882	21.32	8.52544	12.7946
ZANUN	36.2852	22.1604	9.44183	12.7186
ZANUN	38.9823	26.9923	11.2487	15.7436
ZANUN	41.6793	25.042	13.0643	11.9778
ZANUN	44.3763	23.2696	14.8418	8.42778
ZANUN	47.0733	22.125	14.1064	8.01851
ZANUN	49.7704	21.2787	14.2022	7.07642
ZANUN	52.4674	26.4012	19.0873	7.31381
ZAVIT	8.1294	5.20414	3.24011	1.96403
ZAVIT	10.7154	6.80745	3.6682	3.13925
ZAVIT	13.3013	8.87012	4.20317	4.66695
ZAVIT	15.8873	10.7115	4.80856	5.90292
ZAVIT	18.4732	12.5666	5.64947	6.91717
ZAVIT	21.0592	15.7164	6.45297	9.26341
ZAVIT	23.6452	18.0582	7.89798	10.1602
ZAVIT	26.2311	20.9599	8.75354	12.2064
ZAVIT	28.8171	23.1801	9.6982	13.4819
ZAVIT	31.403	24.1026	10.9753	13.1273
ZAVIT	33.989	25.1642	11.6337	13.5304
ZAVIT	36.575	29.0971	13.2963	15.8008
ZAVIT	39.1609	25.5857	14.0812	11.5045
ZAVIT	41.7469	27.9854	18.4859	9.49949
ZAVIT	44.3328	29.5487	18.9677	10.581
ZAVIT	46.9188	28.9412	20.1596	8.78166
ZAVIT	49.5048	34.6168	24.9059	9.71093
ZAVIT	52.0907	47.5825	32.3156	15.2669
ZOMIH	7.60856	4.14493	1.39429	2.75065
ZOMIH	10.1981	4.66634	1.55972	3.10663
ZOMIH	12.7876	5.92236	1.66072	4.26164
ZOMIH	15.3771	6.98775	1.98253	5.00522
ZOMIH	17.9666	8.22393	2.34191	5.88202
ZOMIH	20.5562	8.74672	3.26705	5.47967
ZOMIH	23.1457	11.123	4.01609	7.10691
ZOMIH	25.7352	12.23	4.08046	8.1495
ZOMIH	28.3247	11.4955	4.56645	6.92905
ZOMIH	30.9143	13.0074	5.02147	7.98593
ZOMIH	33.5038	15.2222	6.47673	8.74545
ZOMIH	36.0933	15.0197	6.99348	8.02625
ZOMIH	38.6828	16.1149	6.86545	9.24944
ZOMIH	41.2723	13.8172	7.822	5.99515
ZOMIH	43.8619	13.9088	7.82482	6.08394
ZOMIH	46.4514	13.1688	8.59126	4.57753
ZOMIH	49.0409	12.1891	9.41557	2.77354
ZOMIH	51.6304	12.4905	10.1834	2.30712
Geothermal15	5.31031	1.76155	1.22625	0.535294
Geothermal15	6.45342	1.7323	1.21942	0.512879
Geothermal15	7.59653	1.76033	1.1027	0.657631
Geothermal15	8.73965	1.78188	1.06028	0.721603
Geothermal15	9.88276	1.79045	1.108	0.682455
Geothermal15	11.0259	1.98249	1.09632	0.886177
Geothermal15	12.169	2.00624	1.09802	0.908219
Geothermal15	13.3121	2.1883	1.17737	1.01093
Geothermal15	14.4552	2.40193	1.20869	1.19324
Geothermal15	15.5983	2.63003	1.25088	1.37915
Geothermal15	16.7414	3.3226	0.840304	2.48229
Geothermal15	17.8846	3.39651	1.51597	1.88054
Geothermal15	19.0277	3.59872	1.54215	2.05658
Geothermal15	21.3139	3.90204	1.59438	2.30765
Geothermal15	22.457	4.18395	1.71404	2.46991
Geothermal15	23.6001	4.30817	1.87142	2.43675
Geothermal15	24.7432	4.8702	1.90743	2.96277
Geothermal15	25.8863	5.15232	2.0053	3.14702
Geothermal15	27.0295	5.72039	2.10317	3.61722
Geothermal15	28.1726	6.06413	2.37328	3.69085
Geothermal15	29.3157	6.98478	2.69102	4.29377
Geothermal15	30.4588	7.33248	2.93936	4.39312
Geothermal15	31.6019	8.36146	2.95357	5.40789
Geothermal15	32.745	8.55336	3.44483	5.10853
Geothermal15	33.8881	8.62082	3.12711	5.49371
Geothermal15	35.0313	9.16837	3.32979	5.83857
Geothermal15	37.3175	9.65078	3.4249	6.22588
Geothermal15	38.4606	9.27266	4.13601	5.13664
Geothermal15	39.6037	9.32345	3.96335	5.3601
Geothermal15	40.7468	9.9952	4.19891	5.79629
Geothermal15	41.8899	10.2203	4.72452	5.49577
Geothermal15	43.033	9.68458	4.78468	4.8999
Geothermal15	44.1762	8.7239	5.19707	3.52683
Geothermal15	45.3193	8.31127	5.52359	2.78768
Geothermal15	47.6055	8.14199	6.28168	1.86031
Geothermal15	48.7486	8.40975	6.03118	2.37858
Geothermal15	49.8917	8.10344	6.42322	1.68022
Geothermal15	51.0348	7.76857	6.02668	1.74189
Geothermal15	52.178	7.20146	5.93229	1.26917
Geothermal15	53.3211	6.74765	5.78866	0.958996
Geothermal295	4.41085	3.87219	1.50463	2.36755
Geothermal295	5.57135	4.91132	0.524772	4.38655
Geothermal295	6.73184	5.42452	0.6617	4.76282
Geothermal295	7.89233	6.03592	1.69495	4.34097
Geothermal295	9.05283	6.94026	1.70474	5.23552
Geothermal295	10.2133	8.24235	1.77993	6.46242
Geothermal295	11.3738	7.46173	1.81936	5.64237
Geothermal295	12.5343	10.0122	2.08478	7.92738
Geothermal295	13.6948	11.1165	2.18368	8.93278
Geothermal295	14.8553	12.2109	2.24731	9.96359
Geothermal295	16.0158	13.8281	2.99109	10.837
Geothermal295	17.1763	14.6876	3.54918	11.1384
Geothermal295	18.3368	16.2703	3.44519	12.8251
Geothermal295	20.6578	17.2563	3.79894	13.4573
Geothermal295	21.8182	17.5608	4.76065	12.8001
Geothermal295	22.9787	20.1615	5.22272	14.9388
Geothermal295	24.1392	21.7424	5.2945	16.4479
Geothermal295	25.2997	23.7616	5.38674	18.3748
Geothermal295	26.4602	21.6809	6.1296	15.5513
Geothermal295	27.6207	24.3348	7.47356	16.8613
Geothermal295	28.7812	25.9204	8.40267	17.5178
Geothermal295	29.9417	30.112	9.1631	20.9489
Geothermal295	31.1022	28.9288	8.81706	20.1118
Geothermal295	32.2627	33.835	10.16	23.675
Geothermal295	33.4232	33.565	11.2987	22.2663
Geothermal295	34.5837	36.2088	12.2103	23.9985
Geothermal295	36.9047	35.4175	15.7305	19.687
Geothermal295	38.0652	37.3675	13.5352	23.8323
Geothermal295	39.2256	33.4196	14.7834	18.6362
Geothermal295	40.3861	36.4641	16.3529	20.1111
Geothermal295	41.5466	35.9551	18.1355	17.8196
Geothermal295	42.7071	38.0102	19.3112	18.699
Geothermal295	43.8676	35.1107	21.2833	13.8275
Geothermal295	45.0281	37.2711	22.1456	15.1255
Geothermal295	47.3491	33.7621	23.1768	10.5853
Geothermal295	48.5096	33.1586	22.7321	10.4265
Geothermal295	49.6701	27.4174	21.5859	5.83155
Geothermal295	50.8306	24.0164	18.471	5.54539
Geothermal295	51.9911	20.7137	18.1453	2.56838
Geothermal295	53.1516	18.72	15.9617	2.75836
Geothermal40	5.31526	2.05922	1.39584	0.663377
Geothermal40	6.46451	2.14773	1.35414	0.79359
Geothermal40	7.61375	2.35401	1.35078	1.00323
Geothermal40	8.76299	2.47453	1.41662	1.05791
Geothermal40	9.91224	2.65111	1.35756	1.29355
Geothermal40	11.0615	2.85748	1.35114	1.50633
Geothermal40	12.2107	2.75513	1.47004	1.28509
Geothermal40	13.36	3.30639	1.37475	1.93164
Geothermal40	14.5092	3.63584	1.49886	2.13698
Geothermal40	15.6585	4.01463	1.52142	2.49322
Geothermal40	16.8077	4.72875	1.76839	2.96036
Geothermal40	17.9569	4.68888	1.81921	2.86967
Geothermal40	19.1062	5.53948	1.93354	3.60593
Geothermal40	21.4047	5.76597	2.25823	3.50773
Geothermal40	22.5539	6.21533	2.17666	4.03867
Geothermal40	23.7032	6.6784	2.37554	4.30286
Geothermal40	24.8524	7.37256	2.47786	4.8947
Geothermal40	26.0017	7.86125	2.65951	5.20174
Geothermal40	27.1509	9.20315	2.84994	6.35322
Geothermal40	28.3001	9.77273	2.87238	6.90035
Geothermal40	29.4494	10.5305	3.20476	7.32576
Geothermal40	30.5986	10.9249	3.62168	7.30324
Geothermal40	31.7479	12.0075	3.81812	8.18936
Geothermal40	32.8971	11.8007	3.931	7.86974
Geothermal40	34.0464	11.7282	4.16185	7.56631
Geothermal40	35.1956	13.3856	4.55249	8.83314
Geothermal40	37.4941	14.1942	4.63333	9.56089
Geothermal40	38.6433	14.7445	5.00104	9.74341
Geothermal40	39.7926	15.8025	5.42211	10.3804
Geothermal40	40.9418	18.4423	6.02249	12.4198
Geothermal40	42.0911	16.9237	6.32926	10.5944
Geothermal40	43.2403	15.874	6.74333	9.13069
Geothermal40	44.3896	15.8343	7.36852	8.46574
Geothermal40	45.5388	15.2172	7.94575	7.27142
Geothermal40	47.8373	14.134	8.2929	5.84114
Geothermal40	48.9865	13.6452	8.42437	5.22087
Geothermal40	50.1358	12.557	8.69414	3.86285
Geothermal40	51.285	12.5973	8.56244	4.03483
Geothermal40	52.4343	10.5568	8.04384	2.51297
Geothermal40	53.5835	9.77199	7.88423	1.88776
Geothermal1495	4.72507	3.77555	1.42082	2.35473
Geothermal1495	5.88636	3.77602	1.30768	2.46835
Geothermal1495	7.04765	4.08965	1.38147	2.70818
Geothermal1495	8.20894	4.50815	1.47154	3.03661
Geothermal1495	9.37022	5.55395	1.4824	4.07155
Geothermal1495	10.5315	5.65219	1.63716	4.01502
Geothermal1495	11.6928	6.14465	1.60789	4.53676
Geothermal1495	12.8541	6.72692	1.85059	4.87633
Geothermal1495	14.0154	7.49642	1.91852	5.57789
Geothermal1495	15.1767	8.3617	1.93249	6.42921
Geothermal1495	16.338	8.79428	2.21284	6.58143
Geothermal1495	17.4993	9.90112	2.33987	7.56125
Geothermal1495	18.6605	11.098	2.42196	8.676
Geothermal1495	20.9831	11.6091	2.60121	9.0079
Geothermal1495	22.1444	12.2259	3.10978	9.11614
Geothermal1495	23.3057	14.2362	3.08265	11.1536
Geothermal1495	24.467	12.9892	3.54674	9.4425
Geothermal1495	25.6283	14.8919	3.87462	11.0173
Geothermal1495	26.7896	17.252	4.23033	13.0216
Geothermal1495	27.9509	17.4662	4.43401	13.0322
Geothermal1495	29.1121	18.426	3.53238	14.8936
Geothermal1495	30.2734	20.5358	5.44394	15.0919
Geothermal1495	31.4347	19.9941	5.41147	14.5826
Geothermal1495	32.596	21.7271	5.96145	15.7656
Geothermal1495	33.7573	21.9521	6.71578	15.2363
Geothermal1495	34.9186	22.4675	7.2955	15.172
Geothermal1495	37.2412	23.2515	8.06889	15.1826
Geothermal1495	38.4025	25.7999	8.42203	17.3779
Geothermal1495	39.5638	25.0784	9.4364	15.642
Geothermal1495	40.725	24.4986	10.0488	14.4498
Geothermal1495	41.8863	24.5873	11.4336	13.1536
Geothermal1495	43.0476	25.7875	12.8876	12.8999
Geothermal1495	44.2089	26.7658	13.6243	13.1415
Geothermal1495	45.3702	24.6322	14.743	9.88929
Geothermal1495	47.6928	23.4758	14.5199	8.95591
Geothermal1495	48.8541	21.8131	15.7259	6.08724
Geothermal1495	50.0154	19.6307	14.7583	4.87243
Geothermal1495	51.1766	18.5787	13.6586	4.9201
Geothermal1495	52.3379	17.1306	13.1285	4.00204
Geothermal1495	53.4992	15.9954	12.424	3.57134
Geothermal305	6.08224	5.14394	2.05013	3.09381
Geothermal305	7.21431	5.11431	2.16333	2.95098
Geothermal305	8.34638	6.05953	2.30417	3.75536
Geothermal305	9.47844	6.42122	2.23357	4.18765
Geothermal305	10.6105	7.37742	2.63523	4.74219
Geothermal305	11.7426	8.03768	2.68052	5.35715
Geothermal305	12.8746	8.94746	2.87472	6.07274
Geothermal305	14.0067	9.1327	3.4415	5.6912
Geothermal305	15.1388	11.0634	3.48346	7.57991
Geothermal305	16.2708	12.5485	3.68983	8.85867
Geothermal305	17.4029	12.7417	4.22002	8.52167
Geothermal305	18.535	14.3737	4.99422	9.37947
Geothermal305	19.667	15.7877	4.59232	11.1954
Geothermal305	21.9312	18.3778	6.62136	11.7564
Geothermal305	23.0632	19.2607	7.16131	12.0994
Geothermal305	24.1953	21.0474	7.84829	13.1991
Geothermal305	25.3274	23.3859	9.51578	13.8701
Geothermal305	26.4594	23.4463	8.34746	15.0988
Geothermal305	27.5915	23.3035	9.235	14.0685
Geothermal305	28.7236	26.9883	10.5935	16.3948
Geothermal305	29.8556	28.1974	11.702	16.4954
Geothermal305	30.9877	29.8136	12.624	17.1896
Geothermal305	32.1198	26.18	12.9123	13.2677
Geothermal305	33.2518	32.7058	12.5607	20.1451
Geothermal305	34.3839	32.8107	15.1672	17.6435
Geothermal305	35.516	33.3446	15.9933	17.3514
Geothermal305	37.7801	34.4549	16.4227	18.0322
Geothermal305	38.9122	32.786	18.465	14.321
Geothermal305	40.0442	33.205	16.4766	16.7284
Geothermal305	41.1763	34.7323	19.6975	15.0348
Geothermal305	42.3084	34.1768	22.3007	11.8761
Geothermal305	43.4404	32.8398	23.1325	9.70732
Geothermal305	44.5725	31.6502	23.8468	7.80337
Geothermal305	45.7046	13.7891	22.9352	-9.14609
Geothermal305	47.9687	22.5802	19.8871	2.69314
Geothermal305	49.1008	21.0263	17.7763	3.25008
Geothermal305	50.2328	18.7783	15.6423	3.13599
Geothermal305	51.3649	16.2765	14.5013	1.77514
Geothermal305	52.497	15.137	12.9034	2.23361
Geothermal305	53.629	10.6917	12.2406
Geothermal50	6.06084	2.03515	1.00735	1.02781
Geothermal50	7.18251	2.14795	0.889478	1.25847
Geothermal50	8.30417	2.19019	1.03223	1.15796
Geothermal50	9.42584	2.45497	0.99588	1.45909
Geothermal50	10.5475	2.58656	1.01656	1.57
Geothermal50	11.6692	2.72096	0.993883	1.72708
Geothermal50	12.7908	2.93832	1.20707	1.73125
Geothermal50	13.9125	3.52843	1.23568	2.29274
Geothermal50	15.0342	3.93629	1.20392	2.73237
Geothermal50	16.1558	4.26174	1.29413	2.96761
Geothermal50	17.2775	4.98156	1.7709	3.21066
Geothermal50	18.3992	5.1268	1.77874	3.34807
Geothermal50	19.5208	5.77648	1.81734	3.95914
Geothermal50	21.7642	6.31415	2.20409	4.11006
Geothermal50	22.8858	7.60991	2.45345	5.15645
Geothermal50	24.0075	8.00411	2.76874	5.23537
Geothermal50	25.1291	8.76652	3.04107	5.72546
Geothermal50	26.2508	9.57	3.16838	6.40162
Geothermal50	27.3725	10.4736	3.23883	7.23473
Geothermal50	28.4941	11.1202	3.60626	7.51397
Geothermal50	29.6158	11.2406	4.09562	7.14501
Geothermal50	30.7375	13.2928	3.96772	9.32507
Geothermal50	31.8591	14.0442	4.21194	9.83224
Geothermal50	32.9808	14.5551	4.74608	9.80898
Geothermal50	34.1025	14.9798	4.89073	10.089
Geothermal50	35.2241	15.8833	5.59619	10.2872
Geothermal50	37.4675	16.4594	6.17357	10.2858
Geothermal50	38.5891	16.3682	7.05871	9.30946
Geothermal50	39.7108	15.8594	7.17902	8.68038
Geothermal50	40.8325	17.268	8.26455	9.0034
Geothermal50	41.9541	16.8819	7.92758	8.95434
Geothermal50	43.0758	16.1636	9.23235	6.93126
Geothermal50	44.1975	15.2155	9.37395	5.84153
Geothermal50	45.3191	14.2335	9.81333	4.42012
Geothermal50	47.5624	11.8957	9.27148	2.62422
Geothermal50	48.6841	11.7274	8.6713	3.05605
Geothermal50	49.8058	10.6438	7.02689	3.61688
Geothermal50	50.9274	9.82343	7.59278	2.23064
Geothermal50	52.0491	8.77819	7.35037	1.42783
Geothermal50	53.1708	8.36462	6.83832	1.5263
Geothermal25	6.03475	1.50294	0.785359	0.717584
Geothermal25	7.15857	1.18006	0.886295	0.29377
Geothermal25	8.28239	1.48174	0.78909	0.692648
Geothermal25	9.40621	1.55142	0.802344	0.749076
Geothermal25	10.53	1.68895	0.941722	0.747232
Geothermal25	11.6538	1.90033	0.97475	0.925578
Geothermal25	12.7777	1.99644	0.898337	1.09811
Geothermal25	13.9015	2.3042	0.90142	1.40278
Geothermal25	15.0253	2.35372	0.9758	1.37792
Geothermal25	16.1491	2.64778	0.942977	1.7048
Geothermal25	17.2729	3.10962	1.12806	1.98156
Geothermal25	18.3968	3.48223	1.25328	2.22895
Geothermal25	19.5206	3.82559	1.26119	2.5644
Geothermal25	21.7682	4.51264	1.35765	3.155
Geothermal25	22.892	4.78043	1.55522	3.2252
Geothermal25	24.0159	5.19301	1.61871	3.5743
Geothermal25	25.1397	5.58596	1.7094	3.87656
Geothermal25	26.2635	6.08999	1.94615	4.14385
Geothermal25	27.3873	6.31719	1.99063	4.32656
Geothermal25	28.5111	6.82409	2.1376	4.68649
Geothermal25	29.635	7.53819	2.4964	5.04179
Geothermal25	30.7588	8.62865	2.71727	5.91138
Geothermal25	31.8826	9.09042	2.79043	6.29999
Geothermal25	33.0064	8.76662	3.09019	5.67643
Geothermal25	34.1302	8.59299	3.55324	5.03976
Geothermal25	35.2541	9.72689	3.28184	6.44504
Geothermal25	37.5017	10.4541	4.0012	6.45289
Geothermal25	38.6255	10.9054	4.3158	6.58957
Geothermal25	39.7493	11.3927	4.26398	7.12868
Geothermal25	40.8732	10.6172	4.76345	5.85375
Geothermal25	41.997	11.3481	5.54815	5.79998
Geothermal25	43.1208	10.5398	5.69127	4.84851
Geothermal25	44.2446	9.84351	6.16984	3.67367
Geothermal25	45.3684	9.79514	6.83824	2.9569
Geothermal25	47.6161	9.11806	6.94805	2.17001
Geothermal25	48.7399	8.86931	6.6868	2.18251
Geothermal25	49.8637	7.78576	6.51919	1.26657
Geothermal25	50.9875	7.46883	5.90556	1.56327
Geothermal25	52.1114	6.87334	5.79218	1.08116
Geothermal25	53.2352	6.66327	5.19949	1.46379
Geothermal1505	5.16451	3.83708	1.25796	2.57912
Geothermal1505	6.31224	3.90591	1.08192	2.82398
Geothermal1505	7.45998	4.03161	1.17732	2.85429
Geothermal1505	8.60771	4.44751	1.2842	3.16331
Geothermal1505	9.75544	4.59869	1.30185	3.29685
Geothermal1505	10.9032	5.10884	1.45542	3.65342
Geothermal1505	12.0509	6.04344	1.42851	4.61493
Geothermal1505	13.1986	6.80992	1.61315	5.19677
Geothermal1505	14.3464	7.53212	1.59838	5.93374
Geothermal1505	15.4941	8.3066	1.7721	6.5345
Geothermal1505	16.6418	9.48547	2.54146	6.94401
Geothermal1505	17.7896	10.1576	2.49328	7.66429
Geothermal1505	18.9373	10.7009	2.45299	8.24789
Geothermal1505	21.2328	13.3676	2.67781	10.6898
Geothermal1505	22.3805	14.607	3.08029	11.5267
Geothermal1505	23.5282	14.438	3.15965	11.2784
Geothermal1505	24.6759	15.7386	3.70939	12.0292
Geothermal1505	25.8237	17.0551	3.84957	13.2056
Geothermal1505	26.9714	18.5245	4.10983	14.4146
Geothermal1505	28.1191	19.5879	4.62952	14.9583
Geothermal1505	29.2669	20.2559	4.84552	15.4104
Geothermal1505	30.4146	21.6738	5.66258	16.0112
Geothermal1505	31.5623	21.3497	5.54733	15.8024
Geothermal1505	32.7101	23.7517	6.86247	16.8892
Geothermal1505	33.8578	23.247	7.06198	16.185
Geothermal1505	35.0055	23.701	7.4938	16.2072
Geothermal1505	37.301	24.0706	8.75158	15.319
Geothermal1505	38.4487	25.3902	10.5105	14.8797
Geothermal1505	39.5965	25.3079	10.7987	14.5092
Geothermal1505	40.7442	25.7254	11.8253	13.9
Geothermal1505	41.8919	26.7533	13.9551	12.7982
Geothermal1505	43.0397	25.6847	14.1016	11.5831
Geothermal1505	44.1874	24.6028	14.6349	9.96784
Geothermal1505	45.3351	23.0773	14.1801	8.89724
Geothermal1505	47.6306	19.1539	13.6654	5.48841
Geothermal1505	48.7783	18.0898	12.3712	5.71864
Geothermal1505	49.926	16.5745	12.8158	3.75862
Geothermal1505	51.0738	16.1564	12.2991	3.85721
Geothermal1505	52.2215	14.0615	12.0166	2.04489
Geothermal1505	53.3692	13.0706	11.4315	1.63913
Geothermal350	5.25647	3.96688	2.27543	1.69145
Geothermal350	6.43963	4.13696	2.08006	2.0569
Geothermal350	7.62279	4.24604	2.36439	1.88165
Geothermal350	8.80596	4.64599	2.44992	2.19607
Geothermal350	9.98912	5.15603	2.42036	2.73567
Geothermal350	11.1723	5.20491	2.59442	2.6105
Geothermal350	12.3554	5.92321	2.69078	3.23243
Geothermal350	13.5386	1.67329	2.88134
Geothermal350	14.7218	6.79533	3.10025	3.69508
Geothermal350	15.9049	7.8979	3.51969	4.37821
Geothermal350	17.0881	8.60991	3.97195	4.63796
Geothermal350	18.2713	9.41122	4.19659	5.21463
Geothermal350	19.4544	9.00065	5.27253	3.72812
Geothermal350	21.8207	12.3204	5.43403	6.88633
Geothermal350	23.0039	10.391	5.89075	4.50023
Geothermal350	24.1871	13.7595	6.27787	7.48166
Geothermal350	25.3702	16.2951	6.65496	9.64019
Geothermal350	26.5534	16.6517	7.04352	9.60814
Geothermal350	27.7366	16.3783	7.76894	8.60934
Geothermal350	28.9197	17.6773	8.42276	9.25455
Geothermal350	30.1029	20.3537	8.90662	11.4471
Geothermal350	31.286	20.5023	11.1943	9.30799
Geothermal350	32.4692	23.4709	9.46507	14.0058
Geothermal350	33.6524	23.1888	10.4881	12.7007
Geothermal350	34.8355	22.6879	11.2698	11.4181
Geothermal350	36.0187	24.4661	11.5463	12.9198
Geothermal350	38.385	24.5841	14.1885	10.3956
Geothermal350	39.5682	25.1942	14.2746	10.9196
Geothermal350	40.7513	24.8115	15.2373	9.57421
Geothermal350	41.9345	25.9575	15.8363	10.1212
Geothermal350	43.1177	27.8299	16.8142	11.0157
Geothermal350	44.3008	26.9222	18.6138	8.30835
Geothermal350	45.484	27.6071	18.0027	9.60439
Geothermal350	46.6671	23.8244	18.1006	5.7238
Geothermal350	49.0335	20.7861	15.7741	5.01206
Geothermal350	50.2166	17.6428	15.2143	2.42845
Geothermal350	51.3998	15.9103	12.9758	2.93451
Geothermal350	52.583	13.5761	12.0634	1.51271
Geothermal350	53.7661	12.7651	10.3439	2.42125
Geothermal350	54.9493	10.6711	10.1178	0.5533
Geothermal1595	5.42255	2.47214	1.1651	1.30704
Geothermal1595	6.59896	2.53232	0.993288	1.53903
Geothermal1595	7.77538	2.74554	1.16805	1.57749
Geothermal1595	8.9518	2.86451	1.26215	1.60236
Geothermal1595	10.1282	3.02636	1.26967	1.75669
Geothermal1595	11.3046	3.73956	1.29799	2.44158
Geothermal1595	12.481	3.60372	1.39728	2.20644
Geothermal1595	13.6575	4.33241	1.47737	2.85504
Geothermal1595	14.8339	4.60296	1.49945	3.10351
Geothermal1595	16.0103	5.39218	1.81657	3.57561
Geothermal1595	17.1867	5.81375	1.93348	3.88027
Geothermal1595	18.3631	6.56364	1.99664	4.56701
Geothermal1595	19.5395	7.16122	2.3082	4.85302
Geothermal1595	21.8924	8.53127	2.65661	5.87466
Geothermal1595	23.0688	9.55425	2.79068	6.76357
Geothermal1595	24.2452	9.74175	2.98246	6.75928
Geothermal1595	25.4216	5.69932	3.21055	2.48877
Geothermal1595	26.598	11.2637	3.58434	7.67937
Geothermal1595	27.7744	11.1183	4.36454	6.75376
Geothermal1595	28.9509	13.1226	3.95723	9.16539
Geothermal1595	30.1273	13.8179	4.43833	9.37953
Geothermal1595	31.3037	13.5582	4.6457	8.91246
Geothermal1595	32.4801	14.7397	4.90352	9.83618
Geothermal1595	33.6565	14.8784	5.18728	9.69108
Geothermal1595	34.8329	15.434	5.97764	9.45632
Geothermal1595	36.0093	16.2841	5.95236	10.3318
Geothermal1595	38.3622	15.2802	7.24686	8.03329
Geothermal1595	39.5386	17.5273	7.73057	9.79674
Geothermal1595	40.715	17.3278	8.54949	8.7783
Geothermal1595	41.8914	17.6739	8.41149	9.26241
Geothermal1595	43.0678	17.3856	9.49321	7.89238
Geothermal1595	44.2443	18.2623	10.1645	8.09776
Geothermal1595	45.4207	17.1958	10.6543	6.54146
Geothermal1595	46.5971	16.243	10.6742	5.56875
Geothermal1595	48.9499	14.2294	10.6613	3.56806
Geothermal1595	50.1263	13.169	9.61315	3.55582
Geothermal1595	51.3027	11.833	9.74099	2.09196
Geothermal1595	52.4792	10.9533	8.47598	2.47731
Geothermal1595	53.6556	10.2186	8.32443	1.89421
Geothermal1595	54.832	9.1444	8.17762	0.966783
Geothermal150	5.95919	6.03129	2.50844	3.52285
Geothermal150	7.10678	5.86672	2.38174	3.48498
Geothermal150	8.25436	5.82343	2.49429	3.32914
Geothermal150	9.40194	5.57465	3.19779	2.37686
Geothermal150	10.5495	5.62435	2.91304	2.71131
Geothermal150	11.6971	7.36694	3.19939	4.16755
Geothermal150	12.8447	7.59984	2.94657	4.65327
Geothermal150	13.9923	6.08211	3.07762	3.00449
Geothermal150	15.1399	10.053	3.15722	6.89575
Geothermal150	16.2874	10.7803	3.21429	7.56601
Geothermal150	17.435	12.3896	3.75755	8.63201
Geothermal150	18.5826	9.49069	4.32075	5.16994
Geothermal150	19.7302	12.6974	4.50669	8.19068
Geothermal150	22.0254	13.8595	3.21662	10.6429
Geothermal150	23.1729	13.9403	5.02391	8.91639
Geothermal150	24.3205	14.6174	5.68942	8.92797
Geothermal150	25.4681	16.0273	5.64077	10.3866
Geothermal150	26.6157	19.6344	6.74218	12.8922
Geothermal150	27.7633	19.9975	7.00807	12.9894
Geothermal150	28.9109	20.4783	7.1099	13.3684
Geothermal150	30.0584	20.8164	8.08806	12.7283
Geothermal150	31.206	22.1611	8.66551	13.4956
Geothermal150	32.3536	20.2224	9.23964	10.9827
Geothermal150	33.5012	27.9473	9.5595	18.3878
Geothermal150	34.6488	21.5662	10.7861	10.7801
Geothermal150	35.7964	26.0862	9.79092	16.2953
Geothermal150	38.0915	28.9346	13.0187	15.9159
Geothermal150	39.2391	23.6305	13.6583	9.97221
Geothermal150	40.3867	31.5437	15.4427	16.101
Geothermal150	41.5343	30.4297	18.0048	12.4249
Geothermal150	42.6819	20.1002	20.1539
Geothermal150	43.8294	31.8254	19.7438	12.0815
Geothermal150	44.977	30.8902	21.71	9.18016
Geothermal150	46.1246	31.0986	22.7143	8.38422
Geothermal150	48.4198	24.3855	21.7264	2.65913
Geothermal150	49.5674	20.3244	17.6882	2.6362
Geothermal150	50.7149	17.9014	16.2749	1.62647
Geothermal150	51.8625	16.583	13.9535	2.62945
Geothermal150	53.0101	14.1519	13.2	0.951924
Geothermal150	54.1577	13.8552	11.9042	1.951
Geothermal65	5.40803	2.19798	1.51969	0.678289
Geothermal65	6.54083	2.31241	1.58985	0.722558
Geothermal65	7.67363	2.56625	1.59382	0.972426
Geothermal65	8.80642	2.80133	1.60338	1.19795
Geothermal65	9.93922	2.98289	1.66931	1.31357
Geothermal65	11.072	3.19434	1.82534	1.36901
Geothermal65	12.2048	3.52605	1.87638	1.64967
Geothermal65	13.3376	4.00442	1.93964	2.06478
Geothermal65	14.4704	4.28253	2.09085	2.19168
Geothermal65	15.6032	4.59527	1.51203	3.08324
Geothermal65	16.736	5.02535	2.33336	2.69199
Geothermal65	17.8688	5.72725	2.3486	3.37865
Geothermal65	19.0016	6.00353	2.47428	3.52926
Geothermal65	21.2672	7.14215	2.94988	4.19227
Geothermal65	22.4	7.72644	3.22758	4.49887
Geothermal65	23.5328	8.40754	3.57458	4.83297
Geothermal65	24.6656	9.49531	3.78966	5.70565
Geothermal65	25.7984	8.71008	4.38492	4.32516
Geothermal65	26.9312	10.5632	1.97956	8.58367
Geothermal65	28.064	10.9289	4.70215	6.22674
Geothermal65	29.1968	12.3578	5.01408	7.34376
Geothermal65	30.3296	13.0677	5.61606	7.45166
Geothermal65	31.4624	13.8735	6.09945	7.77402
Geothermal65	32.5952	15.6754	6.54906	9.12636
Geothermal65	33.728	15.1028	6.47643	8.62641
Geothermal65	34.8608	14.5232	6.72497	7.7982
Geothermal65	37.1264	15.9602	7.82245	8.13775
Geothermal65	38.2592	18.4617	8.41919	10.0425
Geothermal65	39.392	17.6812	8.26424	9.41698
Geothermal65	40.5248	16.082	9.44635	6.63563
Geothermal65	41.6576	18.3745	10.3734	8.00111
Geothermal65	42.7904	18.8384	10.7564	8.08202
Geothermal65	43.9232	18.2858	10.298	7.98787
Geothermal65	45.056	18.7674	11.0289	7.73853
Geothermal65	47.3216	16.2624	11.1061	5.15633
Geothermal65	48.4544	14.2859	10.3393	3.94663
Geothermal65	49.5872	13.041	10.5714	2.46965
Geothermal65	50.72	12.1061	9.3058	2.80025
Geothermal65	51.8528	11.4281	9.1301	2.29796
Geothermal65	52.9856	10.6663	8.47916	2.18716
Geothermal1550	6.03523	2.35467	1.37179	0.982879
Geothermal1550	7.16188	2.80923	1.42694	1.38228
Geothermal1550	8.28852	3.0553	1.47926	1.57604
Geothermal1550	9.41517	3.09777	1.52458	1.57319
Geothermal1550	10.5418	3.12908	1.87307	1.25602
Geothermal1550	11.6685	3.58955	1.83341	1.75614
Geothermal1550	12.7951	4.06693	1.95442	2.11251
Geothermal1550	13.9218	4.57202	2.11022	2.46181
Geothermal1550	15.0484	5.13619	2.29956	2.83663
Geothermal1550	16.175	5.34122	2.41776	2.92347
Geothermal1550	17.3017	5.37476	2.38326	2.9915
Geothermal1550	18.4283	6.56767	2.3076	4.26007
Geothermal1550	19.555	7.19333	2.56484	4.62849
Geothermal1550	21.8083	7.41601	2.86288	4.55313
Geothermal1550	22.9349	8.62024	3.13491	5.48533
Geothermal1550	24.0616	8.88449	3.22709	5.6574
Geothermal1550	25.1882	9.07401	3.43861	5.63539
Geothermal1550	26.3149	8.95853	4.06117	4.89735
Geothermal1550	27.4415	9.93126	4.3929	5.53836
Geothermal1550	28.5681	10.3541	4.79989	5.5542
Geothermal1550	29.6948	11.8865	4.70974	7.17672
Geothermal1550	30.8214	12.4739	5.15033	7.32354
Geothermal1550	31.9481	13.1191	5.70057	7.41856
Geothermal1550	33.0747	14.1383	5.20999	8.92835
Geothermal1550	34.2014	14.9673	6.33262	8.63468
Geothermal1550	35.328	14.5509	6.43061	8.12027
Geothermal1550	37.5813	15.1378	7.74808	7.38976
Geothermal1550	38.708	14.6163	7.63381	6.98247
Geothermal1550	39.8346	14.8901	7.39555	7.49455
Geothermal1550	40.9612	15.1285	9.12799	6.00051
Geothermal1550	42.0879	16.1194	8.43616	7.68327
Geothermal1550	43.2145	14.016	10.1195	3.89649
Geothermal1550	44.3412	15.0591	9.95511	5.10397
Geothermal1550	45.4678	14.2615	8.74537	5.5161
Geothermal1550	47.7211	11.8442	8.72925	3.11497
Geothermal1550	48.8478	12.4513	9.01279	3.43847
Geothermal1550	49.9744	10.1055	8.74241	1.36309
Geothermal1550	51.1011	10.4541	8.46352	1.99053
Geothermal1550	52.2277	9.05148	8.26069	0.790795
Geothermal1550	53.3543	8.47796	8.43772	0.0402397
Geothermal120	5.54628	2.63531	1.34141	1.2939
Geothermal120	6.6849	2.52141	1.48772	1.03369
Geothermal120	7.82352	2.79096	1.61308	1.17788
Geothermal120	8.96215	3.66153	1.5888	2.07273
Geothermal120	10.1008	4.1997	1.55645	2.64325
Geothermal120	11.2394	4.35845	1.76575	2.59269
Geothermal120	12.378	5.2186	1.65722	3.56138
Geothermal120	13.5166	4.6956	1.89133	2.80427
Geothermal120	14.6553	6.27146	2.09421	4.17725
Geothermal120	15.7939	5.94481	2.06781	3.877
Geothermal120	16.9325	7.75328	2.32828	5.425
Geothermal120	18.0711	8.52613	2.70228	5.82385
Geothermal120	19.2097	8.93318	2.63256	6.30062
Geothermal120	21.487	11.0664	3.36928	7.69716
Geothermal120	22.6256	10.2464	3.65045	6.59596
Geothermal120	23.7642	10.9047	3.9147	6.98999
Geothermal120	24.9028	14.1685	4.15748	10.0111
Geothermal120	26.0415	14.5254	5.10968	9.41569
Geothermal120	27.1801	14.9347	5.11388	9.82077
Geothermal120	28.3187	16.6163	5.71026	10.906
Geothermal120	29.4573	17.7356	7.11234	10.6233
Geothermal120	30.596	20.1597	6.68967	13.47
Geothermal120	31.7346	21.4172	7.71945	13.6977
Geothermal120	32.8732	16.896	7.48563	9.41035
Geothermal120	34.0118	19.9129	7.75564	12.1573
Geothermal120	35.1504	22.0809	9.35848	12.7224
Geothermal120	37.4277	23.4757	9.31975	14.1559
Geothermal120	38.5663	21.6549	9.79283	11.8621
Geothermal120	39.7049	24.5952	10.5145	14.0807
Geothermal120	40.8436	24.6363	11.5681	13.0683
Geothermal120	41.9822	24.1452	12.0253	12.1199
Geothermal120	43.1208	23.6444	13.363	10.2814
Geothermal120	44.2594	21.7059	14.7567	6.94916
Geothermal120	45.398	25.2354	15.7865	9.44895
Geothermal120	47.6753	19.5547	14.1974	5.35729
Geothermal120	48.8139	16.602	13.1064	3.49552
Geothermal120	49.9525	14.7261	12.1479	2.57819
Geothermal120	51.0911	13.5416	13.2786	0.262999
Geothermal120	52.2298	12.5836	10.3486	2.23504
Geothermal120	53.3684	11.7419	9.28648	2.45547
Geothermal250	5.22689	4.01691	1.34997	2.66694
Geothermal250	6.38379	4.21639	1.61968	2.59672
Geothermal250	7.5407	3.85126	1.63029	2.22097
Geothermal250	8.6976	4.46299	1.50625	2.95673
Geothermal250	9.85451	5.7604	1.85194	3.90845
Geothermal250	11.0114	6.1509	1.89928	4.25162
Geothermal250	12.1683	6.74668	2.05786	4.68882
Geothermal250	13.3252	7.26249	2.18076	5.08172
Geothermal250	14.4821	7.60193	2.3145	5.28743
Geothermal250	15.639	9.14018	2.73244	6.40774
Geothermal250	17.9528	11.3703	3.0651	8.3052
Geothermal250	19.1098	12.4427	1.27712	11.1656
Geothermal250	21.4236	13.9658	3.69836	10.2674
Geothermal250	22.5805	15.6691	3.90127	11.7678
Geothermal250	23.7374	15.7714	4.49628	11.2752
Geothermal250	24.8943	14.7593	5.12325	9.63604
Geothermal250	26.0512	16.9542	5.39316	11.5611
Geothermal250	27.2081	20.8786	6.12229	14.7563
Geothermal250	28.365	19.431	6.48536	12.9456
Geothermal250	29.5219	23.6091	6.75592	16.8532
Geothermal250	30.6788	23.5443	7.13151	16.4128
Geothermal250	31.8357	24.0633	8.21708	15.8462
Geothermal250	32.9926	24.7423	9.00106	15.7412
Geothermal250	34.1495	24.4747	9.1536	15.3211
Geothermal250	35.3064	27.7001	10.7915	16.9086
Geothermal250	37.6202	26.6042	11.1495	15.4547
Geothermal250	38.7772	27.2069	13.5838	13.6231
Geothermal250	39.9341	27.7408	15.0684	12.6724
Geothermal250	41.091	31.7289	16.0384	15.6905
Geothermal250	42.2479	27.1948	15.8537	11.3411
Geothermal250	43.4048	29.1269	16.8552	12.2718
Geothermal250	44.5617	28.9832	17.6256	11.3576
Geothermal250	45.7186	29.8273	19.1149	10.7124
Geothermal250	48.0324	21.9655	18.008	3.95755
Geothermal250	49.1893	18.8962	15.6314	3.26483
Geothermal250	50.3462	18.1724	15.3094	2.86292
Geothermal250	51.5031	14.7991	11.8582	2.94092
Geothermal250	52.66	12.7707	11.489	1.28167
Geothermal250	53.8169	12.0997	10.7007	1.39904
Geothermal750	4.6988	1.12242	0.0646701	1.05775
Geothermal750	5.869	1.58131	0.302843	1.27846
Geothermal750	7.03921	1.75519	0.271505	1.48368
Geothermal750	8.20941	2.07642	0.406458	1.66996
Geothermal750	9.37961	2.21092	0.515072	1.69585
Geothermal750	10.5498	2.52706	0.684211	1.84285
Geothermal750	11.72	2.93449	0.883745	2.05075
Geothermal750	12.8902	3.50993	0.997143	2.51278
Geothermal750	14.0604	3.23781	1.04649	2.19132
Geothermal750	15.2306	3.75484	1.24564	2.50919
Geothermal750	16.4008	3.72791	1.08954	2.63837
Geothermal750	17.571	4.74004	1.06805	3.67199
Geothermal750	18.7412	4.82306	1.3825	3.44056
Geothermal750	21.0816	6.52462	1.81725	4.70737
Geothermal750	22.2518	7.62373	1.964	5.65973
Geothermal750	23.422	7.56387	2.044	5.51987
Geothermal750	24.5922	7.46372	2.28338	5.18034
Geothermal750	25.7625	7.99563	2.93214	5.06349
Geothermal750	26.9327	8.71425	3.01169	5.70256
Geothermal750	28.1029	9.63243	3.36842	6.26402
Geothermal750	29.2731	9.06767	3.46363	5.60404
Geothermal750	30.4433	10.8045	3.99222	6.81223
Geothermal750	31.6135	9.92755	3.72077	6.20678
Geothermal750	32.7837	11.2006	4.36237	6.83827
Geothermal750	33.9539	10.4768	4.87377	5.60306
Geothermal750	35.1241	13.8315	4.9988	8.8327
Geothermal750	37.4645	13.4173	5.72145	7.69583
Geothermal750	38.6347	12.7589	5.67878	7.08015
Geothermal750	39.8049	13.4043	6.82183	6.58248
Geothermal750	40.9751	12.3059	7.31214	4.99372
Geothermal750	42.1453	11.3056	7.337	3.96862
Geothermal750	43.3155	13.5072	8.27045	5.2367
Geothermal750	44.4857	12.9099	8.18027	4.72965
Geothermal750	45.6559	13.7032	7.48028	6.22291
Geothermal750	47.9963	11.9777	8.17597	3.80175
Geothermal750	49.1665	10.969	7.72357	3.24543
Geothermal750	50.3367	11.7987	7.74094	4.0578
Geothermal750	51.5069	9.88473	6.94475	2.93998
Geothermal750	52.6771	8.56294	6.95789	1.60505
Geothermal750	53.8473	7.88623	6.62096	1.26527
Geothermal1250	4.75456	1.92982	0.479385	1.45043
Geothermal1250	5.90737	1.79368	0.395982	1.3977
Geothermal1250	7.06018	2.44234	0.606613	1.83573
Geothermal1250	8.21298	2.37306	0.479963	1.8931
Geothermal1250	9.36579	2.71853	0.578243	2.14028
Geothermal1250	10.5186	3.16064	0.731568	2.42907
Geothermal1250	11.6714	4.21521	0.788087	3.42712
Geothermal1250	12.8242	4.48491	0.618629	3.86628
Geothermal1250	13.977	4.61874	1.173	3.44573
Geothermal1250	15.1298	4.68541	0.81567	3.86974
Geothermal1250	16.2826	6.77449	1.13957	5.63492
Geothermal1250	17.4354	7.55936	1.224	6.33536
Geothermal1250	18.5883	7.3976	1.51183	5.88577
Geothermal1250	20.8939	8.63609	2.00286	6.63324
Geothermal1250	22.0467	10.813	1.44642	9.36661
Geothermal1250	23.1995	10.2817	1.8164	8.46529
Geothermal1250	24.3523	10.1915	2.35756	7.83397
Geothermal1250	25.5051	12.7608	2.54613	10.2146
Geothermal1250	26.6579	14.3627	3.31221	11.0505
Geothermal1250	27.8107	15.5754	3.24473	12.3306
Geothermal1250	28.9635	15.9242	3.83578	12.0885
Geothermal1250	30.1163	17.5562	3.79255	13.7636
Geothermal1250	31.2691	19.3105	4.85182	14.4587
Geothermal1250	32.4219	18.3987	5.40503	12.9936
Geothermal1250	33.5748	20.2405	5.08867	15.1518
Geothermal1250	34.7276	19.3516	5.67512	13.6765
Geothermal1250	37.0332	19.9562	6.4293	13.5269
Geothermal1250	38.186	18.9933	7.83326	11.1601
Geothermal1250	39.3388	19.0508	8.34483	10.706
Geothermal1250	40.4916	16.9229	9.18857	7.73434
Geothermal1250	41.6444	18.2486	10.5884	7.66023
Geothermal1250	42.7972	19.1343	10.0221	9.11216
Geothermal1250	43.95	18.7263	11.036	7.69034
Geothermal1250	45.1028	17.7612	12.977	4.78427
Geothermal1250	47.4084	15.9571	10.179	5.77809
Geothermal1250	48.5613	15.9967	11.5669	4.42976
Geothermal1250	49.7141	14.4533	12.8013	1.65197
Geothermal1250	50.8669	16.7313	12.1302	4.60103
Geothermal1250	52.0197	15.6117	13.5746	2.03706
Geothermal1250	53.1725	14.7524	13.5875	1.16492
Geothermal45	5.01278	1.32195	0.633661	0.688289
Geothermal45	6.16269	1.21964	0.558224	0.661412
Geothermal45	7.3126	1.32731	0.780686	0.546619
Geothermal45	8.46251	1.24943	0.810576	0.43885
Geothermal45	9.61242	1.49969	0.929448	0.570238
Geothermal45	10.7623	1.89258	0.954332	0.938246
Geothermal45	11.9122	2.0935	1.05216	1.04134
Geothermal45	13.0622	2.2614	0.975038	1.28636
Geothermal45	14.2121	2.21992	1.03763	1.18229
Geothermal45	15.362	2.88476	1.24023	1.64453
Geothermal45	16.5119	3.30537	1.41776	1.88761
Geothermal45	17.6618	3.40033	1.35834	2.04199
Geothermal45	18.8117	3.63217	1.73709	1.89508
Geothermal45	21.1115	5.58272	1.77866	3.80406
Geothermal45	22.2614	5.5898	1.8906	3.6992
Geothermal45	23.4114	6.59774	2.35867	4.23907
Geothermal45	24.5613	7.32311	2.32102	5.00209
Geothermal45	25.7112	7.4066	2.49532	4.91128
Geothermal45	26.8611	7.81858	2.92013	4.89845
Geothermal45	28.011	8.36146	3.22261	5.13884
Geothermal45	29.1609	10.5441	3.44885	7.09529
Geothermal45	30.3108	10.2659	3.87024	6.39562
Geothermal45	31.4607	11.2507	3.93229	7.31845
Geothermal45	32.6106	10.6108	4.01029	6.60049
Geothermal45	33.7606	11.1378	4.9025	6.23532
Geothermal45	34.9105	11.8519	4.85598	6.99591
Geothermal45	37.2103	11.9849	5.58025	6.40463
Geothermal45	38.3602	13.436	6.52391	6.91205
Geothermal45	39.5101	13.2954	5.95962	7.33576
Geothermal45	40.66	13.4061	6.84643	6.5597
Geothermal45	41.8099	13.9345	6.45981	7.47466
Geothermal45	42.9598	13.217	7.51128	5.70577
Geothermal45	44.1098	12.9753	7.58769	5.38761
Geothermal45	45.2597	11.4117	8.24422	3.1675
Geothermal45	47.5595	11.3429	8.08518	3.25771
Geothermal45	48.7094	11.0601	8.13757	2.92254
Geothermal45	49.8593	10.1041	7.76262	2.34146
Geothermal45	51.0092	8.66782	7.74789	0.919928
Geothermal45	52.1591	9.16617	7.36187	1.8043
Geothermal45	53.309	9.33825	6.91839	2.41986
Geothermal500	5.3978	2.62	1.49446	1.12554
Geothermal500	6.53934	2.74424	1.31097	1.43327
Geothermal500	7.68088	2.94079	1.39071	1.55008
Geothermal500	8.82242	4.29215	1.44347	2.84868
Geothermal500	9.96396	4.08604	1.65363	2.43241
Geothermal500	11.1055	5.38337	1.80156	3.5818
Geothermal500	12.247	5.44614	1.83866	3.60748
Geothermal500	13.3886	5.73826	2.02325	3.71501
Geothermal500	14.5301	5.64959	1.88489	3.7647
Geothermal500	15.6716	7.30295	2.06468	5.23827
Geothermal500	16.8132	8.10842	2.75175	5.35667
Geothermal500	17.9547	8.92071	2.74503	6.17568
Geothermal500	19.0963	8.41945	2.92361	5.49585
Geothermal500	21.3793	9.9858	3.7302	6.2556
Geothermal500	22.5209	11.3406	3.65466	7.68591
Geothermal500	23.6624	13.4203	3.91025	9.51004
Geothermal500	24.804	13.4798	3.58451	9.89531
Geothermal500	25.9455	15.9122	4.43031	11.4819
Geothermal500	27.087	15.6498	4.27806	11.3718
Geothermal500	28.2286	18.1174	5.10277	13.0146
Geothermal500	29.3701	16.5837	6.5052	10.0785
Geothermal500	30.5116	18.3759	6.80081	11.5751
Geothermal500	31.6532	18.9166	6.8463	12.0702
Geothermal500	32.7947	20.8675	7.22316	13.6444
Geothermal500	33.9363	22.0876	8.0077	14.0799
Geothermal500	35.0778	24.6385	9.14308	15.4954
Geothermal500	37.3609	22.7707	9.64074	13.1299
Geothermal500	38.5024	24.2225
Geothermal500	39.644	23.5763	10.1606	13.4157
Geothermal500	40.7855	22.634	12.5315	10.1025
Geothermal500	41.927	27.5893	15.1948	12.3945
Geothermal500	43.0686	21.7166	16.9486	4.76803
Geothermal500	44.2101	24.9514	14.7305	10.221
Geothermal500	45.3516	25.1658	18.6093	6.55644
Geothermal500	47.6347	18.9906	14.8747	4.1159
Geothermal500	48.7763	16.8219	13.9417	2.88014
Geothermal500	49.9178	15.9881	12.4505	3.53758
Geothermal500	51.0593	13.1986	14.1426
Geothermal500	52.2009	12.2791	10.0977	2.18147
Geothermal500	53.3424	10.8773	10.4896	0.387713
Geothermal1000	5.21608	2.92371	1.3419	1.58181
Geothermal1000	6.36504	3.3102	1.38362	1.92658
Geothermal1000	7.514	3.93491	1.27321	2.66171
Geothermal1000	8.66296	3.60678	1.5119	2.09488
Geothermal1000	9.81192	3.70344	1.42621	2.27723
Geothermal1000	10.9609	4.49838	1.41786	3.08053
Geothermal1000	12.1098	4.23185	1.5694	2.66245
Geothermal1000	13.2588	5.7168	1.7902	3.92659
Geothermal1000	14.4078	6.20243	1.77334	4.42909
Geothermal1000	15.5567	6.92576	1.96453	4.96123
Geothermal1000	16.7057	7.4504	2.07977	5.37062
Geothermal1000	17.8546	7.29522	2.31182	4.9834
Geothermal1000	19.0036	8.74244	2.52023	6.22221
Geothermal1000	21.3015	9.80493	2.99793	6.807
Geothermal1000	22.4505	11.189	3.12111	8.06789
Geothermal1000	23.5994	12.1414	3.3585	8.78289
Geothermal1000	24.7484	11.689	3.39892	8.29012
Geothermal1000	25.8974	11.565	3.87327	7.69178
Geothermal1000	27.0463	14.8345	3.91382	10.9206
Geothermal1000	28.1953	14.6294	4.55922	10.0702
Geothermal1000	29.3442	18.0188	5.01314	13.0057
Geothermal1000	30.4932	14.5718	4.81109	9.76071
Geothermal1000	31.6422	18.4661	6.01873	12.4473
Geothermal1000	32.7911	17.4154	6.19977	11.2156
Geothermal1000	33.9401	19.3864	6.73029	12.6561
Geothermal1000	35.089	18.8573	6.50566	12.3516
Geothermal1000	37.387	17.0488	8.1634	8.8854
Geothermal1000	38.5359	19.3165	9.54345	9.7731
Geothermal1000	39.6849	19.3557	9.82975	9.52592
Geothermal1000	40.8338	22.3849	10.8259	11.559
Geothermal1000	41.9828	19.9013	11.1809	8.72039
Geothermal1000	43.1318	19.124	13.0006	6.12344
Geothermal1000	44.2807	19.9617	12.5721	7.38965
Geothermal1000	45.4297	16.8212	14.8475	1.97364
Geothermal1000	47.7276	15.6751	11.5022	4.1729
Geothermal1000	48.8766	12.1185	11.9084	0.210085
Geothermal1000	50.0255	12.9325	11.0873	1.84521
Geothermal1000	51.1745	11.4287	10.8519	0.576797
Geothermal1000	52.3234	10.3302	10.688
Geothermal1000	53.4724	9.47795	9.66654

## Sheet: Table S7. MMRT values
Table S7. Parameter values estimated from the modified MMRT model fits for each temperature response curve.
ID	H (J mol-1 K-1)	A (J mol-1 K-2)	B (J mol-1 K-1)	S (J mol-1 K-1)	Topt (°C)	Tinf (°C)
BAZIZ	16019	-35.9282	-3639.07	-169.002	31.6	18.1
BODOT	18292.8	-8.0154	-2477.3	-160.493	34.9	17.7
DAFOB	27745.2	-89.3735	-4018.97	-134.579	33.1	21.9
DIZAF	24504.2	-187.345	-5868.45	-142.134	30.7	21.8
FIGIZ	19425.2	-126.548	-5399.86	-159.961	30.5	20.4
FODAF	27218.6	-78.9862	-3528.97	-130.43	33.7	22
FUHAS	21967.6	-94.2654	-4205.06	-149.435	31.8	20.8
GAPIL	17749.4	-30.0093	-4187.11	-161.506	31.5	18.6
GIGPA	28475.9	-122.752	-5029.65	-131.384	32	22
HADIV	30832.3	-106.84	-4565.69	-122.815	32.9	22.4
HIHAK	23853.6	-18.535	-2792.37	-143.09	35.6	20
JALAM	26946	-65.7597	-3465.27	-136.395	33.9	21.7
JOBAS	19606.7	-61.1294	-4898.96	-156.727	31	19.6
JUBIF	23551	-18.7119	-3058.36	-148.408	34.8	19.8
KAKIG	27648.7	-32.7266	-4576.73	-132.95	33	20.8
KILOR	25330.6	-129.534	-5224.09	-142.68	31.4	21.5
KOFIF	12636.1	15.3901	-2383.01	-176.738	33.7	14.7
MIJOZ	33471.7	-148.604	-4718.78	-112.099	32.8	23.2
MUFOV	23097.4	-67.875	-3169.31	-147.402	33.5	21.1
NAVUV	20240.9	-21.8497	-3270.31	-157.304	33.4	18.9
NUMIT	24898.3	-247.674	-5626.87	-147.27	30.7	22.6
RURIH	25404	-27.5602	-2876.86	-137.762	35.5	20.8
SUTUK	25973.1	-66.5518	-4398.19	-138.406	32.6	21
TIFOG	28787.2	-74.3858	-4569.09	-129.866	32.8	21.6
TUJIP	27361.8	-93.4354	-3829.19	-128.697	33.2	22.1
ZANUN	25344.9	-8.97294	-2917.67	-140.227	36	20.2
ZAVIT	25159.1	-36.7966	-4837.87	-140.015	32.2	20.3
ZOMIH	15059.8	-40.1147	-2846.54	-177.691	32.4	18
Geothermal15	47589.4	-66.0532	-2726.06	-75.5701	39.4	27.4
Geothermal25	46586.9	-50.5342	-3586.32	-77.3465	37.9	25.8
Geothermal45	57651.8	-158.046	-4742.24	-39.0641	35.6	26.6
Geothermal50	47832.8	-114.169	-3560.63	-69.4319	36.5	26.2
Geothermal65	38758.4	-32.0072	-3556.1	-100.339	37.1	23.9
Geothermal120	31350	32.0921	-2917.41	-121.445	42.7	21
Geothermal150	35680.8	-117.838	-3304.62	-105.581	34.9	24.5
Geothermal250	28554.2	-54.856	-3627.07	-128.097	34.2	21.7
Geothermal295	21501.6	-2.70419	-2772.13	-149.138	35.4	18.7
Geothermal305	24324.9	-25.8998	-3228	-141.422	34.5	20.2
Geothermal350	40772.4	-125.569	-3413.41	-90.8669	35.4	25.3
Geothermal500	30394.4	-15.3975	-3645.76	-123.839	35.4	21.4
Geothermal750	29568.8	-78.4853	-3423.23	-131.663	34.3	22.6
Geothermal1000	29956.6	-74.712	-3830.73	-126.107	33.9	22.3
Geothermal1250	35381.5	-146.996	-5774.53	-106.605	32.3	23
Geothermal1495	28927.6	-26.5879	-2575.58	-127.477	37.4	22.2
Geothermal1505	32006.5	-97.3773	-4094.69	-116.29	33.6	22.8
Geothermal1550	33283.1	-71.2028	-3660.4	-118.749	34.8	23.1
Geothermal1595	35779.6	-56.9232	-2814.15	-109.341	37.2	24.4

## Sheet: Table S8. AIC values
Table S8. AICc values for MMRT and the modified version of MMRT model fits for each of the temperature response curves.
ID	AICc of MMRT	AICc of MMRT with linear variation of ∆CP‡	Δ AICc
BAZIZ	-20.0512	-16.4522	3.59906
BODOT	-29.4359	-25.1441	4.2918
DAFOB	-24.3913	-34.1032	9.71184
DIZAF	-13.7833	-26.6034	12.8202
FIGIZ	-18.3211	-33.8517	15.5306
FODAF	-27.3339	-30.8267	3.49275
FUHAS	-19.3352	-21.9299	2.59473
GAPIL	-21.8123	-17.9105	3.90179
GIGPA	-19.4196	-30.9896	11.5701
HADIV	-24.1474	-32.8477	8.70038
HIHAK	-41.265	-37.8532	3.41178
JALAM	-35.6963	-35.5801	0.116138
JOBAS	-32.7111	-32.8855	0.174426
JUBIF	-39.8935	-36.493	3.4005
KAKIG	-19.6401	-14.9504	4.68974
KILOR	0.438399	2.24101	1.80262
KOFIF	-42.8152	-39.276	3.53915
MIJOZ	-5.88107	-9.65402	3.77295
MUFOV	-23.0525	-23.5218	0.469304
NAVUV	-24.8116	-21.0087	3.80292
NUMIT	4.67598	-1.66057	6.33656
RURIH	-28.4141	-24.9872	3.42692
SUTUK	-22.6146	-22.5925	0.0220823
TIFOG	-21.4004	-21.6354	0.235024
TUJIP	-16.8659	-17.5004	0.634498
ZANUN	-25.5749	-21.2952	4.27968
ZAVIT	-24.7384	-21.6221	3.11626
ZOMIH	-16.7099	-13.1751	3.53483
Geothermal15	-35.0958	-36.2986	1.20287
Geothermal25	-19.482	-17.8711	1.61089
Geothermal45	-6.10643	-15.7086	9.60218
Geothermal50	-48.117	-66.9038	18.7868
Geothermal65	-38.6491	-36.9834	1.66567
Geothermal120	-27.7396	-25.6147	2.12494
Geothermal150	2.84251	2.00648	0.836026
Geothermal250	-34.4205	-34.4522	0.031735
Geothermal295	-43.5234	-40.757	2.76641
Geothermal305	-59.2682	-57.6968	1.57145
Geothermal350	-15.6327	-20.9024	5.26962
Geothermal500	-30.8945	-28.2321	2.66248
Geothermal750	-34.2854	-38.1093	3.8239
Geothermal1000	-31.9128	-33.9268	2.01401
Geothermal1250	-23.8839	-43.4773	19.5934
Geothermal1495	-72.0702	-71.6546	0.415623
Geothermal1505	-61.8719	-93.3312	31.4593
Geothermal1550	-32.7179	-33.8336	1.11572
Geothermal1595	-2.13728	-0.207091	1.93019
